# Supplementary material for: Potential and expression of carbohydrate utilization by marine fungi in the global ocean
Source: Microbiome. 2021 May 11;9:106. doi: 10.1186/s40168-021-01063-4 (PMC8114511; doi:10.1186/s40168-021-01063-4)
Supplement: Supplementary file 4 — Additional file 3. [file 40168_2021_1063_MOESM4_ESM.fasta]

>MATOU-v1_1282530
GTCATCCTGTTTGAGTACTTCCTCATGGATCTAGGGGCTACAAAGTACCTCGAGTACATC
CCCTCTATCACTTGGTCTACGTGGCCCTCGACGGAGGTATACAACAACTTTGGCTGGTTC
ATCAACGAGACCCTGCAGATAATCTACCTGATACCAAATGCCGCGCCGCAGCTGACTTGG
AACTTCTGCACGGGCGTGCTATGGACAATCCCCGTGCAGCTCCAGAATTCCTGGCTAGTG
CTCCTCGGCGTGGTGATCATCAAAGAGATCAAAACGCCCTGGAAACGATTCGGCTACTAC
GCCTTCGTCATCATCAATCACTGGTACGGGCTATCCTGGGGCTCATACTTCTGGTTTGGA
CTTATGATGGCGGATCTGGACATCACGTACAAGTACCGCAAGTTCATCCAGTCTCGCTGG
TGGGTGCACTACCCGATGATGACTTTAGCAAGCATCCTGGTCTTTGTCTGCCTGGCCAAC
GACCTGCTTAGTATCTGGGTAGGCTGGACCTTCAGTACGGAAGAACGCAACATCCACCCG
GAATTCCAGAGCGGGTATAACCTTGGCCAGACGGAAGAGGCTGGCTATCCGGACTACACG
GAGCCCAAGCTTAACGGGCTTATCTTCGCCGTAGCGTCTCAGTATATCGTGGAGCTGAGC
ACGTGGGTACAAGCGTGCCTGTCCACTAAAGTCTTCCTCTGGCTGTTCCCGCACGTCTTC
ACCATCTACCTCATTCACGGCCTCGTGTTCTGGTCCATTGGGTCCCTAGTATGCGTCTTC
TTCGCCGCACAGGGTCTAGTTTACTGGTTGAACATGCTACTCACGGCGCTGATCTGCTAT
GTGACGCTATTCGCATCGTTGCCGATCGTCACGCCCGTGATGGAGATGCTGGGGAAGGAA
ATCACAAAAGGCATCTGGATCAGTGCGAGCGAGGAGCCAGCACCGTGGCGTCCGAGCACT
TATCCTTTTACGATCGACGAGATCCGAGAGATGGTACATCGGAGGGATGACGAGGAGGAG
GATGGGTATGATGGGAAGGGAAAAGGGAGGGCAACTTAGGGTGTTGGTAATGTTTAATAT
TCTTATACAGGGAAGACATAGCGAAGGCGTTTCTTGGGAAAGAGGTTGATAGTATCCGAG
CATGAATTAACGGCATTGGTTCCATGTACGCACGATTTCTATTGTCTCGGTCTTCCAGTT
GGCCCATTTCAAAGTTGTGAAATCGAAGGACTTCTTCTCACGGCGACATCGGCAGCTGAG
AGCGCATATCCCTCTATGCATACTCTGCTTTCAAAGGATCGTTAACGGAGGCTGAACGTC
TGCCGCCTAGCCAGAGTGATGGAATCGCTATGATCTCCCGACGAACACACTTAAAA
>MATOU-v1_1282531
GTCATCCTGTTTGAGTACTTCCTCATGGATCTAGGGGCTACAAAGTACCTCGAGTACATC
CCCTCTATCACTTGGTCTACGTGGCCCTCGACGGAGGTATACAACAACTTTGGCTGGTTC
ATCAACGAGACCCTGCAGATAATCTACCTGATACCAAATGCCGCGCCGCAGCTGACTTGG
AACTTCTGCACGGGCGTGCTATGGACAATCCCCGTGCAGCTCCAGAATTCCTGGCTAGTG
CTCCTCGGCGTGGTGATCATCAAAGAGATCAAAACGCCCTGGAAACGATTCGGCTACTAC
GCCTTCGTCATCATCAATCACTGGTACGGGCTATCCTGGGGCTCATACTTCTGGTTTGGA
CTTATGATGGCGGATCTGGACATCACGTACAAGTACCGCAAGTTCATCCAGTCTCGCTGG
TGGGTGCACTACCCGATGATGACTTTAGCAAGCATCCTGGTCTTTGTCTGCCTGGCCAAC
GACCTGCTTAGTATCTGGGTAGGCTGGACCTTCAGTACGGAAGAACGCAACATCCACCCG
GAATTCCAGAGCGGGTATAACCTTGGCCAGACGGAAGAGGCTGGCTATCCGGACTACACG
GAGCCCAAGCTTAACGGGCTTATCTTCGCCGTAGCGTCTCAGTATATCGTGGAGCTGAGC
ACGTGGGTACAAGCGTGCCTGTCCACTAAAGTCTTCCTCTGGCTGTTCCCGCACGTCTTC
ACCATCTACCTCATTCACGGCCTCGTGTTCTGGTCCATTGGGTCCCTAGTATGCGTCTTC
TTCGCCGCACAGGGTCTAGTTTACTGGTTGAACATGCTACTCACGGCGCTGATCTGCTAT
GTGACGCTATTCGCATCGTTGCCGATCGTCACGCCCGTGATGGAGATGCTGGGGAAGGAA
ATCACAAAAGGCATCTGGATCAGTGCGAGCGAGGAGCCAGCACCGTGGCGTCCGAGCACT
TATCCTTTTACGATCGACGAGATCCGAGAGATGGTATATCGGAGAGATGACGAGGAAGGG
GATGGGTATGATGGGAAGGGTAAAGGGAGAGCAGCTTAGGGTGTTGGTAATGTTTAATAT
TTTTATACAGACAAGACATAGCGAAGGCGTTCTTGGGAGGGACGGAGAGTATGAATTAAC
GGCATCGGTCCCGGGTACATACAGTGTGTCGTATCATCTTTCAGAACTTTCAGTTAACTC
ATTTCAAAGTCGTAAATCCGAAGAATCCGATGTTGAAGCGGCAATAGCAGCTGAGAGCGC
ACGTCTTTCTGTCAATACACCACCGCTGAAGGATCATTGACGAGAATTGCACATCCTCCG
CCCACCTGAAGTAGTTCGATTGCTATACGCTCCTTGCCATCTACTGCTCATCCTTCACCT
CCTCACCTAACGGCGCCATCCACGCACAAGCCTTCTTGCGGAACAACTCCAATCTGGGCG
CCGGGAGGTCTACCTCATCGGCAAAGAGACCGTACTGCAAGCACCAGACATCCGGAGCAT
GACCTTCAATAATCCGCACGGGACTGCCGCATTCTGAACACATACTGCGCTCCATAGGCT
TGCCACTACCCGTGTCGGCATCGATGTAAGTGACGTGGCTACGGCCAGTTATCTCGACGT
GTTGTTTCGGGACCATAAAAGCGAAGGAGGCGATGCCGCCGCTGCGACGCTTGCAGGATG
CGCAATGGCATATCAGGGAGTCGAAGTTGGTCAGCGGCGCATCTACGGATACTTCGACCT
TGCCGCAGAGACAGCGTCCTTTGGTGGGCATATTGTTATGACAGAGCTGGTCCCACTTCG
CTGAATTGGCTTTCTAGTCCAGCTTTCAAGATCCAGATATCTTACTGGCTTTATTGAACG
AATCACGCGCAGGTCAAGATTGCCAAATACTGTTGAAAGACCTCAAGATGATGATGCATG
ACGTCAATCACCCAAGGCATTAAGGCATCT
>MATOU-v1_1284204
GGGAAGAACATTATGCCGTATGCTTGTATTTACCGTCGGCAACTCGATATAATCTTGAAT
TCTCCGTTCCTGCTTCGGCGTCATATGCTGCCATAAAGGTAGGAGGTATCCCACATCTTC
CTCGCAGACGACCTTGCCCATCCTTGCCCTTGATCATCATGGCTGTTCTTCGAAACCTCT
GGTCGGTATTTCTCGGGCTTCTCTTGCTTCATAGTGTATCAGCCTCAGCACACAGTCGCA
GAGCATGTCAGGCTCCGACCCGGAATCCACTAAAAGGATGTCCAAAGAACACTCTCCTGG
TCGGCAAAGATGAGAAGTTCACCAGTGTTCAGGACGCCGTGCTAAGCCTTCCTAACAACA
CTACACCGTACACGATCCTAGTGCTCCCAGGCGACTACAGAGAACAGGTCAACGTCACCC
GCCAAGGACCTTTGACTTTACTGGGGCAGACGAGCCATCCTAACGATGCGCTCAAAAACA
CCGTCAATGTTTTCTGGAGCAACGCCACCGGTACAGACTCCACTGGTTCCTACGATAACG
CCTATACCAGTGTCCTTACCATTGCGCCAACTTTCAATGCCAGCAAGACGGGAACTGGTC
CTACTGGTGATCCCGTGCCTGCTGACACTCCGTTTGGGAACTATAATTTCCGGACGTACA
ATCTGAACTTCATTAATGACTATTTGCCTTATTCTGCGGGTCCCGCTTTGGCGTTGAGTA
TGAGCTATGCAAACGCCGGCTTTTACTACACACAGTTCTTAAGCTATCAGGATACCATTT
ACGTCGGAAAGCTAGGCAATGCGTACATGTACAAGTCCATCATTGGCGGCCAGACTGACT
TCTTCTACGGCTTCGGAACCTGCTGGGTAACAGACTGCGATATCCAGCTGCGTGGCTGCG
GCGGTGGTATCACAGCCTGGAAGGGTACCAATACGACGTTTGAGAACAAATATGGTGTTT
ATATCACCAAGTCTCACGTCGCAAAGGCGAATTACACTCTTGATATAAAAGAGGAATGCT
CGCTCGGCCGGCCCTGGAACGCTCAGCACCGGTCTATCTTCTCCTTTGACTATTTGGACG
ATAGTATCCGTCCAAGCGGTTACACTCAGTGGGGAGACACCGATCCGAGGATCAACTTCA
ATACTACCATGGCGGAGTACAAGGACTACGGCCCAGGCTTCAACCTTACAGGTCGCCTGG
AGTGGAGCAACGTCACGATCGAGATGACTCCGGAGGAATACGCGCCGTATAGCTCACCGG
CGAAGGTCTTCCAGTACCCCTTTAGTGGCAAGTTTGGAAATGTGCAGTGGATCGACTGGC
ATCCTGAGGCCTAGCTGCTATACTGATATCCCTCGGTGTGACCCGTGAGATAGGTGCCAG
GTGGAATGAATGCTTGAGCCCATAAGTAGCATTTGCGAGTTTTGGTTTGACGGAAGTTGT
CTGACAAAGTGACGCATATTTTGTTTGAGGTGCACACTCCTATAGCGTTAGACAGAACGA
AACCGCAGATCGATATAGACTACTAAAGGAGATTAGAAGATCACTTTAA
>MATOU-v1_1284261
AAGGAGTGGCAAGAGCGCGCCAAAGCGTTTGAGCCACTTGATCTTAAGAAGGTTCAGCAG
CCACTCGCCGAGCTCGACAACCACCTCACTCTTCGCACGTATATTGTGGGATACAGTGCC
ACCGAGGCGGATTTGACAGTATGGAAGGCCTTGAAGAGCAATCGGGTGGCATTCGGCTTC
ATCAAAGGCGGCGCAATGGCGAGCTTGTGGAGGTGGTACAGCTTCATCCAGGATACCGAA
AAGCCGACAGTGGAGCAACCAAAGGCGGCAGAGAAGAAACAGCAGGACGAGGGAGCGAGC
TATGATATCGGCCTGCAAGACACGGAGCAGGGTGTCGTGACCAGATTCCCGCCTGAGCCA
TCAGGATATCTCCACATTGGACATGCAAAGGCAGCTTTGTTGAACGACTACTTCGCGCAC
AAGAAGTACAACGGCAAAATGATTGTGCGCTTTGACGACACGAATCCCTCCAAGGAGAAG
CAGGAGTTTCAGGACTCAATCATCAAAGACTGTGAGCTCCTGGGCGTCAAGCCGGACCAA
ATCACGTACACTTCCGACTATTTCCAGGACCTGTATGAGCGTGCTGTCCAAATGATTAAG
GACGGGAATGCGTACGCCGACAACACCCCTCAGGAGCAACTTCAAAAAGAGCGGATGGAG
CGCAAGGAGTCTGCTCACCGTAATGACACCGTGGACGACAACCTAGCCCACTTCGAGGAG
ATGAAGAAGGGCACTGAGGAAGGCACCAAGTGGTACATCCGTGCGAAGTTGGACATGAGC
AGCGATAATGGTGCCCTGCGTGACCCAGTCATCTACCGTTGCAACCCACAGCCGCACCAC
CGAACGGGCAGCACTTGGAAAATCTACCCGACCTACGACTATGCTTGTCCAGTCGTCGAT
AGTGTTGAGGGTATTACCCACGCACTGCGCACGACTGAATACAACGATCGCGACCCACAG
TACCAATGGTTCATCAAGACGCTCAAGCTGAGACATGTCTACAACTGGAACTTCTCCCGC
ATGAACTTCATCCGTACCGTTCTTTCCAAGCGTAAGCTGACGAAGCTTGTGGACTCTGGA
ATCGTATGGGGCTGGGATGACCCGCGTATGGCGACCGTCAGAGGTATCAGAAGACGGGGT
ATGACGATCCCAGCGCTACAAGAATTCATTTTGAAGCAAGGTCCGAGTAAGAACATCAAT
TACATGGACTGGACGACCTTCTGGGCAACCAACAAGAAGTACATTGACCCTGTTGCTGCG
CGTTACACTGCTGTAACGAAGCAAGATGCGGTCAAGTGTACAGTGATTGGAGCGCCGGAG
GCTCCCCGTACGGAGGAAAAGGATTTGCATGCCAAGAACCCCGAGGTGGGCAAGAAGAAG
GTCGTCTTCTCCAAGAACATCATCATGGATCAAGCCGACGCTCAGAGCTTTGCCGATAAC
GAGGAGATTACCTTGATGAATTGGGGTAACGCTATCGTGCGGGAGAAGACCTACAGCCTG
AACCCAGTCAACTTTGTCGCCTCCGTCGCTGGCCAGGGCGAGCGTCTAGTCACCGAGCTC
GAGCTCGAGCTTCATCTTCAGGGTGATGTCAAGAAGACGAGCAAGAAGGTCACGTGGCTT
TCTCAGGACCAGGAGCTCGTGCCCTTGTCGATGTTCGATTTCGACTACCTCATCACGAAG
GACAAACCTGACCCAGACGATTCGCTTGAGGATATTCTGAACAAGAGCACCGAGACCAAG
ACGGAAGCGCTTGCTGACTGCAATGTGGCTGCACTCAAGGAGGATGCCATTGTACAGTTC
GACCGCAAGGGTTTCTTCAGGATAGACAAGCAATTCCAGCATGGAGATGCGGCCGTTGCT
TTCCAGATCCCAACGGGCAAGAAGATGTAAGGTGATGAGTTACATGGAAGAAAAGGCTTT
CAGGGTTACATGATGGGACGTGCTACGGTAGATTAGAAGATGAAATGATACTCTTGCTAT
GCATAACAGATGGCGCCCATCAAAACGCTTCTGCGCCTCTTGACAACAGAATCTCTGCTT
CTCATCCCCTCTATGCCAGGGTTATCATGATGTTTCATCGTATGGTGTTTTATTCAGACC
TTGAATGCCTGCGCTGGTGCCTCAGATTATGTAGATCTCCATTGAAGTTCAGCGGAACGC
TTGCTTGGTTTTACCATAAGAAGCAGATATCAAAGCAATGAGTCGAATCCATGTCAACGT
TGCGAAACCTCTGTGTAGTAGGTACAGCATTGAACCCGACGGGCGCTTTTACAGAAGCCT
CTATACATTTGAGAATCTTTCGGCTCAAGAAGAGTAGTAATCGATACCACTCTGCAGCGC
GTCGTCAATCTTCTTGACAACAGCCGTACCTTCCGCCTGACTCCCGGTCGTCTTCGCCAG
AAGAGCAGCGCTGAAGCTATCATGGTCGTACTTCAACAGCTTCAGGCCACCCAGGATAAC
AGGAACCATGTCTTTCGACTCAAATTCGGGTTTCTTGGACTTCAGGACCTCAACCGAGTT
CGGGATAGAGGCACCAACACTCTGGACCGTGTAGTCCACAATGGCCTTCGTCTCGGTCTC
GTTGAACTTGGTGATCCGCAGGTTGGCATCAGTGTAGCCTTTGCGGTTGGCGAGATGAAT
CGCGGTGATATCGCCGGCAATAGGAGCTTCGCTTGCGAGAGAGCCGTCGTACGC
>MATOU-v1_1284754
TCCCGTGGCTTCACTCATATTACCAGCCCGTCGGCGTATGATGCTCCAGACTTCGATGCT
GGTTTCATGAACGACAAGCGCGACATGGCTCCAATGGTCTGGGGATACATCAAGTCCCGT
GAGACTGCTCGTCGTATGGAAGCCTACGCTGGCGAAGTGACCGGAATGCATCCTTTCTAC
GCATACGACAGCCCCGCCCGTGCTCTGGACATGGACTTGGCCACCACAAATGCCTATGCT
GGACCAAACCACATCACCTCAGGCATCCAGCACGGCTCCTGGAGCATGCCAGTCGATTCT
GGAAAGCCACCGCAGCCAAGCATGCTGAACAGCAACCAGCAAGCTGTTCGTGATGACCTA
CAATACAGCAAGGAGGATCTCTTGGCGATTGAAGAATGGGTCAAGCGCCATGTTGAGACG
ACCTGGCATTCTCTGGGAACTTGCTCCATGGCTCCAAAGGAGGGCAACAGCATCGTCAAG
CACGGTGTGCTAGACGAGAGACTGAACGTCCACGGCGTCAAGGGTCTCAAGGTTGCCGAC
CTGTCAATCTGCCCGGATAACGTGGGCTGCAACACATACTCGACGGCCTTGCTGATTGGT
GAGAAGTGCAGCGTTCTCACTGCTGAGGATCTGGGGTACTCTGGTCGTGCACTCGATATG
AAGGTTCCTGAGTACCACGCACCACGCGAGATCACTGGTCTTGCACGGCTGTAAATGATG
GCTTTGATTGGAGGTTCGCAAGGTTGTTAGTAGTTCTATGCAGCTAATGATGTTGTGTAT
CTGCGTTCCTTATGAAGCTTTGGAAACACTCACGTACTTATTCCAATGAAATCAATGATT
GCAGT
>MATOU-v1_1284962
GTGGCAAAGCCGTACTTGCTGTCGTTCAGCACACTAACACCGTACCCGTGCTCGGAAAGG
TCGGCCCACTTGTGGCAGACGACCTCGAATTTGGCCATGTCCCAGTCGGTGTTGTAGTGC
GTCGGACGCCGGATGATGCCGTATTGGGTCTCGTATGAGGCTTCGGTGTTCATGATGGTG
GTGGGGAATTCGACCTTCAGGAACTTCATGGTCTCGTGCCAGTCGACTTCTGCTTCGGTC
TCGACCAAGGATGGCTTGGAGGAGTCATAGCTCGCTGAGAGGGAAACAGTCGTCTTTACT
GACGATTTCTCCGAGATCTTGTAAGAAGTGGTGATCGCGACACGGTGGGCGCTCTGCTCT
GTGATCTTGCTGGGAGAGGATGCTTCAAGCTCTTTGCGGGAGTTGAGATGATAGACTTCA
ACGTCCCATGCCTGCCAGTAGAGAGGCTTGTCATCGAATACAACAAGCTGATTGGCTTTG
CCGCCCTTTGGCAATACTTCGCGCTTGGCTTTGAGGTCATAGAGCGAAGTGATGACACCC
GAGCTGACCTCCACCTTGAGTTGCTCGTTTTGCAGCACATACACGTCGTCGCCAGTCTGC
TTGACAGTCACAGCTGGGCGACTCTGGTTCTGGATTGAGCGAGAGACATCTTCGCCGCGC
TTCCAACCAAGTGATTGCACAACCACGTCAGAAGCAACCTTCAACCCCGTCGCTCCATCG
TCAAAGCCCAAGGCGCCAAGTGCATTCTTGAGAAGTTTCTTACCCGTCGTGAAAACCTTT
GCGTATGCTTCATCGGAGTCGCGATAGCACATTTCGATCGCGCTTCCCGGCAGACAGTCG
TGGAATTGACAGAGAAGTACATTTTCCCACATGAAATCAATGTCCTCCTTGGGATACTTG
TACCCTTGATCGCCCTGGATGGTGGCAAGGGTAGCAAGATATTCGATGTCGTGAAGCAGT
ATCTCGGCCTTGCGATTGTTTTTCTTGTTATTGGCCTGGGTTGTATAGCAACCGCGGTGC
AACTCCAAGTACAATTCACCATACCAAGTGACCAATTGAGTGTCACCAGTGGCAGCACGA
TGCTCTAAGCGATCGAAGAACGCATCCACACTCTCCGGAATCTTTGCTGGAGGTAATAAG
CCCACGGTGTCGCTCAGGCCACGGCATCTACGCAGCTTCTCCAGCTGCTCAAAGGTAGGG
CCACCACCCCCGTCACCCTTTCCAAATGGAAGCAGAGATGTAGTATCTTGATCCATCGAT
TTGTGTTGAGTAACAGAGCGTTTCACATCACCAAAGTGCGCATCTGCAGTGTATGTTTCG
CACGGCGCCATGTGGCAGATCACCTGACTACCGTCCAAGCTGACCCAGTTGAAGGTGGTG
TGAGGGAAGTTGTTAATGTTGTTCCAGCTCAGCTTCTGCGTAAAGAAGCGGTTCATACCA
GCGAGACGACAGATCTGGGGGAGTTGTGTAGAGTAGCCGAAGGTGTCAGGTAGCCAGAAA
GTACGACAGCGTTCACCGAATCTGCTCTCGAAGTAGCGTTGGCCGTACAGGAATTGTCTG
ACAAGCGATTCGCCTGATGGCATGTTGGTATCGTGCTCTACCCAGCTACCGCCAATAGGT
TGAAAGTTGCCCTTCTTTACATGAGATTTTACACGGTCGAATGCGTAAGGATATAGCTGC
TCGAGCCACTTGTACTGCTGAGCTTGAGATGCTGATCGAGCCACTTGTACTGCTGAGCTT
GAGATGCCACGAATCTATGCTCAGGGTAGCGGTCGAGAAGGTCGCACTGGTTTGACCAAG
ACCTGGCGATCTTACGCTTAGTCTCTGCCCACGGCCACAGCCAGCAGGTGTCAATGTGAC
AGTTGCCGATTGCATTGACGATGGCGTCTGTCTCGGTCTTGTAGACACCCTCTGAATCAA
CTTTGTCC
>MATOU-v1_1284963
GTGGCAAAGCCGTACTTGCTGTCGTTCAGCACACTAACACCGTACCCGTGCTCGGAAAGG
TCGGCCCACTTGTGGCAGACGACCTCGAATTTGGCCATGTCCCAGTCGGTGTTGTAGTGC
GTCGGACGCCGGATGATGCCGTATTGGGTCTCGTATGAGGCTTCGGTGTTCATGATGGTG
GTGGGGAATTCGACCTTCAGGAACTTCATGGTCTCGTGCCAGTCGACTTCTGCTGCGGTC
TCGACTAGGGATGGCTTGGAGGAGTCATAGCTCGCTGAGAGGGAAACAGTCGTCTTCACC
GACGACTTCTCCGAGATCTTGTAAGAGGTCGTGATCGCGACACGGTGCGAGCTTTGTTCT
GTGATCTTGCTGGCAGAGGATGCTTCAAGCTCTTTGCGGGAGTTGAGATGATAGACTTCA
ACATCCCAGGCCTGCCAGTAGAGAGGCTTGTCGTCAAATACAACAAGCTGGTTGGCTTTG
CCGCCCTTTGGCAATACTTCGCGCTTGGCCTTGAGGTCATATAGCGAAGTAATGACACCC
GAGCTGACCTCGACCTTGAGTTGCTCATTTTGAAGCACATATACGTCGTCCCCAGTCTGC
TTGATAGTCACTGCTGGCCGACTCTGAGTCTGGTTCGAGCGGGAACTATCTTCGCCGCGC
TTCCAGCCAAGTGTTTGCACAACAACATCAGAAGCAACCTTCAATCCCGTCGCTCCATCG
TCAAAGCCCAAGGCGCCAAGTGCATTCTTGAGAAGTTTCTTACCCGTCGTGAAAACCTTT
GCGTATGCTTCATCGGAGTCGCGATAGCACATTTCGATCGCGCTTCCCGGCAGACAGTCG
TGGAATTGACAGAGAAGTACATTTTCCCACATGAAATCAATGTCCTCCTTGGGATACTTG
TACCCTTGATCGCCCTGGATGGTGGCAAGGGTAGCAAGATATTCGATGTCGTGAAGCAGT
ATCTCGGCCTTGCGATTGTTTTTCTTGTTATTGGCCTGGGTTGTATAGCAACCGCGGTGC
AACTCCAAGTACAATTCACCATACCAAGTGACCAATTGAGTGTCACCAGTGGCAGCACGA
TGCTCTAAGCGATCGAAGAACGCATCCACACTCTCCGGAATCTTTGCTGGAGGTAATAAG
CCCACGGTGTCGCTCAGGCCACGGCATCTACGCAGCTTCTCCAGCTGCTCAAAGGTAGGG
CCACCACCCCCGTCACCCTTTCCAAATGGAAGCAGAGATGTAGTATCTTGATCCATCGAT
TTGTGTTGAGTAACAGAGCGTTTCACATCACCAAAGTGCGCATCTGCAGTGTATGTTTCG
CACGGCGCCATGTGGCAGATCACCTGACTACCGTCCAAGCTGACCCAGTTGAAGGTGGTG
TGAGGGAAGTTGTTAATGTTGTTCCAGCTCAGCTTCTGCGTAAAGAAGCGGTTCATACCA
GCGAGACGACAGATCTGGGGGAGTTGTGTAGAGTAGCCGAAGGTGTCAGGTAGCCAGAAA
GTACGACAGCGTTCACCGAATCTGCTCTCGAAGTAGCGTTGCCCATAGAGGAACTGTCTG
ACAAGCGACTCACCCGATGGCATGTTGGTATCGTGTTCTACCCAGCTACCACCAATAGGT
TGAAAGTTGCCCTTCTTTACATGAGACTTTACGCGGTCGAATGCGTAGGGATACAGCTGC
TCGAGCCACTTGTACTGTTGAGCTTGAGAAGCGACAAATCTATGCTCAGGGTAGCGATCG
AGAAGGTCGCATTGGTTCGACCAAGACCTGGCGATCTTACGCTTGGTCTCTGCCCACGGC
CACAGCCAGCATGTGTCGATGTGACAGTTACCTATTGCGTTGACGATGGCATCCGTTCCA
GTCTTGTAGACATCTTCAGAATCGACCTTGTCACCGAGATACTTCTTCGCGATCTTGCGA
CAATCCTGAATGCATGATCTGGAGCCCTCGCCTGCTATGAAGCAGTCCATAATCTCATTG
CAGACTTGAAGTGCCTGGTGTTCCTGCCAGCTGTCGTCTGGGAACTCGCGAGCGCCGTCA
CC
>MATOU-v1_1285373
CTGGGCTCGTTGTTGGGGTCGCGATACCATGATTGCCATGCGTGGCTTGCTGTTGTGTAC
CGGTCGTTTTGCTGATGCCAAGGAGCACCTATTGTGCTTTGCTAGCTTGGTCAAGCACGG
CATGATTCCCAACCTGCTTGGCTCCAGCAAGTTGCCCCGATACAACAGCCGCGACTCTGT
CTGGTTCTTCCTTCAAAACATCCAAGACTATGTCAACCTGGTTCCTGGCGGCTCGAAGAT
CCTTCAAGAGAGAGTCAAGCGCCGCTTCCTGCCCTACGATGATACTTGGTTCCCTTGGGA
CGACAAGCGTGCCTACAGCAAGGACAGCTCGGTTGAGGATGTCATTCAGGAATGTCTGCA
AACCTTGGGACGACAAGCGCGCCTACAGCAAGGATAGCTCGGTTGAGGATGTGATTCAGG
AATGTCTGCAAAGGCATGCTAGCGGCTTGCACTTCCGAGAGTACAACGCTGGATCCGACC
TTGACATGCAGATGAAGGACGACGGTTTCAACATTGACATCGAGGTGGACTGGACCAACG
GCATCATTTATGGTGGCAACGAGCACAACTGCGGCACCTGGATGGACAAAATGGGCGAGT
CCACCAAGGCTGGCAACAAGGGCGAGCCGGGTACTTCCCGTGATGGCGCGCCAGTAGAGA
TAACGGGTCTGCTGTTCAGCGCTCTGAAGTGGGTCGCCGACCTCAAAGCCTCGGGCCACT
TCAAGTATGACGGCGTCACTTCCAACCAAGGCAAGCTGGTCACTTATTCAGCCTGGAGAG
ACCTGCTCAAGGCCAACTTCGAAAAGCACTACTACGTCCCTGCAGACCCGGCCGAGTACG
GCAAGTACGACATCAACCCCAAGATCGTGAACCGCAAGGGCATCTACAAGGACGTGCACC
GCGGCCGCAAGGAGTACAGGGACTACCAACTCCGGCCCAACTTCTGCATCGCCATGGTGG
TGTCGCCGGACCTCTTCGACCCCGCGCACGCCCTCGGCGCCGTCGAGATGGTCGACAAGT
ACCTCCGCGGTCCGACTGGTATGGCCACGCTGGACCCCGGCGATCTCGAGTACCATCCAG
ACTACCTCAACTGGGACGACAGCGACAACTTCCAGACGGCAAAAGGCCGTAACTACCACT
CCGGCCCGGAGTGGTTGTGGCCCACGGGCTTCTTCCTCCGCGCCATGCTCAAGTTCGATC
TCATGCGCCGCAAGACCAAGGAGGAGCGCGTCGAGGCGTTTCAGCAGGTCACGCAGCGCT
TGCATGGGTGTATGGAGATGATCCGGGAGTCTCCCTGGGCGGGTCTGACGGAGCTCACGA
ACCGGAATGGTTCTATGTGTGATGATTCGTGTCCCACCCAAGCCTGGTCTGCAGGGTGTA
TAATAGACCTCTACGACGACGCCAGCAAGTACAGCCTGGATGGTTCGCACTGAGGGTCTC
TTTCCACCGACCCGAATCTGAGCAGTGTGTTTCTCCTCTTGAGCGAGGATTCTCGTCTCC
TCGGCTAGGCATGGAAGGGTTTGCTCCACCGTACGACAGTAAGAGGAGAGGGAGGGGGGA
CCGCTACGTTGATGTTCTTTTTTGGGGAGGGGGGTGGTTGAGGTGGCGGAGGTGGGAAGC
GGGCTAGCGGTGATTGTGTTGGTCCCTGAGGATTGGAAGAGTTGATCTTGTTTTTGATAT
CCTGTGTAGCGTACCTAGCCGCTCGCGTTTTTCTGTTGAACCTAGAATAATACGTATCCT
GT
>MATOU-v1_1285818
GACCCATCTGCGAAGCTGTCGGGTGACACCCCGCGAGCCAAGTTCACCAATGTGTTTTTT
AGTGAAATCATTGGTCCTCTTGTCTTGGTCGGTGTCTCGCTGATTCCTTACCTCTACATC
AACGCTGGTACTGGTGTTGTCGACCGCATCCAGGAAGATGGTGTGAACCCGGAACCGACG
AATGCCCTCATTCGTATCGCTATCGTCGCCTTCGGTCCCATCGCCGTCAATGCCGGTGTT
GCTGGTGTCTTCTTCGGTATGGCTTGCTGTATGGGCCCTGTCTTCAGCATGTGCTGCAAG
AAGTTCGGTGCTGTACTCGCTGCTATCGCTCACGCCATTGCCGTCATCGCGCTCTTTGCC
TTCTTTGAGGTCATGTATCTCTTGGAAGGCTGGAACTTCACGAAGACTCTGCTCGGGATG
ATCGCCTCTGTTGCCATCCAGCGATTCATTTCGAAGTTGATCGTCGCCACGGCTCTGACC
AGAGAATTCCGCGCCGACACCTCCAACGTGGCATGGTGGACTGGCAAGTGGTACTCGCTT
GGATGGCACTCGTTCTCCCAGCCGGGCCGTGAGTTCCTGTGCAAGATCACCGAGATGGGC
TTCTTCGCGGGTGACTTTGTCTTGGGTCACTTCATTCTGTTCTTCTTCTTGCCAGTGCTG
CTCATCCCGTACATCGACAAGTTCCACTCTGTCATGCTCTTCTGGCTGCGCCCTAGCCGT
CAAATCCGCCCGCCAATCTACTCTCTCAAGCAGAGCAAGCTGCGGAAGAGACGTGTCGTC
CGTTACGCTATCCTCTACTTCTCCCTCTTCGTTCTCTTCCTGATCCTCATGGTTGCTCCT
ACTGTCGCTAGGCAGATGGGTGTCTCCGTCTCCCTCAACATTATGCAGCTCCAGCAGCCA
ACCGACTGGAAGAACAACGACACCCTCGGCTCTAGTGATACCGGAACTGCTCTGGGCACC
GCTGCCGCAACTGGCGCTAGTGCCTCGGCCTCAGGATCAGCTGAGAGAATGAGAAGGGCG
TACTTCTACTACGAGTCGTAAACGGCGCGCCTAACGGCCCAAATGAGCTTGACTCCACCC
AGCTCAAGAATGACATTCTCTACGATTTGTAACAACAACAATATTTGAAGCGATAAAATA
AGAAAAAAGACCGCATGCATGGAAGCGTGGCAGGAATAATGAGAAGGAGGTGTAATTCCT
TCCCCGAGGCATTGCATTACCCGGGCGCATGTCTTTTCTTTGCTTGCCTGTTTTTGTGCC
CTGAGAGCTTCGTCTTTATTATACAGCAAGGGAGGGGGAGGAAAGGGAAAGGAGTTATTT
TGGGGCTGTTCTCAAATTTGATAGATTAAGGAAACGGAACAAGACAATTCGAAAAGATGC
AAAATCAAAGAATGGAGATTCTGTCTGTGTACGTCTTATTATTGAGGGACTCTCCGTCCC
TGTGCAAATGTATATCTTTTCAACCC
>MATOU-v1_1286678
TACTGGCTTCCGCGATCCATTCTTTGAGCCTTGGCCGGCGATGGATCAGATTCTGGGTAT
GCACGAACCGCATTACTACGCTGTCTTTGGCTCGGGTATCAAGGGTGTCGGGCCACGAAT
GCCACTCTGGAGTGCGCCAGCCAGCGATCTCACAGATTGGACGTTCCAGGGAGCACTGTG
GGAGCCGGCCGCCAACACTTCTCTCGGCCCAATCATCTCTACGGCTACGTACGGTTTCAA
CTTCGAAGTCAGTGGGTTCTTTAGCCTGCCTGACTGCGATGGAAACCTGCACTACTACAT
CAACATGGGCACCGAGGGCAACAACTTGACATTCCACCCGAGCAACCACTGGGCCCTGTG
GAACGAGGGTATCGTCAGTCGCCGCGAGAACGGAAGCGCAGAGTTCACTCCGATTGCAGG
TGGCGCGGCCGACTGGGGTCTCTCATACGCTCTGACCAGCTTCAACGACACGAAGAACAA
TCGACGCGTGCAGTGGGCGTGGGCACCCGAGGACCTGGTCGGTGACAGTGGGCTGTTCAG
CGCCAAGCAGCAAGGTTTCCAAGGATCTCTAGCATTGCCCAGAGAGCTTTTCGTGCACGA
GACAAAGGGAGTTATGAACGTCAACGGCAGCGTTGCTTACTCGCGTGAGGCTACCCTGGA
ACACAACCAGGATGGAACGTTCAAGGCGACTACGCTCGGCATTAAGCCGTTGGCCGACGT
TGTAGAGGGCCTCGTCGCCAATGCCTCTCACAAGGACTTCGAAGTCGGCACTGTCTCCAG
CTCAAAGGTCATCCAACAAGAAGGCAGCGCGCACATGGAGCTAAAGGCATCGATCACCTC
TGCCACCGGTGCTTGCGGCCTCATCATCGGCGCATCTCCCGATATGACCGAGTACACCAC
TATCTCCTACCAGCCCACCAACAACACCATCATCGTCGACCGCTCAATGAGCAGCACCAT
CGACGGCTTCAACAACGCCTCCGTCACTGGCTACTTCCACCCGTACACGATCCGTCAACA
CGACGGCTCTTCCAAGCAAGAAGCCATCAACATGGACGTCTTCGTCGACGGTTCCTTAGT
CGAGATCTACATCAACGAGCG
>MATOU-v1_1286870
CATCAATCATTCTATTTCATTTCATGTACTACATGTCATCATCAATTGCCGTAGAGGCTC
AGCCTGGTGAAGCCAGGCCATTCTATCTACATTTCCACTTTCTCCAAGGCGTCATGCTTC
AATCTAAGCCAACTTCATCGAGAACTTGCCCGTGAGTGGCACGTCCGTGTGCAGCACCAG
CTTTTGGTTCTCACTGTCGTACTCAGCACCCTCCATCTCATCCGAAGGTGCCTTCTCAAA
ACCAAGCAAAGTGATCATCTCAACCGAAACGCCAGCATCGTAGTCGAAGCTGCCAGTCAT
GCTGAATTCGCCGTCTTTGTAGGAGAACTCAATCTCGGAGATCGCTTCCTGGGAGAGCGA
CTCGCCATCGTCCAGATACAGCTTTCCCGAGGCAGAGCCATCAAGTCCGGGCGCGATTAC
AACGTTGAAGCCCTTGTTGCGCAGATCGTACGTGGTCATGGCGCTCTCAACGCGCTGAGG
GACAATGCTGCCACCCTTGTAATGAACCAAGATCTCGTCGAACGGCACCTCGGCGTCAAC
GTAGGCTCCTTCCCCGCGAACGGGCTTTCCGCTACCCCAAGCGTAGAAGATGTCGTCTGG
AAGATAGAAGCTAACACTGGTGGAGTTCTCTTCCGTCACAGGGCTGATGAGCATGGAGTC
ACCGTAGAAGAATTGGTAGTCAATCGCGAAGGTGTTCTCGTCCTGTGGGTAGTTAAAGAA
CATTGGGTTCAAGCATGGAGTACCAGTCTGGTTCTGCTGGTAGATAGCAGTGTACATGTA
GTCGAGCAGCTGGTAACGAATGCTAATGCCGTTCCTGGCAGCAGAAGCAGTTACGGGCCA
ACGGTAGAACTCTTGGTAGATGGAGTCGATGTCGGCGTGGTTTCTCATAAAGGTGGAAAA
GCTTCCGAGAGTCGCCCATCTGGCGCAAAGAGTAGAGGTGACGTTGCCGCCGAATCCGCA
AATGTCACCACCGACAACCGGAAACTGGTAGAGGGATGCGAATTGCAACAGCTGCGAGAT
CTGGAATCGGTACTGTGCCCACTCCGAAAGATTGTCACCGAGCCAGTGCGAAACATCTTT
GCCGGCTCCGGCAAATGTGCTTCGTGTAATAACAAGAGGTCGCACATCTGGCCTACGGGC
CAGCATGGAGTTGTGAGAGGCGGAACTCATCATGGCGCCGTAGAGGTTGTGTACGTCGTA
CTCAA
>MATOU-v1_1287665
GACGCGACCATGTTCTACTTCGCAGGCTTTTCGCTGCTCAGCCTTCTCACTGCGTCTACA
CTAGCAGAAGTGCGATCCTTCAATTTCACTGTCCACGAGGGGGAAGCAGCGCCAGACGGC
TTCTCCCGCCCGGTGTATCAGATCAACGGTCAGCATCCTGCCCCGCTTATCGAAGTCGAG
GAGGACGACACCCTAGAGGTTTTCGTGAAGAACGACCTCCCTGTTGAAACTACTATCCAC
TGGCATGGCATCCTTCAACGAGGAACACCGCACATGGATGGTGTGCCTGGTGTTACCCAG
TACCCTATCGCCCCCGGAGGCAACTTCACGTATCGATTCGATCTGACAAACGAGTACGGT
TTCTACTGGTATCACTCTCATTTCCGCGCCTATTACAATGATGCCATCCGCGGGCCTTTA
TACATCCGCCCCAAGCGATCCCGCTCCCGCCCGTTTGAGTCGCTCGCCTCGAGTGACGCC
GAAGTCTATGCCCTACTTCAGGCGGAGGAGGATGCTTTCCCGGTCCTTTTTACGGATTGG
TATCATGAGGTCTCTGATATAGTCTTGCGAGAATACAACCGCACCGGTGTGTTTCCGCAT
TGCGTGGACAGCCTGCTTGCCAATGGCATGGGCAGAGTGCAGTGCTTGCCGCAAGCAGTC
CTGGATTGTGGGCCAAACTTGTGCTTAGGGCCTGATGATTCTAGCTCGATGTCCATGGAA
GCCTCCGACACCACGTCGATGTCAATGGCATCCTCTGACTCAGCTCCGATGTCCATGGCG
CCTCCTGACAACGCCGAATCGTCCAAGGCATCTTCTGGTGCATCGATGGATATCACGTCG
ATGGATTCCATGGCGGATAGAGCATCTGCAACCGGCGAAAAGTCAATGACAACGTCAGCA
CCGTCGACTCCCACCGCGCACCCAATGCGACAGCGAAAGAGACAGATGGTGAATATGTCG
AGCACGGACATGTCCCTTGGTCCTCGTGGCTGTATGCCGCCTACAATGTTCAGGCCTGGC
TTTGATTCAAGCGACCTCCCTCTAGAGACCTGCACTGAGACCGCAGCGCCTTTACTTACG
ATTCCCGCGAACTCCGCTTCAGGCTGGCTGGCCCTCAACCTTGTGAATGCTGGTTCAACC
ACCAAGTTGACCGTGTCGTTGGACTCCCACAAAATGTACGTATATGCGGCAGACGGACTC
TTTGTCAAAATGCAAGAGGTTGAGGTATTGCCAATGAGTCTTGGCGAGCGCTACTCAGTG
ATGATCAAGCTTGATCAGACGCCAGGAGAGTACGCTCTCCGGTTCGCTTCAATTCCCGTC
GGGGATATGCAACAGGTAATCGAAGACCTCGCGATAGTACGTTATGTGAGCGGCGTCAAT
GACAGCTCTATGGGTACTATGGAATCACCTTCCAGGTCGAAAAACAATCACACCATGTCG
ATCCTTGGAGAAGACACGATTGATGCTCACATCCTGGTGAATGGCTCTGCTAAGCCGACA
GCGTCCACTCTACGGCCGCAGAATCTTGGGCCCTTCGATGTCATTGCCCCTCCACGCCAC
AACAACGTCGCGACGAGGGTCCTCGACATCAACCAAACCGGAATAGTCTCCTGGGTCGTC
GACAGGTACTCTTATTCTGAGCCCAAAGTGCCAGTGATCTATGGGAACATTTCAGACGGA
TGGACTGCCAGCACCACAATGTTCATGCCCTTCAACACAACAATCGATCTGATCATGAAA
GTCGCCCCTGACTCCATGGACACGATGGGCCATCCTATGCATCTCCACGGCCACAAGTTT
TGGATCCTGGGCACCGGTGAAGGGGCATTCCCGTACTCATCAGTCCAAGATGTGCCAAGC
TCGCTAGTCAATTTGGACGACCCTCCCTACCGTGACACGGTTGAGCTGCCTGCCTCAGGC
TGGGCAGTCGTACGATACGTTTCTGACAATCCGGAGCGGGATGGCACTAGTGCTCGTGGA
GGGAGAAGATCGTTTCCCTGCTCAACTCGAATCTACTAACATGACGGGGTCTGCGAATCC
GAGCAACAACCTCACCTCGTCGTCCGCTACCGCCGTTCCATCGAGCTCTTCTGCTTATCT
ACTAGCCCCTGGTCTTCAGCTCTTAGAAGCGGCTGTGCTTTCCGCTTTCTCCGTCTTGTT
GATGTGAATTGCTGGGGCTCCGGCCGCGGGGTTGGGTGCATGATTCATGATCCATAGCTC
ATGGAGAAGGAGACTAGAGGAGCAAGCTGTTCCGTCTTTCGCTCGTCTGCGCAGTGTATA
TATGGTCACATACTCTTGCGAATAGCTGATCCTTTG
>MATOU-v1_1287666
GACGCGACCATGTTCTACTTCGCAGGCTTTTCGCTGCTCAGCCTTCTCACTGCGTCTACA
CTAGCAGAAGTGCGATCCTTCAATTTCACTGTCCACGAGGGGGAAGCAGCGCCAGACGGC
TTCTCCCGCCCGGTGTATCAGATCAACGGTCAGCATCCTGCCCCGCTTATCGAAGTCGAG
GAGGACGACACCCTAGAGGTTTTCGTGAAGAACGACCTCCCTGTTGAAACTACTATCCAC
TGGCATGGCATCCTTCAACGAGGAACACCGCACATGGATGGTGTGCCTGGTGTTACCCAG
TACCCTATCGCCCCCGGAGGCAACTTCACGTATCGATTCGATCTGACAAACGAGTACGGT
TTCTACTGGTATCACTCTCATTTCCGCGCCTATTACAATGATGCCATCCGCGGGCCTTTA
TACATCCGCCCCAAGCGATCCCGCTCCCGCCCGTTTGAGTCGCTCGCCTCGAGTGACGCC
GAAGTCTATGCCCTACTTCAGGCGGAGGAGGATGCTTTCCCGGTCCTTTTTACGGATTGG
TATCATGAGGTCTCTGATATAGTCTTGCGAGAATACAACCGCACCGGTGTGTTTCCGCAT
TGCGTGGACAGCCTGCTTGCCAATGGCATGGGCAGAGTGCAGTGCTTGCCGCAAGCAGTC
CTGGATTGTGGGCCAAACTTGTGCTTAGGGCCTGATGATTCTAGCTCGATGTCCATGGAA
GCCTCCGACACCACGTCGATGTCAATGGCATCCTCTGACTCAGCTCCGATGTCCATGGCG
CCTCCTGACAACGCCGAATCGTCCAAGGCATCTTCTGGTGCATCGATGGATATCACGTCG
ATGGATTCCATGGCGGATAGAGCATCTGCAACCGGCGAAAAGTCAATGACAACGTCAGCA
CCGTCGACTCCCACCGCGCACCCAATGCGACAGCGAAAGAGACAGATGGTGAATATGTCG
AGCACGGACATGTCCCTTGGTCCTCGTGGCTGTATGCCGCCTACAATGTTCAGGCCTGGC
TTTGATTCAAGCGACCTCCCTCTAGAGACCTGCACTGAGACCGCAGCGCCTTTACTTACG
ATTCCCGCGAACTCCGCTTCAGGCTGGCTGGCCCTCAACCTTGTGAATGCTGGTTCAACC
ACCAAGTTGACCGTGTCGTTGGACTCCCACAAAATGTACGTATATGCGGCAGACGGACTC
TTTGTCAAAATGCAAGAGGTTGAGGTATTGCCAATGAGTCTTGGCGAGCGCTACTCAGTG
ATGATCAAGCTTGATCAGACGCCAGGAGAGTACGCTCTCCGGTTCGCTTCAATTCCCGTC
GGGGATATGCAACAGGTAATCGAAGACCTCGCGATAGTACGTTATGTGAGCGGCGTCAAT
GACAGCTCTATGGGTACTATGGAATCACCTTCCAGGTCGAAAAACAATCACACCATGTCG
ATCCTTGGAGAAGACACGATTGATGCTCACATCCTGGTGAATGGCTCTGCTAAGCCGACA
GCGTCCACTCTACGGCCGCAGAATCTTGGGCCCTTCGATGTCATTGCCCCTCCACGCCAC
AACAACGTCGCGACGAGGGTCCTCGACATCAACCAAACCGGAATAGTCTCCTGGGTCGTC
GACAGGTACTCTTATTCTGAGCCCAAAGTGCCAGTGATCTATGGGAACATTTCAGACGGA
TGGACTGCCAGCACCACAATGTTCATGCCCTTCAACACAACAATCGATCTGATCATGAAA
GTCGCCCCTGACTCCATGGACACGATGGGCCATCCTATGCATCTCCACGGCCACAAGTTT
TGGATCCTGGGCACCGGTGAAGGGGCATTCCCGTACTCATCAGTCCAAGATGTGCCAAGC
TCGCTAGTCAATTTGGACGACCCTCCCTACCGTGACACGGTTGAGCTGCCTGCCTCAGGC
TGGGCAGTCGTACGATACGTTTCTGACAATCCGGGTGCGTGGCTTCTTCACTGTCATTTA
CAGTGGCATCTTTTGAGCGGGATGGCACTAGTGCTCGTGGAGGGAGAAGATCGTTTCCCT
GCTCAACTCGAATCTACTAACATGACGGGGTCTGCGAATCCGAGCAACAACCTCACCTCG
TCGTCCGCTACCGCCGTTCCATCGAGCTCTTCTGCTTATCTACTAGCCCCTGGTCTTCAG
CTCTTAGAAGCGGCTGTGCTTTCCGCTTTCTCCGTCTTGTTGATGTGAATTGCTGGGGCT
CCGGCCGCGGGGTTGGGTGCATGATTCATGATCCATAGCTCATGGAGAAGGAGACTAGAG
GAGCAAGCTGTTCCGTCTTTCGCTCGTCTGCGCAGTGTATATATGGTCACATACTCTTGC
GAATAGCTGATCCTTTGaaaaaaaaaaaaaaaaaaaaaaaaaaaaaaaaaaaaaaaaaaa
aaaaaaaaaaaTCAAATTGCAACGGTGCAAACGCATCGCTGAAGATGACAAAATGAG
>MATOU-v1_1288211
GGCAGACATTGGTTTGATGAGCGATTACCATTATCCATCAATTAACCTCCAGAGAAAAAA
GATTTCATTACCTTCTCATCATTCAATGCCCCTGTCCCAGTAAAGACCTCCATCCAAACG
ACCCGATCGGCCAGCTGCAAACAAACACCCTTATCTACAAGCCGTAACGATAAACGGGAC
CTTCTCCTCCTGACCCCATAATCTCTTTCATCTCTTCGACTTCCATCCCCAGCTTTACCT
CCACCCCCACGCGCGACCAGAATATTGATATGCAAGCAAGCCAAAAGAACGCCCGATTCC
TTCCTGTCCTCTACTCGGAACTGCTGCTAAGAGCAGTATGAAATGCCCTTTTTTGATTGC
CCAAATGGTACTCTCCCCGGATGCAAAACAAGGACGAGATTTGTGTACATCAAAACTTGG
GATTTTCTTCCGTTTTCCTCGTTGTATGCAGGGAAAACGCGTTACAAGGAGTGTGTCGTT
CCATCTGTAGAACGTGTGCGTGGACGCGGCCAGCTCAGCGGAGTGAGGATACCGTCAAGC
TCGGCGTTTTGCGTCGTGATTTGCTCCGCATAGTCCAGTATCTTGAGAAACGTTGGCAAT
TTCCTCTCCGAGCTTCGAATCGAAATCCCTGGCCATCATAGGCTTCGATTCTTCAGCGAC
CTCGAAGTGCCTCAGCGTGAATGGCGGCGAGACCTTGTGAAGTCGTCGCCCACTCGGCAT
TGGGGCGTCGTTGTCCGGCAGTCGATAACTCGCCGAGAGTTCTATGAGTTACCGTTCCCA
TTCTCAGTTCCAGCTGAGCATCCATTCATCAACGTGTTCTTCGGCCACGAATATCCAGCG
TCCTCCCAGTGAGTGTAGTTGACATTGTTGTACGCGGCAGGGTGGTCGCGGATATATTCA
GTCGTCTCGTAACCCGGCGGATCACACGTTACCATTTCCTCGCCCTCCTTCTGGTACCAT
CGCACGTAGTCGATGTACATGTCCGTAGGCCAGTAGAGCTTTTCCCACTCGACAGCGACC
CAGTTTTCCGAGAAGCCCAGGTTCATGATTAAGCTCATGGGTTCCTCAGCGATCAGACGC
TGTCCGACGTTGCCGTTTGGTCCGATCGCCCGGGCGTCGAACCGCATCATCTCGACGTCG
CCGATGACCCAGGCAATGTAGGCGTCTTCGCCATCACCAGGCACGTACTCGAACCAGTAC
TTTTGGAATTGCTTTCCATCGTACCAGTCGTTGCTCAGCATACTGGTGGTACTTACAGCC
TGCTGGAACGGCCCACCAGTGTAAGTGTTCACCATGGAAAACTCATAAGACGGTGTTTGC
ATGAACTCGTAGTTGGGGTACCACCAAATGTCGAAAGGCGCGACCTGGAAACTCTGCGTG
GCCACACCAGCGTTCATTCCACCCCAGTCGGCCGAGACCTCGATGATGTCGATCTCAGGT
GCGCCACGTCCTTTTCCAGGTGTCGGATGCTCTTCACCATCGCAGGAGCAGCTTGGCAGT
CTCTGGCCCGGCAAGTAAGAAACGCCGTCGGTCATAGACTGATTCGGCGTAATACCAGCG
TCGCAGTCGTTGTAGGTATAAGGCCACATTCCGTCTGTCGTGGCTAGGTAACCAGGCCTT
CCCAAGTTGCCCATTGTCCATACACCAGGCCACCAACCGTGTACGCCCGCAGGTCCGGGC
AGCGAAACAGAGACCTCGAAAATACCGCCCTTGAAACACAGGTGGTTCCAGCTGTGCATC
ATACCTGAACGATATTCCATGTTGTGGTTATGCTCGACGTCTTGAACCTTGTCGAGATGG
ATTTGGAGTGTACCATTTCCAGTGTTCAGCGCGTCTGGGTCATACCATTCCAGATCCATC
GTAGCACCATACCACCCATCGAATCCGTAGAAGTATGGGTCATCACCCTCGTAAAACGTT
CTATTCTTTTCATTGAATTCGTCACTGAAAACCAGCTTGTACTCATCGCCATTGACACCC
TTCTTGGTTTTGGCGCTGCCAGGGGTATCGGGATCAATGAGGCCAGTCCGCACATTTTGG
AGGTGCGAATATGTCTTGTTGTTCACCTGCGCCCATGATTCAGGAACGTACCTATCGTTC
TTCGGCATCTGATCTAAAGGTGTCTCAAAGGTGTAGTCGAGGAATCCTCTCGTGGTATAT
GATACCACCGGCAACACTACAAAAACGCACAGGAGGCCAATCGTCATCAGTATCATTCCT
ATTGTACTGGCAAAGTTGTCCTTTGTAAAGTGGTCTTTGAACTTGGGCCTTAGTCGAATG
TCATCGTCCCATTGTGGCATGTGAAGATCGTCATCGTCTTCTCGCTGGTCAGAGAAAAGC
GGGAAATCGTATGTCGGTGCTCCTAATCTGTCGTCCATCCAAGGAAAGAAGCCAACCTTT
TCGGGGTCGGCATCGTTTATCCACATGGGTGTTCCATGGCCAGCTGAAGATGCACCAGGC
ACTGCCATGGTGGCGGCGGCCGCACCAGCCTTCTCGGGGTCGGGACTACCGTTCCGCGTA
GTGGGTGCAGTGGTCTGCCGTGATT
>MATOU-v1_1288682
CTGACCAATGTCACCGTTTTCGATCCGCCGGACAATTACACTGTCCCCCGTACGTTGTAC
GCCCGTGCAATGGCACTCGACTGCAGCGATACTCTGCTAGCGACCTGGGAGAACTACCTG
CCTACTGCGACCCCAGAGGAGGCATGTCCGAACAACTGTCCGGAGAATCCGTATATTCCC
ATCTATCAATCCTTCGATCAGGGAGAGACGTGGTCTGAGAGAGCCAAGGTCTACGACCAA
GTCAACGGATGGGGGCTGCGGTATCAGCCGTTCCTCTACGAGATGACCGAGGACATCGGT
GACTTTGCAGCCGGTACTCTCTTGCTAGCAGCGAACAGCATCCCAGCCGATCTTTCCGAG
ACCAAGATTGATGTTTATGCTTCAGAAGACGAAGGATTCACATGGAGCTTCGTATCCAGC
GTTGCAAGGGGTGGTGAAGCATTACCAGAGAACGACCTGGAACCGGTATGGGAGCCATTC
ATGCTCATCTACGAAGGCCAGCTGGTTCTCTACTACTCCGACCAACGCGATCCGGATAAC
ACTCTTGGACAGAAGATGGTACACCAAACCACGACCGATCTTCTCAACTGGGGCCCGATT
GTTGATGATGTCCATTACGATGACCCCACTTTCCGTCCTGGCATGCCCATCATCTCCGAG
CTCCCGACAGGAGACTGGATCTTGACGTACGAATTCCTTGGAGCTGAAGAAGGGGGATTT
CACGTCTACTACCGCATCTCGGATTCGCCACTTACATTCGACGCACAGCCTGGCATTCCA
ATTTTGCCGGCTGACGGCTCGAGCCCTGAAGGCTCACCATACAACGTCTGGACGCCAGCG
GGTGGAGAAAACGGAACTATCGTTGTGAGCGATGGGAACCATACGCCGCTGTACCTTAAC
CGTGCGCTTGGAGCTGAAGATGCGTGGACGACGTTGGAGGTACCTGCTGGCGCGAGCTAC
ACTCGGTCGCTTCTCGTGCTTCCCAACGATCCGTCCAGGATCATGATTGTTGCTGGCGGT
GTGCTTGGGGGAGAAGATAACTCCGTACTTGTGACCACCATCGACCTGGAGGAGGAGAAT
GGAAAGGGAAATAAGTACGGTCACCGAAAGCATGGGAAGGCTTGCTGGGGTAAGGGTAGG
GGCAGAGGTAGAGGCAAGGGTAAAGGCCACGGCTGGTAGATAGCCGATATGTGTTGAGAT
GCAGAAACCTCAATGCAGTCTGAATGACCTTGTAAATACCCGAGGGTAGAGATATTTCAA
TCCTCTG
>MATOU-v1_1289269
GTATTGCAGATCATGAGGAGCCCGACCAGCGTCAAGCTACCTGGATCAACCGCCCACAAG
TACGATGATATGATCCGGGACCCAAACTTGGATGAGACCCATGAGCCCCCGGAACCGCTG
CGTCGAGTTGAGGGCAACAATTACGATGCCGACAACCCAAACAGCGATCGTATAAATGCT
ACTCTCCTGTCGCTAGTCCGCAACAAAGAGCTTCAGCAATTGGTCATGTCCATGAAAGAT
CTAGAGCGGACATGGAATCACAAATTCAACTACCCGTGGACCTTCATCAACGACGAACCG
TTCACCGAAGAATTCAAGACAGTCACGCGGCGGCACACAAAAGCTCAGATCAACTACCTC
GAGATACCGAAGGAGCATTGGGAGGTTCCGTCATGGATAAACCTAGACCTTATGCATGCC
AGTGCGGACATCTTAGAAGAGCAGCAAGTGCAGTACGCGCATCTAGAGTCTTACCATCAG
ATGTGCAGGTGGAATTCCGGCATGTTCTACAAGCATCCGGGGCTGCAGGAGTATCAATAC
TATTGGCGAGTCGAGCCCAACGTCCACTTCTTTTGCGACGTCGACTACGACGTCTTCCGA
TTTATGAAGGATCACAACCAGACTTATGGGTTCACAGTGAATCTCTACGACAGTCCAGAG
TCCATCTCTAGCCTGTGGCCGGAAACTGTCAAGTTCCTTGCCTCGAACAGCCACCTGCTT
CATCCGAATAATGCCATGGGCTGGCTCACTGACAAAGAGCGCCGACCGGAACACAACTAC
AAGGCCAACGGCTACAGTACGTGCCACTTCTGGTCCAACTTCGAAATCGCGGACATGGAC
TTCTGGCGTTCGCCAGCCTACGAAGCCTACTTCGAACATCTAGACCGAGCAGGAGGGTTC
TTCTACGAGCGCTGGGGCGATGCGCCCGTCCACTCGATCGCACTAGGGCTGTTCGAAGAC
CGCGATCGGATACATTGGTTCAAAGACATCGGATATCAGCACATCCCCTTCTTCAACTGT
CCGAACAGTCCGAAGTGCAAAGGCTGTGTCAAGGGACGGTTCACGGATGGAGAGGCCTGG
CTGAACAAGGAGGACTGCAGGCCCAACTGGTTCAAGTACGTGGGGAACGAGTGGGACCCG
GAGGACAGCAGGTACGGCACGCTTGCCGCCATGGCAGCCGTGGCGAACGCAACGAGTCCC
GCATAGCCTTAGAAGAAGCAGGAAGCGCGAAGTCAGATTTGATAGCACGGCGTTTGGGCG
TCTGAGATTTCCGTCGATACCGCAACTGTTCCTTGGGGGAGAGTGGCATGGCATTTTAAT
GTGTGGAATCACGACGTTTGCGAATGTATGTAGGTTGTACAGTTGTGATTCAATTCGAAT
TGCTCGCCATTAAGCCATATCGAGTAGTCGCTTTGCCACGGGAGAGCCAGGAGAGGGAAA
GGTCCACGT
>MATOU-v1_1290581
TGGTGGAAATATGTCGCAATCTACCAAATTTATCCTGCATCCTTTCAAGATTCCAATGGG
GACGGCATCGGCGACCTTCAGGGCATCATACAGCGACTGGACTACATCAAATCCGTCGGT
GTCGACGTCGTCTGGGTCTGTCCCATGTATGAAAGTCCGCAGTTAGACATGGGCTACGAC
ATTTCGGACTACCAAGCCATATACGGTCCCTATGGTACCATGGCAGATATGGATCAGTTA
ATCGCGGAGGTTCACAGGCGCGGAATGCGCATCATTTTGGACTTAGTGGTCAATCATACC
TCGGATCAGCACTCATGGTTCAAAGAGTCGAGGTCTTCGAAATCGAACCCGAAACGCGAC
TGGTACATCTGGAAGCCGGCAAATTCCGATGAACGAGGAAATAGGAAACCACCAAACAAC
TGGCGATCCAACTTTGGCGGAAGTGCATGGAAATGGGACGAACACACTCAAGAGTACTAC
CTACACTTGTTCTGTCCGGAACAGCCGGATCTGAATTGGGATAACAATGAGGCGCGGAGA
GCTATCTACGAGACAGCTATGATCTACTGGCTAGAAAAGGGCGCGGATGGCTTCCGAGTC
GATACAGTCAACATGTACAGCAAAGACCCGAGCTTTCCAGACGCCCCAATCACCGACCTC
GAGGCTGAATGGCAAGAGGCTGGTCTGGTCTACTGCAACGGCCCACGCATGAACGAGTAT
CTCTCAGAGATGAATTCGATCTTGACGAGATACGATGCCATGACCGTTGGCGAGTGTCCT
TTTACACCAGATACGATGCCATGACCGTCGGCGAGTGTCCTTTTACACCTGATCGGAATA
AGGTCATTGACTATATAGGAGCGTCGAAAAATCGTCTCAGCATGGTGTTCCAGTTTGACG
TTGTCGACGTTGGGCTGGG
>MATOU-v1_1290582
TGGTGGAAATATGTCGCAATCTACCAAATTTATCCTGCATCCTTTCAAGATTCCAATGGG
GACGGCATCGGCGACCTTCAGGGCATCATACAGCGACTGGACTACATCAAATCCGTCGGT
GTCGACGTCGTCTGGGTCTGTCCCATGTATGAAAGTCCGCAGTTAGACATGGGCTACGAC
ATTTCGGACTACCAAGCCATATACGGTCCCTATGGTACCATGGCAGATATGGATCAGTTA
ATCGCGGAGGTTCACAGGCGCGGAATGCGCATCATTTTGGACTTAGTGGTCAATCATACC
TCGGATCAGCACTCATGGTTCAAAGAGTCGAGGTCTTCGAAATCGAACCCGAAACGCGAC
TGGTACATCTGGAAGCCGGCAAATTCCGATGAACGAGGAAATAGGAAACCACCAAACAAC
TGGCGATCCAACTTTGGCGGAAGTGCATGGAAATGGGACGAACACACTCAAGAGTACTAC
CTACACTTGTTCTGTCCGGAACAGCCGGATCTGAATTGGGATAACAATGAGGCGCGGAGA
GCTATCTACGAGACAGCTATGATCTACTGGCTAGAAAAGGGCGCGGATGGCTTCCGAGTC
GATACAGTCAACATGTACAGCAAAGACCCGAGCTTTCCAGACGCCCCAATCACCGACCTC
GAGGCTGAATGGCAAGAGGCTGGTCTGGTCTACTGCAACGGCCCACGCATGAACGAGTAT
CTCTCAGAGATGAATTCGATCTTGACGAGATACGATGCCATGACCGTTGGCGAGTGTCCT
TTTACACCTGATCGAAATAAGGTCATTGACTATGTAGGAGCGTCGAAAAACCGTCTCAGC
ATGGTGTTCCAGTTTGACGTTGTCGACGTTGGGCTGGGAAAAATATTCAAATTCCAGACG
GCACCATTTGCGTACAAGCTACACGACCTTAAGGATGCCATTGCGCGGACGCAGGGGCTT
TTGCACGGCACTGATGCATGGACGACGTCATTCGTGGAAAATCACGACCAGGCACGCGCA
ATTTCGCGATTTGGAGACGATGGCCCGCAGTGGCGCGAGCGATCTGGAAAGCTACTGTCG
CTCCTGTTTGCTTCCCTCTCGGGAACACTCTTCATTTACCAAGGTCAGGAAATTGGCATG
ATCAATATGCCACCCGATTGGCCGATTGAAGAATACAAGGATGTGGACTCAATCAATTAC
TACTCGATGGTCGCGCAGCGCAGCGGTAACAATGAGCATGAACTCTCCATGGCGAAAAAG
TCGCTCCAGCACCTCTCGCGTGATCACGCCCGCACGCCAATGCAGTGGGACTCCGCGCGG
AACGGAGGTTTCACAGGCGACTCGGTCGAGCCATGGATGCGGATGAACCCGTCTACCGCT
GAGCTCAACGTTTCTCGTCAAACAGCCAGCAAAGATTCATTACTTGCTTTCTGGAGGCGG
ATGCTTGCACTGCGGAAGCAGGCTAACGATGTCCTTGTCAATGGGCACTTCGAGCTTGTG
GACGAGGCCAACGAGACGGTCTTCAGCTTCCTCAAGCATGGCAGGACCCGCAGTGCTCTG
GTCGTCTGCAATTTCTCCTCCAACGAGGCTCGAATGCCTCAAATAGCTTCAGACCAGAAG
AAGGAAGTGGTGATGGACAATGTCTCAGAGGCGACCAGTGAAAGCACATTGATGCCCTGG
CAGGCCAGGATATATCTGCTGCACTGAAATACATAGATCTTTACATTGGGTATATAGCTA
CCGGACAGCATACAGGCGTTCTCGAGCCGTCGCAACGCCGTTCTGCCCTAATACTTCATT
GA
>MATOU-v1_1290583
CACAATTAGACATGGGCTACGACATCTCGGACTACCAAGCCATATATGGCCCCTATGGTA
CCATGGCAGACATGGATCAGTTGATCGCGGAGGTTCACAAGCGCGGAATGCGCATCATCT
TGGACTTGGTGGTCAACCATACCTCGGATCAGCACTCATGGTTCAAAGAGTCAAGATCTT
CGAAGTCGAACCCGAAACGAGACTGGTACATCTGGAAGCCGGCAAAATACGATGAATATG
GAAATAGGAAACCACCAAACAACTGGCGGTCCAACTTTGGCGGAAGTGCATGGAAGTGGG
ACGAACACACTCAGGAGTACTTTCTGCACTTGTTCTGCCCGGAACAGCCGGATCTGAACT
GGGACAACGATGAGACGCGGAGAGCTATCTACGAGACAGCCATGATCTACTGGCTCGAAA
AAGGTGCGGATGGCTTCCGAGTCGATACGGTCAACATGTACAGCAAAGACCCGAGCTTTC
CAGACGCCCCAATCACCGACCTCGACGCTGAATGGCAAGAGGCTGGTCTGGTCTACTGCA
ACGGCCCACGCATGAACGAGTATCTTTCGGAGATGAATTCGATCTTGACGAGATACGATG
CCATGACCGTTGGCGAGTGTCCTTTTACACCTGATCGAAATAAGGTCATTGACTATGTAG
GAGCGTCGAAAAACCGTCTCAGCATGGTGTTCCAGTTTGACGTTGTCGACGTTGGGCTGG
GAAAAATATTCAAATTCCAGACGGCACCATTTGCGTACAAGCTACACGACCTTAAGGATG
CCATTGCGCGGACGCAGGGGCTTTTGCACGGCACTGATGCATGGACGACGTCATTCGTGG
AAAATCACGACCAGGCACGCGCAATTTCGCGATTTGGAGACGATGGCCCGCAGTGGCGCG
AGCGATCTGGAAAGCTACTGTCGCTCCTGTTTGCTTCCCTCTCGGGAACACTCTTCATTT
ACCAAGGTCAGGAAATTGGCATGATCAATATGCCACCCGATTGGCCGATTGAAGAATACA
AGGATGTGGACTCAATCAATTACTACTCGATGGTCGCGCAGCGCAGCGGTAACAATGAGC
ATGAACTCTCCATGGCGAAAAAGTCGCTCCAGCACCTCTCGCGTGATCACGCCCGCACGC
CAATGCAGTGGGACTCCGCGCGGAACGGAGGTTTCACAGGCGACTCGGTCGAGCCATGGA
TGCGGATGAACCCGTCTACCGCTGAGCTCAACGTTTCTCGTCAAACAGCCAGCAAAGATT
CATTACTTGCTTTCTGGAGGCGGATGCTTGCACTGCGGAAGCAGGCTAACGATGTACTTG
TCAATGGGCACTTCGAGCTTGTTGACGAGCCCAACGAGACGGTCTTCAGTTTTCTCAAGC
ATGGCAAGACTCGCAGTGCTCTGGTCGTCTGCAACCTCTCCACGAACGAGACAAGACTAC
CTCAGATAGCTGTGGACCGGAAGAAGGAAGTGGTAATGGACAATGTCCCAGAGTCGACCA
GTGAAAGCACATTGATGCCCTGGCAGGCCAGGATGTATTTACTGCATTGATATACATAGA
CGATTACATCGAATATGTTGTGACCGGGCAGCACAAGAGCTTTCTCTAGCTGTCGCGACG
CCGT
>MATOU-v1_1290648
CTCATCAATCATTTCGTTCCATTTTTCGTACTACGTGTCTTCATCAATTGCCGTACAGGC
TCAGCCTAGTGAAGTCAGGCCAAACTATCTACTTTTCCACTTTCTTTCAGTCGTCAGACT
TCGGCTTAAGCCAACTTCATCGAGAACTCGCCCGTAAGTGGCACGTCCGTGTGCAGCACC
AGTTTTTGGTTCTCGCTGTCGTACTCAGCTCCCTCCATCTCCTCCGAGGGTGCCTTCTCA
ACACCAAGAAGGGTGATCATCTCGACCGAGACGCCAGCATCGTAGTCAAAGCTGCCTGTC
ATGCTAAACTCGCCGTCCTTGTATGAGAACTCAATCTCGGAGATCGCTTCCTGGGACAGC
GACTCGCCATCGTCCAAGTACAGCGTTCCCGAGGCAGAGCCATCAAGACCGGGCGCGATG
ACGATGTTGAAGCCCTTGTTACGCAGATCGTAGGTGGTCATGGCGCTCTCAACACGCTGA
GGAACAATGCTGCCACCCTTGTAGTGCACCAAGATCTCGTCGAACGGCACCTCGGCGTCA
ACATAAGCTCCTTCACCGCGAACGGGCTCTCCGCTCCCCCAAGCGTAGAAGATGTCGTCT
GGTAGATAGAAACTAACACTGGTGGAATTCTCTTCCGTTACGGGGCTGATGAGCATAGAG
TCACCATAGAAGAACTGGTAGTCGATCGCGAAGGTGTTCTCGTCCTGCGGGTAGTTGAAG
AACATGGGGTTCAAGCAAGGAGTACCAGTCTGGTTCTGCTGGTAGATAGCAGTGTAAATG
TAGTCGAGCAGCTGGTAACGGATACTAATGCCATTTCTAGCAGCAGAAGCTGTTACAGGC
CAGCGATAGAATTCTTGGTAGATGGCATCGATGTCGGCGTGGTTTCTCATAAAGGTTGAA
AAGCTTCCAAGAGTCGCCCATCGAGCGCAAAGGGTAGAAGTAACGTTGCCGCCAAAACCG
CAGATGTCACCACCGACGAACGGGAACTGGTAGAGGGAGGCAAATTGCAGGAGCTGCGAG
ATCTGGAATCGGTACTGTGACCATTCTGAGAGGTTGTCTCCAAGCCAGTGCGAGACGTCT
TTGCCAGCTCCAGCAAATGTGCTTCGTGTAATAACGAGAGGTCGCACATCCGGCCTGCGG
GCCAACATGGAGTTGTGGGATGCGGAGCTCATCATGGCACCATATAGATTGTGCACGTCG
TACTCAATCAAGCCGTTGGCGTGGACAATATCAGTGTCAGCGGTGCTGCCTGCAAGAGTA
GGTCCGGCCCCATTCTGGATCATGTACGGCGGCCTGATGTATTCGCGGTTTGGCAGACCT
TTGCACTCGTTCGGCCCACAGCCTGAGCCGCTTTGCTTGCCGTTCTGCCCCCATGTCTCG
TTCGGCCCACAGCCTGAGCCGCTTTGCTTGCCGTTCTGCCAGCCATTGTGACGGCCATTG
GTGCCCTTGCCCCAACCGCCTTGGCCCCAGTGAGGCTTGCTCCAACGTCCAGGGGAGTGA
CCGCGGCCGCGGCCGTGGCCACCATGAGCTTGACGCTTCTTGACATCGACAGGAGCGAGG
TCACCTTGTAGGCTCTGCGGGAAGCCAGGGATAGGAGCGTCTGGTCCGTCTCTGACAGGC
GGCGGGTCTGGAGGGTTGTCGTTTTCTTCAGC
>MATOU-v1_1291037
ACATGGGGACTGTAGCAGAGGATCGAGGTAGTGAGCAGGGTGGCAGAGTGTGGTGACTTG
GGTGCTGCAAAAGGGTTTCCATTTCTGCTTTCCTTTTTTCTGCATTGGGCGGGTGGTCGA
CGGGAAGGAAACTGAGCATGATATGAACAACCGTGACCCCTTTAACCTGCGGCGTTCCCC
TGGCTCTGGCCTTCTTCGCTCCACATCATACTTTGGACGTACTCCGTCGCCTGAGAAGAG
ATCGCTTGCCCCTGAAGAAGCATTAGCTCCGCCGGCAGCATCGAACATGTCGTCCTATGC
ACCGCCTATATCAGGCGGCCCGACGCAAAGACACCCAGATCATTGGCACAGCTTGGCAGA
TGGGCAGGGCCAAGGGAGCGTGACAGAAAAGATCAGTGGTATATTTGGCAATGGAACTCA
GGAGGCGCTGCCTATGTACAAAGACAAACCGTATGCACACTTGAAGAGCGGGAGGCACTT
GCCGTGGTTTAGACGCAAGAGGACAATGGGTCTAGTACTAGCTGGACTTGCGGGGCTCAG
TTGGTACTTTGGAATACTGTCCCCGCTTTCATATCTTTCCGGGAGTAGCAACGGCGTGGC
AGGCAAGAAGAGCACGAGTTCGTCATGGTTCGGAGGCTCTACGGCTGTGGATTGGGATGC
CAGAGCGGAGTTGGTCAAGGAGGCGTTCAAAACATCCTTCGCCGATTATGAAAAGCACGG
TTGGGGCCAGGATGAATATCATCCAGTCGCAAAGGATGGCAAAAAGATGACTCCAAACGG
CCTCGGCTGGATCATTGTCGACGCACTGGATACCATGATGCTCATGAATCTGACAACGGA
GCTTACCCACGCTCGTCAGTGGATCAAGAATGACTTGAATTACGACCAGGACCACGATGT
GAGCACCTTCGAAACGACAATCCGCATGCTTGGTGGCTTGCTTTCAGCCCACTACCTCAG
TACGAGCTTTTCAGGCCAATTTGCACCAGTCAGCGATGGCCTCAGCGACGACCTATATAT
CGAAAAGGCTACTGATCTGGCGGATCGCCTGCTAGGGGCTTTTGAGACCCGGTCGGGTGT
GCCACTTGCGAGTGTTAATTTACATACCTCTCAAGGCATTCCCTCCCACGCAGATGGGGG
TGCTTCATCTACGGCTGAAGCTACGAGTGTTCAGTTGGAGCTCAAGTATCTGGCTAAGCT
AACCGGCGAGGATCATTATTGGGACAAGGCTGAAAAGGTCATGGAAGTTATTGATAAACA
GCACCCAACTGACGGCCTCGTACCCATCTTCATGTATGCAGACATGGGCGC
>MATOU-v1_1291676
ACATGGGACCGACACCACCCAGTCGAGACTGTGGACTCCCAGCATCGCGTGCACGAGCAG
GACTCGAACTTGGCTTCGTCTGTCTTGAGTGTGCGTCCTGATCAACCGCGCCCATTGTGA
TCACCGCCGACTGGTGGCGATCAGTCCCGCAAGCCGCGGCGTCGAGAAGAGAGTCAAGAG
TGGGAGTCGGCAGCAGCAGCACGACAGCACGAGGCAGGTAGGGGTAACACCCACTGCATC
AAGGGTCGAAAGAACAGATACACCCTCCTATACACATCTCATCCACACCCATACATACCA
CCAACCATGGCGGGGTCCACACGATACATGAGGTACATCCTCATCGCCTTCGTCGCCCTC
GTCGTCATCTTCTTCATCTCCGCCAGCTCGAGCGAGTCCCGAGTCCCTGGCGCCGATCGC
GTCCATTCCGCGACAGAGATGCTAAAGGGTCAGGGTAATAGCCTCTGGAAGGGCTCGTCA
TCCTCGTCCGCGACCTCGTCCGACGATGGGACGGTCCCCGCGGGCAAAGACGGCCTGGTC
AGCGATGCGAAGAGCAGCCCCGCTGCCGACGCCGTTAAGCCCGCCGCATCGCACCATTCC
TCCGCCTCGTCGGCGGCGGCGCCACATGCGTCCGACCACAGCAACACCTCGCCCAACCCC
TTCTCCGGTAGCCTTGGTGGCCAGAACAGCCTCAGCTCTGACACCGCCCCTGGCCCGCGC
ATGAACGCGACCTTTGTCACCTTGGCCCGCAACTCGGACGTGTGGGAGATCTCGCGCTCC
ATCCGCCAGGTCGAAGACCGCTTCAACCACCGCTACCACTACGACTGGGTCTTCCTCAAC
GACGCCGACTTCGACGAGACGTTCAAGTCCGTGACCAGCGCGTTGACCTCCGGCCGCACG
CGCTATGGCAAGATCGACAAGGAGCACTGGGGCTTCCCCGAGTTCATCGACCAGGACAAG
GCCGCCAAGGTGCGCGAGGACATGCACGAGCGCAAGATCATCTACGGCGACAGCATCTCC
TACCGGCACATGTGCCGCTACGAGTCCGGCTTCTTCTTCCGCCACCCGCTCATGATGGAG
TACGAGTGGTACTGGCGCGTGGAGCCCTCGATCGAGCTGTACTGCGACATCAACTACGAC
ACGTTCCAGTTCATGGCCGAGAACAACAAGAAGTACTCCTTCGTGCTCTCGCTGTACGAA
TACTTCGAGACGATCCCGACGCTGTGGGACTCGGTCAAGGGCTTCATGAAGGAGCACCCG
GAGCACATCGCCAAGGACAACAGCATGGGCTTCCTGTCCGACGACGGCGGCGTGACCTAC
AACCACTGCCACTTCTGGTCGAACTTTGAGATCGGCAACCTGAACTGGCTGCGCAGCGAC
GCCTACATCGACTACTTCAACCACCTCGACCACGACGGCGGCTTCTTCTACGAGCGCTGG
GGCGACGCCCCCGTGCATTCTATCGCCGCCGCCCTGCTCCTCCCCAAGGACCAGATCCAC
TTCTTCAACGACATCGCCTATTACCATGTCCCCTTCACCCACTGCCCGACGGGGGAGAAG
ACGCGGTTGGATCTGCGATGCCACTGCAACCCCAAGGACAACTTCGACTGGAACGGATAC
TCTTGTACCAAACGCTTCTACGAGCTCAACTCGATCCCGCTCCCCGAGGGCTACGAGAAG
GAACAGTGACTGGCGGGCCGCCGTCGCGAGGCTATCTGGGACCGGCACATGGTGCTCAAG
ATCGCCACCGTCTCCTTCCTCGGCACCGTCGCGCTGGGTGTAGGACTACTGCTCGGTTAT
CGGCCGATTATGGCGGGCGTGAGGGTTTTGGTTGGGGGTTGGGAGAAATGGAAAGGGAAA
GGCAGAGGCGATGGGGTTTCCTCTTCTTCTGCCCGTGACGGTAGGGGTCTTCTTGCTGCT
ACGCTTGATGAGGATGTCGAGAAGAGGCGACGGAGGTGAAGGGTTTCCCTTCGTTTTCCC
CCTCCCCAATATCCTTTTATCCCCGCCCTGTACCAGTTTCCTTGGATCTCTAGCTCCCGA
GACCCGTCTTTTTGTTTTATTAGGGGGAAAAATCGGAtttttttATTTCAAAGAACGGAA
AAATGAAGTTTTAC
>MATOU-v1_1291677
ACATGGGACCGACACCACCCAGTCGAGACTGTGGACTCCCAGCATCGCGTGCACGAGCAG
GACTCGAACTTGGCTTCGTCTGTCTTGAGTGTGCGTCCTGATCAACCGCGCCCATTGTGA
TCACCGCCGACTGGTGGCGATCAGTCCCGCAAGCCGCGGCGTCGAGAAGAGAGTCAAGAG
TGGGAGTCGGCAGCAGCAGCACGACAGCACGAGGCAGGTAGGGGTAACACCCACTGCATC
AAGGGTCGAAAGAACAGATACACCCTCCTATACACATCTCATCCACACCCATACATACCA
CCAACCATGGCGGGGTCCACACGATACATGAGGTACATCCTCATCGCCTTCGTCGCCCTC
GTCGTCATCTTCTTCATCTCCGCCAGCTCGAGCGAGTCCCGAGTCCCCGGCGCTGACCGC
GTGCATTCTGCGACGGAGATGCTGAAGGGTCAGGGCAACAGCCTCTGGAAGGGCGCGTCA
TCCTCGTCCTCGTCCTCGTCCGACGCTGGGACTGTCCCGGCAGGTAAGGACAGCCTGAGC
AGCGATGCGAAGAGCAGCCCCGCTGCCGACGCCGTCAAGCCTGCTACATCGCACCACTCC
TCCGCCTCCTCGGCGGCGGCGCCACATGCGTCTGACCACAGCACCACCTCGCCCAACCCC
TACTCTGGCAGCCTCGGTGGCCAGAACAGCCTCAGCTCCGATACCGCCCCTGGCCCGCGC
ATGAACGCGACCTTCGTCACCTTGGCCCGCAACTCGGACGTGTGGGAGATCTCGCGCTCG
ATCCGCCAGGTTGAAGACCGCTTCAACCACCGCTACCACTACGACTGGGTCTTCCTCAAC
GACGCCGACTTCGACGAGACGTTCAAGTCCGTGACCAGCGCGTTGACCTCCGGCCGCACG
CGCTATGGCAAGATCGACAAGGAGCACTGGGGCTTCCCCGAGTTCATCGACCAGGACAAG
GCCGCCAAGGTGCGCGAGGACATGCACGAGCGCAAGATCATCTACGGCGACAGCATCTCC
TACCGGCACATGTGCCGCTACGAGTCCGGCTTCTTCTTCCGCCACCCGCTCATGATGGAG
TACGAGTGGTACTGGCGCGTGGAGCCCTCGATCGAGCTGTACTGCGACATCAACTACGAC
ACGTTCCAGTTCATGGCCGAGAACAACAAGAAGTACTCCTTCGTGCTCTCGCTGTACGAA
TACTTCGAGACGATCCCGACGCTGTGGGACTCGGTCAAGGGCTTCATGAAGGAGCACCCG
GAGCACATCGCCAAGGACAACAGCATGGGCTTCCTGTCCGACGACGGCGGCGTGACCTAC
AACCACTGCCACTTCTGGTCGAACTTTGAGATCGGCAACCTGAACTGGCTGCGCAGCGAC
GCCTACATCGACTACTTCAACCATCTCGACCACGACGGCGGCTTCTTCTACGAGCGCTGG
GGCGACGCCCCCGTGCATTCCATCGCCGCCGCCCTGCTGCTCCCCAAGGACCAGATCCAC
TTCTTCAACGATATCGCCTACTACCATGTCCCCTTCACCCACTGTCCGACAGGGGAGAAG
ACTCGGTTGGATCTAAGGTGTCACTGCAACCCGAAGGACAACTTCGATTGGAACGGATAT
TCTTGTACCAAACGCTTCTACGAACTGAACCAGATCCCGCTCCCCGACGGCTACGAGAAG
GAACAGTGACTGGCAGGCCGACGCCGCGAAGCCATCTGGGACCGCCACATGGTCCTCAAG
ATCGCCACCGTCTCCTTCCTGGGTACCGTCGCGTTAGGTGTAGGATTATTGCTCTGTTAT
CGGCCGATTATGGCGGGCGTCCGGGTTTTGAGCGGGGTTTGGGGGAAATGGACAGGGAAA
GGAAATGGAGATGGGATTTCTTCTTCGGCTGGTGATGATAGGGGTCTTCTTGCTACCACG
CTGGATGAGGATGTGGAGAAGAGGCGACGGAGGTGAAAGGATTTCCCTCCCCCTTTTCTC
AAATGGTTGGATGATGGGGTGGGGTAGAGGGGGTCGCTCCATCCCCGCCCCAACCCCATC
CCTCATCTTTCTCGCTGCCTGCCCCTCTTCCTGTCTTTGCTCATTAGATCTTTAGCCTCC
CGAGTCCTCCCCCCATTTTATTGGTTTTATTAGAGGGTAAATGAATTCTTTTCAACCGaa
aaaaaaaaagaaaggaagaaaatgaaaaTGAATAGATTCAGTGACATGAGGGTCTCGTAT
GAATGGTCTGAAAGCCTTTTACCATCCG
>MATOU-v1_1292506
ATTTTGCGGACACCATCGTCATGGCCAACCTGGGATACTTTCAGTTCAAGGCGAACCCGG
GAGTCTACAGACTAGCCTTACAGAAAGGCAGAAGTGAGGAAATCTTCCAAATTGACAGCG
CCGGCACGAATGGATACAAGCCTCGACCGGGCGACAACTTTACGGAGATGGCTCTCATGA
GCTTTAGAGGAGCTACGCTTTATCCTCGGCTGTCTCGCAAGCCTGGCATGGAGGAAGAAG
ACGTCCTTGAGGCTGCCAAGTCAACCCTGGACCATTTCGCTGACGGCGCTGATCAACTGT
TGGCTCAAGTTGGCATAAATGGACTCAAAGCAAGCAAGTACATGTCCAAGGCCGCTAAGC
TTGGTTCGAGCTTATTCGCCGGCAGCGATAGCAAACAGTCTGCTGGCACGGTAGAGCCCC
ATGCAGATATCAACATCTTCTCAGTCGCATCGGGGCACCTCTACGAACGAATGCTGAATA
TCATGATGGTCTCTGTCATGAAGCACACCCAACACACCGTCAAGTTTTGGTTCATTGAGC
AATTCCTATCGCCGTCTTTCAAGGACTTCCTGCCCGTTCTGGCGAAGGAGTACGGGTTCA
AATACGAAATGGTCACGTACAAATGGCCGCACTGGCTTCGGGGTCAGAAGGAAAAGCAGC
GCGAGATTTGGGGTTACAAGATCCTTTACCTTGACGTCCTGTTCCCTCTTGATCTTGACA
AAGTGATTTTCGTCGACGCCGACCAGATCGTACGGACGGACATGTACGAGCTTGTCCAGC
ACGACTTGCAGGGGGCGCCGTATGGCTTCACGCCCATGTGCGATTCGCGAACGGAAATGG
AAGGCTTTAGGTTCTGGAAGCAGGGTTACTGGAAAAACTTCCTACGGGGTCTCCCCTACC
ACATCTCCGCACTCTATGTGGTCGACCTGAAGCGATTCAGACAAATCGCAGCTGGCGACC
GGCTCAGGCAGCAATATCACCAACTCTCCGCCGACCCGGCGAGCTTGAGCAATCTAGACC
AAGATTTGCCTAACCACATGCAGATGGCGCTGCCGATACACTCTCTCCCTCAAGATTGGT
TGTGGTGCGAGACTTGGTGTTCGGATGAAGCTCTCAAGAACGCTAAGACGATTGATCTTT
GCAACAACCCACAGACGAAGGAGCCGAAGCTGGATCGTGCGAGGCGACAAGTTCCTGAAT
GGACGCTGTATGACGACGAGATTGCTGCGCTCGCGAAGAAGCATAAGGATAGGGAAGCAG
CTGGCAAGCCTGTAGCCGGGGACGCCGCAGACGCAGGTGTGCAAGGGCAGGAGGAGGAAA
GCGTCCAGGAACGACTGCAGCGGGAAGATGCAGAGAAGGAGCGCAAGAAACAGGTACACG
TGAAAGATGAGCTATAAAAAGTAGAAGTGTATGATCACCTTAACAGGCATGCTGGCAAAG
ACCCTTGGGCATTGTGGGACTAGTCACGGGTGCACGCAAATGCCTGACATCTGAGTCGCG
CTGCCGTGATCCGAAGTGCTCTATTTTTTCTATTTAACCGTCCGTACCTTGGATTCGCCG
CGGAGGACCAGTAGTAATAACCATTTATAGCAGATACGAGGTAGTAGTGGATACACCTCC
GACACTATAGCGACGATATATAGCATTAACAGCCTAGTACTGTAGCATCTGTATCTCATC
GCGCATCGGAGTGCTGTCATTTCAGTTGATTTGGTTCCATGGATAGCTCGAAATACGAGG
CTTTAGAGTCTTGGCAAACGCATGAGATGCTAATTCAAGTGGGATCGGCACGTCCCCTTC
CCCCATTCCAACTTCGGCAAGAGCAGATCGCCGTTAGGAGAAAACCGCGCTTGCGTGCCA
TCCGAGCCATCGTCGTTTCCACAGGGTCCATGCGGGTGCAATACTATGTGTCCTCACATC
GAC
>MATOU-v1_1292730
GCTTAAGCGCGTCAACCAAAGCCTCCAAGCGCGCCCGCCGTCTCAGCACTACTTCCTGCT
TTTCTACTATTCCATACACCTCTACTCACACACTGTCGCTTCCGTGCTCCGTCGCTTCTT
CCTTTTCTCTTCCTTCCCACGCGAGCATTCGTCTTCGTCTTTCCGGCGTGTGAGCGAGCG
AACTAGGCGAATACGAGCGAAGGCGGAAACAATTATGGTCGCGTTCCACTTGGGCCATGC
GCTGCTGCTGGCCAGCGCTTTAGGCCGGGGCGCGCAGGCCGTCGTTCGCGGGGTCAATCT
TGGCGGTTGGTTGGTGACGGAACCTTGGATGACCCCGTCGCTGTTCGAAGACACTGATAC
CGAGGACGAATGGCACCTTTGCAACCAACTCGGCAAGGACAAATGCCTCGAGACGCTCCA
GGACCACTGGGAGAACTTCTACACCCGCGATGACCTCGTCGCCATCAAGCGCGCCGGGCT
CAACTCCATCCGCATCCCGCTAGGTTACTGGGCCGTCGACCTCGAGGACTACGAACCTTA
CGTGAAGGGCCAGTATCCTTACCTCATTCGGGCTGTGAAGTGGGCCCAGGAGCTCGGTCT
GACTGTCTTCCTCGATATCCATGGCGCGCCTGGTAGCCAGAATGGATACTCTGGTAGCGG
TCTTGTCGACGTGGTCACGTTTCAGTCCAATCAGACCAACGCCGATCGCACGCTGAAGGT
GCTGAGAAACCTGACTCAGGAATTCTCCCAGGAGCAGTACGGCGGTGTTGTCACTAATAT
CGAACCTCTTAACGAACCCCTCTTGAGCTTTGAAGATCTCAAGGACTTTTACGAGCCAAG
CTCGAAAATCGTCAATGTCACTGGCATCAACTTCACCATCCACGATGGTTTCTAcaaccc
ccactcctgggcaaactacgaccccaacaaccccaacgcccaaaaacccgccccccaTCT
CGTAGTCGACACGCACCAATTCTGGGCCTTTCCGCCCCTCGACAACCTCACCAAACTCCA
AACCATCGAACACATCTGCGACTTCGGCCAACAAATCCGCAACAACAGCGCCATCCCCTA
CACCCTCGTCGGCGAATGGAGTCTCAGCACGGGCATCACAGCCAACACGACGGGCAACAC
CGAAAAAGATGCCGAAAAACGCACCTGGTTCCGCGAACTCTTCGAAGCGCAGAACGCCGC
CTTCACCCCCTACGACGCCGGCCAGTCCTCCATCGGCTGGTACTTCTGGGCCTGGAAACT
GGAATACGACATCGACGCGTGGTCCTACCGTCGCGGCCTCTCCGACGGCTATATCCCCTC
CAACATCTCCGACCCTAGCACCTACGAGTACCCCATCAAGAAGAACGGGTGTATCGATTC
GGATCATGAGTATGAGGCCAAGGCCCAAGTGACGTTTACCACGTATTCGCCCTCGTCGAC
TGCGACGTCGTCGTCTTCGTCGTCAAGTAGTGGTAGTGGTAGTGGGAGTGGGAATGGTGG
TTCGGACGACTCGTCTGACTCCTCGTCATCTTCTTCCTCCTCCAACTCGGATTCTTCCTC
TTCGACCTCAAGCGGTGCCGCGACCCCGACGGCGAGGATCTCCTTCGAGTCCCTTCCCGG
ATTGGGCTTTCTTGCCCTGGCACCGCTGGTTTTCTTCGGTGCGAGTCTGTTTTTGTAAAA
GATTTTTGGAAAAGTAAGAACGGATATGGGAAAAAGATATGAGGTCAGGGGCCCAAAGTG
GGTGGGGTGGGGAAGAAATGCATCCTCGCGTTTTGGCATTTGACATGAACGGTTCCTTTT
TTCAGACGACGCCACATaagggaggtaaaggagggaagggaaggaagggaaaggaaagga
aagagagaaatgaaaagagaagaTCTTGCATCAGATGGCCCCCGGGATGGGGCATGCATG
GATTATGGCGttttcttcttcacctatttccccctttttctttttttcttttgcgcatct
ctttcccttttctcccttttACGAGCATGAGAATTTAGTTGTAATGTCTTTA
>MATOU-v1_1293579
TGTATCGCGAATATTTCTAAGTGGCACAGCACAGAGACAGCGCATATAGAGCGCTATGAA
CGCAGATGCAGCCACCGAAATGGATGGAGATTACTTTTTCCCGCTCCCATCGGCCAAGGT
CGTGGAGCAGGACCGCAGTGTTTCTAAGCTGCTTCGTAGGAGCCTTCACTATCAGCATGG
TCATCACATATGATTTTGCAATCTTGTCAGCACTGGCAGAAGGCTCTCTCGCTATTATCG
CCAATAACGCTGGCCCTTGGCGATCGACAGGCCCGCATCACAACACAAGTTACTGGTCTG
ATGAGTTGAAGAACACACTGGTTGTGATGCAGAGCGAGCCGTTCTGGAACGGTACATACT
GGCCTGATACAATCCAATGGATAGGCGCTTTCCTCAATACACTCGTCGCTTCCTCGGAAC
GCTCCTTTACCTCTGCGGTGGAGACGGAGGATGCTGCATCTTCAGGCACTCATAGTCCAT
TCATCTCCCACCAGGCCGGAAGAGCCAAGTATTACTCGGGCGTCCAAGCTTACTTTGACA
CCGAAGATGTGATACAGATATTTGACGCCGCCTACGACGACGCTCAATGGGTTGTGCTTG
AGTGGCTCGAAGCTATCAGGTTCATCTACCAATACGACGAATATGCTTCTTCTGCGCTAG
GCAAAGCAGATATAGCACGATTTGCGCATCGTGCTCACATTTTCTACAATATTGTCCAGG
ACCAGTTCGACGCCTCGCTCTGTGAAGGTGGAATCACTTGGAACCCTACACTAGCGCCGT
ACAAGAATGCGATCACGAACGAGCTCTTCTTGTCAAGCTCGATAGCCATGTATCTCTACT
ATCCCGGAGACAACAACACGGATCCTTATCCCAGTCCCGCGTACATGAACGCGACTAACA
CGACTTTACCAGCCTTGCCGCCTTTAGCAGCGCACGACCCCATCCTCTTAAGCAATGCAA
TCCGCGAGTACTCCTGGTTCAAATCCCACAATTTCACGAATGCCCAGGGTCTAGTCGTCG
ATGGCTTCCACGTCTCAGAAGGCCAGACTGCTTGCGACGAGCGGAACGAAATGGTCTATA
CTTACAACCAAGGCGTGCTGCTCTCTGGCTTGCGCCAGCTCTGGGAAGCCACTGGTGACA
TCCAGTACCTTATCGAAGGTTATGCGTTCGTCGAGACTGTCATTGATGCGACGGGCTGGT
ATGCCGCCTCTGGCTCCGGTGAAGAAGCAGGTCAGTGGGCCGGGTTGGGCCGTAATGGGA
TCATGGAAGATTACTGCGATGCCCCTGCCAATTGCTCCCAGGACAATCAGATTTTCAAGG
GGATCTACTTCCATCACCTCGACCTTTTCTGTGAACCGTTGCCTACACGCACCGCTTTTA
TCGAAGGGGTCACTTTCACCGCTTCCCCTGCGCTGGCTGCTGAGCATGCCGGGAAGTGTA
CGGCGTACCTTCCTTGGATTCGACGTAATGCTCGCGCTGCCCTGGCTACACGCAATGATA
CTGGTGTGGTAGGTGGATGGTGGGGAGCGAGCTTGGAAAACAAGACTCAGCAGTCCTGGC
CGGCTTATGCAGTGCCTAAGCCGGAAGGCAGTTTGGATGAGAAAAACGAAGCATGGGTGT
TAGGCGAGGCGCCGTGGAAGTGTCAAGGCTGGCATTGCCATGAAGGTCGGCAGGGGAGTC
GTGCAGGAGCTCTAGTCGCGGGAAATCTGATGAAGGCTCGGAGTGCTAGAAGTCGCGATG
TGAACGATCAGGGACGAGGGAGGACAGTAGAGACGCAAGGGAGTGGGGTGGGAGTTGTCA
AGGCTGCCTACGACGTTGGTAGAATAGACTAGCAATGCGATTGACTGAGATTCCAAAA
>MATOU-v1_1293921
ACATGGGGGCGCCTTTGTTTTCCTTTATCCTAATTAGCATTGGTTTTTCTAATCATGCAT
ATTTCAACTCTCGCGGCGGCGGCATCGGCCCTGGCCACGGTGTCTGCCCAATACACCGGT
TTTAACTATGGCAACCGGTTCACGGACGGCAGCTTCAAGCAACAGTCTGATTTCCAGGCC
GAGTTCAACAAAGCAAAGAGCTTGGCTGGAACCAACGGCGAGTTCACCAGCGCTCGTCTG
TTCACCATGATTCAGGGAGGAACGACGAACACTCCTATCTCTGCCATCCCAGCGGCCATC
GATACGCAGACTAGCCTTCTCCTTGGGCTATGGGCATCGGCTGGTCAGGCCAACTTCGAC
AACGAAGTGATTGCTCTCCAGAGTGCCATCGAACAATATGGCTCGGAATTCATTGACCTC
ATCGCTGGTATCTCTGTTGGCTCTGAAGATCTCTACCGTATCAGCCCGACAGGAATCGAG
AACGACTCGGGACTGGGCGCTGAGCCCCAGGAGCTTGTGAGCTACATCAACCAGGTCCGC
GATGCCATCGCTGGCACTGCTGCGTCTAGCAAAACCATCGGCCACGTAGACACCTGGACT
GCTTGGGTAAACGGCAGCAACTCCGCCGTCACTGAAGCATGCGATTGGCTTGGTATGGAT
GCCTATCCGTACTTCCAGACCACCATCGACAACAGCATCGATGTTGCCAACTCTACTTTC
TACGAAGCTCTTGATGCCACCGAAGGCGCAAGCATGGGCAAGCCAGTCTGGGTCACCGAG
ACCGGATGGCCAGTTATTGGAGAGACTCTGAACCAGGCTGTCGCTGGCACTGAGAACGCA
GAGATCTACTGGAGCGAGGTTGCCTGCTCCCTGATCGGCAACAGGAACATCTGGTGGTAC
ATTCTCCAGGACGCTGCCCCAACCGCCCCTGCCACGTCTTTCGGCGTTGTTGGAGCAGAC
CTGAGCAGCGCACCCCTATACGACCTTTCCTGCCCTGCCAACTCTGGCGCCGCTTCATCG
TCCGCATCCAACGCCACGAGCAGCCCTACGAGCATGGCTTCTTCGGCAACCGCACCAGCT
AGCGGAGCAGACCTGAGCAGCGCACCCCTGTACGACCTTTCCTGCCCTGCCAACTCTGGT
GCCGCTTCGTCCTCCGCATCCAGCGCCACGAGCAGCCCTACGAGCATGGCTTCTTCGGCA
ACCGCACCAGCTAGCTCTGCTGAGGGCGCAAGCTCCGCAGACATTACCAATGCTACGCCC
GGCCCACAGACTTCTCCGTCAAGTGTAAGCATCTCCCAGAGCACTGGCTCCGTTGCTGCC
TCTTCAGAGGGCAATGTGCCATCGAACCAGCCAGGCAGCGGCTCGCAGGGCAGCGCTGTC
GAGTCCAGCATGAAGGCTAGCTCAACTGCACCTGTCGCCACATCCTCCGCCATGACCCAG
GTTAGCTCGATGGCTCCTGTCGCCTCTTCTTCTGTCATGACCAAGGGCGGCAAGACCTAT
ACCACTTACCAGACGACGATGGTCACCATCACTTCATGCCCGGAAGCTTGCACTACCACC
GTTGCGCCCTCGACGAAGGGTGGCAACTCGATGGCCGAGAGTGCCTACGGCTCAGCCGGC
GTCTGGAGCTTCAAGGAGTCCGCTCCCGTGAGCAAGCCAACAACCACCGGTACGGTCGGC
ACTGCTTCGCCGTCTCCAGCGGCTAGCTCTGCCACTACGCCCGCAGCTCCATCCGGCTCT
GGCTGCCCCGCCAACCTGGACGGCGAGTACCAGTACCCGCGCCTGATCGTCCCTGTCTCT
TCCGAGAACAAGGACAAGGCGTACGGCACGAGCTACAACGGCACCATCAGCCCCTCCGTC
AGCTCCATCTTCAACTTCGACCTGCCATACTCGTACGAGGGCCAGACTTG
>MATOU-v1_1293922
ACATGGGGGCGCCTTTGTTTTCCTTTATCCTAATTAGCATTGGTTTTTCTAATCATGCAT
ATTTCAACTCTCGCGGCGGCGGCATCGGCCCTGGCCACGGTGTCTGCCCAATACACCGGT
TTTAACTATGGCAACCGGTTCACGGACGGCAGCTTCAAGCAACAGTCTGATTTCCAGGCC
GAGTTCAACAAAGCAAAGAGCTTGGCTGGGACCAATGGCGAGTTCACCAGTGCTCGTCTA
TTCACTATGATCCAAGGAGGAACGACGAACACCCCGATCTCTGCCATTCCAGCGGCGATT
GACACCCAGACAAGCCTTCTCCTTGGACTATGGGCTTCGGCTGGTCAGGCCAACTTCGAC
AACGAAGTGATTGCTCTCCAGAGCGCTATCGACCAGTACGGTTCGGCATTCATCGACCTC
ATCGCTGGTATTTCCGTTGGTTCCGAAGATCTCTACCGTATCAGCCCGACTGGTATCGAG
AACGACTCCGGACTGGGCGCTGAGCCCCAGGAGCTCGTGAGCTACATCAACCAGGTTCGC
AATGCCATCGCCGGCACTGCTGCATCTAGCAAGACCATCGGTCACGTAGACACATGGACT
GCTTGGGTAAACGGTAGCAACTCCGCAGTCACTGAAGCGGTCGATTGGCTCGGTATGGAC
GCCTACCCATACTTCCAGACGACCATCGACAACAGCATCGATGTTGCCAACTCTACTTTC
TACGAAGCTCTTGATGCCACTGAAGGCGCAAGCATGGGCAAGCCAGTCTGGGTCACCGAG
ACCGGATGGCCAGTCATTGGAGAGACTCTGAACCAGGCTGTCGCTGGCACTGAGAATGCC
GAGATTTACTGGAGCGAAGTTGCCTGCTCCCTGATCGGCAACAGGAACATTTGGTGGTAC
ATTCTCCAGGACGCTGCCCCGACCGCCCCTGCCACGTCTTTCGGCGTTGTCGGAGCAGAC
CTGAGCAGCGCACCCCTGTACGACCTTTCCTGCCCTGCCAACTCTGGTGCCGCTTCGTCC
TCCGCATCCAGCGCCACGAGCAGCCCTACGAGCATGGCTTCTTCGGCAACCGCACCAGCT
AGCTCTGCTGAGGGCGCAAGCTCCGCAGACATTACCAATGCTACGCCCGGCCCACAGACT
TCTCCGTCAAGTGTAAGCATCTCCCAGAGCACTGGCTCCGTTGCTGCCTCTTCAGAGGGC
AATGTGCCATCGAACCAGCCAGGCAGCGGCTCGCAGGGCAGCGCTGTCGAGTCCAGCATG
AAGGCTAGCTCAACTGCACCTGTCGCCACATCCTCCGCCATGACCCAGGTTAGCTCGATG
GCTCCTGTCGCCTCTTCTTCTGTCATGACCAAGGGCGGCAAGACCTATACCACTTACCAG
ACGACGATGGTCACCATCACTTCATGCCCGGAAGCTTGCACTACCACCGTTGCGCCCTCG
ACGAAGGGTGGCAACTCGATGGCCGAGAGTGCCTACGGCTCAGCCGGCGTCTGGAGCTTC
AAGGAGTCCGCTCCCGTGAGCAAGCCAACAACCACCGGTACGGTCGGCACTGCTTCGCCG
TCTCCAGCGGCTAGCTCTGCCACTACGCCCGCAGCTCCATCCGGCTCTGGCTGCCCCGCC
AACCTGGACGGCGAGTACCAGTACCCGCGCCTGATCGTCCCTGTCTCTTCCGAGAACAAG
GACAAGGCGTACGGCACGAGCTACAACGGCACCATCAGCCCCTCCGTCAGCTCCATCTTC
AACTTCGACCTGCCATACTCGTACGAGGGCCAGACTTG
>MATOU-v1_1293959
TTTCCACCTCATTTGTCCTCTTCATCTGTCGAGAAGAAGGAAAAAAGCCCAACAAGGTAG
TACCAGTAAATATAGACGTCTCCATCCCCTTTTGTGCATAGGACTTCTTTCGCTTTGGGG
GGACAATCTCGCTTTGCGGGATGAACACGCCGGGCAAAAGTGAAACGGGGGAGGATGGTG
GATTTTGAAGAGATAGAGCGTGAGAGAGGGCAGAAGGCCCATCGCGCATTTTCTCCTCTA
CCCCTTAATTTCTCCAATCCACCTCGGATCCCTAACCCTCCCCATCATAAAACCTCTACT
TCTCTTCCCTATCCCCTTCCCTTCCCTTTACTCTCTTCTCTCATGACAAAATCCTCTAAT
ACCCAAGCTGAATCCGCGACTTCCAATTCGGATCGAGCGTCTCTTCTAGCGCGAGGACCA
TAGCCGTCCTAGTCGGCACATAAACCTGCAAGAAATTCTTCCGGCCATTCCACTCGAAAT
CCGTGGTAAAGAACCGACTCGCCTCGCCATCGTCCACCCGGCCCAATCCGCCGAAACGGG
GGGAATCCGTATTCAAGACGATGCGATAAGTCCCCGCCTGCTGGACGCCGACGCGGTAAT
CGGTAAAGGAGCTCGAAGGGTGGAAGTTGAAGATCCAGAGTAAGCCCGCGCGCTCGAAGA
CGATGACTTTGTCCCCTTCGTGTTTGAGGGAGATGTAGGCCTGCGGGGAGTGCAGCCAGC
CGTATTTCGCTTCCGAGTGCTGCATGGCGGCGTCGAAGTCGTTGAGGAAGTGGTAGCGCA
GTAAAGGGTCGTCGACGAGATTGAATTGGCGGCGGGCGTAGTGGAAGGAGTTGTCGTTGC
CCTCGCGCGGGAAGTCGAGCCATTCCGGGTGTCCGAACTCGTTGCCTTCGAAGTTCAGGT
AGGCTTCGCCGCCGAGCCCGTGCGTGATCAGCCGGATCATCTTGTGCAGCGCCATGCCGC
GTTCGATGACGGGGGTGAATTCCGACAGCGTCGACATGTGCGTGTACATCTGGGCGTCGC
AGAGCCAGAAGAGGAGGGTCTTGTCGCCGACGAGGGCTTGGTCGTGGGATTCGGCGTAGG
CGATGGTTTTTTCGCCGTGGCGACGGTTGGTCAGGGTGAAGCAGAGGTTGCCCATGTCCC
AGTCGATGTCTTGCTTCTCTTTCAGCCATTTGATGTAGAGGTCTGGTACGGCCATGGCGA
GTCGGTA
>MATOU-v1_1295056
TGAAAGTTTCTCTGGTTGAACTGTACATGCCTTCAAAACGAGTACATAGAAAGGATTTCA
GCCTTATGGGGCATGTTACTTTGCCACGAGTACCTCCCAATTGAAAAGGCGACGCAATTA
AACACCTAATGGCACCTTATCCCTGGCTTCAGTAGCACCTTTTCTCTTTTTCTGAGCGGT
GAAATATGCCGATAAATTATATAATAGCAAGACTGACTGACTGACCATGCGAGTCCGCGT
AAACGCTATCAAAGGCAAGATCCGCTTTCTCTTTTCGTATTATTCTCTTTCCAACGCGTT
GATGAGTCGTGGATGTGAAGGTTTTACAGCATAAGCATCCCGAAGCCAGAGACGGCCGCA
ACAGTGGCCATGAAGGCGACGGGGAGGATGCCGAATTCAACGCTGGGGATGGCGGTCATG
GAGCCGGAGGAGCCGCTTGAAGAGCCGCTGCTGTCCGAGTTGGAGCCAGAGCCAGAACCG
CCGGTCTCGCTAGATGCAGCACCCGCGCCAGTGACGCTTGGCTGGACGGAGACAGAGTTA
GTGCCAGCGGAGCCAGCCATCTGCAGAAGGGAAGAGCAAGTGGCACCAGGGGCCTGAGTA
GCCTTGGTGGTGGCAGAGCCGTCGAAGTCGCAAGCGGAAGCCTGGTTGGAGCCGGACTGG
GCCTGGTAATACTGGTTCAGAACGAAAGCGATCTGTTCGGTGGAGTTGCACATGCTGTAC
GCGCCGTAGTTGCCAGTAGTGGCGTTGGCGGTGATGCCGTCACATTGAGAGCCATCGCCT
AGACCGCAGACGGTGCCGAAGAGGTCACCGTAGTTGTCCTGGTCAACATCGGACGAGATG
ACACACTTCAAGCTGTTGTACATGCAAGAACAAAGCTCCTGATTCGGGGTAGGCGGCAGA
GGAGTAGCCTTGGCGGCCCAGGAAGAGGTGCTGACCTCAGGGCACTCAGCCGGAGATGCG
GTCGGGTTGTAGGCGCTCATCTGAGTGCCAGTGGCGGAGACCTTGGAAAGCTGGCTGGCG
AGGTTCGAAAAGTCCTGGTTGGGCTTGACGCTGTCGCCGTCAACGCTGACGAGACCGTAG
TCATTATCCTCCTGGAAGTACATGTAGACAATACCGCCGGACCAGACGTCGTTCATCTTG
TCGCCGTAGAGGACCGGGGTGTCAGTGAAGTCACGAGGAGAGACCTCGTTGCAACCGTAC
TCTGCGAAAAAGACAGGAACGGAGTAGGTGGAAAACTCCTTGGTGCGAACATCGTAGCCA
GACTCGGTGAATGAGGAGTCACCGCACCACGAGTAGATGTTGTAGCCCCAGAAGTCGATG
GCGTCCTCCTGGTCGCCGCAGTTGAAGTAGTTGGCCATGTTCTCACGGATATCCGCATCG
TCGTTGGTAGCATAACCGACGCCAATGTCACGGTAGCCTTGCTTCTTGATGTATGCCTTG
CTGTCGCGAACAGCAGCCTTTACGAACGCGCTGGCATCGGTGTTGTTTGGCTGGTTCGAA
ACCTCGTTACCGGCAAAGTATCCAAGGGTGTTTGAGTACTTGGACATTTCGTCGATGACG
GTAGTGTAACGCGCGTAAAGCTGGTCGTTCCAAGCAGGGCTGTTGCGGTTAATGGAGTTG
CCAGGCTGGGACAGATCTGCGACGACGTAGATGCCAGCATCCGCGAGCATGCTCATGGCC
TCCTGGTGGTCGTTCTCGGGGTTGACGGCGTACACACGGATGGTGTTGGTCATGAGCTGC
TTGAGGTAGGGAATGTCACGCTTGAGGTTGTCGACCTGCAGAGGGTCGGTGTACTGCTCG
TCATTGTCAGAGCTCGAGCTGTTTCCGCCGCCCTGGTAGTCCTGCTGGTATGCGACACCC
TTGATGTAGAATTGAGTGCCATTGGTCTTGTAGAAGAACTTGGAGCCCTTGATAACAATG
GGGTCCACGTCGTTCTGAGCGGCGGCCTGGCTCACGAAGAGCGAGGTGGTCGCCACCAAA
GCCGCCGCAGCGGATGCGATGCCGAAGCCTCTCATACTGGTTCTTTGTGACGGATTAAGA
TGCTATCGACCGGGGAGATATCTGATCGCGTTCGGGGCGCGATGAGACTGGGCTCGCGCG
CAAAAGAAGAGGGCAACCACGAATTCGCTTGTAGCTGCGACAAGCTATGAGATGAAAGAG
CGTAGAGAAGGTGTGGCCGACGACCAACAATTGCCAAGGT
>MATOU-v1_1295058
GAAAATTTCTCTTGTTGAACTGTACATGCCTTCAAAACGAGTACATAAAAAGAATTCCAG
CCTTATGGAGCATGTTACTTTGCCACAGGTACCTCCCAGCTAAAAGGAAACGCGATTAAA
CACCTCACGGCACCTTACCCATGGCTTCAATAGCACACTTTCTTGTTTTCTTGTGTGGTG
GAAATTGCCGGCAAAATTATATAATAGCAAGACTGACTGACTGCGATGAGTCCGCGTAAA
CGCTATCAAAGGCAAGATCCGCTTTCGCTTTCCCGTTTCGTTTTCTTTCCAACGCGTTGA
AGAATCGTGCATGGTGAAGCTCTTACAGCAGGAGCATGCCGAAGCCAGAGACGGCCGCAA
CAGTAGCCATGAAGGCAACGGGGAGGATGCCGAATTCAACGCTGGGGACAGCGGTCATAG
AGCCGGAGGAGCCGCTGGAGGAGCCGCTGCTGTCGGAGTCGGAGCCAGAGCCAGAGCCAG
AGCCGCCAGTCTCGGTAGATGCAGCACCAGCGCCAGTGACGCTCGGCTGAACGGAGACAG
AGTTAGTGCCAGCGGAGCCAGCCATCTGAAGAAGAGAAGAGCAAGTTGGACCAGCGGACT
GAGTAGACTTGAGGGTGGCAGAGCCCTCGAAGTCGCAGGCGGAAGCCTGGTTAGAGCCGG
ACTGAGCCTGGTAGTACTGGTTCAGAACGAAAGCGATCTGTTCAGTGGAGTTGCACATGC
TGTACGCGCCGTAGTTGCCAGTAGTGGCGTTGGCAGCAATGCCGTCACACTGAGAGCCAT
CGCCGAGACCGCAAGCAAGGCCGAAGAGATCGCCGTAGTTGTCCTGGTCAACATCGGGAG
AGACAACGCATCTCAAGCTGTTGTACATGCAAGAGCAGAGCTCCTGGTTCGGGGTCGGCG
GTAGAGGGGTAGCCTTGGCAGCCCAGGAAGAGGTTTGGACTTCAGGGCACTCGGCCGGAG
ATGCGGTCGGGCTGTATGCGCTCATCTGAGTGCCAGTGACAGAGACCTTGGAAAGCTGGC
TAGCGAGGTTGCTGAAGCCCTGGTTTGGCTCGACACTGTCGCCATTGACACTGACAAGAC
CGTAGTCATTCTCCTCCTGGAAATACATGTAGACAATACCACCAGACCAGACGTCCTTCA
TCTTGTCACCGTACAGGACTGGAGTGTCAGTGAACTCACGAGGCTGAACCTCGTTGCAGC
CGTACTCTGCGAAAAATACCGGGACGGAATAGTTCGAGAATTCCTCAGTGCGAACGTCAT
AGCCAGACTCAGTGAAGGAGGAATCGCCGCACCACGAGTAGATGTTGTAACCCCAGAAAT
CAATGGCATTTTCCTGGTCACCGCAGTTGAAGTAGTTGGCCATATTCTCACGGATATCCG
CATCGTCGTTGGTAGCGTAACCAACACCAATCTCCCGGTAGCCCTGCTTCTTGATGTAGG
CCTTGCTGTCGCGAACAGCAGCCTTCACGAACGCGCTCGCATCGGTGTTGTTTGGCTGGT
TCGAGACCTCGTTACCGGCAAAGTATCCCAGGGTGTTGGAGTACTTAGACATTTCATCGA
TGACGGCAGTGTAACGCGCGTAAAGCTGGTCGTTCCAAGATGGGCTGTTGCGGTTGATGG
AGTTGTCGGGCTGAGACAGGTCTGCGACGACGTAGATGCCAGCATCCGCGAGCATGCCCA
TGGCCTCTTGGTGGTCAAGGTCGGGGTTCACAGCGTAGACACGGATGGTGTTGGTCATGA
GCTGCTTGAGGTAGGGAATGTCACGCTTGAGGTTGTCGACCTGCAGAGGGTCGGTGTACT
GCTCGTCATTGTCAGAGCTCGAGCTGTTTCCGCCGCCCTGGTAGTCCTGCTGGTATGCGA
CACCCTTGATGTAGAATTGAGTGCCATTGGTCTTGTAGAAGAACTTGGAGCCCTTGATAA
CAATGGGGTCCACGTCGTTCTGAGCGGCGGCCTGGCTCACGAAGAGCGAGGTGGTCGCCA
CCAAAGCCGCCGCAGCGGATGCGATGCCGAAGCCTCTCATACTGGTTCTTTGTGACGGAT
TAAGATGCTATCGACCGGGGAGATATCTGATCGCGTTCGGGGCGCGATGAGACTGGGCTC
GCGCGCAAAAGAAGAGGGCAACCACGAATTCGCTTGTAGCTGCGACAAGCTATGAGATGA
AAGAGCGTAGAGAAGGTGTGGCCGACGACCAACAATTGCCAAGGT
>MATOU-v1_1296361
ACCTACACATCTATCTCGGCGCAGAAACACAGTCGATCCACAACGATGTTCGGTCTCACA
GAGCTTTCTCTGCTCAGCCTTCTTGCTACGTCTGCAGTGGCCGAAGTACGATCCTACAAT
TTTACCATTCATGCCGGAGAAGCAGCGCCTGATGGATTCTCGCGCCCGGTCTACCTGATC
AACGGCCAGCAGCCTGCTCCGCTCATTGAAGCTGTTGAGGATGACACCCTAGAAGTGTTC
GTCAAGAATGAGCTTCCTGTCGAAACCACCTTACACTGGCACGGCATTCTTCAGCGTGGA
ACACCACACATGGACGGGGTCCCTGGTGTTACGCAGTACCCCATTGCACCTGGCGACAAT
TTCACGTATCGCTTCAAGTTGGAGAACGAGTACGGCTTCTACTGGTATCACTCCCATTTT
CGCGCTTATTACAACGATGCGATCCGTGGGCCAATAAACATCCTTCCCAAACGATCTCGC
GCTCGCCCCTTCGAGTCGCTTGCCTCTAGTGACGCCGACATCGAGACCCTGCTCCAGGCG
GAGCGCGATGCGTTCCCAGTCCTTCTTACGGACTGGTATCATAACTTGTCGGATATGGTT
CTTCGTGAATATAATCGTACGGGCGTGTTCCCGCACTGCATCAACAGCTTGCTTGCCAAT
GGAATGGGCAGAGTGCAGTGTCTGCCTCGAAACATTCTGGATTGCGGGCCAGACCTGTGC
TTGGGACCTAATGATTCCGGTTCGATGTTAACGACACCATCCGACGCTATCGAAATGTCC
ATGTCATCTTCTGCAGCGTCGCTGGACATGAGCTCGTTGGACCGCATGGCGAATGCACAA
TCGACATCGGACGAGATGGCCATGTCATCTTCTGCAGCGTCGCCGGACATCAGCTCGATG
GAGGGTATGGCGAACGCAGAATCGACATCGGACGAAATGATCATGACAGTGCCATTACGG
CGGAGTCCTAGTACGCAACCCCAGGGACAGCGAAAGAGACAGATGATGGATATGTCAGGC
ATGGGCACGTCCCTGGGCCCCCGCGGTTGTATCCCGCCTACAATGTTCAGGCCTGGATAC
AATGCCAGCGATCTTCCTCCGGAGACTTGCGCCGAAACTATGGCGCCTCTGCTTAAGATC
CCAGCAAGTTCTTCCTTAGGTTGGCTGGCCCTCCATCTCGTGAATGCTGGCTCCACCACA
AAGTTGACGGTGTCGTTGGATTCACATACAATGTTCGTATATGCGGCCGACGGACTCTTC
GTAAGAATGCAAGAGGTCGAGGTACTGCCCATGGGTATCGGCGAACGCTACTCAGTGATG
GTCAAGCTTGATCAGAGGCCTGGCGATTACTATCTTCGGTTCGCTGCGACTCCCCTCGGA
GATATGCAACAAATTGTCGAGGACGCTGCAGTGGTGCAGTACGAAAGGGGCGTCCATGAG
AGCTCTATGACTGCTATGGAGTCATCTCCTGAGCCGAGTGACAATCAAACGCTGTCGGTT
CTTGATGGAGACACTAGTGGCGTGCACGTGCTGCTGAATGGCTCTGCCAAAACTACGGCT
TCCACCTTACGGTCGCAGAATCTTGCGCCCTTTGACCGCATTGcccccccACCCCACGCC
AACGTCACGAAGAGCTTCAACATCAGCCAAACCGGAATCGTATCATGGGTTGTCGATAGA
TACGTTTATTCAGAGCCCGAGACACCGGTAATATATGGGAACGCTTCGGACGGATGGAAC
GCCAATACGACACTCCACATGCCCTTCAATGCAAGTATCGATTTGATTATGAGAATTGCA
CCTGACTCTATGGACACGATGGGGCATCCTATGCATCTCCACGGCCACAAGTTTTGGATC
CTAGGCAGCGGTGATGATGATTTCCCTTATTCGTCCACTCAGGATGTGCCAAGCTCTTTG
GTCAACCTTGATGACCCGCCGTACCGTGATACAGTCGAGCTGCCTCCCTCAGGCTGGGCA
GTCATACGTTACGTGTCTGACAATCCGGGTGCTTGGCTCCTTCACTGTCATGTACAGTGG
CATCTTGTGAGTGGAATGGCTCTGGTGCTCGTGGAGGGTGAAGGCCGTCTCCCTGCTCTG
CTTGACTCCGCGGGGGTAGAACGCCCGACCAACGTTCTTAGCTCGCCTTCGGCAAACGCT
GCGCAGTCGAGCTCTCCTGCCCGGGCACTAGCTTCTGAGCTTACATTCCTGAAAGCGACT
GTGTTTCTCGCTTTCTTCACTTCGTTAGTGTAAGCTTCAGGGGCTGTGTAAGTGGAAATG
TGAAGCAAGGCGGACCTTCCCCATTGCGTCAGAACCTGAGCAGTTGACAGTCATTGAAGG
TTTCCCgggggggAGTCGCCTTCTTTCGCTTTCTACTTTTGTTCTGGAGCGCATGTGAGC
GGCTCCTGCACTGCGAAGCGGAGATGTATTGGTGCTCGATGGTTACATATAGGAAGTTAA
ATGAACAGAGGAACCCCGAATACGCTTGGTCCTGGTTTGTTCAGCC
>MATOU-v1_1297572
CAGAGCATGTCGCAACACTCCCTACACGCGGATGTGTTGGGAGGCAGGCTTCAGCATCGC
TACTGATTTCGATGCGAAAGCCCCTCCAGTCGGAAAGACGGTCACTCACAATCTTGAGAT
CACCAATACGACGCTCGCACCCGATGGAATTTCAAGGCTGGTAATGGCAGTGAATGGTCA
ATATCCTGGCCCTGCCCTGACTGCATCTTGGGGCGATACCATGGTAATCAACGTGAAGAA
CTCGCTCCAGCATAACGGCACATCAGTGCATTTCCATGGAGTCCGACAGCTTAACTCCAA
CCAGCAAGACGGAAGCAATGGCGTCACCGAATGTCCCATTGCTCCGGGCGAAACCAAGCA
GTATCGCTTCCGATGCACTCAATTCGGCACCGGCTGGTATCATTCTCACTTTTCTGCACA
GTACGGGGATGGTGTTGTAGGACCGATTGTTATTGACGGCCCGGCGACGTCCAACTACGA
TGAAGATCTTGGCCCAATGTCCTTGACGGACTGGTACTACGACACGGCCTTTACATTACA
CCATCGCTATGCACACACGACCAATGGACCCGCGGTCCCACCCACGGGGCTGATCAACGG
CATGATGAAGAGTGCACAGGGAGGACAGTATCACGTCACCCGAGTCAAGAAGGGCAAGAA
GTATCGCCTGCGCCTGATCAACACGGGCATCAACCAACACTTCCACGTCTCCATCGACAA
CCACAAGCTCACAGTCATCGCTTCGGATTTTGTGCCCATCAAACCCTACGTGACAGACTC
GGTCTCCATCGGGATCGGCCAGCGCCACGACGTCGTCTTCCACGCGAACCAGGACGCGGG
TAACTACTGGATTCGCGCTGACATAGGCAACTGCGGCCGAAACGCAAACGCCGGGAACAT
TCGAAGCATCGTGCGCTATGATGGCGCCTCAAACTCCGATCCCACCACCTCCGGCGTCTC
GAAGGACCTGTCCTGCCGCGATGAGTCCGTCCGACCCTATGTCGATAACACCGTGCCGCG
CGACCAGTTCTCGAGGGCCGTCAGAAGGCTCTCCACGGACTTCAACGTGGAAACCTCCGA
TGGAAGGCTGGTACAATGGCTCATCAACGGATCAGACATCCGCGTCGACTGGGAGAAGCC
GACACTGCAGTACGTTCTCAACGGCAACTCCGCTTTCCCCGACGAACTGAATCTGTACGA
GATCAACGGGGCGGATGAATGGTCCTTCTGGGTCATCCAGTCCGTCCAAGACGACCCCTT
CAACACCGAGCACCCGATCCACCTGCACGGGCACGACTTCTACGTGCTAGGCCAGGGCAC
GGGAGTCTGGGACGGCGACTCGTCGAACTTGATGTTCTCGAACCCGCCGCGTCGGGACAC
AGCGCAGCTGCCAGCGCGCGGGTATCTGATTCTGGGCTTCCCGATGGATAATCCAGGAGC
CTGGTTAATGCATTGTCATATTCCCTGGCACGTGGGACAGGGGTTCAGTCACCAGTTCCT
GGAGCGTAAGGATGAGATTTTGGGTGCCATTGGTGATATGAGTTCCTTCTCCAACGGCTG
CGATTCGTGGCGGAGCTATTGGAATAGCCCTGCGCGCGTTTATGACCAAGAGGATTCCGG
ATTGTGAGGAGCGATCTAGATGTAGTTGAGTTTATGAATATTGGCAA
>MATOU-v1_1298728
CATCTGTCTTCGGACAAGCAGACTCTCATCGGGACTTGTGCCGTGCAAAACATTGCGTTC
CATAAGGCAGTGGCAGCCCGCTTCACGCTTGACCATTGGAAGACGACTTCGGAAGTGACA
GGCGAGTACCAGCACGACCCGCGCAGCTCGAATGACGGCTGTGACCGGTTTAGCTTCCAG
ATCAAGCTTTCCGACCAGGCGAACATTGACGACAAAACACTACTGATTTGCGTGCGATAT
ACTGTCAATGGCCAGGAATACTGGGACAACAACAAGGGGATGAATTATCAGGTCGAGTTC
ATCAAGGCGGTCAGGAAGACCAAGCCCTCTGTAGTAGTCACTGGTCTAGGGGCTAGACCG
CACACTTCGCTCCCACGCAGCCGGCATTCGCCACCCTCTTCATCGCGAGGTCAAAAGCCG
TCGCTCGACGATGATTTTACTCGCCTTGACTCCAGCGCATCGTATTCATTTGGTGGCAAT
GACACTCTGCTCGACGAGTCAGGGGGCTCGATCAAGCTCAAACCACGCACCAAGCGTGGT
AGCGCATTCCCATCAAACAACGCTGGTCAGCATCCGGCGAACGGGCTTGGTGGACGCTAC
GACTTTGGCGCTTCTCTCTCGGCAGCACTCTCTTCTGCTCAGGACAAGCTTGGTCGCGAG
AGCGGGCTTATGAACCCCGCTCAGAAGCAAAGCGGTGGCAGCTACTTCGGCCCACTGGAC
CGCAAGGAAGGCCCGACAAAGGCGGACGAGCGTCCCGATGCTCTGACAACCGATAGGCCC
GCCATGGGCTCCGACCAGTACCGCGACCTTGTCCAAAAATTCTGCTACTTCACTCCTGGC
TCTGGAAAGGGCCCACGCTCGCCGCAGCCTGCTGATACTCCGGAGTCTGCTGCTGCGCCG
ATCAAGACGGACGGTACGCTCGAGTCCGCAAGCACATCCCGATCTTCCACCAACAGTTCC
TCGCCGCAGCTCGACGGCAACAATGAGCGTGCGGTCCCGGCTTCCAACCCATTCGTTTCT
CGTTCAGGCTCGCCGGCACCTGTCACTGGTGGAGGGCTCGGAGCTCGCTCGACCACCCCA
ATCAGCTTTGGATATCCTTATCACAGCTCAGGCCGCGATGGCTATCTCTCCGACTCGCCC
ACGCCCACTGCAATTCGCGGCTAGTAGTCGTAAATTCAGTGATCGTCACGGCCCTCCATT
CTTATTTTTACCTTCTCAACATTGTTCTACGACTCTGAAGAAAGGGTGGAGATTCGGCGA
ATACCACCGCAGACGATCACGGCATCACGATAAAACGACAAACAAACGGACATTGCGTAT
ACTTCTTCGGTCGGCTGGAGGTCAACCCTCTCCACAATGAAGAACGACTTTCCACGTTGA
GCAGGAGATCAGCATGGGTTTCCTTGCGTATACTCCTCTTCTCTCTCGCGCATACGAGAC
TGCGGCTACTACTTTGTTTTAATGCACTTCTAGCGAGATGGGTTGGCTTTTCGAATCAGC
AACACAGCATGGCGTTTTACTGGGAATGGGACATAGATCCGACTTTTGCTTTCGTCCCCT
TTTCTTTGACCTGGGGAGGCAGCGGCGGTTGTTCTTGTTTGAGGCTTCTCAAAAGCGGGA
AAATTGTTATCCTTTTGATTGGCTTTTGAGATGCGCGCGACCTTCCTTCTCCGCTTCGGA
CATGATGGGAGAGGGGACGTTTGCCGTTTGGTTGTCTCTTTTCACTTTCATTGGCAGGAC
ATCATGAAATCGGACTGTGCATACATTGGTGGGCGGCTCTGGGGTGTGGAGACTGGGAAA
ACCCCCCTATGGATACGTGTGGGAAAGGGCAAACGGCTACGCGGGTTTGGCATGGGCAAT
GGAAGGGATTACAGTGTCATAGTTGCAAATGCCTAGTATTGA
>MATOU-v1_1298742
ACATGGGGGAGTCCTTTCTTAATTTCGCCTTAACACTCCGGTGCTTCATGATGAGGTCGA
GGCGAGGTCTCTTCACTGCAACGCTGGCATTCGCGGCCACTGTCACCTCCGCACTGGGTG
TTCGCAATTATGACGAACAGGGAGTCCTGGCCCCGGTCGAGCAAAGCATAACGAAGGCTA
CAGAACACACACATGAGGCCATACGTCCGACGGTCCTGAGCACGGAGCTGGTCACGACCA
CAGCACTTCCCGGCTCTGACACACCGGCCGAGCATTGGACGCCAGATCGCTATGATCCTT
ATGTCTGTGAGTATATGGGCGAAAACGGATGTTGGCAGCCCTCGGAGCCCGGTGACGGCC
CACCCTATTCTCACGATGGGAACTGGCCTTCGAGAAGCAAGACGTGTGCAGTAGAAGCTT
GTAATGACGAGAACGGAGATGATGCAAAGGCCATCCTCGCCGCGTTTGATGAATGTAAAG
AAGACGGTCACATCATCTTTGAAAACACGACTTACTATGTTGGCACTGTAATGAACACCA
CAGGTCTAAAGAATGTCGATATTGAACTGAAAGGTACCATGCTCTGGAGCACTGACATCG
AGTACTGGCTACAAGCCTCACTGCCTGTGGGCTTTCAAAACCAGACCTCTGCATGGCATC
TTGGTGGCGAAGGGATTCATTTCTTTGGTCATGGCGCGGGTACACTGGACGGCAATGGAC
AGGTCTGGTATGACTATAATCATGGCCAGTCGAACCTCCATGGAAGGCCACACGCCATCA
CAATCACTGAAACTAAAAACTCTGTCATTGAAGGCCTTCGTTTTGTAAAGTCTCAGATGT
GGACGATGACAGTAGCACGCTCCGAAAAAGTCTTACTGCAAGACATCTATGTCAACAACT
CGTCCGAGGACCGGGAATTCCGCTCGAATGTGAACACCGATGGCGTCGACACGGTATATG
CTAATAACATCACAATGTTGCGCTGGACTGTAGATTGTGGTGACGACTCCATCAGCATGA
AGCAAAACTCCACGAATATCTACATTGCCAACTCAACCTTCTATAATGGCATTGGGTTCG
CCATGGGGTCCATCGGACAGTACCCAGGCCAGATTGAGGTAATCGAGAATGTGACAGCCG
AGAATATTGTCACCTACAACTCTCGCATGGGTGGAAGAGTAAAGACCTGGACCGGCCTCA
ACACTGGCTATCCACCGAATGGAGGAGGCGGAGGATTTGGCCACGCGAAGAACATTACCT
TCCGTAACTTCGAACTGCACAACGCACAGCAAGCATGGGCTATCACTCAATGCACCTCTT
ACAACGGCGTCAAAGGCGGTTGTGACACAAGTCGCTTTAAGATTGAGGGCATGTACTGGG
GCAACGTCACCGGTACCATCACGGGGACGAACGTTGCTACTCTACAATGCAGTAAGGCAA
CCCTCTGTGAAAACATCGAATTGGTCGGGAATCATGTCGTGCGAGCTGGAAGCCAAGACG
AGGTGAAAGGCTACCTTTGCAGCAATGTTCATGGCAAGAAGGGCTTTGATTGCACAGGCG
ACTGTGATCAAAATAGATGCCCGCACTGAGTAGTTGAGGCGAAAGCGTGCGGGAAACTCA
ACGTCAGATTGTCAGCCTCGGGAACCCGTACCTCTGTTGCGGAATTCGATTTGAATTCTT
CTCTGGCGGATGATTGCCATTTTGATTTCTGGAACGCCCAACCACAATTCCAAAAATCAT
CAAAAACTCAAGTAAAGATGGATTTTCTTCTGCTTTAGTGTAAAACAGAATGATGGTGAA
GAAATGTGGCGGGAGTCCAATAATACTCGTACAACATTGCATCTATATCTTT
>MATOU-v1_1298857
GAGTAGGAGCTAATGAACATGAGTGGCAAGAACTCCAACCTCGCTCCGAAGATCATTTGA
TGAAACAACGAGCAGTACGCGATCAGAGGAATGGCCACTGCAATATACAGCAGTGAGAAT
CGGTCCAGGAGGAAGACTCGAGGCTTCTCAGATGCAGGCGCCAATCGATCGAATGCTAGC
AAGAACACTACCAGCCATAGAATAGTGTACACAACTTTGATCGGGAACTCCACTGCTGTA
AAGAGGAGCGGAAACAAGCTCACGTGACCACTCACGGCCAGAGGTCGAAATGCACCAAGA
TATCGTCGATCTTTCAGAGCGAGCAAGCTGAACGGAATGATGACAAGCAGTATCGCTTTC
TCGTGGACGTGCCAGCCGAACAGAAAGGAGGCGTAAGCACATAGAGTGATTGTACCGACG
AAGTTGTCCCAAGTGGCGGCGAAGAAGAGTTTAGCGAGAGCAGGAATTTGCGCCGCTAAG
GTCAGAATGAAAGTCATGCGCGGACTGATGTCCGGCAGCACCGCAAAAGCGGTGTCTCCT
ACTAGGCCTCGTGTAACGCTATGGACCGCATCAGCGTTTACCGGCAACTTCAAATAAGGC
GCAGCATAGATCAGCACCCGGTCTGTAAACGAGTACATGGCCCATACATTGGGAGCCCAA
TATGCATGGCAGAGACCTCTTGAAAAGGGAAATAACCTGCTCAGCAGCTGTGGCATTTGT
TCGTAGTAGACAAAGGGTCCGAAAGCGAGTACGGCGACGCTAATGATCCCGAGCCCGAGT
TTGACACAATTTGCGAACTTGATGCTGAAAATCGATCGCGGTCCGAGGCAGTACGCCCGA
AGCAGGTAGACAAAGTACGCCGGAGCCAAGTAAAGGTAGATGTGCTTCAGACAAAGTAGA
GCGGCGAACAATATGCCGCTCATCAATAAGCCAGACGAACGGCGGGCCTGGACAATAGAC
AGGATGAGGATGCCGTACAAGAAGCCATTATACTGGAAGTGGATATGGTCGATGATAAGA
AGGCCCGGCGACAGCAAAATCGATAGCGCCGAGCGTGTGCTTGCTTCTTCGTTCCAAGCG
GCGTCGACTTGATGAATTGGTGCAGAGCGAAGACAAGCACCAGCTCAGTCAGAATGACCG
TTGCCCGCTGAAACTGGACCGTCTGCCAACTATCATATCCGAGGTTGCTCACCTGGAGCA
TGCCTCTGTCAATATACTGCGCCGCCTGAGAGAGCAGCCATTCGAAAT
>MATOU-v1_1299225
CATACCCTACTGCTAGAGCGAAGGCCACGGCGTCTTTGTCGGATGAATCAATCCGGGCGT
CATTGCCTGCCCACACCTACCCCTAGGTAAGGTATAGGATTTAAATGGCGATGGGACACT
GCTTCTCACTCCTCACCGCACGCTATCTACCGTCGCCTCTGCACGAAGCTTTCATCTCAA
GCACTGCGGACATGAAGAGCTTCCTCAAGGTAGCCCTCTGCGGGCTCACCTACTTTACAT
CTGCTCTCGGTCAAAGCTGTCAGACTACCACCCTCAGGTCTACAGTGCCGTCTGACAGTA
ACGTTGCTCTCGGCAGCTACTCCTACTGTGGCGGCACCTTCAAAGCTACTGCGTACATCG
CAAATGTAAATTACAACAAGGTCGTCACGCTGTACTACACGAATCGGCAGAATGAGAGTA
CACCACTTTCCAGCTTGACGTTTGGCTACTCTAGCAGCATAGACGATGGCAGCTGGGAGC
TGTGGACCACAAGCACACCCGTTTACATTGATGGCATTACTGAGCTTCTCAACCTCACCT
ACCGAGCAACCGACATTGGCGAGACCTACGTGCAGCAGCTGGGCCTTCCCGTCGATGCCA
CTGGAGCACCAGAGCCGACTCTAGCAGCTCCTCCGGCGCCATACGCTTCGCCTCAGGGCT
TTAGTGATGATATCACCGACTGGCTCGCAGTCAAAGGGAACCCCAACGTGGACTCCGAAG
CCAAGCTTGCCTTCCAGCGCATGTTCTTGAACATTAATCCCGCTGTGGAAGGCGCAGTGG
ACGGTGTGGTTGTCGCTGCCCGAAGCGGTCCCAGTTACGAACAAAAGGATCCTGACTACG
AGTACACGTGGGTGAGAGACGCGTCGCTCACGATGGACGTGGTGGCAACCCTTTACTCAG
CTGCGACTAAGAGGAAGGTCAAGCAGCAGTATGAGGAAATTTTGTTTGAGTACGCTGGGG
CCAGGGCGACGGAACAGAACGACCCGGACCTGATCACTGGACTGGGTGAGCCAAAGTTCT
ATCTCAATAATACGGCCTTCACTGGCCCATGGGGTCGACCTCAGAATGATGGCCCTGCCA
CTTCTGCCATCACACTTATGGAGTTCGCGAATAGCTACTTAGAAGACGGTGGGGATGTGA
ACATCATCCAGGAGAGGGTATACGACTCGGCCACTTATCCTTCGGAAGCACCTGTCATGA
AGGATCTCCTCTTTGTGGCAAGCAACTGGTCTTCACCGTCTTTCGATCTTTGGGAGGAAG
AGGAGAGCGACCACTTCTACACTCGCATGGTACAACGTCGGGCGCTGGTCATGGGTTCGG
ACTTTGCCACCAAGATGGGAGACCCCAGTACATCCGCGATCCTGTCTTCCGCTGCCGATG
CATTGACTGATACACTGAGTCAATTCTGGGACCCCAACCGAGAGATTTTGCTGTACGAGT
ACGGTCCTGTGCTGAAGGGCAAGTCAAGCTACTTGGACATCGCGGTCGTGCTCGGCATTA
ATCATGGATACGCTGGCGATGGCGTCTACAGCTATACTAACGACGAGGTCCTATCATCGG
CTCTGCGTATCTCGACCTCGTTCCTCGACGTATACCCGATCGCTAGCACTCACACGGACT
CCTCGGGCCAAGTGCTTGGCATCCCTGTTGGTCGCTATCCCGAAGATGTGTACAACGGCA
CAGGAACCGAGGAGAATGGCGGTAACCCATGGTACCTCTGCACGGCTGCTATGGCACAAT
ACCTCTACTCAGCATCGAACGAATACAATGATGCGGGCAGTATCACCGTGACTGATGTCT
CAAAGTCCTTCTTCGACTACTTCGCACCGAACGCAGGTCTACAAGCTGGCCAGACGTACA
GGTCCCGCTCGAAGGAGTACAGGCAAGCAATCGACAGTCTACACGGCTGGGGCGATGCTT
TCATGCGGACGGTCAAGTACTACACGCCCGAAGATGGACACTTGGCCGAGGAGTACAACC
GCGACACTGGCGCCCCGCAGGGTGCTGGTGACCTGACGTGGAGTTATGCCAGCGTGCTTA
CTGCAGCATTTGCACGGGCGGAAGCGATTGGCCGCAAGCCGTATGTCAAGCATGTGGCGA
ATATCGGGGTGGAGCCAAACTCATGATAGGTCATTGCGATCTATCGGATTGGCGAATTAC
TGTAGTCTTAGACTGAGTGTCGGCACAGAAATGAAGACTCAAATTCAAC
>MATOU-v1_1300349
TTGACCGACGATCGAAGAGGAGTGTTACAGAGAGAAGGGGGTATCATGTCGTTGGTAGAC
TTGTGGGCGGTATTCAACAGGACTCGCAACGGCATTGAATTGATTTCGCCGCTGGACTTC
GAAAAGGCTGCATTAAAATGGGACGACTTGCGTTTACCTATTCGCCTTCGCCGTTTTAAG
AGCGGTCTTCTGGCCGTCCAAGAAAGCAGCCGTACTGACGCAAAGACTATCGCGAGCTTG
TTGAGCTGGTTGCGAGAATCGCAGGACGGGTCTCTGTCCTCTGCAGGTGATGCATATGGC
CAATCGTTCGGCCGAGGTGTCACAGCACAAGAGACTGCGGAGCGTTTCGGATGGAGCGTC
GGCGTTGCCACTGAGGAGTTGGAAATGGCCGAAGACACTGGAGCGCTATGCCGCGATCAG
TGCCTTGACGGTATCAGGTTCTGGGAAAATCACTTCACGCGGGAATCTGGTACAGGAGAA
ATTACGACAGCGGTACAGATGATGAGTGCATTGAACGTCTGAGCATGGTTTATGATACAT
AACATAACCCCCATTCACCGTAAAGTCTTCATGCTTCTTGATACCCATGCCTCCTGTCCC
ATGATTGTGCCTTTTAAGCCTAACGCCTTTGCTCTTGATCCCCCGAGAGCTAGAAAACAC
AAGCAAGCGGCAAAAGAAAGGAAATAAGAAATTCTATCGTTATCATTATCGGACTCATCG
ACCAATCGAGCTCCCGATGCTGCTCGGTGTCCAACTGCTTGCTTTCGAACTCATCCAGCT
TCCCGTACTGCTTACCCAAGACGGCGTGCTGAGCTTACTTCTCCACCCGCCGCCCAGCTT
CGGACCCTTGGGCTTATTGTCCCGCTTGGTCTGCATCTTCAACTTCCCTTCCATGAACGC
GTTGATGACGTTGATAGCCAAGAACGTCCCGGAACCGATGGCACGGAACAGCGCCAGGAT
GGCGACCGACCAGAGGATGAATTTGAGGTAGATGTTGTCCCCAATGTACGTGGTGCCGTA
GACTTCCGAGACCGCCATGGCGAGAATGGCATTGCACGTCAGCCAGACAATGACGACGTA
CGTCCGCACCGCGCGGTAGTAGTCCTCCTGTGCCTGGCTTTCGCTGATGCCGCCGGAAGG
CACCTCGATACGGTCTCGGAGGTTCCTCAGCGCCTCGTCGTAGCCGGAGTCAATGTCCAG
TTGCTCGGAAGGCATGTCGACCTCCACGGTTCCGTTCTTGTTGACTTTCGCCACGCCCAA
GTCCTTGGCAATGTTGTCACCCTTGGTGCCCCATGAGACGTCGTGGGCGTTACAGAACGC
GTAGACTTGTAGGGTGCAGAGGTATGAAGGGAGCAGCATGAAGTACTGGGCCGAACTCGT
GAACATGTGCCAGGGGTCGAGGTACAGGAAGCTCATGATGAAGTATAGCCCGATTGTCGA
GAGGATGGAGACGACCATGTTCGTGAAGAGGCTGTCGCTTAGCTTGACACCAGAGCCGCC
AGTGAACTGTATGACGACAATGTAGATCGAAGCGAAGGTCGTGTAGGCCATAATGACGGA
GAAGGTGACCATACTCCACAGGAACATTTTCTTTGCACCCTGCGGCCGGTTACCCATTGA
CAGTACGAATTGCATCATGATGCATAGTACGCAGCAGTACCGCAAGAAGATGAAGATACC
CCGTCCCACGTGGTGCCCGAACGGATCCATCTTCTCGTCGGCGAGAGAGCCGGCGACGAA
ATAAAAGGTCAGGTAGAAGTTGCCGAGCGAGAAGAAGGTGAAGAGCAGCTGGATAAATTG
GTAGACGAATTCGATATGCAGTAGGAACTTGCGTGCGAGGGTATGGTCCGTCATCCAGAC
CTGCTTGAAGTGGAGTAGACCGTAGACGGCTGCGAAGAATGCGCCGTTCAGCCAGCGACG
ACGCTGAGAGATG
>MATOU-v1_1300399
CCGGTGCAGCAGACACCTCCGTCGCAGCGGCCTGACATGTTGCAGCGAGCGCCGATTTCT
CGCGGCCATTCGTATAATGATGACGCGTATCATGACTTTCATCCAAACGATATTGCAGAC
GACGGAGATGACGTTTTTGACGACAGGTCGCGAGAGAGACGGCCCAACGGGCCTGCCGCT
GGAGCAGGCTTGGCAGGAGGTGCAGCAGCTGGTGGACTTTTCAGATCTCTCAGCACCCGA
GGCGGCGGTGGTGGTGGTGGCGAAATGGGATGCGCGGCAGTCAAGATGACTTTGGTCGAT
ATGATGAAAAAAGCTCATGGCTTGAAAAGCAGAAGAGCGGGGGAAGGAAGATGAAGATTA
TCATTGGCAGTATTATCGCGTTGGTCGTGATAGCTGTCATTGTAGGCGGGGCTGCGGGCG
GCGTTCTGGCTAACAAAGGCTCCTCCAATGGCGACAGTGACGTGAGCAGTCTTGCTTCGG
ACAACGGCGACGATAGCGATGACAGCAGTTCTTCGTCCGGCTCTAAAGACGGGAACGACA
AATTATATGATATCAATTCGAAGCAAGTCCAGGAGGTACTCGACAACGACGCTCTGCATA
AGGTCTTCCCTGGGATGGATTACACGCCATATAATGCACAGTACCCGGATTGCTTGACGA
CCCCACCGGACCAGAACAATATCACACTCGACATGGCAGTTCTATCTCAGCTCACTCCAG
CTGTCAGGCTGTACGGCACAGACTGCAAGCAGACTGAAATGGTACTTACTGCCATCGACC
GGCTTGGTTACAACGATACACTGAAAGTGTGGATGGGCGTCTGGCTAGGTGACAACTCGA
CGACCAACACTCGGCAGCTGGAGCAGATGTATGACATCCTGGATACCTATCCGAGCTCCC
ACTTTGCAGGTGTGATCGTCGGTAACGAGGTGCTCTTCCGAGAAGACCTCACCGAGAATG
AACTCGGCAACCAGCTTCGCAACGTGCGTAAGAATTTAACAGCACGCAACATCGACCTGC
CGGTGGCGACATCTGACCTAGGGGACGACTGGACCACCAGTTTAGCAGCCGACACAGACA
TTGTCATGGCCAACGTCCATCCCTTCTTCGCCGGCGTGACGCCCGAAGAGGCCCCCGGAT
GGACGTGGACGTTCTGGCAAGGCCACGATGTCATCCTCACGAGCGAGGCGCCCAACGGTG
CCGCCTACCCTAAACACATCATCTCCGAGGTCGGATGGCCAAGTGCGGGAGGCAACAATT
GCGGGACAGAAAAGGGCTGTCCGAACGATACCGCGGGTGCTGTCGCGAGCGTCGAGAATA
TGAACACGTTCATGGAGGGATGGGTCTGTGAGTCCTTGACCAATGGGACTGCGTATTTCT
GGTTCGAGGCCTTTGATGAGCCGTGGAAAGTCATCTTCAACACGAAGAACGATCAGTGGG
AGTCGAAATGGGGGCTGATGGATCCTAATCGCAACATCAAGGATGGATTGAAGATCCCGG
ATTGTGGTGGAAGGACTGTGGATAAGCCGTATTGATTTGTACTTAGTATCCATTGATGAG
TTTGTTGACGACTTGGGGGCGTTTTTGATGAATGAATTCTGCATGGCGTAGAAGGGTCTG
TCAATCCGGAATTTAATGTGGGAGTTGGTCGAAAGCAGCCATAGCACATAGTGCACAATG
ATGCCATGAATGGCTTGACGGCCATGTTGTGACGTT
>MATOU-v1_1300412
ACATGGGGGACCAATACGGACAGCAGAGGATGCCGGGAGACATATGGGATCAGAGTGAAG
ATGATTGGGGGATGCCGGTGAATCGCCGGATTACCTCAAAGGATTTTTCTATCTGGTCAC
CCCGACGCCACCGGAGATCATGGCCGTATCTTGGATTTGGACTGCTGGTGTTGATTTGGT
GGATGTGGCCTGCCAGCACCGCTGTTGACTGGTCACGATACGCATATGTCACCTATGCTA
CGAACGACGCTAACATGTGTAACGCGTTCATGATGTTCGAATCCTTGCATCGACTTGGGA
GCAAAGCGGATCGTGTATTGTTGCATAATCCTCAATGGATTGATCGTGCTCAGGGTGGCA
TGGACAGGAATGCACAGCTCATGAGCCTCGCAGCGAAGAGGTACAATGTCAAGCTAAGAC
CTGCACGGCTCCTGGACGAGCGAGGCGAGCATACCGAAGTCACAAGCGACGGAATGTCTA
CCTGGGATACTTCGGTCACCAAGCTCCGTGCCTTCGAGCTGACAGAGTACGATCGCGTTC
TGCACATCGACAGCGACAGCACCATTCTGCAGCACATGGATGAACTCTTCCTAGCACCCA
AAGCGCCAATAGCAATGCCTAGAGCATATTGGACCGACGAGGTCGTCGGGCGTTGGCCTC
TCACTTCTCTCATGATGCTCATCGAACCAAATCCGCTAGAGCTTCGAGGAATGCTGGACA
CTTTACGCTCCTGGTGGATGGATCAATCACCCGATAAGACGCACGGCTACGACATGGAGC
TCCTCAATCAGCGTTTCGGCGCGTCCGCTATGGTCTTGCCTCATCGACCGTACGCTTTGC
TCACCTCGGAGTTCCGAAACACAGATCACTCAGCATACCTTGGCACCATCAATGCCCCGG
CTCCGATGAGACACAAATGGGATCCGGATGCAGTCCTCAAGGAGGCGAAGCTAGTCCACT
TCTCCGATTGGCCTTTACCAAAGCCCTGGGTAATGTGGCCTCATGATGCAGTGACGGAGA
TCCAGCCGAACTGCACCAAGATGGGATCGGACAGCTATCAATACTCTTGCCGGGAGCGAG
AGATCTGGAAGGATTTGTACAATGATTTTCGGAAGAGGAGGAAGGACCATTGTAGGCTAC
TTAGTGCCACGGCACCGAACTGGCCGAGTTGGAAGAAGACGGTTGGCGCAGAATGAGGAC
GCCAGGGGTGAGATTCTTGTATGAGCGTTTACACGACGTTGAAAATGTATGATAGGTCTG
AAAATGAAAGCAAACAGGAATACAGTACGACGAATCGCTGGCTATCTGCATTGAGCATCC
AATTCCATCCGAGTGTCGAAAACGAATCCGTAAGCTTATATGTCTTCCTCGAACTTCCTG
ACACTGAGCCCCTTGTCCCCGAGCACCTCCTTGACCTGTCGCACAGTCCATTCGCCTCTG
TGAAACATACCTGCGCCTAGAGCGGCATCTACCGGCGTCTGGTCGAATACTTCGGCAAAG
TGATCCGCATTCCCTGCACCGCTTGACGCGATGACCGGGATGCGGACAGCCGACTTGATA
CTCCTGATCAGCTCGAGATCAAAGCCAGAGTTCGTACCGTCCTTGTCGATGCAGTTGAGT
AAGATTTCGCCGCAACCCATGGCCTCGACGGCCGTTACCAGCTGTACGGCATCTAGGTCG
GCGGTCTTCCGTCCGCCTTGGAGCGTGCATGCGTACCAGCAGTATTCTTCCCCGTTCGGC
CCAGGGGTGGAAGTCTTCACCGTGTGGTGGGTTGTCTCGCTCGGGTCTTTCACGTACACT
CTTTTAGGATCAATTGAGACGACTACGGCTTGCGCGCCGTATGCCTCAGAGATGGTCTCG
ATCGCCGTCTTCCCGGTCAGTTTCCGCTCTGATGCGAAGTACTCTTCCGCGGCGGTGACG
GCGTCAGAACCGATTGAGACTTTGTCAGCGCCGGATTTGAAGTACAGACTGGCGACTTCG
AGGGCTGGACGGGTAGTGCCAGTCTCCGGGTCGACAGTGTCCCGTATGCCACCACCGATC
GTCAGGGGGACGAATGTCGTAGCTGCGGTTTGACGGAGGACTTCAAGCATAGGCAGATCC
TTCAGCGGCGTGTCCCGGAACGACGTAATATTTAGGAAAGTGACTTCGTCGGCGCCTTGT
TCGTAGTACTGCTGCGCCTTCTGTACGGGTTTGCCGAGATTCCGAACGTTCTTGTCGCCT
GCTTTGTCGCGGACGTCGTACTGGTCGCCTTTGGTGACCACAAGATCGCCTTGGTCGTTG
CTCCGGACGTCGAGACATGCGATGATGCGTCGTGTCAGGCCATCTGCTGCTTTTGTAGTA
CCGGCTGGTAAAGGCGCAGTTTTGCGGCCTTCGAGGAATGCTTTGATGACTCTCAAGCCT
GCGGCGCCGGACTTTTCGGGGTGGAACTGAGTCGCCATGATGTTGTCGCGGGCAATTGCT
CCGATGAACTCTTCGGAGCCATATCGTGCCGTGGCAACCGTCCAGCCTTCCTTCTCAAGC
TCGCCCGGGTTGTAAGGGGCGGCATAAGAGTGGACGTAGTAATACTTGGAGTCTGGCCGC
AGCCCATAGATACTGACGCCATCGCTCTCAGTCGTTGAAGATGTGTTAGCAGAGTTCCAG
CCAATGTGTGGGACACTCTTGTTTTCGTCCTTGAATCGGCGAAGTTGGCCCTTGATCACA
CCGAGACCGGGGACGGAAGCATTTTCTGTCGAGCCTTCAAATAGCGCTTGGAGACCGACA
CAGATGCCCATGAATGGCTTCCCGGACTCAATGTATGCTTTGACAGGTTCGACATAGCCG
GCATTGGCAAATTGAGTCAGGCAGTGACCAAAGTGGCCAACGCCTGGCAATATAAGTTTC
T
>MATOU-v1_1300977
ACATGGGGAACCAACTCCCTTCTTCGAGATTAGGTGAAACGACTTTCTGCAACGATGCAT
ATCAAACAAGTGCTTCCTCTTGCACTGGCCGGCCTCGCTGCTGCGGGCGGCAAGGGCAAA
GGTCCCAAGGGGCCGCCAGGCCTTCAGCTCGCAATGAACAAGCAGCACAAGGACTACTTT
GGCGTTGCAATCACGCCACGCAACGACACCCAGGAGCAGGCTATTATCAACAACCGGAAG
GACTTCGGCTCCGTGACTCCTGAGAACGCCATGAAGTGGGAGGTGACCGAGCCGAACCAA
AACGAATTTACCTTTGACGCTGCGGACGAGGTCGTCGAGATTGCGGACTCCAATCATCAA
GACGTCCATTGTCACACCTTGGTATGGCACAGCCAATTGCCTGCTTGGGTCAGCGGGGGT
AACTTCGACAACGAAACCCTTATCGAGGTCATGCGTAACCACATCACGAACGTGGCCGGC
CGGTACAAGAACGCTTGTACCCGATGGGACGTCGTCAACGAGGCCCTCAACGAGGACGGT
ACCTACCGCGAGTCGGTGTTCTACAACACCATTGGCGAGGCCTTTATCCCCATCGCTTTC
CAGATTGCCGCTGAGGTCACCCCGAACAGCAAGCTCTACTACAACGACTACAACTTGGAG
TACAATGGTGACAAGACTGCCGGTGCCCGCCGCATTGTCGACCTCGTTCAGTCTTACGGC
GTCCGCATCGATGGTGTTGGTCTCCAGGCCCACCTGACTTCGGAAGGCACTGCGAGCTCC
GGCGGTGGTGTGACTCCTAGCACTGAGACCCTGACAACAGTCCTGAAGGGCTTCACCTCG
AAGGGCGTCGATGTCGCCTACACTGAGCTCGATGTGCGATTCACACTGCCGGTCACCGAC
GAGGATCTCCAGCAGCAAGCCGATGCCTACGCCCGCGTGACCCAGAGCTGCCTGAACGTC
AGGAGGTGTCGCGAGATTACTGTTTGGGGTGCTGTCGACAAGTACTCGTGGATCCCAGGC
GTTTTCCCTGGCGAGGGCGCCGCGCTGATGTGGAACGACGACTACGAGAAGAAGCCTGCC
TACTACGCCGTGCTTGACAAGCTGCAGCAGAAGCCTAAGCGCTCGTGAAAGTAGCGCTTG
CCGGGCTTTCGTGGAGCTGGTAACATTGTGACCAGTAGATAGCTGAAGATCGGTTTGAAA
CCTCTCGACCGCAATCATTCTTTAGTAAGCTTTCGAAATGGATCTGAGAATCAGTTGATC
AAGCAGCATCCCCTTGGTGTGCACCTGGCTTTGTGCGTCTGACTCCAGCCTCAATGTCCT
CAAGGGGCGAAAAAGAACCTGCTGAAATCCTGCTTGTTCCGAGAGTACCGTTGTGAATTT
GCAGATACACGAATGATCGCTTATGTCCAAA
>MATOU-v1_1300978
AAGGGACCGCCAGGCCTTCAGCTCGCAATGAACAAGCAGCACAAGGACTACTTTGGCGTT
GCCATCACCCCACGCAATGACACCCAGGAGCAGGCTATCATCAACAACAGGAAGGATTTC
GGCTCCGTGACTCCCGAGAATGCCATGAAGTGGGAGGTGACAGAGCCAAACCAGAACGAA
TTCACCTTTGGCGCTGCGGATGAGGTCGTCGAGATTGCGGACTCCAACCATCAGGACGTC
CACTGCCATACCTTGGTATGGCACAGCCAATTGCCGGCTTGGGTCAGTGGTGGCAACTTC
GACAACGAAACCCTGATCGAGGTTATGCGGAACCACATCACGAACGTGGCCGGCCGATAC
AAGAACGCTTGTACCCGCTGGGACGTCGTCAACGAGGCCCTCAACGAGGACGGTACCTAC
CGCGAGTCGGTATTCTACAACACCATCGGCGAGGCCTTTATCCCCATTGCTTTCCAGATC
GCCGCTGAGGTCACCCCGAACAGCAAGCTATACTACAACGACTACAACCTGGAGTACAAC
GGCGCGAAGACCGCTGGTGCCCGCCGCATTGTCGATCTCGTTCAGTCTTACGGCGTCCGC
ATCGATGGTGTTGGCCTCCAGGCCCACCTGACTTCGGAAGGCACTGCGAGCTCCGGCGGT
GGCGTGACTCCCAGCACCGAGACCCTGACAACCGTCCTGGAGGGCTTTACCTCGAAGGGT
GTCGATGTCGCCTACACTGAGCTCGACGTGCGATTCACGCTGCCGGTCACCGACGAGGAT
CTCCAGCAGCAAGCCGATGCCTACGCCCGTGTGACGCAGAGCTGCTTGAACGTCAGGAGG
TGTCGCGAGATCACCGTCTGGGGTGCTGTCGACAAGTACTCCTGGATCCCAGGCGTCTTC
CCTGGTGAGGGTGCTGCGCTGATGTGGAACGACGACTACGAGAAGAAGCCTAACTATTAC
GCCGTGCTGCACAAGCTGCAGCAGAAGCCTAAGCGCTGGTGGCATTAAATCCCACTGGAC
TCCCGTGGAGTAACCTTATGACCTGTAGATAGTCGAAGGTTGAATTGAACATTCTTTACC
ACCAAAA
>MATOU-v1_1300979
ACATGGGGAACCAACTCCCTTCTTCGAGATTAGGTGAAACGACTTTCTGCAACGATGCAT
ATCAAACAAGTGCTTCCTCTTGCACTGGCCGGCCTCGCTGCTGCGGGCGGCAAGGGCAAA
GGTCCCAAGGGGCCGCCAGGCCTTCAGCTCGCAATGAACAAGCAGCACAAGGACTACTTT
GGCGTTGCAATCACGCCACGCAACGACACCCAGGAGCAGGCTATCATCAACAACAGGAAG
GATTTCGGCTCCGTGACTCCTGAGAATGCCATGAAGTGGGAGGTGACAGAGCCAAACCAG
AACGAATTCACCTTTGACGCTGCGGATGAGGTGGTCGAGATTGCGGACTCCAATCATCAG
GACGTCCACTGCCACACCTTGGTATGGCACAGCCAGTTGCCGGCTTGGGTCAGTGGCGGC
AACTTCGACAACGAAACCCTGATCGAGGTTATGCGGAACCACATCACGAACGTGGCCGGC
CGATACAAGAACGCTTGTACCCGCTGGGACGTCGTCAACGAGGCCCTCAACGAGGACGGT
ACCTACCGCGAGTCGGTATTCTACAACACCATCGGCGAGGCCTTTATCCCCATTGCTTTC
CAGATCGCCGCTGAGGTCACCCCGAACAGCAAGCTATACTACAACGACTACAACCTGGAG
TACAACGGCGCGAAGACCGCTGGTGCCCGCCGCATTGTCGATCTCGTTCAGTCTTACGGC
GTCCGCATCGATGGTGTTGGCCTCCAGGCCCACCTGACTTCGGAAGGCACTGCGAGCTCC
GGTGGTGGCGTGACACCCAGCACTGAGACCCTGACGACTGTCCTGAAGGGCTTCACCTCC
AAGGGTGTCGATGTTGCCTACACTGAGCTCGACGTGCGATTCACCCTGCCAGTCACCGAC
GAGGATCTCCAGCAGCAAGCCGATGCCTATGCCCGTGTGACGCAGAGCTGCCTGAACGTC
AGGAGGTGTCGCGAGATCACCGTTTGGGGTGCTGTCGACAAGTACTCTTGGATCCCAGGC
GTCTTCCCAGGTGAGGGCGCTGCACTGATGTGGAATGACGACTACGAGAAGAAGCCTGCC
TACTACGCCGTGCTTAACAAACTGCAGCAGAAGCCTAAGCGTGGGGGGAACTAGTGCTCA
CCGGACTTCTGTGAAGTAACATTGTGACCAGTAGATAGCTGAAGATTGGTTTTGAACCTC
TGAACTCAATCATTCTCTAGTGAGCTTTCGAATGGATCAGAGTATCATTCGCC
>MATOU-v1_1301230
CCTCTGATTACTCAAAACACGGGAGTCACACATGTCATAGTGGCCGCAATACATCTAAAC
GAGGGCCCCGGAAACATCACGCTGAATGACCATCATCCCGACCATGAAAGGTTCGCAACC
TTATGGGGTGAAGTTGCATGGCTACAGGCCAGCGGCGTGAAAGTGCTGGGCATGCTGGGC
GGAGCCGCCCAGGGCAGCTTTGCAAGACTGGATGGGGAAGATACAGCTCGTTTTGAAGCG
TACTACGCACCATTGAGTAATATGCTGCGCAAGCATAGACTCGACGGCGTTGATCTAGAT
ATCGAGGAGCCTACGACCATCCCCGGAATCGTTCGGCTTATTGATCGCCTACGGGCAGAT
TTCGGGTCTGCTTTCCTCATTACACTTGCACCGGTGGCAACTGGTCTGCTCGTAAATACG
CCGCACCTTTCCGGCCCAGCCTTCAATTACCATATGTTAGAGGCGATGAGGGGACACCAA
ATTGCATGGTATAACGCCCAATTCTACAATGGCTGGGGCGACTTGAGTAACCCTTTCTGG
TACGAGACGATTGTTCGCATTGGGTGGAAGCCAGAGAAAATTGTCATTGGCTTGCTCACA
AACCCTGCCAATGGAGGCTCGGGTTATGTTCAACAGCAGCACGTGGAAGCAGTTTTGCAC
AGCTTGCGCCAGAAACATCCAGATTTAGGTGGCGTCATGGGCTGGGAATACTTTAATGCA
CTGCCTGGTGAACAAGCTAGACCATGGGAATGGGCAGCGAGAATGTCTCGATGTCTGAAC
GCTCCGCTACAATCTGCCCCAACAGCAGCGCAACAAACGCCAGTCCGACCATTCGGACAA
GAAGCTCTTTCCGCGCCTCCGCATCCGTACCCAGCAGAAAGCGTCAAAACGCTACAAGAT
CTCGGATTTAGTCAGCAACAAGCCATCGCTGCTTTGAATTCCACCAGTGGGAATGTAGAG
TATGCTGCTGGACTCTTGTTTCAAGACTAAGCTCCCTCATACAAAAGACAAGCCAACCCT
CACCCATTTCTACCGAGTGGGCCTTTTGAGCCGCGTACCACTGCCCAGAGCGCGCTTTGG
TAGAAGTGTTGACA
>MATOU-v1_1301255
ACATCATCTTGAAGAGTAGGTTGATTCACATCTCTCTCTCACTTCTTCCTATTGCAGTTC
TGCTTCGCGTACTCGCTTGCTTGTTTGCTCCCCTCCTGCCGTCCCAACCATGGACGCACT
CAACGAAAAGGCGCCCGACTCTCTCAAGGCAGATGCACCAGGTCAGGTCCCAAACGATGG
CACGGGCGTGCTTGCCCTCGATTCGTACCTTGAACCCTTCAAAGGCGCCCTCCAATCCCG
CTTCACCAAAGCCCAGAAATGGATCAACGACATCAACACCCACGAGGGCGGCCTGGAGAA
GTTCAGTAGAGGCTATGAGCGCTTTGGCTTCACTGTCGCCCCCGATCATACCATCACCTA
CCGCGAATGGGCCCCCAACGCCCTGCGCGCCTACCTCATCGGCGACTTCAACGGCTGGAA
CCGAGACAGTCATGAGATGAAGCGGGATCCCTACGGCGTCTGGGAGATCAGCCTGCCGCC
CGTCAATGGCCAGCCCGCCATCCCACACGACAGCAAGGTGAAGATCAGCATGGTGGTGCC
CAATGACCACGCCCGGGCCGAGAGGATACCAGCGTGGATCAAGCGCGTCACCCAGGATCT
GAATGTCAGTCCCGTATACGACGCCCGCTTCTGGAATCCGCCGCAGCAGTATACATTCAA
GAATCCACGCCCACCGAAACCCCAGAGTGCACGCGTATATGAGGCACACGTCGGCATCTC
CTCCCCTGATCCCAAAGTGGCTACATACAAGGAGTTCACCCACAACACTCTCCCACGCAT
CCACAAGTTGGGCTACAACACCATCCAGCTCATGGCTGTCATGGAACACGCCTACTACGC
CTCCTTTGGCTACCAGATCAACTCTTTCTTCGCCGCCTCCTCACGCTACGGCTTTCCTGA
CGACCTGAAAGAGCTCATTGACACTGCTCACGGCATGGGCATTACCGTGCTGCTCGACGT
CGTCCATTCTCACGCCTCGAAGAATGTGCTCGACGGTCTCAACATGTTCGACAACTCCGA
CGGCCTCTACTTCCACGCCGGCGCCAAGGGTCGACATGAACTGTGGGACAGCCGTCTCTT
CAACTACGGCCACCACGAGGTCCTCCGTTTCCTCCTGTCCAACCTCCGCTTCTGGATGGA
GGAATATCGGTTCGATGGCTTCCGCTTTGACGGTGTCACCAGCATGCTTTACAACCATCA
CGGTATCGGCACTGGCTTCTCAGGTGGTTACCACGAGTACTTCGGTCCTAATGTCGACGA
AGACGGCGTGGTTTACCTCATGCTTGCCAACGAGATGCTTCACACCCTCTTCCCATCCTG
CATCACCATCGCTGAAGATGTCAGCGGTATGCCGGCCCTCTGCATCAAGCTGAGTCTAGG
CGGAATAGGATTCGACTACCGACTCGCCATGGCCGTACCAGACCTCTACATCAAATGGCT
GAAAGAGAAGCAAGACATTGACTGGGACATGGGCAACCTCTGCTTCACCCTGACCAACCG
TCGCCACGGCGAGAAAACAATCGCCTACGCCGAATCCCACGACCAAGCCCTGGTCGGCGA
CAAAACCCTCCTCTTCTGGCTCTGCGACGCCCAGATGTACACGCACATGTCGACCCTTTC
CGAATTCACTCCCGTCATCGAACGCGGCATGGCACTGCACAAGATGATCCGACTGATCAC
GCACGGCCTCGGCGGCGAAGCCTACCTGAACTTCGAAGGCAACGAGTTCGGACACCCGGA
ATGGCTGGACTTCCCACGCGAAGGCAACGGGAACTCCTTCCACTACGCCCGTCGCCAATT
CAACCTCGTCGACGACCCCCTCCTGCGCTACCGCTTCCTCAACGACTTCGACGCCGCCAT
GCAGCACGCCGAGGAGAAGTACGGCTGGCTGCACTCCCCGCAGGCCTACATCTCGCTCAA
GCACGAGGGGGACAAAGTCATCGTCTTCGAGCGGGCGGGCTTACTCTGGATCTTCAATTT
CCACCCCTCGAGCTCCTTCACCGATTACCGCGTCGGGGTCCAACAGGCGGGCACGTATCG
CATCGTGTTGAACACGGATTCCCCCCGTTTTGGCGGATTGGGACGCGTGGATGATGGGGA
GAAGAGTCGGTTTTTCACGACCGATTTCGAGTGGAATGGGAGGAGGAATTTCTTGCAGGT
TTATGTGCCGACTAGGACTGCTATGGTCCTCGCGCTAGAAGAGACGCTCGATCCGAATTG
GAAGTCGCAGATTCAGCTTGGGTATTAGAGGTTTTCTGATGAGAGATGCATGGGAGGAGT
AGGGAGAGAGAGTGAAATAGCATTGAGAAGGCGAGGTTTCTGGTGATAAGGTGGGGTTGG
GGCAAGAGGAGTTGGTAAGGGGTGGAGAAGAAAGCGAGGACTTCTCACCACTTTCCTCCC
CTTCTTCTTGCCTGCAGTGTTACTTACTCCCAAGCGACAAGGAGTTCCATACATGCTGGG
ATCGAGATGTCTATATTTAATCGTACCTGGATGGGCTTTCCTTCTTCTAGGGAGGAGGAG
GAGAAAGGGGTTAAAAGAACTACATCTTACCACCCCTCCTTTCCCCTTCCCTGCTTATAA
ACAT
>MATOU-v1_1301743
ATCGTGGAGGACACTACTTGGTTGCCCGCTCGCTATGGAGCACAAGTGTGGAATTGGATC
GCAAGCGCCTTTACAACAGCCACACTGGCACCCCAGGCAGCCTACCGTCAACGTGAAACG
GCCCTCATAGCAGTAGCCGGTACTGGACCGACGAGGAGAATGCCGGAGAAGCCACTGACG
GTAGCGACGTATGCTGCTGGAGCGTCTCTGGCAGCCATCACCTTGGTCTACGTGTTTGGA
CCTACGTACTTCCTTGATGACGACGCAGCCAACAGCTCCAAATCGAGCCGAAAGAAGGGT
GTCGTTGGACTGGTCAACCCCGCCAACGATTGCTTCCTCAATTCGGTATTGCAGGCTCTA
GCAGGCCTTCCCGAGTTGAGGCTGTATCTCATCAAGGAGACACATACGCGTAAATTGGAT
GGCGCAGAGCTATACAGAGACCTTGGTGCCGCCCTAGAAGAACAAAAGAAAGAAGGTGTC
GGTAAACAGGAACCCGAATGGAAGCTGCTGGGCCTGCAGCAAGGTCGCATTACGGCTAGC
TTGAAGCAGATACTGGATGCCTTGAACGAGAGGCCAATCTACAAGAAGACGATCAGTGCA
CAACAATTCGTTCGAGCTGTAGAGGAGACGTTCCGAACAAGGATCAACAGAACGCAGCAA
GATGCGCAGGAGTTCCTGCAGGTGGTCGCTGAAAGGCTGGCAGATGAGCACACTGCAGCG
CTGAGAGTGCGAAGACAGGCGAAGCGTACACAGCTGAATGCCGAAGCTGCCAAAGCAGGT
CTCTCGGGAAGTAGCACCCCTGAGGTGCTTGCATCCGAAGAAGTGAGGCCCAAAGACAGC
AAACTTGACCTGCCGCAGCATGAAATTACGTCGCCCGAAGTGTTGTCGTCTATTGAACAG
CAACCTGATGCCGCTCTCTTTCCATTGGAAGGCAAGCTGGAATCGCAAGTGGAATGTTCG
CATTGTCGCTTCAAACCCAAGCCATCGGTGTCGTCCTTCGTCAGCTTGACCCTGCATGTA
CCGCACCTGTCGAATTCAACAACACTGAACGCTTGCTTCGATGGCCTTTTGAAGGTCGAG
CGCATCGATGACTTCATCTGCGAGAAGTGTCGGCTCGAACACGCCGTGACTTCCAACGAA
CGTCAGCTGGCGAAGTCCAATATTACCCAGGAGCAGCGAGCGGCACTCGAAGCTGACTGT
GCAAAACTGCGAGCGGCCCTTGAAGAAGACCCGGAGAGGCCGCCAGAGGGCGTGACATTA
CCTGACACTTCTCTAGCGCCCAAACGGCAAATCACCAGGCACACCAGGATCTCATCTTTC
CCGCGAGTTTTAGCCGTACATCTCAGTCGGTCGGTCTGGGACCCACATTCAAGCTCGTCG
AAGAACATGGCGAAAGTTTCGTTCCCGGAGACCCTACCACTTGGAGGTCTTCTTAACAGG
AAGACTTATCAGTTGCGAAGCGTCGTCACGCACAAGGGTGGCCATAACAGCGGTCATTAC
GAAACTTTCAGGAGACAGTTTCTGAATCCTCCCATCTCGACACCAACGACGATGGGCACA
GAAGGGCTTTACAGCGGACGCGGTACACCGATATCCAGCCCGGGCGTGTCAGCCGCACCA
AGCCCGCGCCTAAAACCCAAGTTTTCACGGGACGTCCTGGGCGACAGTCAGTCTTCGAAT
GGCGGGCTTTCACCGCTTTCTGAAGATCCATCTTCAAGCTCTTCTGCATCTACCCGATCG
GGACAAATGTCCCTGCCTGAGAAGAGAAAGCCAGCACCCACAAGTGTGCCTTTGGATGCC
ATACCCACTCCAGGTCTCCCTCCTCTGCCGGCTGAGAGGGAGTCGTCTGACGAACCAAGG
CGCCAATCTAGCGTTGCGCGGGCGATGAACCACCTTCCAATCCGTAAGCGCAAGCCGCAC
GATCGCTGGTGGCGTATCAGCGATGACAAGGTCAAGGAATGCAAGACTAGCGACGTGCTT
GGCTCGCAGAGAGAAGTTTATCTCCTTTTCTATGAGATCTTGGACGACCCATCAGCATGA
TGACTGGCGATTCGTTTTGTGTCATTAGCGAGGCGTTTGGGTTTTAGGTCATTTGTTCTT
GCACTGTACATAGGGGCTATGCAGCGAAACGTGTGTCAAAACGTTGAAATCTGATTAACA
TCTGTTATGACCGTGTTACTTCCTCTCATCTATTTCTATCTAAGCAGATGATGA
>MATOU-v1_1302070
GGCATGCGAGGGCATGACTCGGTGTACAGCAGATGATTTTGTTCCCGTCCGATACACGCC
AGGGAGAAGGAGAAAACCGGAGaaaaaaaGGAAGGAGGCTACTCACACCTCGCTCGCCTC
ATCTTCTACCGCTGCAGCAGCCTGTCCTTCCTTGGCTTTGCCCGCACCTTCTTTGCCTGC
CTTCTCCTTTGCGGCCGCTTCCGCCTTCTCGCCCTTCAATGCCTCCTCCAACATAGCCTT
ATCCTTCTCCCACTGGCCCTTACCCTCCGTCATATCGAATTGCTGCTTGATCctctcttc
tctctccctcttctcgccctcttctttctcccgcgcttgcctttcctgctccatctcctc
cATGTGCCGGATATCGTCCACGCTGGGCTCGTACATATGCCAGATGGTGTAGTGTGGGAG
ACCGATGACGCTGTACTTCATGCGCTTGGCCATCTTGCCAAACCCTTCCGTCTCAGCGTG
CTTCTCGAAGGAAAACGCGGGAAAGTGCACGCCGGCTCGGAATACGCGGGCTTTTGCTAG
GATGGAGACACCGCCTACGCCGTCGATCTCCATTTCCATGTCTGGGTCGCCATAGGGATC
ACGGAGGTAAGCCAGATGTGGACGCCAGGTGGCGTACTCGGCGTAGCCTTCTACGATGAC
TGCGTCTTCGTCCAGAGTGTCGGCCAGGGCGAGCGCGGTTTCGGACTCCTGCCAGGAGTT
CAAGTCGTAAGGTTGCTCACCACCTAGCCAGTCAGGCAGCGGACGCCAAACATTGGGTAC
GATGACATCTTTATTATGTCTCATCAGGTCTTCCAGGATGGTGAACGGTGCCGTCTCGAC
ATCGACGTCGCGCCAGTAGACCCATGAGTGCGTAGGCCGGAGAGCAGCAGACAGCAGCCA
GTTTCGAGCTTGCGCCATGCTCTTTCGGCGGGAGGCTTGTGCAGCGAATCCATGGCGAGA
CTCGACATCCTGGTTGACCTTCTGTCCGAAATCCTTCTCTATCACTGAAATCTCACCAAA
TGCCTCCCGAGGGTTCTCGTGCGTCTGCAGATCCGAGAGCAAGTCACTCAGCAAAGGTAG
AGTGTTGTCCTTGCTGTCTCCCACCAGGAATGCCAAGTCGATCAGGTGGTGCGGGTATGT
CAGGTTCCGCAGATGGCTGAAGAAGAGCGGCAAGTGGGCGGCGGCGTCACGGAGCGGGGC
GCAGAGGAGGATACGTTCCTCGCGCTCCCAGCCGCGGGATGTGCCGCCGACATTGGAAAG
GTCGTAGTAGCGGACGGTCTCGATCTGCCACTCTTCGCCCTGTGGGAAGAGGGAGAGGGT
CAGGCCGGCGGGCAGTAGTGCGGTCGGACGGAGGGATGGGAAGACGAAGCCCAGGATGAG
GAGAAGAAGCGTGAGAGCGCCGCCGACTCGAAGGAATAGGCCTCGGTTTCGCTGGAAAGT
GGAGCGGGAGGAGCGAGGTTGATATTTTTCATACTTGTCCGGCTTGATATTGAATGACCG
CCCTCTGCTTTCTACGAATGTCGGGCTCATGGGATATCCCCCTCCTCCGCCATTGGTATA
CACGTGTCGCGAACTCATCTTGTCGCGGTCCGCCGCATGAAGCGGGAGCATTCACCAGTT
GGCCCCCAGGCCGGACGTGACGTGGTCAAAAACCTTCGTATCGAGTGTCGCTGCAGTATA
CTGCAATCTCCAATGCGTCTCGTCTGGTCGTACCCGTCGCAGGCTCGAATAATGAAAGGC
GATGTTCTGGTGGGACCGAAGCTCGTGTCACTGCCTCCCAGCCAGCTTCCAGATTCCTTT
CCGCCCCCGTAACGCTATTACTATATCCCACTTCAATGCACCAGGCTCCTTTACTCCCAA
TTCGAATATGCTGTCAACATGAGTGCAAGGACGCACTGTGATGAT
>MATOU-v1_1302149
CTTAGAACCTGCTTGCTCTTCCCCGCTACAATCCACTCCAGTACATGGTCTCCGAAAGCG
TAATACTGCCACGCAGCGGGGTATCCTGGCTCGAAGTACCAACAAGAACATCGTACGCTC
CCTTTTCACACGTCCATTCCTTCCGCTGCTCGGACCAGAAGCTGGTCGAGTATTTCTTCG
ACATCGAGACCTGCACTTGCCGAGACTCTCCCGCCTTGAGGAAGCACTTGGTGAAGCCTT
TCAGCTCCTTGACCGGTCTCCTTATGCTGGGAGAAACCGGAGCGACATAGACCTGCACAA
CTTCGGCTCCATCTTTGCTACCGGTGTTTGTGACTGTGAGAGTGGTCTTGATGGTATTGG
CATCAGCTGAGACATTGAGTTTATCCAGCTTGAAGGTGGTGTAGCTTAGCCCGTGACCGA
ACGGGAACGCGACTTGCTTCTTGAGCTTTTCGTAGAAGCGATACCCAACGTAGACATCTT
CGCCGTACCAGACTCTGTTCTCGTCTGATGAGAAGTTCAAGTATGCCGGGTTGTCCTCGT
TGCGGATTGGGAAGCTAAGTGATAGCTTGCCGCTCGGGTTCGTCTTGCCAAATACCACAT
CTGCTATTGCATGTCCAGTCTCGTTACCGCCATACCATGCTTGCAAGAGAGCTGAAACTT
CTGTTGCCCACGGCATGGTCACTGGAGTACCAGATTGGTTGACGACAACGGTATTAGGAT
TCGCGGCGAGGATTGCGTGGACGAGGTCATCAGTGCCCGGTGGCAGGTCCATATGTGCTC
TGTCGTAGCCTTCGGACTCCCAGTCGCCATTGAGACCAATGCAAAGCACGACCTGATCAT
TTGCCTTGGCGCACTCTACGGCTCTTCGACGTTCATCGACCATGTCAACCTTGCGGTAGC
AACCCAGGCGGACACCGCCGGCCCCGAAGCCTGTCGTTCCTTCTTTCACTAGTCTTTGAG
TCGGCAGGGTTCCAAATTCGACGTGGACAGAGTGTTTCTCGCCTGCCGTCAGGCGACAAC
TGGAAATCTCTTCGATGGTGCCTGCGCCGAAGAAGCTATCGCCGGGAGTCTGCTTCGTGT
CATTGTCTACCACAAGCTTGCCGTCGACAAAGATTTTCGCAATGCCAGCCACAGAGCAGC
TGAACTCATAGTCAGCGGTCTCATCCGGCACAATAAAGCAATCAACGTCAGCGTAGAAAG
TGTCATCTACAGGCTTCTTTGGGTGCTTGTAGTCAGCCAGTAGTACATTAGAGTCGGTAA
TCCTCATGCTGTCAAAGCTCTTACGACCTGGTGTACTAGGGGGCTCGAGGTAGAGGGTAA
GATCAAGGCCCTGCTCACCGCTCTT
>MATOU-v1_1302227
GAAGATGTCTTTTACGAGCTATGCGATGAGCTCGGCATACTGGTGTGGCAAGATTTCATG
TTCGCGTGCGGTAATTATCCAGCGTATCCTGACATGTTGAAGTCGATTGAGCAAGAGTCT
GTTTGCCAGACGAGGCGCTTACGGCATCATCCTTGCCTTGCTATATTTGCAGGCAACAAT
GAAGATTACCAGGTCCAAGAATCGAGCGGTTTGATCTATGACTACAAGGACAAGGACCCA
CAGAGTTGGCTGAAGACGGATTTTCCGGCACGATATATCTACGAGAAGCTATTACCAGAC
GTGGTCGCCGCTCACTGTCCGCATGTCCCGTACCATCCCGGATCACCATGGGGTGATGGC
AAAATCACCTCCGACCAGACCGTCGGCGACATGCATCAATGGAACGTATGGCACGGCACT
CAAGAGAAATATCAGATTTTCGACCATCTAGGTGGCCGATTCAATAGCGAGTTCGGCATG
GAAGCGTTCCCGCACATCGACACCATCAAACATTTCGTAACGGATCCATCTCAGCTCTAC
CCGCAAAGCCATATAATCGACTTTCACAATAAAGCGGACGGGCATGAACGCAGGATAGCA
ACATATCTTGTTGAGAACTTCCGGACCAGGACGGAGCTTGACAAGTTCATACATCTCACA
CAACTCAGCCAGGCTGAGGCATTGATGTTCGCATATAGAGGCTGGCGACGTCAGTGGGAT
CAGAGGCGGCTCTGCGGAGGTGCCTTGGTCTGGCAGCTCAACGACTGTTGGCCAGTCACT
TCTTGGGCTATCGTCGATTACTTCCAGCGCAAGAAGCCTGCTTACTACGTCATGCGTCGA
GCGCTTGCTCCGGTGGCTATCGCAGTGAGAAGGGAGCATCATGATTGGAGCGTGGTACAT
GCTAGGCCTGCAAAACAGTCGAAGTATGAGTGTTGGGTTGCAAGCAGTAAGCTGAAGGAG
ATTAGTGCATCGGTGGAGCTGCGCTATATCAGCATCGCTACTGGCCAAGACATCAAAGAC
AAAGTGGTTCTCAAGGATGTCCGTATCGTACCCAACGGCACTACGGAGCTGTTCCAAGGT
GTCATTGACAACGAGCGAGAAGAGGCTCACGTTGTCTCAGCTCGTATCTGGATAGATCAG
GAGCTGGTGTCTCGCGACTGCGACTGGCCTCAGCCTTTGAAATATCTTGACTTCAGCGAT
CGGGGTGTGAGCGTGGAGTCCGGCAATAGCACGATGACTGTGAGGGCCAGCAAGCCAACC
AAGGGCCTTGTTTTCGAGGAGCGTGAGGGAGTTCTCGTAACGGACAGTGCGCTGGATGTT
GTGCCCGGTGATGAACAAATCATCAAGGTGAAAGGAATGGATATGGATAGCAAGCATCTC
GACTGGACATTTCTAGGCGCACCATAGTAAACGTCCAAGTACAATTTGAATGTGAACAAT
TTTTCGTCGTTTGGAGAACATGATAAAAACCGAGAGTACATTTTACATTTTCGGCAAAGC
AGTTTTATCTTGCTTGTTCATATCATGCTTAATACATGCCGCTCGCAAACAGATCCAGCG
TACTTTTAGATATCATCCACGCCAGAACACCCCACCAAAGCCTGGTCACATCTTTTTAAG
TCGCTTTCCCGTTCGCACCTCCCCCAACCTGTGGCATGGACTCCTGCTGCTGGACTGCAG
CCTCAAGTTTCTCGACCGCATCTGGCGCAGATGCAGGTGCGCCATTCATCTCCTTTGCTA
ACTGGCTGACACCTGAGCCAGGGACGTCCAGGGACTGCGCGTCAGACTTCTTAGGCTTGA
ACGGCACTGGCGTGCTTGGTCTTGAGCTCAGGAAAGAAGATGCAGCGGACAAGAGAGCAA
AGAGAGACGATTGAACCACGTCTTCGTGGATGCCAACGCCCCACACCTTTTGCGCCTGGC
CAGAAGCCGTGCACTCGATGAAGGTTGCGGCTTGCACGTCACGACCCTTAGCCTCAGCGC
CCTTGCGCTCAATGGCGTGTTCCTTGTAATCCGAGATGTCAAGGTCAATGCCAAGGGTCT
TGAGCGCATTGGCCAAGGCTGAAAGAGCGCCGTTTCCGGTGCCTGAGATACGGTGCTCGG
TGCCATCGATCTCGATGATGCCGTCGAACTTTCGGCGAAGGTTGCGCGAAGAAGCTGTCT
TGCCTTCCTGCGGAGGGGCGGGGGACGCTGATCGGTCGGCTGAGATGTTGTAATCGACCA
AGCTGAATCTTGGGTTGCGGTTCAAGTGGTAGGCATCAACAAAGAGATCCTTGATCTCAT
TGGGCAACAGCTCACGACCGAGCATGTCAGTCTCTCGCTGCACGATCTTGGAGAATGCAA
CCTGGAGACCACGAGGCAGGTCGAGCTCCAACGTGCGTTTGATGATCCAAGCCACACCAC
CTTTGCCGGATTGTGAGTTGACTCTGATGATGGCTTCATAGGTACGGCCGATGTCTTCCG
GATCCAGAGGGAGATAAGGCATAGTCCAAGGATCCTCTTTCGAAAGCCCGGCGGCCTCAC
GTGCAACGAACCCCTTCTTGATGGCGTCCTGGTGCGAGCCAGAGAAGGCGCAAACGACCA
GTTGACCACCGTACGGTTGCCGTGGATGCACCGGGATCTTGTTGCTCTTCTCCACGATGT
CAATGACGGAGTTAAGGTCCGAGAAGTCAATGCCTGGGTGGATGCCTTGTGTGTACAGGT
TGAGACCCAGAGTGACCAAATCAACGTTGCCCGTCCTCTCGCCATTGCCAAACAGCGTAC
CCTCTACTCTGTCGGCACCAGCCATCTG
>MATOU-v1_1302550
ACATGGGGAAACTTGAGTGATGGTTTGGTGGGTCATTATTGATCAAAGACCTTAGAGTAA
CCAACACGCTCTTCACTGAGCTCACTGGAGCTCTGCGATCAACGGCCCGGCTCTCCCATC
TCAGTACTGCGGCTCCTTACCAATTTCCCATACTCAGGAGCCATTGGACGAACGACTTGA
TCTTGCCTGTGCTTCGAACGGGAACACGCACCCAAAGAGTCCGTGAAAAGTGCAATGTCA
CGATAGCTAGCTCCAACATTCCACCATGGCGCCATCGACACCCTCTCACCGCCCGCGCAA
GAAGCGCACTGGAAACGCTTCATCTTCGAACGGGACCACTACCCTAGACGCCACATCCAA
AATGGAAAAACCCTCCTTTCCCCTCACCGCATTCTTCTGGCCTGCAAAGTCCCACCCGTC
GTCCTGGGTCCTGCTCCCGGCCATTCTCATGACTACCTTCCTCTTCCGCTGGACAGTCAG
CATGTGGCCTTACTCAGGCTACGTCAAACCGCCTATGCACGGCGATTTCGAAGCCCAGCG
GCACTGGATGGAACTTACAGTCAACTTGCCCACGACCTATTGGTACTTCCACGACCTTGA
ATGGTGGGGCTTGGACTACCCGCCCCTCACTGCCTACCATTCCTGGATTCTCGGGCAGCT
GGGCTCATGGCTGGATCCGAACTGGTTTGCTCTGTACCTCAGCAGAGGGCTAGACGATGC
TGGACTGAAGGTTTTCATGCGGGCTAGCGTCGTTGTGAGCGAGTATGCCGTCTACGTGCC
CGCTGCTGTGCTTTGTGTAAGACAGCTGGCGAGGTTGCATAACATCAATACGTGGGAGTC
TTCGATCGCGTTGGGCGCTATCCTGATGCAGCCGGCTACTATCCTCATCGACCACGGGCA
TTTCCAGTACAACACCGTCATGCTGGGATTCATGCTCGCGACTATGGCAAGCATGCTGGC
CGGGAAACCAATGTGGAGTTGTGTCTTCTTCGTGGCGACACTGGGCTTCAAGCAGATGGG
CCTCTTCTACGCCCCGGCTGTAGCTGCCTATCTAGCCGGGATATGCATCAGCCCGCGAAT
CAACGTACTGCGCTTCTTGGGCATTGCTGTCGTCACGGTCGCATCTTTCGCCATCCTTTT
CCTGCCGCTAATTGCAGGAACAGCTTTTGACGTGTATCGCGGCGTTGCGCTCCCAACTGA
TGCGAAGTTACCGCCACTTATGTCAGTCCTTCCATGGAACATCACAGAGAGGAGTTGGTA
TTATCCATACCTCGTCCAGCTAATGCAAGCTATCCACCGAATCTTCCCCTTCGCTAGGGG
GCTCTTCGAGGACAAAGTAGCCAACATATGGTGCGCAATACACAGCTCGGGCGTCTACAA
GCTCAATCGATACGACTCCACCTTTCTCAGCCGGGCAGCGCTTGGCCTGACACTCGCTTC
CATCGCCCCGCCTTGCTTCCTGCTATTTCTGAAGCCGAGAAAGGAGGCTCTACCATATGT
GCTGTCAGCAACGGCCTGGGGCTTCTTTCTGTGCTCTTACCAGGTGCACGAGAAAAACGT
GCTGCTGCCTCTGTTGCCGATGACGTTGCTATTGGTCATGCAGGATGGAATGAACGCCGC
GAACCGGGCCTGGATAGGTTACGCCAACGTTCTGGGTTGCTGGACAATGTTTCCGTTGCT
AGTCAGAGACGGGCTACGGATACCGTACTTTGTGCTGACCGGCTTGTGGGCATGGCT
>MATOU-v1_1303829
TGAGTTCAAAAAAGCCTGGGACCAGGACTTCAAGAACGTACCGGACAGGCCCCTTATGAT
CATGGCTATGTACCTCGCCTACTACGGGGACCACTCTGTCCTCCCCGACGATGCCGAGTA
CGTCTCTCAAGCAAACTGGACCGCCTACCCATACTCCCGCGGCTCAATCCACATCACAGG
TCCCACAATGAAAGACCCCGTCGATTTCGACGTCGGCTGGCTCAAAGACACGGGCACCGA
TCCAGGCCAAGCACCCGGCATAGTCGACTTGAAGAAACATGTCTGGGCGTATAAAGCGTC
GCGCGAAATTTGGCGGCGCATGAGCATCTTCCGCGGCGAGCTGGCCTCGTCGCATCCCAA
GTTCCCTGAGGGCTCGAAGGCCGCGGTCGTCGAGAAGGCCGATGGCCCTCTCATTCACGA
TGAGGATTCGCGAATCGAGTACACAGCTGAAGACGACAAAGCGATCGAGGAGAAAGTGCG
TTCGATCATTTCGACGACGTGGCATTCGCTCGGGACGTGTAAGATGATGCCAAGGGAGAA
AAACGGGGTGGTGGACAACAAGCTGAACGTGCATGGGGTGAAAGGACTTAAGCTGGCGGA
TCTGAGTGTTCCGCCGCAGAACGTTGGTGCTAACACTGGCGGCACGGCATTCGTGGTTGG
CGAGAGAGCGGCGGACATATTCATTCGTGAGTTAGGCATTGGCAGCCAGGCGAAGCTGTG
AGTGTCATCGACTCCCGTGTGGAAGATGTAGTCTACAGCTCAATGCTTCTAACCTTCCAG
CTCGAGAACCATAGTGGCTC
>MATOU-v1_1303899
CCGATATTCGTTGTAATACGCCGAACAGAGGAAGGGACAGTGGAAACGAGCTGGCGAGAT
ATACTAATGCTTTTCAGCGGGGACGTTAAATCCATGCACATGCGCTAAAATCTTTGAAAA
CAAGCCACCGGAAATCTCATGCAATCGCATCCAATTAGACATTCAATGTGAGCCCAAATT
TTCCAATCCGTCGCTATGCATCCAAGATGTTGAGTGATTAAAAGCGATCAACGGTAGCGT
TTCGAATAATCTAGCAGCCGTAAAGGTCGTAGATGGCGTTGCCATTGCTGTCGAAGATGC
CGAAAGATGGCGAGGCGTTGTAGTCCTGGTAAGAGTACCAGAACATGTGAATGCTCTCGA
AAGCAGAGCAGGCAACGCTTCTCCAGTACTTCTGGGCGTTCTGGACCGAGGGAACACCGG
CGCCGTAGTTGTCGCCGCTCACGGGCCATCCAGTCTCAGTCACCCACACCCACTTGCCTG
GGCTGACCTCGTTGACCTGGTTACGTGTAGCGGTGACAGAGTCCCAGAAGACGTTGTAAG
CATCCTCAATGCTGGCGGACTGGAAGTATGGGTAGCCGTCAAGACCGATGAAGTCACAGG
CAGTGATGACAGCCTTGTTCGCGTCGTCGACCCATGCGGTCCAAGTGTCGACGTGTCCGA
CCTCTTGGTTCACACCCATTGCCCTGACCATGCCACGGACGTCGTAGATTTGCTGTGCAA
GCGTGTTGGCGTCTGTGTCGCCCCTGTAGAGGTCCTCAGATCCGACAGAGATGGCAATGA
TCCAGTCACTTCCGTGCTGGTTGATGGCAGCCTCCAAAGCATCCTTCTCCCGTTGGTAAT
GAGCGTTGTCCTCAGTCCATACTCCGACAAGAATCTGAGTACCAGTGTTCAGGGCAGCGG
GAACAGCATTGGCGAGGGTGTTGCAGTCCGAGCTGGCATACAGGCGGACGGAGGTGATGT
ATTGGGGAAGGCCCTTCAGCTTGTTGAAGGCATATTCCCAGTCGCCCTGAGACTTGCAAG
AGCCGTCCTCGTTGTTTGCTCCGACGTTGAAACCCTTCCAGTAGGCGTTGGCAGTGCTGA
AAGTGGCGGCAAGAGCCGTGAGGGTGGTCGAAAGACGCATGATTATGAGAAGTGCGGTAG
GAGCTCTTCAACAAATTCGATTAAAGGAAGATACTGTCCCCATGT
>MATOU-v1_1304102
ACATGGGGGTCACTGCTCTGAGCGAATTATTGGCCTTGTTCCGTTGATCTCTTACTTGCG
ACCTGTGAGCTTCTGATGGTAATGAAGCAGCGATAGCGATAAGGAGTACACCTAAACACA
GCTCGCCTATCAACGATTCTCCCCTCCGCTAGTCGCGAAACCAAACGACCGCCTACCCTG
GGAACGAGGCTTAGCACGTATAGAAGACGAAACGGTCGCCTAGATTATCCTACATCATGC
GGCGCGCCGTGCTCCTCTTCCTCATCTTCAACCTCGCCGTGATCGCCTTCCTGGTCCACA
GCGTCTGGACCTTACTCTCGCTGCTCGTGGTGACCGGCAGCGAAGATGCCATCTCGAAAG
CCGAACTGCCTGCGCCAGGCTCGACAATGATCGACACACGGCCACAATTGATCCCCAAGA
TCATTCACCAGACGTACAAGAATGCCACGATCCCGCCGGTCTGGCAAGAGGCGCAGCAGA
GCTGTAAAGCCCTACACAGCGAAGAAGATGGATGGGAGTACAAGCTTTGGACAGACGAGA
TGAGCGCGGACTTCATTAAGAAAGAGTATCCATGGTTCTACGATACTTTCATCAACTACC
CCTACCCGATCCAGCGGGCGGATTCAATCCGGTACTTTGTCCTGTCGCACTTTGGCGGCA
TCTACATCGACCTGGACGATGGCTGTAACCGCGCACTCGAGCCTTTGCTCAGCTATCCGG
CTTTCGTACGGCGCACGGTTCCCACGGGCATCAGCAACGATGTCATGGGCAGCGTGCCGC
GGCATCTTTTCTTCATGCGCGTTATCGAGCAGATTGCCGACTACGACCGCAACTGGATCC
TCCCGTACATTACTGTCATGGGGAGTACCGGCCCGCTCTTCCTGAGTGTCATGTGGAGGC
ACTGGACAAATGACGGGCTGAATGTAGGCGACGATTCGGACGGTGGAAGGATCAGGATCA
TCTTCCCTGACGAGTACAACGGACACACATGGAGTTTCTTCACGCACCATCTGGGGAACA
GCTGGCACGGCGCAGATGTGCAGTTGATTTTCTGGGTAAGTAATTCTGAATTCCGGGTTT
CTCCTACAAAGGCATCTCGTACTAACTTCTGCCTAGCTTGCTCGCAACTGGATCTTCGTG
ACGGTCCTCGGCTTCGTTCTCGGCATCACAGTCCTGTTGCTAGGCTGGTGGGTATACCGT
CGCTACTTTGTGCGCGCACAAGCTGGGGACATGTCCCCACGATGGAAAGCCGCTGGCCCG
CTTAAGCAGCGGTTGCCGTTCTGGAAGAGATTCACTGGAGGGCGCGACCAAAATTATGAG
CTCGTGGACAGACACGAAGTGTGACGCGGTCGCACTAGTGCTCAGCCATACCGCTAGGCT
TGAGCATGGATATGCATTTGAATTATGCTGCGTTCGAGCGTAGGCGCTGGGAGGGAAGTG
ATGCCGGTATGCATGGCTTGGCCTTATCTACCTTACAATTTCTATGTACATTGTAGTTAC
ATGGCACCTTTGAATATGGTTAAAAGACTTTTGATCTC
>MATOU-v1_1304103
ACATGGGGGTCACTGCTCTGAGCGAATTATTGGCCTTGTTCCGTTGATCTCTTACTTGCG
ACCTGTGAGCTTCTGATGGTAATGAAGCAGCGATAGCGATAAGGAGTACACCTAAACACA
GCTCGCCTATCAACGATTCTCCCCTCCGCTAGTCGCGAAACCAAACGACCGCCTACCCTG
GGAACGAGGCTTAGCACGTATAGAAGACGAAACGGTCGCCTAGATTATCCTACATCATGC
GGCGCGCCGTGCTCCTCTTCCTCATCTTCAACCTCGCCGTGATCGCCTTCCTGGTCCACA
GCGTCTGGACCTTACTCTCGCTGCTCGTGGTGACCGGCAGCGAAGATGCCATCTCGAAAG
CCGAACTGCCTGCGCCAGGCTCGACAATGATCGACACACGGCCACAATTGATCCCCAAGA
TCATTCACCAGACGTACAAGAATGCCACGATCCCGCCGGTCTGGCAAGAGGCGCAGCAGA
GCTGTAAAGCCCTACACAGCGAAGAAGATGGATGGGAGTACAAGCTTTGGACAGACGAGA
TGAGCGCGGACTTCATTAAGAAAGAGTATCCATGGTTCTACGATACTTTCATCAACTACC
CCTACCCGATCCAGCGGGCGGATTCAATCCGGTACTTTGTCCTGTCGCACTTTGGCGGCA
TCTACATCGACCTGGACGATGGCTGTAACCGCGCACTCGAGCCTTTGCTCAGCTATCCGG
CTTTCGTACGGCGCACGGTTCCCACGGGCATCAGCAACGATGTCATGGGCAGCGTGCCGC
GGCATCTTTTCTTCATGCGCGTTATCGAGCAGATTGCCGACTACGACCGCAACTGGATCC
TCCCGTACATTACTGTCATGGGGAGTACCGGCCCGCTCTTCCTGAGTGTCATGTGGAGGC
ACTGGACAAATGACGGGCTGAATGTAGGTGACGATTCGGACGGTGGAAGGATCAGGATCA
TCTTCCCTGACGAGTACAACGGGCACACATGGAGTTTCTTCACGCACCATCTGGGGAACA
GCTGGCACGGCGCAGATGTGCAGTTGATTTTCTGGCTTGCTCGCAACTGGATCTTCGTGA
CGGTCCTCGGCTTCGTTCTCGGCATCACAGTCCTGTTGCTAGGCTGGTGGGTATACCGTC
GCTACTTTGTGCGCGCACAAGCTGGGGACATGTCCCCACGATGGAAAGCCGCTGGCCCGC
TTAAGCAGCGGTTGCCGTTCTGGAAGAGATTCACTGGAGGGCGCGACCAAAATTATGAGC
TCGTGGACAGACACGAAGTGTGACGCGGTCGCACTAGTGCTCAGCCATACCGCTAGGCTT
GAGCATGGATATGCATTTGAATTATGCTGCGTTCGAGCGTAGGCGCTGGGAGGGAAGTGA
TGCCGGTATGCATGGCTTGGCCTTATCTACCTTACAATTTCTATGTACATTGTAGTTACA
TGGCACCTTTGAATATGGTTAAAAGACTTTTGATCTC
>MATOU-v1_1304952
TGTGTTAAtttttttttctctttctcttttttctcttcccttcatggccccctccttctt
tcGTACTAAGAAAGCATTCTTTCCTCTCAAAACACTATTAAGCTAGCCGCCATCTATTCA
TCCGCAATATCCGCCGCAGTGATATTCCCACACATTGGCGTCTTCAACTGCCTTCCAAAC
TTATCCGCCGCCCAGATCAACACGCCATTGGACCATCCGAAACCCTCTACCACCTCGTAC
TCGCCGCCGCCCCCGGCCGCGTTGATCGAAGTCTGGTTGTACTTTTCGAAGATCGTGCCG
ACGTCCTCCGGGTCAGCCCCCTGGAGCTGGGGCATTTGAGGAGTCGATCCTCCCGTGCTT
CGCCACGTGCAGAATGCCGAGGTGACGTAGCGCTGGGCTAGTTCGACCGCGAGATTTTGG
ATGGATCGGTACGACGGGTCGTCCGTCCCGAACGTGGCGGGCGTGTTGAGGTACGACGGA
TCGTCCGTCCCGAAGGTGGCGGGCGTGTTGAGGAGGCCCTGGATGAGGATGTATTGTAAG
GGCGGCCAGACGTTAGGCTCGTCCCACTGTTCGCCGGTGACAAGGTTAGTAGCAGGGATC
GCTCCCGGAGCGACTTCAAGTTGGGCTGCGACGCGGTCATAGGCGCGCGAGACGGCATAG
GGGTTGTTTTTCAGCCAGGTCGGCGCCGCGCCGGTCCAGAAGGGGTAGTATTGCGCTGGT
GAGAAGAGGACTTGTTGGCCTGCGGGAGCATCATCGATTTGGGAACTGGTGGCGTCCGAG
TCGAGCGGCTCGTAGATGTGGCGGGAGTTGGAGGTTAGGTTCCAGTCGAAGTAGGCGAAT
TGTTCTTCATCCCACATCAGGGCTGCCATGGCTTCGCTGCGGTTGGCGGCTCGTTGTTGG
TATTCTTCAACCATTGATTCGCTGTCGTCGCCGCCGACCGTCTCGTAGAAATTGGCCAGT
GTGATTTCGTTGGCGTAGAGGATCGAGTTCAAGTCTACTGGTACGATGTTCTTGGTGTTT
AGGCTGCGCAGCGGGAAGTAGTTATCGTTGGCTGCATCGCTCGGGTTCTTCAGCCAGCGG
CTGCTGTAGTCCCAACCGCTCTCAGCGCCGCTGGCTAGGTTGGCATAAAGCTCTGCCTGC
TCCGTTTCATTCAGATCTTGACCAGGATAGATGATCCCGGACGTTGGAGCGTAGTAAGAC
TCATTCGTCGCAGTGACATAATCCTCGCGGAAGCTCTCCGGGCGCGGTTGGTTGTTGAGA
ACAGCGTAGTGGTTGAGTGTGTAGGTCTTATTCATTCCATCACGGACGCTGACTGTGCGA
TTCTCCATCCAGAACATGTACTCCTTCTCAAGCGTCGGTAGGGCACGCTCTAGGATAGAA
GTATCGTTGGTATATTCTACGTATGCCCGAACCATCTGCGAGAGCAGCGGTGGCTGGCTT
CGGTTCAGGTAGTATTGTCTCGCTCC
>MATOU-v1_1305196
ACCTTCCTAGGACGACAGCAGATTAAGAGATCGGCAGAACATCTTGCACATCTTCGTGCA
GCTTTTGCATTTCAGTACCGAAGATGAGCGGTCACAAAACCACATATCTCAATCTCGTTC
GAGACACCGACAACTTTCCTTTAGATCCTGTGGCAAAGGACTCATACTATGAGCTTTACC
TGCCGTACGACCACACGCCTCATGGCTACCTTCTTGAGGAAACGGTGGACAAGATGCCGT
GGACGAATGTGGACGAATCGCTTTACTGTCCAGCACGAGCATCCTCGCCGCGTGATCGTA
CACGACACTTCCGAAGGCAAGGATACCTCGAAAGCAGTCAATGAAGCCTTTGCAGAAGTC
ATCAATGACTGTGTGGATCGGAAACTTTTCCATCTCCTCGACGGCAAGCACAGCGAACCT
TTCGCCATCCTCGGTGCAAACTACCCTGCCTATCTAGAGCGCTTCGCGGCTGCTCTGTTC
GGTACGATGCAGTGTGGCGCCAGTATGGTATGCTATACCAATACATCCGAGGGCATGAAG
CTATGGATCCCACGCCGGGCTGCACACCTCTACACTGGCGCCAACATGCTTGACACGACT
GTAGCTGGAGGCGTCAAGGCCGGAGCAGCGCCTCTGGAGACATTGATTCGAGAGGCAGAT
GAAGAAGCCTCACTACCTGAGGACCTTGTCCGTCGGCTCGTTCGGGCCAGAGGCGTGCTT
ACATGCATGCAAACGACGGGTCCTGAATTCAAAGGTGAGAAGGGTCTGGTCTTACCAGAT
GTCAATTATGTGTACGATATGGAGTTGCCAGAGGGCGTTACGCCGAAACCGCATGATGAG
GAGGTGAAGGATTACTACTGTATGAGCGTACCAGACGTGCAGGCTGCACTGCTTAATAGG
GAATTCAAGGAGGGTCCAGCTCTGGTCGTCATTGACTTCCTGATGAGACACAACATCATC
ACCCCTGAAACAGAGCCAGACTACGTTGATATTAGCATGCATCTACACCGACGGCTCCCG
TTCCGCATTGCGCCAAGTAAAGGTCGATAGGCGACGCGTTACAGAGCACATTGAGTGCCG
TTCATAACACAAAATGGCATTTGGATAGCATCCGCATGCACACCCCTCGCCACCAATCGC
TCTCTCATCTCACTCAACCTCGGTGCAGCTGTGATCTGACTTCTGTTCTGCCCGCTAGCA
TCCTTGGCGCCACTCCATAGGACTTCTGCGGCCGCACACGCTCTCGGCCAGACCATGTAT
TCGAGGTTCACAGCATCAGTTTGCTCGGACCAGATATGCGTTTCACCGCCGAGAACCAAG
TGCGTGGCATTCTCTGGGATGCCGTTCAGAGGATCGTAGCTGTACATCAGCCTCCAGTTC
TTGAATGGGTCACAGTAATCAAGGTAAGGCCAGTACTGTTGCGAGCTCTCGCCCTGGTAG
AAGTTCAACCACTGGCCTTTGCCACAGTCCAGATACCAGTAATTGTAATTCCCTGCCAAG
CCCCTGTAGCCTTTCGACACAATCTCAGCAAGTGCCTCATCGCTTTGCCATGACTGCACG
ATCGTGTTTTCCGGCAAAGTCAAATTCCAGTCCAGCAACATCTCTTCCCAGACAAGTGGA
GTGAAGCCTGCAGACTCAATCTGATCCATGTTGCGATCCATATACTTCTGCATCAACGGC
TGTAGGACTGATGACAAGTTGCTCTCGACAGTATTGTCCAGATTATATGCGTTCATATTG
ACCTCATCGCCTCCCAAGTGGAAGTAGCTTGTCAATGGTTTCAGCCTCGGCAACAAATCG
TCAAACAGCTTCTCCAGAAAATCGTACACGGCCGTCGAATTGAGCTTCAATGTTCCTGAT
GGCGGCTCAGCGGCGTAGGTGTTCCAGTCGGGCTGAACATTGAACGCAGCAATCAGATCG
GGGTGCGAGAAGGCGATGGAGGAGGTATGGCCGGGATTATCAATCTCCATCACCACCTCG
ACACCGACAAGGGCGCCATACTCCTGCAGTGCCTTTACGTCTTCTGCAGAATATTTCTGA
AAAGAGGTATAAGCACCTTCATCTGCTAGCTCAGGCATGCTGGAAATCTCTAAAGGCCAG
GCTTGTGCGTCGGTAACATGCCAGTGTAGCCTATTCATCTTGTTGAAGGCCATGGAGTCA
ATCATGGCATACATTTCCTGCATGGGCTTGAACGTGCGAGACGTGTCAATGTTCAAGCCT
CGCCATGGGAACATAGGCGAGTCAGCGATGTGGACCGGCGCGAGCGTGGTATATACGCCC
TCGCCTTTGCTGCACTTGTAGAACAGTTGCGTGAACGTTGTCAAACCATAAGAAAGCCCG
ATAGAGGATCCGGCAGTGATGGTAACCTCGCCGTTGGTGGATATATCTACCGTGTATGAT
TCATCCACGCTGCCAGTGGTAGGCTTTGCGATGCCTGTTGGATCGGAGGCGTTTTGCTGG
AGCGTAATCGACTTAAGATACGTCGAATCATCACCCAACTGAGGTTCGAAGTCGGAAAAG
CGTGGGTGGAATTTCCATGGGACGAAGTTCTTGTTGAACAGCGTATCAATAGTCCTCTCT
TTTGCATTCTCAACAATCTGGCTCGACCAACTCATGTTACCAGATGGGTTGCCATAAGAG
GAGCTCTCAGCGATCCGATA
>MATOU-v1_1305494
CAAGTAGAAGAGTTTGATTAGACAACTGTATGCGGATATACTTTAGCTACCTATGTAAGA
GTAGCAGTCTTCATTTCCAAGTCTCAGACCTAAACTATCTTGACTAGTAAACAGTAGGCC
AGCCGTTGTCATAACGGATCAAGTTGATGCCAAGTTGCGCGGTGCCAGCAGCGTTGTAGT
AATGGTAGACGAGCACGTCCGCGTCGTTATCGGTGAAGACAGCAGGGTGGCCAGGTCCAT
GGATGTTGCCGTGGCTGGCTAGAAGCTGGGTCCCGCCGCCCTCCATCATGGGCGTGCCAG
CCTTGTCAGCGTAGGGGCCGGTGATACTGCTAGAACGTCCGACCATGGTGCGGTAAGTGC
TATCGACGCCCTGGCAGCACTTGTCGAAAGCGGCCCAGAGGTAGTAATAGTTGCCGTGCT
TGGTGATGTAGGGAGCTTCGATGGCGCCGCCGTTGGCAGGGCGCGCGGCGATGGAGATGA
GATTGTTGCTGTTGATGGGCTTACCGGTCGAAGGGCTCAGCTCGACAAGCTTGAGGCCAG
ACCAGAAGGAACCGAAAGAGAGCCACCACTTGCCGTCAGTGTCGACGAAGAGGTTAGGGT
CGATGGCGTTGTAGTTGCTACTGTCGGACGACTCGACCACGAGACCCATGTTGGTCCACG
AGCCGGAGGCGCCAGTCTGGCTTGTGGCGAAGAAGATCGCCGAATGAGTCCCGCCAAAGG
TAGAGGCCGAGTAGTACATGTAGTATTGACCGTTATGGTAGGAGAGGTCAGGTGCCCACA
AGTTTTTGTCGCCATTGGTGTAAGCGGTCGTCCAAGAGGCGCCATTGGGGAATGCGGCGC
CGATGTCGTTCCAGGTGGTGCGGTCTGTGGATGTCTTGAGGCCAACGCCATTGGCTGTAA
AGGCAGCGAGATAGGTGCCATCGGGTTTCTTGACTACAGTGGGATCGTGGATGAAGGTGT
CGCCGTTGACCGGACCGGGGTCGATGGCTCGCTTCTCCAAGGACGAGGCGAACGCTCCGA
TGGCAAGGATGCCTCCGGTGAGGATGCTGTGGAAGGAGACCATGCTGCAAGGCTCCAGCG
AACGACTGGGTTGGCTGTTAGTAGGATCTCGAGATTGTATCCAAAATATCGAAGAGA
>MATOU-v1_1305576
GGCGATGGTGTTTACATTCTCGCACTCGACCCAGATCCTCTCGGCGATTGTGGCTCAATG
GCCTGATGAAAGCTCGAAAATCTTCTATATTTTTTGCCCTTGTGAGATGTCCACCGCATT
CCGCGTGCGCAAATATCTAGGTCAATGGGCAGATTTCGCAGTCCATGCAAACCCCAGGCC
CAATTCAAAGCTAGCTCGACCAAATTCTCCAAAGAATCTCTCAGGAGCATCATCAATCCC
TCTTATATATCCCCGCACCCCAGCACACCCGCAGCATAGCCAGACCCCACGCCATGCCCA
AACTATCCTTGATCACATTCAACTTACTCCCCTTGACTTCCTTCCACCCGATCGCCACTT
CCGTCATCGGGATATCGGCGCTCTCGGCTAGCATCAACATTTCGACGTCGAAGATCCAGC
CTTCTGAGTGCATGTAGGGAATAATATACGGTAATGAAGGCCGGGAGAAAAGCTTAAAGC
CGCATTGGGTGTCCTTGATGTGAGATGTTCGGGGAGTCGTGAGGGTCCAGATTAGAAGAT
GGAAGGCGCGCATGAGGGTGTTACGGAGGAAGGAGCGCTTCACGACGGCTTCGGTGCCAA
CCATATGCGCTCTGGAACCTACGCCGACCGCACGGCCCTGCTTATCCTTCACTTGCTCGC
AACCCTGGACAAGCTTGCCCAGATCGGTGAATTTGCTGGCTCCGTCCGCATCGGCGAAAA
CAACATAGGTGCCTCTAGCGTGCCTCATACCATGTGTCACAGCGCCGCCTTTCCCACGAT
TCTGCTCCAGTTGAACCACACGGATCGTACCAGGCGGGATATTTGTAGGCTTGGCATTGT
TCTTCCCATGCCAGGGGCCGTTGGGTACCGGTGGAAATCGATTGAGTTGGTGTGTCTTTG
CAAACTGTAGTGCCGTCTGGACGGTCCTGTCTTTGCTCCCGTCCGAAACGACGATGATTT
CCCATCCTCGCCATTTGTCGCCCTGCTGTCCACTAGCCTGGAGCGATCCGTTGCTGCTGC
TCTTGCTGGGGGTACCGTGGTGACCATATTGTGCTTCTAGGTATTCTACTGCTTCCTCCA
GCATACCGCTTAAACGCTCTTCTTCATTGTAGGCTGGTACTACGAGGGACATGAAGACCT
CTGCGTCGCTTATTTGGTATGCCTCCTCGGGTGAGATTTGCTTCTCTCGTGCCATCTGCG
TAAGGGCGACATGGTTGTCGTACCAACATGGCAGCGGTTGCAGCTTGGACACCGTTCCAT
CGGCTTGGAAAGTGATGAACTGCTTTTCTGAAGCTCGCGGAGGTCGGGGTTTAGGTGCTA
TGAACAAGAGTGTAGTATATGCCAGGACTATGATACCGAATGCGCCCACTACCGCACCTC
CTGCCCATGCCCATAGGGGGATCGAGGATAGCTTGTCCAATGCCGCCCAAGCTGATTCGG
GGATTGCATCTGCAGAGTCCATTGCTGTCCAGCTGGCTGGTGGTTCAGGGATTATACCAA
AGTATGAAGAAAAGGATGAGATTAGTCTTCTGGTTATTCTCCCTTATTTACACATCGTGT
TCTCATTCCC
>MATOU-v1_1305841
ACATGGGGGGTCTCGACATTGCTAATATGCAGCTCATATCTGGATTGCTCGGGCTGCTTG
CAGCGAGTAAGGCGGCCAGTGCCTTCCAGCTCTGGCCGAGTGCATTTGGGATTCCTGGTG
TCAATGCTACCTACGACTATGTAGTGGTTGGGGGTGGAACGGCAGGGAACACGATTGCAG
CTCGGTTGGCCGAGGCCGGATGGAGCGTTGCTGTGATTGAAGCTGGCGACTTCTACCAGA
CAGACAATGGCAATAACAGCGTGATTCCAGGTGTTGCCACAACACAGTATACTGGGTCCG
ACCCAGAGGACGTCCAGCCTTTGATCGACTGGGGTTATGTGACTACGCCGCAGCCGGGCG
CAGGTGGCCGCAGACTGCATTATGCCTCCGGCAAGACATTGGGCGGAGGCTCCGCTCGTA
ACTACTTTGTCTACCACCGTGGTACCATAGGGTCCTACCAGAAATGGGCAGACGAGGTTG
GCGACCAGAGCTACACGTTCGCCAACCTGCTGAAGTTCTTCAAACGCAGCGTCAACCTCA
CTCCGCCGAACGAAGAGAAACGTTTTGACAATGCCACAGTCCGGTACAACCCGGCTGCGT
TCGCGAGCTCAAACGACTCCAGCTATCACCGTCCGCTCTCGGTCACATGGGGCAACTGGG
CAGCACCCATTGCCACATGGGCGAGGCTTGGAATGGAAGCTATTGGGATCCCGCCAGCCG
ACGATACTAACAGCGGAGAACTGCACGGCTCGAGCTGGACCCCTTCGACGGTCGATGTGG
AGATGCACCGAGAGTCCTCTCAGACCAGCTTCTTGGACTACGCCATTCATTCTACGACTG
GGCTGCAAGTTTACACCAAAGCTCTTGCGCGGAAGATCCTCTTCAATGGCAACGCCACCG
CGACAGGCGTCGTAGTGACCACGGCAGGGTACAACTTCACCCTTTCCGCTACGCGCGAGG
TCATCCTTTCAGCTGGGGCTTTCCGCTCGCCGCAGATGCTCATGGTCTCCGGTGTCGGCC
CAGCGGAGACGCTCGAGAAATTCGACATCCCCGTCGTTTCGGACCTCGCAGGTGTCGGCC
AGAACCTGTGGGACCAGCCATTCGGATTTGGCATTTCCTACCGCGTGAACGTCTTGACGG
GCTCGAACTTCGCCCTCGATCCGGTCTTCGCGGCGAATGCGGTGGCGTCGTATCTTGCGA
ACGCAACTGGGCCTCTTGCCGCTCCGGCTTCGTTCCTGGCATACGAACGGATTTCAGACG
CAGCGCCTGAGCTCCTTTCCCACTCAACTATCGAGGCGATCCGGGGCTGTTTCCCCGCCG
ACTGGCCGGAAGTCGAGTACCTCGCAGCAGACGGCTACTTCGGATACAATCGCAACTACA
TGACGGGAAGTGTCGTGGACGGGTACAACTACGCTACCATCTCCCCTGTCTTAATCACGC
CCTTCTCCCGCGGAAACGTCACTATCAGCTCGGCCGATATGTCGGACTACCCTGTCATCA
ACCCCAACTGGTTGACTACGCCAGAGGATAAGGATATCGCTATTGCCGGCTTCAAGCGCG
CGAGACAGGTGTGGGAGAATATGGGCAATGTTACTATCGGGGAGGAATACTTCCCTGGTC
CAAATGTCACCACCGACGCCCAAATCCTCGAGTTCATCCAAAAGTCCGTGATCGAGATCT
ACCACGCTTCGGCGACGTGTAAGATGGGTCGCGCCAACGACCCGATGGCTGTCGTCGATC
CGCGTGCGAGGGTCTACGGCGTGAATAGCCTGCGAGTGGTGGATGCCTCGGCCTTCCCGT
TTCTGACGCCTGGACACCCGCAGTCGGGCATTTACATGCTTGCTGAGAAGATCGCAGATG
ATATTTTGACCGGTGGGACTCAGGCAGAGTAATCATGACGGGTAATTTTCGTGCGCAGAA
ACGTTCTATCGGCTGCAATCATGAATAGACCGGGTACAGACCGGTCCAATTTCAAATGAC
CACCCATACGAGGAAAATCGAACACTTAATCATATATCCTTCGGCTCCGCAGCGGCCAAA
GACACCTTCCTCGCCCCCTCCTTCTCAT
>MATOU-v1_1306667
GGACTTACCAGGGCATTACTATCGAAAACTGCTCCGTGGGTCTCGACATGTCTTCAGGAG
GCCCAGACAATCAAGCAGTAGGCTCAATGACGTTTATTGACTCCAGCATAAGCAATACGG
GAGTCGGCATCAAGACGGCTTTTGGGCCCAATTCTCAGCCCCCTGCGGCTGGCTCATTAA
TTTTGGAGAATGTGGACTTTAACAATGTTCCAATCGCTGTTCAGGGTGCCAATGGAGCCA
CCGACTTACAAGGCAACACACATGTGACAGCGTGGGGCCAGGGCCACTCATACACACCAA
ATGGGCCGAACAACTTCAAGGGAATCATTAAGCCTGTCAACCGTCCAGCATCTCTTGTAC
AGGGAAATGGAAGATACTACACCCGAAGTAAGCCCCAATATGAGCAGCATTCGCTGAACG
AGTTCGTGAGCGCTCGGGACTACGGGGCGACCGGTGACGGCCACACTGATGATACTAAGG
CACTGCAGCGGGCGATCACAGAAGCCGCTGCTCAGAACAAGATACTCTTCCTCGACCACG
GAGACTACATCGTCAGGACAACCATACGGATTCCAGCGGGGAGTCGCATCGTCGGAGAAA
CTTACAGTGTCATCTTGTCGCAAGGTTCCTTCTTCAATGACATGGACAGTCCGCAACCAG
TGGTGCAGATCGGTACCCGCGGCGAGACAGGATCGGTCGAACTAAGCGACTTCATTGTCT
CTACACAAGGTCAACAGCAAGGTGCGACCTTGTTTGAATACAATCTGATTTCTGCCGCGA
GCTCGCCTTCTGGCTTGTGGGATGTTCATGGACGAGTGGGTGGGTTTGCGGGCAGCAACC
TACAATATGCGCAATGCCCGAGCACACCGGGCACGACGATTGACTCCGGCAACCTTGATC
GGAACTGCATTGCTGCTTTCATGGGAATGCACATCACAGAGTTAGCCTCTGGCCTTTACT
TGGAAAACGTTTGGCTTTGGACAGCTGATCATGACATTGAGGACCCTGGCCTACGACAGA
TCACTATATACGCAGGCCGCGGCCTGCTTGATCAAAGCAAGGCAGGTACCATCTGGCTCT
ACGGCACCAGCTCAGAGCACTTCACTCTTTACCAGTACCAGTTTGCCGATGGAGCTAGGA
ACGTCTTCGCCGGTCAGGTCCAGACGGAAACGCCATACTACCAGCCAAATCCTTCGGCAC
CTTTACCTTTCCCGTATGTGGCCTCACTGAGCGACCCCAAGTTTCCGAGCAAGACTGCCA
CGGACGGTAGCTTGGTCATTCCGGACGCCAATGCCTGGGGTTTGCGTATCGTTGACTCCT
CCGCTATATTCGTCTACGGAGCTGGATTGTACTCGTTCTTTAACAATTATAGCACCGCTT
GCTCGAACCAAGGAAACGGAGAGCAATGCCAGAACAGCATCTTCGACCTCGAGAATAGCA
AGGATATCACTGTGTACAATTTGAACACCGTGGGAACGCACTATATGCTGGAGATCAACG
ACCAAGTGTCGGCGATTTATTCGCAGAATCTGGACGGCTTTGTGGATACTATTGCATTGT
TTCGAAGCAATTGATCTCTGTTGGATAGCTGTCTATCTGAGAGCTCTGCTAGCTCACCTG
CAGCCAGTGTCAGGTCGAGTGGGCTGTTGCTAATTGCTCCAACCGCGGGTCGCCACCATT
TAGGTACATTCGGTATGTAGCTTTCGGTACAAGCGGCA
>MATOU-v1_1307305
ACATGGGGTCAAAGATCAACTTACAACCTCATCGCAACCAAATCAATAGAAAGACACAGA
ATCACTCCTTTCGCAATGGCTGACCCCAAGCCGCTCGTGAACCACATCTTTGCCGCTGAC
CCAAGCGCCCATGTCTTCAACGGCAAGGTCTACGTGTACCCCTCACACGACCGGGAGACA
GACATCGAAGACAACGACAATGGCGACCAGTACGACATGGTCGATTACCACATCCTATCC
ATGGACTCGATCGGCGGGCCTGTTACCGACCATGGTATTGCGCTCAAGGTCGAGGATGTC
CCCTGGGTAGACAAGCAGATGTGGGCGCCTGATGCCGCGGAGAAGGATGGAAAGTACTAC
CTCTATTTTCCTGCCCGAGACAAGCAGGGCATCTTCCGCATCGGCGTGGCGGTGGGCGAG
AAGCCTGAAGGCCCCTTCAAGCCTGACCCGGAGCCTATCCCTGGCAGCTACTCGATCGAC
CCAGCAAGCTTCGTGGATGACGACGGCCAGGCCTACCTGTACTTCGGCGGGATCTGGGGC
GGACAGCTTCAGTGCTGGCGCACCGGGAAATTCGTCCGAGAGGCGTTCGAATCGCAAGAG
GCGAGTGGCGATGAGCCCGCGCTGTTCCCTCGCGTCGCCAAGCTCCAAGACAACATGCGC
GAGTTCACGTCCGAAGGCGTGCAAGAACTCGTCATTAATGACGAGGACGGCAAACCTATC
CATTCGTCGAAGCACGACCGTCGTTTCTTCGAAGCTGCCTGGATGCACAAGTACAATGGC
CGTTACTACTTCTCTTACTCCACCGGCGATACACACTACCTCTGCCACGCGATTGGCGAC
TCGCCTCTCGGCCCCTTTACCTATGCCGGCAGGATCCTCGAGCCAGTCGAAGGGTGGACG
ACTCATCATTCGATCTGTGAGTTCCAAGGGCGATGGTGGCTGTTCTACCACGAAGGGCGA
TGGTGGCTGTTCTACCACGACACGAGTCTATCAGGGAAGAACCATCTGCGATCGACTAAG
GTGCGGGAGCTAGTCTATGACAGTCAGGGGAAATTGAAGCTGGCGCAGGCCCAAGCGTGA
AATGGGGTTGCTACTTTTGAAGGGGGTTCTAGCAAGCCCATCCGCCATCTACGCTATAAG
TAGCACCAGA
>MATOU-v1_1307307
ACATGGGGTCAAAGATCAACTTACAACCTCATCGCAACCAAATCAATAGAAAGACACAGA
ATCACTCCTTTCGCAATGGCTGACCCCAAGCCGCTCGTGAACCACATCTTTGCCGCTGAC
CCAAGCGCCCATGTCTTCAACGGCAAGGTCTACGTGTACCCCTCACACGACCGGGAGACA
GACATCGAAGACAACGACAATGGCGACCAGTACGACATGGTCGATTACCACATCCTATCC
ATGGACTCGATCGGCGGGCCTGTTACCGACCATGGTATTGCGCTCAAGGTCGAGGATGTC
CCCTGGGTAGACAAGCAGATGTGGGCGCCTGATGCCGCGGAGAAGGATGGAAAGTACTAC
CTCTACTTCCCTGCCCGAGACAAGCAGGGCATCTTCCGCATCGGCGTGGCCGTAGGCGAG
AAGCCCGAAGGCCCCTTTAAGCCTGACCCGGAGCCTATCCCTGGCAGCTACTCGATCGAC
CCAGCAAGCTTCGTGGACGACGACGGCCAGGCCTACCTGTTCTTCGGCGGTATCTGGGGC
GGGCAGCTTCAGTGCTGGCGTACCGGTAAATTCGTCCGAGAGGCCTACGACTCGCAAGAG
GCGAGTGGCGATGAGCCCGCGCTGTTCCCTCGAGTCGCCAAGCTCAAAGACAATATGCGC
GAGTTCACTTCCGAAGGCGTGCAGGAACTAGTCATCAACGATGAGGACGGCAAACCTATC
CATTCGTCGAAGCACGACCGTCGTTTCTTCGAAGCAGCTTGGATGCACAAGTACAATGGC
CGTTACTACTTCTCCTACTCCACAGGCGATACACACTATCTTTGCCACGCGATTGGCGAC
TCGCCTCTCGGCCCCTTTACCTACGCCGGCAGGATCCTTGAGCCAGTCGAAGGATGGACG
ACTCACCATTCGATCTGCGAGTTCCAAGGGCGGTGGTGGCTATTCTACCACGACACGAGT
CTCTCAGGAAAGAATCATCTCAGATCTACCAAGGTGCGGGAGCTCGTCTACGACAATCAG
GGGAAATTGAAGCTGGCGCAAGCCCAAGCGTGATCAGGGGGTTTGCTACTTGACGGGGGT
TTCTAACAAGCCCATCCGCCATCTACGCTATAAGTAGCACCGGAGACAAAGGTAGACTCG
TCGCTCAGTAGCCATGCAATCAGATTCCCACATTCTTCCGAAGTTCCCAGCCGGTCGATA
GGCGTAGGCGTGTAGCTCGGGTCCACGCCCTCGAGCGCATTGCGCTTGTGCATCAAAGGT
GTCTCGATCGATCCCGGCGTAATAGCATTAACCCGAATTCTCCTCTCCCCTTCCTCCTTC
GCCGCACTCTTCACCAGTCCAAGGATCCCGTGCTTACTCGCCGCATACGCAGCATGCTTA
GCGAAACCGAGCGTGCCCTGGACGGAACTCACGCACACTAAACTGCCCGGACCCTTCATA
GCTTGCAGTTCAGCGCGCATACAGTACATCATCCCCGTCAGGTTAACGCCCATGATGAGA
TCCCACTGGTCGTCCTCCAACTCGGAAAGCTTGCGCGTGCCGTGATGTTTGCCAATCACG
CCGGCACAGTTCGCCGCGCCATCGAGCTTGCCGAATTTCTCTAGGATGGACTTCGTCCAG
GCTTTGACTGCCGAGTTGTCGGAGACGTCTAGTTTCGTGACCTGCACGCGCTCAGATGCC
GAGCTGAGAAGTTGCGCGGCGTTGTCCAACGCCGCTTGATCAATGTCCGCAATCGCTACA
CTGGCGCCGCGGGCGTGGAGGATCTGCGCAGTGGCGAGGCCTATGCCGGATGCACCGCCG
GTGAGCGCGATGACCTTCCCTTGGAAATCGTTATCCCGTCCCATGTTGGGGTCTAAACCT
TGATTGCTGAAATAAACAAATCCCTAAGTCACGCAAGTCTGTTGAATCCCCATGT
>MATOU-v1_1308339
TGCTCGGACCAGAAGCTGGTCGAGTATTTCTTCGACATCGAGACCTGCACTTGCCGAGAC
TCTCCCGCCTTGAGGAAGCACTTGGTGAAGCCTTTCAGCTCCTTGGCCGGTCTTCTTATG
CTGGGAGAAACCGGGGCGACATAGACTTGCACAACTTCGGCTCCATCTTTGCTACCGGTG
TTTGTGACTGTGAGAGTGGTGTTGATGGTATTGGCATCAGCTGAGACATTGAGTTTATCC
AGCTTGAAGGTGGTGTAACTTAGTCCGTGACCGAATGGGAAAGCGACTTGCTTCTTGATC
TTCTCATAGAAGCGATACCCAACGTAGACGTCTTCGCCATACCAGACTCTGTTCTCGTCT
GATGAGAAGTTCAAGTATGCCGGGTTGTCCTCGTTGCGGATTGGGAAGCTCAGAGATAGC
TTGCCGCTCGGGTTCGTCTTGCCAAACACCACATCTGCTATTGCATGTCCAGTCTCGTTA
CCGCCATACCATGCCTGTAACAGAGCAGAAGTTTCCGCTAGCCACGGCATGGTTACTGGA
GTGCCAGACTGGTTGACAACGACAGTGTTGGGGTTCGCAGCGAGGACTGCGTTGACGAGG
TCATCAGTGCCCGGTGGCAGGTCCATATGTGCTCTGTCGTAGCCTTCAGACTCCCAGTCG
CCATTGAGACCAATGCAAAGCACAACCTGATCATTTGCCTTGGCGCACTCCACGGCCCTT
CGACGCTCATCGGCCATGTCAACCTTGCGGTAGCAACCCAGGCGAACACCGCCGGCCCCG
AACCCTGTCGTCCCTTCTTTCACCAGCCTCTGGGTCGGGAGGGTTCCAAACTCGACGTGA
ACAGAGTGTTTCTCACCTGCCGTCAGGCGGCAACTGGAAATCTCTTCGATAGTGCCCGCG
CCGAAGAAACTATCGCCGGGAGTCTGCTTAGTGTCATTGTCCACGACAAGCTTGCCGTCA
ACAAAGATTTTCGCAATGCCAGCCACAGAGCAGCTGAACTCATAGTCAGCCGTCTCGTCC
GGGACAATGTAGCAATCAATGTCAGCGAAGAAAGTGTCATCTACTGGCTTCTTTGGGTGC
TTGTAGTCAGCCAGTAGTACATTGGAGTCGGTGATCCTCATGCTGTCAAAGCTCTTGCGA
CCTGGTGTACTAGGGGGCTCGAGGTAGAGGGTAAGATCAAGGCCCT
>MATOU-v1_1308543
ACATGGGGAGTGCACTCAGACGCGATCACTGGGCCGCGAAAAAGTCTTCGAGGCACTTCT
ACTGCTGCAATTTTCGATGATGCCCGACTGAAAGCCGTATGAGCGCCCACGTGGCGCGAA
AGGACTGTCGCTACAATGCCTTACAACATCGCGATGATCTCTGACTTTTTCTATCCCCAG
CCCGGTGGTGTTGAGTCGCACATCTACCAGCTGTCAACTAAACTTATCGACCGAGGCCAC
AGAGTTATCATCATCACACACTCTTACGGTCCCTCTCAGCACGACAGCTACCCCAGCCGG
AATGGAATCCGATACCTCACCAATCGCCTCAAAGTCTATCATCTTCCACACTGGGTGGTC
TATCGCTCGACGACCTTCCCCACCGTCTTCAGCTCATTCCCAACACTGCGGCAGATTTTC
ATCCGTGAGCAGATAGAGATCGTGCATGGCCACGCCAGTCTGAGCAATCTCTGCCATGAG
GGTCTCTTGCACGCGCGGACTATGGGCTTGGTGACTGTCTTCACTGACCACAGCCTGTTT
GGGTTTAGTGATGCGGCGAGCATCATGGCCAACAAGCTCTTGAAGTTTAGCCTGAGTGAT
GTTGGGCATGTTATTTGCGTCTCGCATACATGCAAGGAAAACACCACCCTTCGAGCCTCC
CTCAACCCGCTCGCTGTCAGTGTCATACCCAATGCCGTCGTGCCGAGCAACTTCAAGCCA
TTGCAACCGCACGAGGCGAAGCTTTCTCAGCTGCAGCACAGTAGTAAATCCGCTCTTTTG
CCACCACCACCGGACCCGAGTCAGCCCTTGAATCCAGGCGACCCTATAACAATAGTAGTC
ATCTCCCGCTTATTTTACAACAAGGGCACCGATCTCCTCATCTCTGCTCTCCCCCTCCTT
TTGCGCCAGCATCCAAATTTGCGCTTTATTATCGCTGGCTCAGGGCCTAAGGCTATCGAC
CTCGAGCAGACCCTAGACAGTCTTCCCCAAAACCTTGTTCTCACACCATCCGGCCAGAGC
CGAGTCGTTTTACTGGGATCTATCCGTCATGAGGAGGTCCGCAACATCATGGTCCGGGCC
CACCTTCTCTTATCAACATCACTCACTGAAGCTTTTGGCACCGTACTTGTGGAAGCAGCC
TCTTGCGGGCTGATGGTAGTCGCGACGCGCGTTGGAGGCGTTCCGGAAGTCTTGCCAGGC
AATATGACTGTCTTTGTCCTTCCTGAAGTGGAAGATGTGGTTCGAGGCGTTGGCGACGCC
ATAGGGATGCTAACGAACCGCCGCCGTGAGGGCGGTGGAGGCGGTGTGAGACGAGACAAG
TTCCACGGCCTGGTAAGAAACATGTACAGCTGGCATGACATTGCTCGCCGCACGGAGAGG
GTATATGACCTTCTAGTGCAGAGGATAATGCGGAATTCTACGACTCTCCAGAGTGGGCGG
GATACGGAGCAGGTGCGAGTAGTCAGATGCAAGGCGCTGCTCTTATCGACAGGCTCAAGA
GGTATTACGGCTGTGGAATCTGGGCTGGAAAGCTTTTTGTCATTGTGGTGGTCGTGGACT
ATCTAATCTATGTCATGTTGGAGTTCTTGTATCCACGGGACAAGATCGATGTCTGTAAGC
CATGGCCCGAGCCCAGGCGGGAAGAAGAGGCTTTCAAGCAGAATGAAGATGGAAGAGTCG
AGAGATACCAGCCGGTCAGAC
>MATOU-v1_1309003
GACAAGCTGTCCTCCATCCCCCTATGGGCATGGGCAGCAGGTGCGGTAGTGGGCGCATTC
GGTATCATAGTCCTGGCGTATACTACACTCTTGTTCATAGCTCCTAAACCTCGATCCGCG
CGGGCCTCAGAAAAGCAGTTCATCACTGTGAAAGCCGACGGAACAGTGTCCAAGCTGCAA
CCGCTGCCCTGTTGGTACGATAACCATGTGGCCCTTACCCAGATGGCACGGGAGAAGCAG
ATCTCACCCGAGGAGGCATACCAGATAAGCGACGCAGAGGTCTTCATGTCCCTCGTAGTA
CCCGCATACAACGAAGAAGAGCGTTTGAGCGGCATGCTGGAGGAAGCAGTAGAGTATCTG
GAGGAACAATACGGCCACCATGGCACCCCAAGCAAAAGCAGCAGCAACGGATCACTGCAG
GCGAGTGGACAGCAGGGAGACAAATGGCGAGGGTGGGAAATCATCGTCGTCTCAGATGGG
AGCAGAGACAAAACCGTCCAGACCGCTCTGCAATTCGCAAAGACTCACCAACTCAACCGA
TCCCCACCGGTACCTAACGGACCCTGGCATGGGAAGAACAATGCCAAGCCGACGAACATC
CCGCCTGGTACGATTCGGGTCGTTCAGTTAGAGCAGAATCGTGGCAAAGGCGGTGCTGTG
ACACATGGTATGCGGCACGCCAGAGGCACCTACGTTGTTTTTGCCGACGCCGACGGAGCG
AGCAGGTTCACCGATTTGGGCAAGTTGGTACAGGGTTGCGAGAAGGTGAAGGATAAGCAG
GGTCGCGCGGTCGGCGTAGGCTCCAGAGCGCACATGGTCGGCACCGAAGCCGTCGTAAAG
CGCTCCTTCCTCCGTAACACTCTCATGCGCGCCTTCCATCTCCTGATCTGGACCCTCACG
ACCCCACGCACATCCCATATCAAGGACACCCAGTGCGGCTTCAAGCTTTTCTCTCGGCCC
TCGTTACCGTATATTATCCCCTACATGCACTCGGAAGGCTGGATCTTTGACGTCGAGATG
TTGATGTTGGCCGAAAGCGCCGATATCCCGATGACGGAGGTGGCGATTGGGTGGATGGAA
GTCAAGGGGAGTAAGTTGAATGTGATTAAAGACAGTTTGGGCATGGCTTGGGGGCTGGCT
ATGCTGCGGGTGTGTTGGGGTGCTGGGATCTACAAGAGGGATTGATGGGGCTCCTGAAAA
GTCTTCGGAACTTGGCTATGCGCCCTGGCTTTGTGTTTGGGCTAGGACTTGCATGTATTG
CCGGATCTGCGTTACTACTCAGACGTCTTGCATTTGCGAATTTTAGTGGGCACCTCACAG
TGGCAAAAGTGTGGCAGACCGTCGAGCTTCATCAAGTTGTTGAGCCGTAATCACAGGGGG
AGCTGAATTGCAAGTGGATGAGAATTGGCTAGCCATGGATCCTTATTTCAAGGCCAAAGT
AGGAAGAAGGGATGCGGTCGCAAGCTCGAGTTGCAGCACGTGTGAGCTGAAAAAGTATTA
CACGAGGACGATGGACAGACGACAGTCCTGAGCATGTCTCGCAAGGAAATGGTATTGCAC
GAGGTAGTGTCGTGACCACCAAAAGCTTTAGTATCGGCGGGCACCGTCTAGTTAACACCA
AAATACGCAACCCCAAATGTTGCTCTCCCCGTCCTGCCGTCTCAACCCAACCGCAACGCA
CACGCAGCCAACTCCTGCTTAACATTCTCATCCCGCGGCAGATAAATTGCAGCCACACGC
AACAACTTCCTCGCGCTCGTCTTATCATCCATCGCCTTCTTCGCCAGCGCCGTCCGATAG
TAGATCTTCCCCATCTGGTTCGCCGCGGGGAAGCCCAGCACCGCTTCATCTTCCGGCGGG
ATATCATACCGATCGTCCGCCCCCATCGCCTCCCGGATCATCCCGATGGACCGCATGCCC
CAGAACGCGCATTCCTCCCACTGCTCCAGCTTGATGTACGCGAGACATGTGTTCGCTACG
AGCTGGACTCGTAGGATCAGTCGCTCGGATTGCCCGTTCTTCCCCGTGAAGGGCTCCTCC
CGCATCTCCCGTCCGAAGTAGTGGTCCGCGTGGATGTGCCGTCGACGGCCCTTGATCACT
ACGTGCATCGCCAGCCAGGCTTGGCGGTAGATCTCGAGCGCTTCTTTCGGATGCCCGGCT
GTAAGTTTGGTGTTCCCTTCGGCTTTGAATTGGATCGCTTCGCGGAGACATTGCTCCGGC
CGCTTGTGTGGTTCTTTCTGCAGCTCGCGGAGTTCTGCTTCGACGGAGGCGTCGGGCTTG
GGATCGCCGGTCACGACCATTGATCGGAGGTTCTTCACTTGGGCGAAGGGTAGGAGGAGG
CGACGTTGGAGTGACTTTTGGAGATGCTTTTCTTGGTGAGGTCGAGGGTCTCGCAGTGTG
AGGTCAAGCCTGAGTTGCGGGTTGAGAGCTTCGTGCGATAGGCTGGAATAGAACCACATG
GTGCAGAACTTGTCCAGGTCTTCGAGTAAGATCAGGAATCGTTGTTCGTCACCCGCCTCC
ATCGGCACTTCTGGAGCATCTATGCTCACTGTCATGCTATGCCCTTCGAACCTCGCTGCT
CTTCCCCCAGGCGCAATAAGTGGGACATGCCCCTCTCTAGCTACATGGAATTGCGCTTCC
GGCCACGGTGTTTCCACTCTTACGAAGGTATTAAGCTCTTGGAAGATCTTGCGAGATTCA
TGGTAGACCTGTCGGTTGACTAGGAATAGTTGGACGGCATCTTGGTAGCTGTATGAGGTG
TACTCGTCCTCGTGATAATGTCGGTTCGCATCTGGGTGAAGGATTAAGGCATAGATCTGC
TCGCGCAACTCGGGGGGAATCGTCATTAAGCTCGCCATGCTGGATTGCGTCGCACGTATG
CCACTAGAGAGGTATTAGTCTGGCAAGATGGGAGATCAGGTGTGGCGAAAACA
>MATOU-v1_1309210
ACAGGGGGTGTCGCCCAAGACGGCTTTAGCTGTGCATATTCGCGACTGTCATTCTGGTTT
TGAGGCAAGACCTTGCGAACACGGGTGTAACCCATCGCATCTTTACTCTATACCGACCGC
GTATAGGACTCACATAAGCAGACACCACAAGGACAATGATAGTGGATATCTAGCGCTATG
TACCTTCCCAGGTTGTCAGTGTACTACTCGTCATCATTGTCGTTCGCGTTTTGCTACACA
TCTATCAAAGGTGCATTCTGTAGCGGCAGACGACATCGAGCAATATCTGCCAAAGCCACG
AGGAGCGCGGAAATTCGTGCAAGCGACCTGCGTCGAGCCTGGTTGTAATCGATCCTTTAC
CAAACCAGACAGGTATAGAGAGCATTTGTCGAAAATTCACAACAAGACCGACGACGAGCT
GAAGGACACGCATGCCGTCTACCAAGATCCACAGCGCGGCACAACGCGGGCAGTAAAGTC
AACGACGCTCCAAAAATTGACGGTTTAGAATGGAGGCTGAAGGAACGGAGCAGGCGGAAA
GGGCAGGGAGACGGACTTTTACAATTACGATCCTAGTGTGCTTTACAACGACTCTGCGTA
CCCGGTTGGCCGCTTCAGCAACGAGTTCGGTTATCACAGCATGCCAAGTATTCAATCATG
GAGAAGTCAGATTTCCGAAGCAGATCTTGACTTCAACAGCTCGACAGTCATGCTTAGGGA
TCACCATCCACCCGCAGAGGGACTGAATACGTCAAATTTCGCCAATGCTTCCATAGGCCA
AGCACAAATGACAGAGGCTGTTGAACTGTGGTATCCTACACCGAATAAGACAGACTCGGT
GGCGAACTTCAGCGCTTGGTGTCACGCCACGCAGATCTTCCAAGCCGATCTATATGTTTC
AGAGATTCGCTTCTACCGCAGGGGTTCAGGTCTCCCGGAAAGGCAGCTTGGTAGTCTGTA
CTGGCAACTCGAAGACATTTGGGTTGCACCCTCGTGGGCAGGAATCGAATACGATGGTAG
ATGGAAAATCCTGCATTACGCGGCCAAAGATGCCTACCAACCTATCGTCATCTCGCCATA
CTACGACATGGCGACCGGAAATCTCTCAGCTTGGGTAACAAGCGACCTATGGGATCCGGC
GTCCGGCACAGCCAAGTCCCAGTGGTTCAATTGGGAAGGTAACAGGCCGCCGATCAACAC
AAGTTCCTCGGTCGACTTCAACATAGGGGCCATCAACAGCACCAAGGTCCTACAAACATT
CACCGGCGTTATCCTCGGCGACTATAACCCTGAGAACGTCGTCTTGCGGATGCAAGTGGA
GGCGGAAGGCAAGCTTCCTAACACTAACAGTACTCGTACGTTTTTGCATGAGAGTTGGTT
CCACCCAACTGCCCTGCGGTCGGCGAATCTTGTAGACCCAGGGCTTACTCTGGAGTACTC
TGAAAGCACTAAGAACTTCACGGTGACGGCGAAGACCGGTGTAGCCGCTTGGGTGTGGCT
GGACTACCCGGCTGGTGCGGTCGTCGCGTTCGACTCCAATGGCTTTTGGCTTGGAGCGGA
TTGTTCGCGGGAAATTGGCTACAAGGTGAAGAGTGATAGCACCGACGGGAAATGGTTGGA
GGGCGTGACTGTGCAGTCGCTTTACAATCAGACGCTTCCTTACTAGTTGAGGTTTGGGGA
AAGCAAAATGTATAGCTCATATGTTGTCGACAGCATGGAACTCATGTCATCC
>MATOU-v1_1309481
ACATGGGGGACACGCGGTAAACATTTGATTGCACGCTGGAGCACATCTACAAGGACAATA
TCACCATGTCAATCAACTCTGAAGCCATCTGGGCTGCAGCACCGACAACTGCTCGGGGCA
CGTCCACGCCGCTCAGCTCCGACGCGAAGGGCGAGCGGATCGCCTACGCGTCCAACAAAT
CCATCTTTGTCCGCTCTATCGACAATCCCGCCGAATCGAAGCAGTACACGCAGCACACCG
CCCAGACAACGGTCGCACGCTTCGCCCCCTCAGGCTTCTACATTGCGAGCGGAGATGTCA
CCGGCAGCGTACGAGTCTGGGATGCCATGGGGGCTGAGAACACCAAAGGCGAATATCACA
TCATAGCAGGCCGCATTAACGACATTGCATGGGATGGCGATAGTCAGCGCATCATTGCAG
TGGGTGACGGTAAAGAGCGGTTTGGCCATTGCATTACAGCAGACTCCGGGAACAGCGTTG
GTGAGATCAGTGGGCATAGCAGCCAGATCAACTGCGTGAGCATACGGCAGCAAAGACCTC
TACGGGCTGCGACAGGCTCCGACGATGCCAGTCTGTGCTTCTTCCATGGCGCTCCCTTCA
AATTCAACACCAGCGTGAGAGGGAAGCACGATAAATTTATCTACAGCACACAATTCAGTC
CAGACGGCAGTCTGCTGGTCAGTGTCGGCAGTGATCGGAAAATTTGGCTCTACGACGGCA
AGACAGGCGAAGCAACGAAGTCGATCGGGGAGGGTGAGCACAAGGGCAGCATCTTCGGCG
TAAGCTGGGCTAAGGACAGCAAGAAATTTGTTACGTGCTCCGGTGATCAGACTGTCAAGA
TCTGGGATGCTGAATCAGGCAAGTGCACACAAACATGGAGAATGGGCGGCGACGACGGCG
TTAGCGTACAGGACCAGCAAGTTGGCGTCACATGGCCAGCTGGCAGAGACGATGGCCTCA
TAATCTCCATTGATTTGGAAGGCAACCTCAACTACTTCCAAGAAGGGAAGGAGAAGCCTG
TCAGTGTCGTCTCAGGCCACCAGAGAGCCGTCACGGCGGCATCTTACCTCCCCGACAGCA
AGACACTTTGGTCCGGCAGCTATGAAGGGCGTGCTCGTGCATGGAATCTCGGCGACGGAA
CTGCAGACCTTATCGATGGTGAGACGCACTCAAACTATGTCTCGGGCATCTCTGCGTCGC
AAAGCGAAGGCCGTATCTACAGTGTGGGCTGGGACGACACTTTCCGGACCATTGACGCGT
CTCAGCGCTCCTTTACTGGCAATGCCTCTAAGACTGACGGACAGCCGAAGGGCGTCGCCG
TTGCAACGATTGGCGGCAAAGCTCATACTCTGGTTGCCACCATCAACGGTATCACGACGT
ACGCTGATGGCACTGAAGTGAGCAAACAAAAGCTCCCTGCCCCGCCTACTTGTGTCGCCG
CATCTGGCGAGACAGTGGCAGTTGGATCAGACGATAAGAAGGTTCGTCTATTCAAGGCCG
GATCTGCTGCCGCGTTCGAAGACATGGTTGAGCTTGCTGATCCCACTTCGCCAATCTCCT
GTCTCGCCTTCTCACCAGACGGGTCTCACCTTGGAGTCGGCCTATCTAATGGCAAGATCT
TTGTGTACGCATCTTCAGGCGGCTCATGGAAGCTAGAAACGAACAGGTGGTCCGCTCACA
CCGCGAGAGTGACATGCTTGGCTTGGTCGCCAGACAGCAAGAAGGCCGTTTCTGGAGCTC
TCGATACGAACGTGTTGGTGTGGAGCTTGAACGATCCAGGAAAACGGATCCGCGCACTCA
ACGCCCACAAGGAGGGCGTTGGCGCGGTCGTCTGGGCCGAGGACAGCAAGGTCATTTCTT
GCGGTGCAGATGCGGCGGTAAAGGTATGGAAGGTGGAGAATGTGCCTTGATTTAGAGCTC
GAACGAAAAGCGGTCAGGAAACACTTCGAAGACTACCAAACCTCACACGAATTACATCAT
AATTCCCCATTGCACAGTATTACTGCCGCCTTCAAGATCTTTACAGCAGGATGATTCAAT
GCGATGGGATCGAACAAATGCCAGGCAGCTCGGTACACTAGAACTATCTCCTGAAAAACC
ACCTACAACCGAAGCCTCAGAACTGACACAGAGAGAAGAGAAGAGTGTTGTCTCGGCCTT
CAAAGGGCCACCATTGTCTAACAAATGTCGAGAGACGCGTCACCAGTGATGCTCCAGCTG
ATATTCTCTCCACACGGCGACTCCCTGACCGTCGTGCCATCCACCTGCAAAGTAATCGAG
ACATCACTGGTGTTAGGAAACTCATCTCGAGCCGCAATGCGTACCTCTCCACCTCCATCC
ACTGTGCCATCCAGAATAGCAACGTTGTAGCAGTTCTCGATCAACACCGCATTGTTCCCA
TTGTCAGCAAGGTCGACAGATGCGATCTCTGCAGCACCCGATTGCGAAACACAGAAGACG
CCACGACCGCCGCCTCTCGAGACAACCCGGTCGATGTATACGTTGGTGTCGTAACTCCCG
TCGGCAAGCTGACCATTGTTGTTCGCCATTCTGAAAGTTGCGTATCCGGTGCCTGCGGCA
ACGTTGTCGCCGTCGACCAGGCCGACTTGCGCGTTAGTCGTCTCTTGCAGCAGTAAACCG
CACTCGCCGACGTCTCTTGCAATGACTGCGTCGATGGTAAGGCCATCAATGTTCCAAGTC
TCGACTGCATGGCTGCTAGCTCCGGTGACAGTAATTGTTCCCATTTTGACGTTGCTGTTG
GCGGCCTCATCACGATCAAACCGAATCCCCAGTCCGGCGCTTAGATCGAGATTAATCTCT
CCCAGCGTCAAATCGGTAGTGCCATAGAAATGCAGGCCAAAGTATGGATCGCCAGTCATG
CTCAGATATGGAATGCTGACGCCAGTAGTACCCAAGGATTCGATGGCGCCAACGCCTGCC
TTGTAGCCTACATTGATCGTACCGCAACCCTCGAAAGTCTTGCCGCTGTCGATACTGATG
GTAGAAGCTCCAATGTCGCCTGATGCAATGACAGAGATGCGCTGACCGCT
>MATOU-v1_1310275
ACATGGGGATTGACAAGAGTAGCGGTCTCTTAAAGCAGTCCCTCTAAGACTGGAGTCCAA
CTCTGCTGTGTCTATATCATTATGGCCAGCTATTCAGTGGCAGTCGCTGAAGAGAAGATT
GATCTGCTCAAGAAGAAGCTTTCACTTGCTACGTTTCCTGACGACCTCGAGGACGCAGCG
TGGGACTATGGAGCACCTCTGCAAGACGTGGAGCGTCTCGCAAAGTACTGGGAACAAGAA
TTCGATTGGCGAGCTCAGGAAGCAAAGCTCAATGCCCTCCCGAACTACCACAAAGGCATT
CGCGTCGATGGTTTCCCAGAATTGGACATACACTATCTTCACCAGCCATCCGACTCCCCA
GATGCGATCCCACTAATCTTCGTGCACGGCTGGCCCGGCAGCTATCTTGAAGTGTCCAAA
ATGCTTTCTGCCCTAAAGCAAAACAACAAGGGAGTCTCCTTCCATGTCGTAGCGCCATCG
CTCCCCAACTTCGGGTGGAGTGAAGGTCCCAAGAAGCAAGGCTTCGGACTGAAACAGTAT
GCCGAAACTTGCCATCGCCTGATGCAAAGCCTCGGCTACGAGAAGTACGTCACCCAAGGT
GGCGATTGGGGATTCTATATCACTCGATGTATGGGTCTTCTATATCCGGACAGCATCCCC
GCCAGTCACACGAATATGCTGCGAGCTCTACAGCCTACGTGGACCGGCAACCCTCTTCTG
GCGCTCCAGCATGCTGTAAAGCCATACACCGAGCGAGACAGGAAAGGACTTGAACGCAGC
AAATGGTTCGCGGAAGAGGGGTCAGGGTACCGTCTCGAGCAAAGCACTAAGCCACAGACG
CTTGGCTATGGCCTGACTGACAGTCCTGTTGGTCTGCTGGCTTGGATGCTGGAGAAGCTT
CACGATTGGACAGATGCGTATCCCTGGACAGACGACGAGATTCTGACCTGGGTGTCTATC
TACTATTTCAGTACAGCCGGCCCAGCGGCAAGCTTGAGGATTTACTACGAGGCCATCCAT
CCTCGTGAGGCTGGCGCAGTGACTCGAGACCGGACACAACAGTGGATTCCCAAGGTGAAG
CTTGGGTTGCTGCATGCACCGCGGGAATTGACCGTTGTGCCTCTGACTTGGGGTCGGACA
CTCGGTCCAGTGGTGCACGAAAGCGTACAAAAGAAGGGCGGGCATTTCTTCGCTTGGGAG
TGTCCGGATGCTCTAGTACAAGACTTGCGTGCTATGTTCGGGAAAGGAGGACCATGCTAT
AAGGCTGTACGAACGGGCGTAGCAAAGTTGTAAGTGTTTCGGTCAAGAAAGGGCACAAGA
TGCTCATACTGTTTATGTCCTTTCACGAATGATGATATTATGTTTATAGTAGTATACAGC
TTTCCGTCCGAGTTCCTCAGATGCGTCTTGAACGTCGTATATCTTGGATGCGGTGCACAT
ACTAATCCCAATTCATTCCTCAATGTGACGTACTTTCCTCCGTTAAAACCCCAGGTGTCA
CAGAAGCAGCTTGTGCAGGCAACCCGCCCACCGAAACACCGTCCACAAAGGCCCAAGTTC
CAACAAAAACCGAATAGCAATGCCCGTTACGCAGTCCATGAAACGTGGCTTCAGTGCCAC
GGAAACCATAACAGATGATGATTGCGCCAGGTGTATCTTGGTCCAGCACTGTGACCGCAT
AACGGTCAACCTTCCATTCGCCTTCCACTGGAGACCAGGTGATTCGGATCCCATGATCTT
TCGAGAAAGTTTGGATGTTTTGTGGCGGCGGCGCAGTATCTCTTCTCGCTACTGCGCCGG
AGATAGGTGACCATTTGCTCTTGTCGTTGTCGCCGTCCCCATTGTTGGTTCGTACTTGAT
ATTCCCAGGCAATGCCCGCAACGGTGAACGTAGTGTCGAACCGATTGCTCTGTGCCTGGG
CTACCTCCCATTTGTCTTTCCCTTGCATTCTATTCCGTACGTCGTAACCTCTCGCACCGA
AGACAGCATCCCAAGTCACGGTGACTCCCATAGGTGCACCCATAGCGACCAGGCTCGAGG
GAATATGTCTTGGTCGCTGAGGCATGTCTCGCCGGCTAGGCACTTGCAGTGCTGCATGGC
CAATGCCAAAGCAATCGTAAAGAGTAAGCGAAAAAGCACGAGCAATCTCAAACTCGCCAA
GGATATTCGGATGTAGCCCATCGTAGCCCGCTGGACAGCCATCAGGAGTGCAACTGTAAC
ACTGCGCTATGTTTACAGCCTGCAAAGGGGACAAATCTGACCCCATTGCATCAAGTAGCC
TAGGAAGTTGTTGATTGTATTCAGTCGTATTCTCCAATAGATCCTGCCGGCCATTCATAT
ACCGACGTTGCGGTATATTGCCAACCAAAAGGGTCACATCAGGTTTAGCTGCTCTCGCTT
CTTGTATGAAGTCTCGCATCCTTTTGAGCACCTCGGACGCCTGACAAAAGCCCCATCCGA
TATCGTTGAAGCCGAGCAGTGTAAGCACCAGATCCGGCTGGTATGCGCTGACCACATCCC
GAATCATGTCTTTTGCCTGTCCCAATTGCCAACCCCAACCAGAGAAATGGTTCCCTTGAA
AATCAGCAGGTACGTCGGCAGCATACTTGCCATCTGCTTTGACTGTGGTTTCGCTGTCCT
CTGGTTCCTCTGGCTCACCGAAGCCCAGGCGAGGCGGCTGCGGAGGCATAGGTTCCGCAG
GTGGATCTGTACCAGTATATGGACCTACAAAGGTGAAGTCATGGGACGTCGCATTCAAGC
GGAGCCACTGCCAGAGCCGATAGCGCCATGTATGATCGCCTTCATGACCTTGGGTGATCG
AGTCGCCGACAATGAGGATTTTACAGGGATTCGGCAGCGTAGCCTTCTGTGTAGAGGCGA
TTGGATCCGAATGTAGATGCATTGAAAGCCTTACAGAACATTCACCAATGTCGATAGACG
TGTTCGGTGAGCTTTGGATACCTGGTGAGGGCTCTGCTGTGCTACCAGAATTATTGTCAC
TCGTATGTGCTTGTGGACAGAACCCGGCCATGATGATCGAGCCCTTTTGCTTGCCGGGTC
TAGCTCGAATCCCGAATATGCGGGCTCATCACCAAGTATCTGCGGTGAGTCTTAGGATGT
GACCTGCGTGTATTCGGTGCAGTGGCAAGGGAGACAAATGGAGTACGGAGCGGACAGGAC
GATGCAATGAGACTAGCAATG
>MATOU-v1_1310332
TGGCCAGGCGTCCAACTGCCCGAGAACGAGGTTCCACATGTCAAGGAGCGCCTGTTCAAC
GAATTTTCCGCTGTGCCCATCTTCATGGATGACGACCTTGCCGACCGACACTACAATGGC
TTTTCCAACTCTATTCTCTGGCCTTTGTTTCACTACCACCCTGGCGAAATCACGTTCGAC
GAGTCTGCGTGGGAAGGATACGAAGAGGCCAACCGTCTTTTCGCGAAGGAGATTGCCCCT
GCTGTGAAAGACAATGATCTCGTCTGGGTACACGACTATCACCTCATGCTGCTGCCCAAG
ATGCTGAGAGAAGAGCTCAACAACCAGCCCAATCCGCCTCAGAATGTCAAGTTTGGCTTC
TTCCTCCACACGCCGTTCCCATCGTCTGAGATCTACCGGATCCTGCCCGTGAGAAACGAA
ATTCTGGAGGGTGTCCTTCATTGCGATCTGATTGGCTTCCACACATACGACTACGCTCGC
CACTTCTTATCTTCATGCGCACGCATCTTGGGCTTGCCAACCACTCCAAACGGTATCGAA
TTCCAAGGCAAGCTGGTCGCTGTAGGCGCCTTCCCGATTGGTATAGACCCTGAAAAGTTC
GTTCAAGGTCTTAAGAAAGACTCAGTCCAGCGCCGTATCCAGACCTTGCAGAGCAAATTC
GAGGGCCAGAAGATCATCGTCGGTGTTGACCGTCTCGACTACATCAAGGGTGTGCCGCAG
AAATTGCACGCCCTTGAGGTTTTCCTGACTGAGCATCCAGAGTGGATTGGCAAGGTGGTT
CTAGTGCAAGTTGCCGTACCGTCTCGACAAGACGTTGAAGAATACCAAAATTTGCGTGCT
GTCGTCAATGAGTTGGTTGGCCGGATCAACGGAAAATTCGGCACTATCGAGTTCCAGCCA
ATTCATTTCTTGCACAAGTCAGTCAGCTTCGACGAGCTCATTGCACTTTATGCTGTCTCG
GATGTCTGCCTGGTCAGTTCAACAAGAGATGGTATGAACTTGGTCAGCTTTGAATATATT
GCTTGCCAGGAGCAACGTCACGGCTGTATGATTCTCTCGGAATTCGCTGGTGCTGCGCAG
TCATTGAATGGCTCGCTAGTGGTTAACCCATGGAACACGGAGGAATTGGCGGACGCAATC
CATGACAGCGTGACAATGGGTGAAGAGCAACGTGCTGTCAACTACCAAAAGATGGCCAAG
TACATCAACAAGTACACGAGTGCTTGGTGGGGAGAGACTTTCGTGACCGAGCTCAC
>MATOU-v1_1311223
ACATGGGGACTGGACAGCGGATCGGACGTCCGTCTGCCTCCTTGAAAGACGTCGATGGAT
CGCAAAGAAAACAACACCCCTGCCGTGCAAGAGAAAGCACCGTTCCTCAAGGGTGGGAGA
ACTTCGACGGCTGCCAGCTTCTGTAGGCGCCACAAAAAGATCGTTACCCCATTGGCCATC
ATGATACTCCTTTTGCCCCTCCTTGGGCTGCTTGCTCTCAGAAACGACCATGCTCACGCC
AGGAACTGGACTAGCCCTATTGTGTATCCCTCACCACAGGGATATGGTGCTGGTAATTGG
TCCAAAGCTTATCGAAGGGCAAGCAGAATTGTTGCGAACATGAGTCTCGAGGAAATGAAC
CACGTAACTCTCGGGGTTACCGACAACAGCAACGGTTGCGTTGGTGTATCTGGTGGCGCT
CCCAAGCACGGTTTTCCTGGAATGTGTCTCCACGATGCTGGAAATGGAGTGCGAAATACT
GACGGGGTAAGCGCTCCCGCTTCCGGCCTCTCCATTGGGGCTTCCTGGAACGAGACGCTG
GCGCTCGAAAGGGCCAGGTACATGGGCGCTGAGTTCAAGCGAAAAGGCGTGAACGTTGCA
CTTGGGCCTGTGGTTGGCCCAATAGGTCGCATTGCGCGCGGCGGAAGGAACTGGGAGGGG
TTCGCGGCCGATCCATATCTGGATGCCATCCTGGGAGCACAAACGGTGATTGGCTTGCAA
GAGAGCGTCATTGCAAGCATCAAGCACTTTGTGGCAAACGAGCAAGAAACCAATCGCAAC
CCAATAAGCACCGATGACGGTGTCATACTCAGCTCGAGCTCCAACGTAGACGATCAGACT
ATGCACGAGCTTTACGTATGGCCTTTCCAAGACCTGATATATGCTGGCGCGGGCTCTGTG
ATGTGCTCGTACAACAGGCTCAACCAGACGTACGCATGCGAGAACAGCAAGGCCATGAAC
GGCATACTCAAGGGTGAATTGAATTTCCAAGGCTTTGTGGTGTCAGACTGGGTAGCACAA
CACAGTGGCATTGAGAGCGCTAATGCTGGGCTCGACATGGCTATGCCAACAAGTCAGTAC
TGGAACGAGAGGCAGCTAGAGGAAGCTGCAAACACCGGCGCAATCAACAAAACCCGTCTT
ACTGACATGGCAACACGCATCCTGGCCAGTTGGTTTCAATTCGGTCAAGATCAGGCACTA
CCGCTCGGTAGCGGAATGCCGCCCAACCTGCTTATGCCACACAATTACATCGAAGCTAAG
GAGCCCGAGTCGAAGGCCTCGCTAATGCAACAGGCAATAGAGGGACATGTACTGGTGAAG
AATTCCAACCGCACGTTGCCTTTGAAGAAGCCAAAGGTGCTTTCGATCTTTGGCTACGAC
GCGATCAGCCAGAACACCTTTGTTCCTGATTCAAGGCTCTTCCCTCAGTCATGGGAAGCG
ATTGGTCTAGGTCTGCCACAGCTTGAAGGCATCTCTAGCAACTCGCCTGTCCCGGATGCG
CCTATGCTACATAACGGAACGCTCATTGTAGGCGGTGGCTCGGGATCAAATACACCGCCA
TACATCAGCTCTCCGTTCGAAGCATTAAAAGCGAGAGCATACGATGACGACACTGCCATC
TTCTTCGACTTCGTCTCCACGGATCCGCCAGTTGTCGCAAGCTCGGAAGCATGTTTGGTC
TTCATCAATGAGTACAGTTCCGAAGTCTGGGACCGCCCAGGTATAGCAGATCCAGAGAGC
GATGAACTAGTGCGAAACGTTGCAGCTTCGTGCAACAACACCATAGTGGTCATTCACAAT
GCTGGAATTCGGCTTGTCGACGAATGGATTGAAAATGCAAATGTCACAGCTGTCATCTTT
GCCCATTTGCCAGGTCAAGACGCTGGCAGGGCGATCGCAAAAATACTCTATGGCGACGTT
AGTCCCTCCGGCCGACTACCATATACAGTCGCCAAAAAGCATTCTGACTACGGGCACCTG
CTGGATCCCTGCGAAGCCAATGGCTCCAAGTCTCCGCAATGTGACTTCACCGAGGGAGTC
AACATCGACTACCGCAGTTTTCTTGCGCGTAATACGACCCCAAGATATGATTTCGGATAC
GGTTTGACATATAGTACCTTCAGATATTCCGGCCTCCAGATTGACGTCAATGCCACAGCA
ACACCGAATGACACCGTACCGGCTCCAGTCTATACAAATGGTACAACAAACGATAATTCG
AACCACAGCGGAGTGATTGTAGGCGGGCTTGCTTCGCTATTCGAAAGCGTTGGTACGATC
AAGGCAAGCATTGAAAACACGGGAGATGTGGAAGCGGCAGAAGTAGCGCAACTTTACCTA
CAAATACCGGCGATGGCTAGCAACGCAAGCAACCCAACGACGAAAATGCTTCGAGGGTTT
CAAAAAGTGAGCATTCGGCCGGGCGAGACGGCTGATGTCAGCTTCAACCTCAGGACGAAA
GATGTCAGCTCTTGGGATGTTGTTAGGCAGGCATGGGTAATACCCAACGGCGAGTTTCAA
GTTACTGTCGGCAAAAGCGTGCTGGATCAGTCGCTTACTGGAAGCTTCTCTACATAGCGG
ATCATGAAAACCGTAGCACTTTGATATTCTGAAGACGATGTTGCTGTCCGCATGATTCCA
TCTCCTCATCCACTCTTTCACAAGATCGCTCTATCATTTGCTCGCCACCTTTCTGCCATA
GCGTCTCGCACGCCGCAATTC
>MATOU-v1_1315329
ATCCAAGGACGTCGGAAATTGAGTGCTATCTCTTACATATTCTGCATATACTAGTGAGTG
TCGTATGAGAATATGCTGATCCGGTCAAATCAATCAATCATGCCCTGACCATGCCAATGG
TGAGACTTCTTGTACGTCGTGCCGATGTCTCCCCACCTAACCTCGGAGAACTTCACCGAC
GTATCCGGATTAGTCGCCCTGATGATCTCTGGATTGCCTTCCGTAGCGTTGCATGGACCA
GAGTTACCAGAGTCAAGCCAATTCATGAATTGTCCTGCATCGTTCCAAATTGAGAAAGCC
AACACCATACCACGGCCAATAGCCTCTCCCATTTGCGTAAGACCGCCGAGCTCCCCAAAT
GTTTCGTAATTTGCGTTGCAGTATTCGTCGGTAATGGAATCAACTTTTCGGTTGTTTGAG
GTCACGACAGTATTCTTGATTACCCGACCGTGTTGGACGTACAGTCGACGAATTTCGCTA
AGTGTGCCGGAAGCGGTGCCATCGTCGGTCAAGAACTGAGTTGTAACAGTGAATGGTTTA
GTGGTGTCGACAACATCGTTATAGCCATAATAGTCGCGATCACCTAAAGCATATGGGTTG
AAGCTGCAACCGCTCTTGTCACAGACGCCATTGGGTCCGCACTCATCGCCGGCGCACTCA
TACAGGCTAGAGATATTGCAAGGGTGGGGTGTATAGGACGTGGCTCGAGCATTCGCTTCC
CACAAGTCCATCTCATTGCAGCAAGAGCCCGAACCATTCGTGTTGGCTACACCGTTGATC
CATGCAAGGTTAGGACATTGAGCGTCACAATAGCCAGTCCCATACGTAGCGCCAGCCGGA
TTCAGGTGGCTTCGACCTCCGTCTGCTTCCATTTCGGAAAGGTAAAGGGCGCCGTTTTCT
CCGCAAGGCAAGTCGGATACGTCCACTGTGAAACTGAACTCTTGGTTGAGTAGATGCAGG
AATTGATACTTGTAGCCCGAAGGGTCAAGAAGATACACGCGCGGCGAGACCGATGTCAAG
GAGCCGTCAATGTTGATGTAGTGCTGCAGCTTCATGGTGTCTCCCCAAGTGTAGACGCCG
TGTTGTCCGTAATCGATGCCTTCCAATGCACAGCGCTGGGCACACTCCTCTTCGGTAGGA
CAAATAGAAGGGTCGTAGCTACCGCTTGAGTTCACGCAAGATTCTCCAGTGTAGACGTCT
TTGATGGGGTGGGCGAGAGCGTCGAGTACGACCGATGTGTAATGGTCGACACAGCCATGC
TTTGTGCAAGATTGGGTCTCCAGTCGTGGATGCCTTTCTGGTACTCGTCCGACTTGCTGA
GCAGTACTCAGAGGCAGCAAGCTTAGCGCGCCGAGT
>MATOU-v1_1315948
ACATGGGGACGACCGCGCAGACTATACAGGCACAACAGGCTTTGGAACCGAAGGCCCGAT
AAACGCTGTCGTGAACAAATACATGCCTGTGCATCAGGATACTTGGCTGCCTACCTTCGC
CAACTTGGGTGTTGAACAAAACACAGCCTGGCTCGGGGGTAACAACGTAGGCGCTGCCTA
CCACTCCAGCACCATCGACCCCTCGAATTATACGCGCTCCTACAGCGCCGTCGAGTACCT
CCCCCGGTCAGGCCAAAATATGAAAGTCATGACCAACACCGAGGTTGCCAAGGTCAATCT
GCAGAAGAGAGGCGACAAGTTTGTTGCCACGGGTGTCACTCTAGTCAAAGGTGGCAAGAT
CAATGCCCGCAAAGAAGTCATCCTCTCTGGCGGTACGTTGAAGAGCCCACCAATTCTTGA
GCAGTCGGGCATTGGCGGCTGTTCAATCCTGGAAGACGCCGGAATCGCGCAGCTGATTGA
TCTCCCGGGTGTTGGAGAGAATCTCCAAGATCACCCTCGTATTCAGGCCGCGTACCAACT
AAAGGACAATTATACCTCTTTCGACAGGCTGAAGTACGACAGCGACTACGCCGCGGCACA
GAAGAAGCTTTGGGAGGCTGGAGAGCTTTCGGCTTACGATTACGCTGCCAGCGCTTACTC
CTACCAGCCCTGGCGATCCATCGTTGGGAAGAGAGAGGGCGAACTTGTCGAGGCTGCGAA
GCGTGTCGTAGCAGACTTGGACAACGTCGTCGACAACAAGAAGCTCGAGTGGCTCACGGA
TCCTGTACTTCGTAGCAGCGTCGCCGAAGCAGAGCTACTGCTGTCTGACGGTTACAGTGG
CCTAAAAGGCTATCCGAAAGTGGGCGACCCTCTGTACGGGAAAGGATTCACGACCATCTT
CGCGGCGCTCATGCACCCGCTGGCTCGTGGATACGTGCACGTCAACAGCACAGATCCTGC
AGGCAAACCCATCTACAACCCCGCTTATGCAAGCAACGAATACGACCTTAAAGCGCTTGT
CGAGTTGTCGAAATACATCCGCAGAATTGCTACCACACCACCATTCTCGGACGTCTGGGT
TGATGAATATGAACCTGGACTCGATGTCAACACAGACGAAGAGTGGGAGGCTTTCGTCAA
GAACAATGTCAACACGTTCTACCATCCTGTTGGGACGTGCGCGATGCTGCCGAGAGAAGA
CGGGGGCGTGGTAGACTCGAATCTGACAGTATATGGTACGACGAACTTGAGGGTCGTAGA
TGCAAGTGTGATTCCTGTACTAGTAAGCGCACACCCGCAGACCGGTATCTACGGGATCGC
GGAACGAGCAGCCGAGATGATCTCTGGCCGCTGGTGATAATTGCAAAGGCTGCAACGACG
GTCTGGTACAGTATAGGAGTTTGGTTACAACGTACGCAAATTTCGAGATACATCATTTGt
tttttttATCCTTCTT
>MATOU-v1_1318522
AGGAAGAGCTAATCTAGAATATTGAGGCGTCCAAGGCCGGCATGTATCCAAGTCAGCGAC
GAAATATCAGACAGGCGTCTGGGAACAAGATATAAAGAGGACCAAGTCACCCGTTGTTTC
AAATGGCATCAAGCGGCATCTCTTCCTGGTTCTTTCCCACTACCTTCTTCCTCCCATAAT
TCTGCTACGAAACTTGGTTCAGACATAAGCCAAAATGCGCATCACTCCCGCAGTCGCTCT
TGTAGCGCTTACATCGCCGGCCATTCATGCTGCCCCAGTCCCAAGCCTGTTCGGCGATAT
TGCTGCAGCTCTCCAAGGAGCCGTCGGTACCGTCGTCACGACCATCACCTCGGAGGTACA
GGCGCTCTCTCCGCTCGCTCAGGCGGTCAAGAAGCTAGGTGCTACGCTGCAGACAAACGC
CAATATCCACGGGTCTAAGCTCGGTTGCAACGACCTAGCTATCGATATCATCGAAGGCGT
CGAGGCTGCCATTAGCCACGCTTTCCAGTGGCCCTTCCTGAAGAAGAGTTTCATCGATTG
GAAGACGTACAAGGCCAACGGTGTCAACCTTGGCATCTGGTTCGAACAGGAGCAGAACTA
TGATACTGAATGGTGGGCTGAGAACATCGGCGACTTCCCCGACGAGTGGACCTGGTGTGG
TACTGTCGGATTTGGTGTCTGTGGTCCTAAGCTTGAGGCTCGCTATGCTTCCTGGATCAC
AACGGCCGACATTGATAAGATGGGCAAGCTCGGTATCAACACTCTGCGTATCCCGACCAC
CTACGCTGCATGGGTCAAGGTTCCAGGCAGCCAGCTCTACTCCGGCAACCAACAGAAGTA
CCTTCGTACCATCACCAACTACGCCATTGACAAGTACAACATGCATGTCATTATTGGCCT
ACACTCTCTGCCGGGTGGCATCAACACTCTCTCGATTGGCGAAGCTTTTGGCCACGACGC
CTGGTTCCAGAACAGCACCAACCTCGACTACTCATTCAAGGCCATCGACTCGATCATCTC
GTTCATCAAGAACTCTGGCCGTCCGTATGGTTTCACCATTGCTCCGCTGAACGAGCCCTC
GGACAACTTTGCCGGCTTTGCTACTCCCGCTGGTCTGACCGAAAACGGCACCAACTGGAT
CAACACCTACATCAAGGGCACCCTCGACCGCATTGCCAAGTACGACAAGCGCGTCCCGCT
GATGCTCCAGGATGCGTTCTTCTCCGAAATGTACTGGTCTCCATTCTACCCAGCCGGAAC
GAACCTCGTGATTGACAGCCACATTTATTTCTTCGCTGCTGCCGGCGCATATTCGCAGTA
CGTTGCGCCGGCTATCTGTGGCCAGGCAAAATACATCGGCGAGGGCGACGGCAAATTCCC
TGTCTTTATCGGCGAGTGGTCGCTGCAATCGCTGTACAACAACACCCTCGAGAACCGCAA
GACGCTCTACGATACGCAGGTTTATGCTTACCAGAAGTATGCTTCCGGTGGTGGTAAGTT
CTGGCCTTCCATAGTAATGTCGAGTGAAACCAGCTAACGTATGTGTGCAGCCTTCTGGAA
CTACCGCATGAAGAACAGCGTTGACACCGTTGACGGCGAGGGCGTCCTTCAGGATTACTG
GAGTTGGGAGGGTCTTGCCAACGCTGGTATCCCGTCTGTCAATAAGGTCAACAGCAGCTA
CTGCTAGACCAGTTGTAATAGCATGACGTGACCACGCAGCTTAGCGAGATGAGACCCTTT
TTTAATGTATTTTCTGAAAAGGTTTGTATGATAGACTCAAGAATCAAATCCTGGCCTTCA
ATGGCACCAGCCCAAAGTGGTCCCAGAACTCTCTCCCGAAATAGCATCTGCCGAGCGCTT
CCATACTTCTGGGAAGCGCCCAAACTCTCTCTTCGTCCATAAGCTCATAGACCCATTTGG
CCTGCTCGCTTGGCTCTTCATCATGGACTTCTTCTCCTTGCTGCGCCTTCACGTCTGCCC
AGCCGGACATCAGTGCCCACCAGTCGTACACGAAGCCGTCGGTCAGCATCCACCGCTGTC
CCTTCGCGGTGTCCCATTGCTTCAGCACAGCGAGCACTGCGCGAGCCACGTCGTGTCCAT
GAATCATATGCAGACTCTTCTTGCCCTTGACATCCTCTTTGCTCTTGGCTACACGGCCAA
CCCAGTTCTTCGGTTGCCGCTCTCCACCCCAGAGCCCGGCGAGGTTCAAGACGCAACCTC
CGAGGCGGAGCAGCTCATCTTCGGCGACGGCGCGGGGAGAATCGGTGTTGTAGGGTGAGC
GGCGGGAGACCCAGATGGTCCGTTGTGGGATCTGCCAGATGCCGCTGGAGCCGAACTGGA
TGAAGACGGTGGTGTCGGCTTTGGCGCCGTGTGCGGCTCGGTAACCCTCTACGATCTTCT
TGCTCTGGCCGGTGCCGGTAAGTGGGAAGGTGATGAGGATGGCTGCTGCCAGCGGTAGCC
GGCTGAACTGGTTGGTCGGGTTCGTAGTCGTGGTCGCTTCATCGGGGTTGAAGGACCATG
GGATGGTGTCTGCGCCGGCGACCTTGCGCCCGTCACGTGTTGTCGCCGCGAAAGAGACGT
GGCGGGCCTGACACAGGGGAATGAGGAAGGTCGAGGACCACCCGGCGCCGAGAATGAGGA
GGTCGTGTTGGTGCATCGCGGGAGATTCGTTCGAGTCTTGCCGGGATGGGTGCGCTATGC
TCTATGGCCAGGTGAAGCTGGTAGGACTTGTTTCACGTGAGACGCCGGGAAGTGAGGCCA
CTCTTGTGCTGAATGGGAAAGGTCGTAATGGATTGTAGTTATCTCCCCATAT
>MATOU-v1_1318907
TAGTGGGAAGTAGATCTGTACAAGGTTTCGCGCCGCACTTCCACGAATTGAGTTGAGCGC
TGCGTGCGGAGAGGTACACTATGAGCTCGATAAAGTTGATGGGCTGAGACAACACTAAGC
TTCTAGCCGAATGTCGAATAGCCTCGATAAGAGTCATCTATAGGAGTAGCAGAGACGTCT
CTTACGACAAGCTCATCATACGACTCTGTCAATTACTTTAGATCATGCCTTTCGGAAGCC
CCTTTACGTACTGTCAACAAGACGATAAAGTTGCTAGGTTCCCCCTCATGCTCCTCTCGC
CTTGAAGAAGTCTACAAAGTCGAAGAAACTCTTCTTAAAGGCCCGTTCCTGTGTCGTTCT
GTTCACGGTTTGGATACCAAAGTGTTGATCGTAGTCGCCAAACTCCCAGTTATCAGCGAA
AGACCATGCATATGCTCCAACGACTTCAACTCCATCCTCCCAAATGGCCTTGAGGGTTTC
AGATAAGAAGCTCAAGTAATAGATGCTACGTGGCGTGTCGAAGAGCTCATCTGACAGGTC
TTGCTTATCGGCCTCGCCAAAGACGGGGAACCCAAACTCCGTCAGAGCAACGGGAGCCTT
CCAGGTGTTGTACAAGTAGTTAAGGTACAGGCGCAGATAGGTAGGCGTGATGTAGACATA
CGACTCAGACCGGTATCCAATGTTCCATCCGAAGATGTTGGTGGTAGTCTGGTTGACGCA
GTATGGCCGGTACGGTGACGAGTAGTTGCTCGCGCACTCCATAATGCTCTCCTGAGAGTC
TTCAACCGGTGGTGTGATGACAGTTGCAGTGTACGGATCGATTCCAAGGAAATCTGCTGT
TCCACCAATGTACTCCAGATCCTCCTTTGACAAGGGAACGTAATCATCGATGGTCATCTT
GTATGATTCTGGATAGTCGATTCCAAGGTAGATCGGATTGCAGAACGGACCTAGTTGGAA
AGTGTTGAAGTGATCAGCAGCGTAGACGTCGGCCTCACTCTTCGGGTCACGAGGTACGCC
AAAATTGTTGTTAAACTTCAGCGCAATCTTTCCGGTTCCCTTCAATTCTTCTTTGTAGAA
GTGGTAGACTTCTGCATGGGATTTGATTACATGGTCGATCGATATGCCGTTGTCGGAGTA
CAGCAATGGCTCGTTGTAGGTATACCACACCGGTACGCGATCGGCATAATGGCTCATTAC
GATCTTGGCGTAGTTCACAAATGCTCCCGGGAAGGATTCGTTCTGGTATCCTCCATTGTT
GTAACCAACTGTAGGGGAGTGTCGAAATGCAGAAGAGTGACCTCGGGTCGCATCCCCTTT
TCGATAATGTAGTTGATTACATCGTTGTAGTGGTCTATCGCTTCCTGGTTAACCGGTGTT
CCTGGCAAGGCAAATGGCAAGATCCGAGTCCAAGCAATGCTGAAAGAGAAAGATTTGGTT
CCCATAGCCGCCACACGGTTGATGTCTTGCTTGTAGTTGTAGTAGTGTTCATTGGTCACG
TAGTCTTTCGGCCGGTCGTCTTGGATCAGAATGTCCATCAGTGATGGTGATTTACCCTCT
TCCGCAACAGCTCCTTCAATCTGACTGGCAGAGCTTGCGACGCCCCAATCGAAATCTTCT
GGCCAGTTATAGCAGTCATCAGGTCCAAAGTAGTCGCGCGGAGGCAGGACAAGGCTCTCA
CTAGGCACCGGAGTGGGTTCTACCGTCGTGCTAAACACAGCACTTTTCGTTACCTCTGTA
AAATTCGGCGGGTTTGCCATTTCCCAAAGCGAAGTCCAGGCAGCACGTCCGTACGGATCG
GCAGTGTCCGTGGCCGTAGAATTTGAGCCCGGATCCC
>MATOU-v1_1318908
TTTTTATCGGATAGTCTTGATAAGGGTAGTACATAGGGGTAGCGAAGACGTCTTTCACGA
CAAGCTCATGATGTGAAGACGTGAATCACTTTTGGATCATGTCTTTTGACAATCCCGTTA
TACACTGCCAACAAGACGATGAAGCTGCCAGGTTCCACCTCATGCTCCTCTCGCCTTGAA
GAAGTCCACAAAGTCGAAGAAACTCTTCTTAAAGGCCCGTTCCTGCGTCGTTCGGTTTAC
GGTCTGAATGCCAAAGTGTTGATCGTAATCCCCGAACTCCCAGTTATCAGCGAAAGACCA
TGCGTATGCTCCAACGACTTCAACTCCATCCTCCCAAATGGCCTTGAGGGTTTCAGACAA
AAAGCTCAAGTAATAGATGCTACGTGGCGTATCGAACAGCTCATCTGACAGGTCTTGCTT
ATCGGCCTCGCCAAAGACGGGGAAACCAAATTCTGTCAGAGCAACAGGAGCCTTCCAGGT
GTTGTACAAGTAGTTGAGGTATAGGCGCAGATAGGTGGGCGTGATGTAGACGTACGACTC
CGATCGGTATCCAATGTTCCATCCGAAGATGTTCGTCGTAGTCTGGTTGACGCAGTATGG
TCGATATGGTGACGAGTAGTTGCTCGCGCACTCCATAATGCTCTCCTGAGAGCCTTCAAC
CGGCGGGGTGATGACGGTTGCAGTGTATGGATCGATGCCAAGGAAATCTGCCGTTCCACC
AATGTATTCCAGGTCCTCCTTTGACAAGGGAACGTAATCATCGATTGTCATCTTGTATGA
TTCCGGATAGTCGATGCCTAGGTAAATTGGATTGCAGAATGGACCTAGTTGCAAAGTGTT
GAAGTGATCAGCAGCATAGACATCAGCCTCACTCTTCGGGTCACGAGGTACGCCAAAGTT
GTTGTTGAACTTCAGGGCAATCTTTCCGGTTCCCTTTAATTCTTCTTTGTAGAAGTGGTA
GACTTCTGCATGCGATTTAATCACATGGTCGATCGATTTGCCGTTGTCGGAGTATAGCAG
TGGCTCGTTGTAGGTATACCACACAGGTACGCGATCGGCATAATGAGTCATTACAATTTT
GGCGTAGTTCACAAATGCTCCCGGGAAGGATTCGTTCTGGTATCCTCCATTGTTGTAACC
AATCTCCGCGCCTGACAATGCGGCGGTAACATTGAATCCATAGAACTGTAGAGGAGTGTC
GAAATGTAGGAGAGTAACTTCGGGTCGCATCCCCTTCTCGATGATGTAGTTGATCACATC
GTTGTAATGGTCTATCGCTTCCTGGTTAACCGGTGTTCCTGGCAAGGCAAATGGCAAGAT
CCGAGTCCAAGCAATGCTGAAAGAGAAAGATTTGGTTCCCATAGCCGCCACACGGTTGAT
GTCTTGCTTGTAGTTGTAGTAGTGTTCATTGGTCACGTAGTCTTTCGGCCGGTCGTCTTG
GATCAGAATGTCCATCAGTGATGGTGATTTACCCTCTTCCGCAACAGCTCCTTCAATCTG
ACTGGCAGAGCTTGCGACGCCCCAATCGAAATCTTCTGGCCAGTTATAGCAGTCATCAGG
TCCAAAGTAGTCGCGCGGAGGCAGGACAAGGCTCTCACTAGGCACCGGAGTGGGTTCTAC
CGTCGTGCTAAACACAGCACTTTTCGTTACCTCTGTAAAATTCGGCGGGTTTGCCATTTC
CCAAAGCGAAGTCCAGGCAGCACGTCCGTACGGATCGGCAGTGTCCGTGGCCGTAGAATT
TGAGCCCGGATCCC
>MATOU-v1_1318909
TAGTGGGAAGTAGATCTGTACAAGGTTTCGCGCCGCACTTCCACGAATTGAGTTGAGCGC
TGCGTGCGGAGAGGTACACTATGAGCTCGATAAAGTTGATGGGCTGAGACAACACTAAGC
TTCTAGCCGAATGTCGAATAGCCTCGATAAGAGTCATCTATAGGAGTAGCAGAGACGTCT
CTTACGACAAGCTCATCATACGACTCTGTCAATTACTTTAGATCATGCCTTTCGGAAGCC
CCTTTACGTACTGTCAACAAGACGATAAAGTTGCTAGGTTCCCCCTCATGCTCCTCTCGC
CTTGAAGAAGTCTACAAAGTCGAAGAAACTCTTCTTAAAGGCCCGTTCCTGTGTCGTTCT
GTTCACGGTTTGGATACCAAAGTGTTGATCGTAGTCGCCAAACTCCCAGTTATCAGCGAA
AGACCATGCATATGCTCCAACGACTTCAACTCCATCCTCCCAAATGGCCTTGAGGGTTTC
AGATAAGAAGCTCAAGTAATAGATGCTACGTGGCGTGTCGAAGAGCTCATCTGACAGGTC
TTGCTTATCGGCCTCGCCAAAGACGGGGAACCCAAACTCCGTCAGAGCAACGGGAGCCTT
CCAGGTGTTGTACAAGTAGTTAAGGTACAGGCGCAGATAGGTAGGCGTGATGTAGACATA
CGACTCAGACCGGTATCCAATGTTCCATCCGAAGATGTTGGTGGTAGTCTGGTTGACGCA
GTATGGCCGATACGGTGACGAGTAGTTGCTCGCGCACTCCATAATACTTCCCTGAGAGTC
TTGGACCGGCGGTGTGATGACGGTTGCAGTGTATGGATCGATTCCAAGGAAGTCTGCTGT
TCCACCAATGTACTCTAGGTCCTCCTTTGACAAGGGAACGTAATCATCGATAGTCATCTT
GTATGATTCTGGGTAGTCGATTCCAAGGTAAATCGGATTGCAGAACGGACCTAGTTGGAA
AGTGTTGAAGTGATCAGCAGCATAGACATCAGCCTCACTCTTTGGGTCACGAGGTACGCC
AAAGTTGTTGTTAAACTTCAGCGCAATCTTTCCGGTTCCCTTCAATTCTTCTTTGTAAAA
ATGATAGACTTCTGCATGGGATTTTATTACATGGTCGATCGATTTGCCGTTGTCGGAGTA
TAGCAATGGCTCGTTGTAGGTATACCACACCGGTACGCGATCGGCATAATGGCTCATTAC
GATTTTGGCGTAGTTTACGAATGCTCCCGGGAAGGATTCGTTCTGGTATCCTCCATTGTT
GTAACCAATCTCCGCACCTGACAATGCGGCGGTAACATTGAATCCATAGAACTGTAGAGG
AGTGTCAAAGTGCAGGAGAGTAACCTCGGGTCGCATGCCCTTTTCGATAATGTAGTTGAT
TACGTCGTTGTAATGGTCTATCGCTTTCTGGTTAACCGGTGTTCCTGGCAAGGCAAATGG
CAAGATCCGAGTCCAAGCAATGCTGAAGGAGAAAGATTTGGTTCCCATAGCCGCCACACG
GTTGATATCCTGCTTGTAGTTGTAATAGTGTTCGTTGGTCACGTAGTCTTTTGGCCGGTC
GTCCTGAATCAGAATGTCCATCAGTGATGGTGATTTACCTTCTTCCGCGACAGCTCCTTC
AATCTGACTCGCAGAGCTTGCGACGCCCCAATCGAAATCCTCTGGCCAGTCATAGCAGTC
ATCAGGTCCAAAGTAGTCGCGGGGAGGCAGGATGAGGCTCTCACTAGGCACCGGAGTGGG
TTCCACCGTCGTGCTAAACACGGCACTTTTGGTCACCTCCGTAAAGTTTGGCGGATTTGC
CATTTCCCAGAGAGAAGTCCAGGCAGCACGTCCATACGGATCGGCAGTATCCGTGGCCGT
AGCATTTGAGCTGGGATCCCATTTCCCCCAAGTCGTATATGAGAGGGAAGATAGTTTCGA
GGTCAGTTGCTCCGGCGGGGCAGCGAATGTAGTAGTCGTAGTTGGTGATGGGCGTGGTGT
GGCGTAGCGATAAGTTGATGTGAGGCTGTACTCAAACGGGTGGAATGTGTATTGCGGGTG
GCCACCAGTGCAGGAGGGGCAATTTGGACGTGGAGTCGATCCATTCGTCTCTACATAGAC
CTGCTGAGCGGCCGCCAGCGAGGCCATAAACACAAGTTGGCCCAACATCGTGACTTTGAG
GACAGCGATTATCGGATGTGGAACGAAAGCGTTCCCCATGT
>MATOU-v1_1321251
AGTATCCCTCAGGACAGCACTCGTCATTCGCCATGCCGATGCTCAAGGACCCAAGCAAGA
AGTATAAACGCTTCCAGCCGCTTCACCTTCCGGACCGACAATGGCCTTCCAAGGTGGTGG
ACAAGGTCCCTCGCTGGCTGGCCACTGACCTCCGTGATGGCAACCAATCCCTCGTAGACC
CCATGGACGGAGATCAGAAATGGCGATACTTCCAGATGCTCGTCAAGCTAGGCTACAAGG
AGATCGAAATTGCCTTCCCCAGCAGCGGAGGCACGGACTACGATTTCACAAGGCGTCTGG
TGACAACTCCAGGCGTGGTACCGGACGACGTCTGGCTGCAGGTCCTCAGCCCGTGCCGGA
AGGATCTGGCTGCAGGTCCTCAGCCCGTGCCGGAAGGAGCTGATCAAGCCAACCGTGGAG
AGTCTGAGGGGGAGTAAGAAGGCTATCCTTCATCTTTACCTAGCGACAAGCCCTTGCTTC
CAGCAGATTGTCTTCAACATGACCAACGAGCAGAGCAAGGCTTTGGCAGTAGAGTGCACT
AAATACGCTCGTTCTATTACGAAGGACGCCCCCGACAATGGCGGCGTGGAAGAATGGGCT
TACGAGTTCAGCCCTGAGACCTTTTCCGACTCGAGCCCAGAATTTGTAGTCGAGGTTTGC
GAAGCCGTCAAGGAAGCCTGGGGACCAACCAAGGAGAACCCGATCATCTTCAACTTGCCT
GCGACTGTGGAGATGAGCACGCCGAACGTCTACGCCGACCAGATCGAATACTTCTGCCGC
AATATCAGCGAGCGCGAGAAGATTTGTGTCTCACTGCACCCACACAACGATCGGGGTTGC
GCGGTAGCCGCCGCTGAGCTTGCACAGATGGCTGGTGCCGACAGAGTAGAGGGTACGCTT
TTTGGCAATGGCGAAAGGACAGGCAACGTTGATTTGGTCACTCTGGGTCTCAACTTGTAC
ACACAAGGCATCCATCCAGGCATTGACTTCTCAGACCTCAATTCCGTCATTGACATAGTG
GAGAAGAGCAACAAGATTCCGGTGCACCCACGACAACCGTACGGTGGCCAACTGGTCGTC
TGTGCTTTCTCCGGGTCTCACCAAGACGCCATCAAGAAGGGCTTTGTAGCACGCGAGGCT
GCCGGACTTTCGAAAGAGGATGCTTGGACTATGCCTTACCTCCCTCTGGATCCGGAAGAC
ATCGGGCGTACGTACGAAGCTATCATCAGAGTCAACTCGCAATCCGGCAAAGGCGGTGTG
GCTTGGATCATTAAACGCACCTTGGAGCTCGATCTGCCCCGAGGTCTCCAGGTTGCGTTC
TCCAAGATCGTGCAGCGAGAGACTGACATGCTCGGTCGTGAGCTCCTGCCCAACGAGATC
AAGGATCTCTTTGTTGACGCATACCATTTGAACCGCAACCCGAGGTTCAGCTTGGTCGAT
TACAACATTTCAGCCGACCGATCAGCGTCTCCCGCCCCACCACAAGAAGGCAAAACAGCT
TCTTCCCGCAACCTTCGCCGAAAGTTCGACGGCATCATCGAAATCGACGGTGCCGAGCAC
CGCATCTCAGGCACCGGAAACGGCGCTCTTTCAGCCCTGGCAAATGCGCTCAAGACGCTC
GGTATCGACCTTGACATCTCGGATTACAAAGAACACGCTATCGAACGCAAGGGCGCTGAG
GCAAAAGGTCGCGACGTGCAAGCCGCAACTTTCATCGAGTGCACGGCTTCTGGCCAAGCA
CAGAAAGTGTGGGGTGTTGGCATCCACGAAGATGTTGTTCAATCGTCTCTCTTTGCGCTA
TTGTCCGCGGCATCTTCCTTCCTAAGCTCGAGACCAAGCACACCAGTGCCGTTTAAGCCT
AAGAAGTCGGACGCACAGTCCCTGGACGTCCCTGGCTCGAGTGTCAGCCAGTTGGCAAAG
GAGATGAACGGCGCACCTGCGTCTGCACCCGATGCGGTGGAAAAGCTTGAGGCCGCAGTG
CAGCAGCAGGAGTCCATGCCACAGGTTGAGGGCGGCGCAAATGGAAAAGCGACTTAAGTA
CAGATGGTCAAGCTATGTTGAGATGTTCTGGCGTGGATGATACCTAAAAGTACGCTGGAT
TTGTTTGCGAGCGGCATAAATCCAGCATCATATGAGACAGTAAGCTGATTCGACTTGAAT
GCAATTGTACAATGTCTTTGACACCTTCACATGACTTGGTCAGTTCTCCTCATCTTGCAA
TCTTTTGTACCCAATCGCTCCTTATGGTGCTCCCAGGAACGTCCAATCGAGATCCTTGCT
GTCCATACCCATTCCTCTCACCTCGATAGTCTGTTCATCACCGGGCACAACGTCTACCGC
ACTGTCCGTCACTAGTACTCCCTCTCGCTCTTCGAAGACGAGTCCCTTGGTCGGCTTCCT
AGCCCTCACAGTAATTGTGCCATTGTCAGACTCCACGCTCACACCCCGCTCGCTAAAGTC
GAGATACTTCAATGGCTGCGGCCAGTCGCAGTCGCGAGACACCAGCTCCTGGTCTACCCA
GATGCGTGCTGAAAGGACGTGAGGCTCTTCTCGCTCATTGTCAATGACACCCTGAAACAG
CTCTGTGGTGCCGTTGGGTACGATGCGGACATCTTCCAGAACCACTTTGTCTTTGATTTC
ATGACCAGTAGCAATACTGATGTAGCGTAGCTCAACCGATGCAGTAATCTCCTCCAGCTT
ACTGCTTGCAACCCAGCACTCATACTTCGACTGCTTTGCGGGCCTAGCATGTACCACGCT
CCAATCATGATGCTCTCTCCTCACCGCGATGGCCACCGGCGCAAGCGCCCGACGCATGAC
ATAGTAGGCCGGCTTCTTACGTTGGAAGTAATCGACAATAGCCCAAGAAGTGACCGGCCA
ACAGTCATTGAGCTGCCAGACTAAGGCACCTCCGCAGAGCCGCTGCTGACCCCACTGACG
TCGCCACCCCCTATATGCAAACATCAATGCCTCGGCTTGACTCAATTGCGTGAGATGTAT
GAATTTGTCAAGCTCTGTCCTAGTCCGGAAGTTCTCGACAAGATACGTCGCTATGCGGCG
TTCATGTCCGTCCGCTTTGTTGTGAAAGTCGATCATGTG
>MATOU-v1_1322803
ATTATAGAACACATTATATTAGTGTGTAGCGTTGCTATTCTACGCTATCTAATATGCTGA
TGATAAGAAATTGGGATGATCGATACTCCCATCCTGATTTTAGAAAAAGGCAAAATCAGA
TCAAATTTCCGACCCATTAAGTGCTGCCGCCGAGGCAGTCCGAAACACACTCAGCCTTTT
AGATCCGAAAATCGATCAGGGCGCTGTTGAATGCCCGGGAGAGAAAACCCAAGACGCCTC
GCTCGAATTGCAGCAATAAGAGAGCAAAAATTAGGGGTTGTCACCCTTACGCGCCAGCAT
CGATCTGGTCGACGACGTTCTGGCTGCTGTAATAGTCCCAGTCCTTGCAGGTTTCCTTGG
TGAAGCCCTCAGGAAGCGTGGGAATGTCGTCGGGCCTGTACAAGATGTTGATGGACTGGC
CACCGCTCAAGTGCCACGCGACGTGACAGTGGAAAGGCCAGATGCCGGGGTTGTCCAGCT
CGAATTGGATCGCTGCGTAACCGTAAGGCGGAAGTAGAATGGTGTCCCTTCTCATTGGGT
TTTCGAAGTTCTTGACGCCGCCGTCCCAGGCCAGGCCTTGTTCGAAGCCGGGTCCGTTGT
TAGGTCCAGGGCGCTGTGCCTGTGCTGGCCCAGAGCCTTCTTGAACATCCAAGACGTAAA
AGTTGTGGCCGTGAAGGTGGAAGGGATGGGTGAGCGGCATGTTGTTCGTCACGTTCAAGA
TGACGCTGGTGGTGCCAGGACCACCCAAATTGTCGTAGACGTTCCACTGCGGTTCGAAGG
TGAAGTTGCCTTCTTGGACATTCTTCAAGAGTGGCTTGTTGAAGTTGGCGTGATAGACCT
GTCCGTTGACACGGAATTCGAAGTTACCAGTCTCGTTCCTGACAAGAGTGAGGTCGAGGT
CTTGCAAGTAGGTGTTGTTGCTGGGCGTGATGGCGTAAGCAGGCGTGACATCAGCGAAGT
CGGCATTCAAGCAAGCAGATGCATTGTATGAATGTGTCGATTCGCTCTTTGGGTCGACAG
TAATGTCAGCGTTCTCGTAATAGATCGCCGCCTTCATGTCCGGGTTGTCAGAACCACCGC
AAGGCTCACCGCCGGGTGCCGAGGTGCGCATCCAAATTGCCGCCTCAGGCGTGTCGAGGG
CAGTGACAAGGACATCAGCGCGCTGACCCACGCCCAGTGTTACGACATCGGTAGTGTAAG
GCACGACCGGGACGTAGTCCGTTGCGATGACAGTGAGGTTGTGGTTGTCAATTGAGAACT
TGTGGACGCCATTGGCGCCGTGGTTCATCAGGCGAAGGCGATGGACTTTACCCGACTGGA
AGCGGAAAGCAGCAAGTGGTGCCTCGTCAACGCAAGTCCACTCAAGGTCCGACTCAAGGT
TGCTGCCAAGCCACTGGGAAGCATTGTCGTAGGATCGCTTGGAGCAATCGAATCGGCCAC
GGCCGTTGATCAGGACGGCATCACTGGTCGGTGGGATGACGGAAAGGTCGGTGCCAACAG
CGTTCTCGACAATGCTGAAGTAAGGAATGTGATACCAGTCACTCAGCATCACGGGACCGA
TGTCGATATCGTAATCCATCGAAGTGGGACCGTGAACAACAAGAGGACCGGCAACACCAG
CAGTGAATTGGGAGCTGTAGTGGGCATGGTACCAGCTGCTGCCGTGTACTTCTGCCAGGA
AGTCGTACGTGAAGCTGTGGCCTGGAGCGATCGGGCATTGACCAATGGATGGAACACCGT
CTTGCCAGGGTGTCAACCTCTGGAGCTGGCCATGCCAGTGTAGAGAGGTGCCCTCCTGTG
GTTCGGTGATGTTGTTGTGAACTGTGACTTCGATACGGTCGCCCCAGTTGGCTTCGATCA
TTGGTCCAGGGAATTGATTGTTGATCAAGATCACGTCACGAAGAACGCCATCGGCTGAGA
TACGACCACGGGAGATCGTGAAGTCGTAAGCCCGAGTGACATTGGTGACAGGGACGTCAC
CCTGCACCGTCGAATCCGAGTTGCTTGTCGTAAGGTCTCCCCAGGGTGCGGTCTCATAGT
CACCGAGCCACTTGTCCAGATAGGGTGCGCATAGAGAGCCAAGCACCGAGTCG
>MATOU-v1_1323991
CGAGCATTGGCTGACTTTCAATAGTGGACCTTTTACTCGCTGACACCGAGGACGAAGGAG
ATCAGTCTGGACACGGCATTAGTCCGAAGCAAGTGGCATGAACGACTGCGAGTCGACGAC
ACAATTCTCGAATTAAATGTGTGCTGACTTGTAATAGGGAGTCTATTCCTCCGCCAGGCG
AAGACGAGTAGTGAGCCAGCCGGGTTGGTCATGGATTGGCCGAGTTGATTGGCAACGGCA
GCTTGAAGGATCATTTCGCGATCTTTGCACAATTAGTGTTGGTTGCGTAGAGGCGATTGC
TTTGGTGCCTGCGCTTCGACAGCGACTGAAATGTTCAGCTCTTACATGAGCTCGTCAAAA
GCGTGTTCATATGGCTATGAAAGTAACAGCATTGCACTTTGGGAATTCTAATCGTTCTCA
CGGTGTCTGAAACTCCCTTGCCGTGCGATTCGAATGCAGTATTCCATGCTCTGGTGCATT
CTTGATAATTCTTCCAAAATCGTGGAGCAGGTCCGGGTCGAAGCACAAGCATGAGCCTAT
TGAACGTCGGTCTGATCCGGAGGAATCGTAGAGCACATTTGAGAAACACGGAGCACAAAG
TACAGCATAAGGTAGATTAACTTCGAGGGAATTGCTTCGCTCGCAGCTGCTTCGTGAAGC
GCGGTGTATAGTTTTGAAGGTTCTTAGTCGGCTTAAACAAGGGACTGCTCACAGGAACAA
CTTCAAAAGGCTCAGGCCTCATGAATGGGATTGCTGATAGTCGATAAATCCGGCTCCTTC
TCCGTCTCTATCAAGCAGATACCCAAACCGACTCTCGTTCTGCAGAATGTAGTACGGCAC
GTCCATCAGGCCCTCTCCGACTTTTTCCACTCTTTCGTAGACCTCGTCAGGTCTTCCAAA
CAAATCTTTGCCATTCCTCACCCTTTCCACAATCGTGTCAGGGTCCCTGTTTTTCGGTGT
GTTCCAAGGCGTGTGTGAGAAGGATTCCATCTTGGTTTGCATTGCCTTTATAGTGGCAAA
GCAAGATGAGCAATGCCAGGCAGCATCCCATAAATCCGCCTTGTCCCACCAGGCCCGCAA
ATGATTAATGAAGAACCAGCCATGAGTGCCGGCCTCGCCGTTCCGCAGGTCTTTAGGTAA
AATGGTATTCTGAAGGCCGCGGTAAGAGGTTGCCTGCGGGTGCGCCCACTGCTCGCCTTT
GTGCGACCATTGAAAAGAATAGTAATAGAAGTGACTCCGCAGTGTCAAGCGGTCAGGGAA
TTCGCATTTCCTGAGCACGAAAAGCGTCTCCGGCTTGGGCACTTCGTCAATGTCGCTCAC
GACAAGCACATCTCCCTCGTTGGCCTGTTTTGGCGTTCCTACTAGATCCGGAAAGACCTT
GTCGAAAAGAGCGTTGCGGAAGAAGTCCTCATGATCCCAGGTCCGTCCACCGACCACTTC
GGATCCGGGATCCTCTACGACGCGGTGTATGATCTTCCTGTGGAATGGCTTGAACTTGTC
CCAGTTTTCCTCGAGGTACGCCGGCTTTTTGAGACCGGTGAACGTGGTTCTTGACTCGAC
AATTACGAAGAAATCGACGTAGGGGCTGAGCGTATGTAGCCGGATCTCAAGCCAGTCAAG
TTCCGAGCTCAGCAAGAACAGATCGTACACTTTGCGCCCACCAGTAGTTTCCTTGAACGG
AGTAAAGCCGTGGGTGGCGCAGAATCCTGGGATTTTATCGGGCAAAAGAAGATGCTCTGA
AGGGCCCAAGGTCTGTTCCTTGTGCAGATTGGGATGTAACAAATGCACAGTGTTTCGGCG
TCTGTAGATGGACGGCGCGATGAAGGCCGACACAATCAGCAGCAAGACTATTACCAGTCG
TACGGTCCTGAAACGCGGCAGGAGCATATTTGCGGCCACTGCAGATCCGACGACGCGGCG
GCGGATGGCGATCTGCAGGCGGTCCACCTGTCAATCTGCGTCATGCAGATGTCATGAA
>MATOU-v1_1324478
ACATGGGGAGCACTCGCTCAGGTTATCTCCCCCGGGAAAACTTTGTACACGATGGCCAGG
TCAAAGACCCCGCAGGAGTTCTTCACCGACTTCATGATGGGTGGTGTCTCCGCCGCCGTC
GCCAAGACGGCTGCGGCCCCCATCGAGCGTATCAAGCTCCTGGTTCAGAACCAGGGCGAG
ATGCTCAAGTCGGGTCGTCTCGCTACCCCCTACAAGGGTATCGCGGACTGCGCTGCCCGT
ACCTACGCCGACGAGGGTCTCGTTTCCTTCTGGCGTGGTAACACGGCCAACGTCATCCGT
TACTTCCCGACTCAGGCCCTGAACTTCGCCTTCAAGGACTACTACAAGTCGCTCTTCTCG
TTCGACCAGAAGCGTGACGGTTACGTCAAGTGGATGGCCGGTAACCTCGCCTCGGGTGGT
GCTGCCGGTGCCACCTCGCTCCTCTTCGTCTACTCGCTCGACTACGCCCGTACCCGTCTC
GCTGCCGACAACAAGGGCACCGCCAAGGGTGGTGAGCGCCAGTTCAACGGCCTCGTCGAC
GTCTACAAGAAGACCCTCGCCTCGGACGGCATTGCCGGTCTCTACCGTGGCTTCATCCCG
TCGGTCGTCGGCATCATCGTCTACCGCGGTCTGTACTTCGGTATGTACGACTCGCTCAAG
CCGGTCGTCATGACTGGCCCGCTCCAGGGCTCGTTCCTCGCCTCGTTCCTCCTCGGATGG
GGTGTCACCACCGGTGCCGGTATCGCCTCGTACCCGCTCGACACCATCCGTCGTCGCATG
ATGATGACCTCGGGCGAGAAGGTCCACTACTCGTCGATGATGGACGCTGGTCGCCAGATC
GTCAAGGCCGAGGGTGTCTCCTCGCTCTTCAAGGGTGCTGGTGCGAACATCCTCCGTGGT
GTCGCCGGTGCCGGTGTCCTGTCGATGTACGACAAGCTGCAGGAGCTTGTCTTCGGCAAG
GTCTACTCGGGCGGCTCGGGCTAAACAGCTACTTCCCTCCCCACTACCTTTCCTCCTTTC
GCATTGTTTCTCTTCCCCCTTACTACACGCTTCCCTCCCATGCTGTTATGCCCCTCCCGC
TTTCTCCCGAGTATCTGGGTCCTCCGTCCCGCTTGCAACGCGGACAACGAAAAGAGTTGC
CTTCC
>MATOU-v1_1324479
ACATGGGGAGCACTCGCTCAGGTTATCTCCCCCGGGAAAACTTTGTACACGATGGCCAGG
TCAAAGACCCCGCAGGAGTTCTTCACCGACTTCATGATGGGTGGTGTCTCCGCCGCCGTC
GCCAAGACGGCTGCGGCCCCCATCGAGCGTATCAAGCTCCTGGTTCAGAACCAGGGCGAG
ATGCTCAAGTCGGGTCGTCTCGCTACCCCCTACAAGGGTATCGCGGACTGCGCTGCCCGT
ACCTACGCCGACGAGGGTCTCGTTTCCTTCTGGCGTGGTAACACGGCCAACGTCATCCGT
TACTTCCCGACTCAGGCCCTGAACTTCGCCTTCAAGGACTACTACAAGTCGCTCTTCTCG
TTCGACCAGAAGCGTGACGGTTACGTCAAGTGGATGGCCGGTAACCTCGCCTCGGGTGGT
GCTGCCGGTGCCACCTCGCTCCTCTTCGTCTACTCGCTCGACTACGCCCGTACCCGTCTC
GCTGCCGACAACAAGGGCACCGCCAAGGGTGGTGAGCGCCAGTTCAACGGCCTCGTCGAC
GTCTACAAGAAGACCCTCGCCTCGGACGGCATTGCCGGTCTCTACCGTGGCTTCATCCCG
TCGGTCGTCGGCATCATCGTCTACCGCGGTCTGTACTTCGGTATGTACGACTCGCTCAAG
CCGGTCGTCATGACTGGCCCGCTCCAGGGCTCGTTCCTCGCCTCGTTCCTCCTCGGATGG
GGTGTCACCACCGGTGCCGGTATCGCCTCGTACCCGCTCGACACCATCCGTCGTCGCATG
ATGATGACCTCGGGCGAGAAGGTCCACTACTCGTCGATGATGGACGCCGGTCGCCAGATC
ATCAAGGCCGAGGGTATCTCGTCGCTCTTCAAGGGTGCGGGTGCCAATATTCTGAGAGGA
GTTGCGGGAGCCGGTGTGCTCTCGATGTACGACAAGTTGCAGGAGCTCGTCTTCGGCAAG
GTCTACGCCGGCGGCTCGGGCTAAACAGCTCTTCCGCATCCCTTCTATACTACCCCTTTC
GCATTTGTTTACCAACCCTCTCTCATGCTGTTATGCCCTTCCCTGCCCGTCCGGTTTTCG
CTTTGTCCTTCCAGACGAAAAGAACAG
>MATOU-v1_1325430
CCGTTCTCGCGGCGACTGACGATACCCTCGTTCCACAGGGCCCAGTGGTTGCTCGGGTGG
AAAGTCAAGTTGTTACCCTCCGTGCCCATGTTGATGTAGTAATGCAAATTTCCATCGCTG
TCAGGCAGGCTGAAGAACCCACTGACTTCGAAGTTGAAACCGTACGTAGCCGTAGAGATG
ATCGGGCCGAGAGAAGTGTTGGCGGCAGGCTCCCACAGCGCTCCCTGGAACGTCCAATCC
GTGAGGTCACTGGCTGGCGCACTCCAGAGCGGCATTCGTGGTCCGACACCTTTGATGCCG
GAGCCAAAGACAGCGTAATAATGCGGTTCGTGCATACCAAGAATCTGATCCATCGCTGGC
CAAGGCTCGAAGAACGGATCACGGAAGCCTGTGACGTTCCAGTTCATAGGCGGCAAGTTC
GTCGTCGTGTTGATGATCGGGTTGCCCTCGTACTCTTCCCAGGTCTTACCGCCATCGGTA
GAGTATGCAAGCGACTGTGTCTCTGTGAAGGGTTGATATTCAATCTGCCAATTCGTTGGC
AGGTGGGCGACAGAGGTGTAGAACAGGAGCAAGGTCCCGTCTTCCTCGCCCTGCATGTTC
ACTGGCTGACCAGTGCCCGAGAATATCCCCAGACCGTTGTAGTTCCCGTAGCCAGTCGGT
CCTAATGCGAGAGCTTCGCTATCTTCCCAGCCGTTATAGTCCTCCCAAGTGATCATGTCC
TTACTTGTGGCGTAACCCCAGCTGATGTTTCCCCAGTTGATGTGTTGAGGATGCCACTGA
TAGAAGAGGTGGTAGACGTCCCGTTTAGGATCGTACATCGGGGCGCAAGGGTCGTTCATC
CATCCGGCTGGTGCCATGAAGTGGGAGTGTGGACGCCACCGGGTGAAGAGAGTGTTGTTC
CCAGCACTCTCGATGTCTTCCGACGTAATCATACTACATGATTGCGAACCACTATCACTG
CTACTCGTGCTGGAAGCGCTGCCAGAGGTTGCAGTGGAAGAGCTGCCCCAGCGGTGGCCG
GACCATGTCTTCGTGCCCTGACGGGGGCCTCCTCGAGGCGGACCGTAGTGATGCTGGGCC
AGGCCAAATGGCACTGAGCCCAGGAGAGCAGCATACGTAAGACCTCTCATGTTGCAAGCC
AAGAGGAAGATATCTGTATGCTGATGTGGATAATTGACAAGTTGTGATCGA
>MATOU-v1_1325823
ACATACAGCCGAGTGTGCTTGTACATGGTCTCGATGGTCCCGCTACTTACATACCCTGAC
AACGATCGATTCGTTCGGACAGCTCACGACATTTACGTTCACTACAAGCAGCTCACTCAG
GCTATGTCTCTCGCCATCAAGCTCAACGACATGGATCTGATCAAGGCAGATTTCGCTGCG
ACGAAGGACAAGGCGCTGAAGAGGCAGCTTGCTTTTATCCTCGGCAGGCAACGGATTTGC
TTAGATCTTGAAGGCGAGGATGCAGAAGACCCCGGATTTGCTTAGATCTTGAAGGCGAGG
ATGCAGAAGACCCCGAGCTGCAGGATTGCATCAACAACACCAAGCTTCCTGAGCACTTCA
AGGCATTGGCCAAGGAACTCAACATCTTGGACCCCAAGGTGCCGGAGGACATTTACAAGT
CGCATCTGGAATCCTCGCGGACAGCTGGCATGACAAACACCGATTCGGCCCGCCACAATC
TTGCCTCTGCGTTCGTCAACGCCTTCGTGAATGCAGGATTTGGTGAGGACAAGCTTATGT
TGGTCGAGGGAGGAGTCAAACAGAGCTGGATCTGGAAGGTGAAAGAGGATGGCATGATCT
CGACAGCAGCTTCTGCTGGTATGCTGATGCTGTGGGACGTCGAGATGGGTCTGGACAAGA
TGGACGCATACACATACGTGCCAGAAGATCAGATCAAGGCAGGCGCGGCGCTTGGCATGG
GTGTCATGAACAGCGGCGTGCGCTTGGACAGCGATCCTACCATGGCTTTGCTTGGCGATC
TGGAGGGCAAGTCGGTCGCTCATAAGATGGCCTCCATTATGGGGCTGGGTCTCGCATATG
CTGGTTCCCAGAAGGAAGACTTGCTTGAGCTCCTTCTGCCTTACGTCTCTGATACGTCTG
TCGACATGCAACTATCTGCTATGGCTGCGTTGTCTTTGGGTCTGATCTTTGTGGGCAGCG
CTCAGTCAGATGTCTCGGAGGCAATCATCCAGACTTTCCTCGACGAAGACCGCACCAACC
AGCTCAAGGACAAGTGGACGCGCTTCATGACTCTTGGGTTGGCCCTGCTCTTCTTCGGCC
AGCAAGAGGAGGTTGACGTAGTGCTTGAGACACTCAAGGCCATCGACCATCCTATGTCGA
AGCCCGCCTCAGTGCTCGCCGAGATCTGTGCTTGGACCGGCACTGGTGCTGTGCTCAAGT
TGCAGCAGCTTCTGCATATTTGCAATGAGCACATTGAGGAGAAGGAAGAGAAGGAGGATG
ACGACAAGAAAGATGAAGGCGAGGAGAAGCGCGATCTCTCTGGTGACATGTTGGTCCAGG
CCTACGCCGTCATTGGTTTGTCGTTGGTGGCTATGGGAGAAGAGGTTGGCCAGGATATGG
TCCTGAGACAGTTTGGCCACCTGATGCATTACGGCGAGGCGAACATCCGCAAGGCCGTGC
CGCTAGCAATGGGTCTGATCTCTCCTTCCAACCCGCAAATGAAGGTATACGACACTCTGT
CGCGATACTCGCACGACAATGACATTGACGTCGCCGTAAACGCCATTTTCGCCATGGGTA
TTCTCGGTGCCGGCACGAACAACGCTCGTCTTGCGCAGCTGCTGAGGCAGCTTGCGTCTT
ATTACCACCGCGATGCAAATGCCTTGTTCATGGTCAGGATAGCACAAGGACTTCTGCACA
TGGGCAAGGGCACCATGTCAATCAA
>MATOU-v1_1327313
GCCTTGTAACAAGGTCGAGTACTCGGCCACGGCAGGGCTGATGACGGGTGAGGAGATGCC
GCCTGCCAGCTCGCCGATCGCCTTCATGCCCGGCACGAATTCTGCAAGCTGTGAATGCAT
GTTGTATAGGCAGACCGTTCCCACGAGGGAGCCGTCCTGCGGTCGCTTGGCGCGTATGAT
GCCGCACGCTGATGGATCCGCCAGCGCCATCTTGTAGACCTCTGCAAGCCCTTGGCGATT
GTTCGTTTTGATGTGGTCTAAGACCGGAGTCGCGTAGTCCCAGCCGTAGACGAGATCGAA
GTCCGCACCGGCGCTTTGCAGGCTCTTGGCCATCCCTGGAGGCGGTGTCCATGTAGACAG
GTTACGAGCGACCATACTGCAGACCGAACGGGATAATGCAGTGTTCCAGCCCAGATTGGC
AAACCAAGACCGTAGTCTTTTCCGCTCCCCTCCATGGCTCGTCGGTATCCCTAGATATAT
ACTAGGCAGCCTAGAACCCAATTGAAATCGTTTGATGCCGTCGCGTTGGAGCAGCGTGCG
GATGGCGCGGTTGTGAAGGGAATGGCCGATAGAAAGCTTTCGCCGGCTGGGATCAACAAA
AATAGCGCCAATGACTCCTGTTCCAGTAGCCTTGAAGAAATAAGTCGAGCAGAAGCCATA
TACGGCCTGTGTGCTGCTGTTCCGAACGACAAAATGTGCTTCAAGTATGTCTGGGTTACG
GAGGAGGAAGCTATTGGACGACGCGCTGGACAGCTCCGATTTGAAGCCAGGAGTGTGACC
GTCGGCCGTAGTTTTAATGAGGACATCGAGCGCATGCGAATCACGCTCTTCGTTGAACGT
TTCCACCAGCCAATGCTGCTTGCTTTGACTTAGCTTCTGACTCTGGCTGATTGATCCGGG
AAGTGCGCCTGCTGGTGTAAGGTCTCCGTACAGCACCTTTACCAGAGAAGTCAAAGCCGT
CTCGGTAAAGTCGTACGTGCAGATGTATGTCCCGATGCTCTGATCCATCGCGAAGTCGTA
TGGGGAGCTGACGGCAATGACAATCACAGGCTTTTCCCTCTTCTCTCCGCCTGAGGTATA
TTGCATATTGCAAATCATCGATACGTGCTTTGTGAAGCCGTTTTGATACAAATTGCGATT
GGCATCTGCCGTAACGATGATCACGGCGCCTGCACGAGTGATA
>MATOU-v1_1327516
CCCTGCTTTCGCGCGATTTGTGGAGCAGACAGAAAGACTGAAGGAGAGTCGGAAACTGGA
GCTGAACGGGTACTTGACGAAACCGACGACTAGATTAGCTCGGTATCCATTGCTGCTGGA
GAATGTCTTGAAGTACACCGCCGACGACAACCCGGACAAGACCGACGTGCCGAAGGCGAT
TGAAGCAATCAGGAAGACGCTGTCAAGAGTAAACGAGGAGTCGGGCAAGGCGGAGAACCA
CTACAACCTTATGAGTCTGAACGCGCAGCTAAAATGGGGCTCGATTCCTCACATGGACCT
CAAGCTCACCGAAGAGAGCAGACAATTGATCTTTAAGAGCAACTTGAAGAAGACGCCGAC
ATCCGAGCAGGCTGATGTGACCGCATATTTGTTTGATCATGCTGTGTTGCTGGTGAGGGT
GAAGGTGGTGAATAAGAAAGAAGAAGTGCGAGTCTATCGAAAGCCAATACCGTTGGAGCT
GTTGCAGATCAAGGAGATGGATGCCGTGCTTCCACGCATGGGAATTACAAAACGACCAAG
CAGCTCGATGATACCAGGTGTTGGCAGAAGTCAGGCAAGGCCGAGCGCGGCGGCCGATGG
CGCTAACGGGTTCCCAATCACCTTCAAAGGTCTTGGCAAAGGCGGCTACGAATTGACGCT
CTACTGCACCAGTCAGATCCAAAGAGAGAAGTGGATGGAGCACATCCAAACGCAGAAGGA
AAAACTGAGCGAACGCCACAAGATCTTCACCATGACGAAGCTGTCTGAAGGCTTCTTTAA
TACCACTGTCAAAATCAACTGTTGCAGACCAATCGACGGGGGTAGGAAATTGGTAATCGG
GACAGACTTCGGTGTGTATTTAAGCGACCGGAAGCCGAAGGATGCCTCACAGAAACCGAG
AAGGCTGCTAGAGGTCAGACTCGTCAGTCAGGTCGAGGTGCTAGAGCAGCACCAGATTCT
CATCGTCCTAGCGGACAAGGCGGTCTACACCTACCCACTCGAGGCACTGGACCCAGAGGA
AGGTCCTAGTGCCCCAAGCAAGCGTGGAAGAAGAATCTGCCATGCGAACTACATCAACGC
TGGCATGTGCAACGGACAAACTCTAGTATGCTGCGTCAAGAGCTCAAGCTTGAGCAGCAC
TGTCAAAGTCTTCGAACCCATGGATTCCATGACAAAGGGCAAGAAGAAGAGCGGTTTCGC
CAAGATGCTCGCAAGCGGTCAGGAGATGCTGAAGCCATACAAGGAGTTCTACATTCCTAT
GGAAAGCAACAGCATCCACTTCCTCCGCAGCAAACTCTGCGTCGGCGGTGCTAAAGGCTT
TGAGATTGTCAGCCTTGAGACGCTCGAGACCCAATCTCTCCTCGACCAAGCCGACACGTC
CCTGGACTTCGTGGCACGGAGAGAGAACGTCAAACCCATCTACATCGAGCGGAACACCTC
CGAGTTCCTGCTCTGTTACAACGACTTCAGCTTCTACGTCAACAAGAACGGATGGCGAGC
GCGCGGCGACTGGAAGATCTTATGGGAAGGCAGTCCGCAGGCGTTTGCGACGTGGGG
>MATOU-v1_1328505
GGTCTGGATATGAGTATGCCGGGCGATGGCTTAATATGGCAAGATGGTAAGCCGCTGTGG
GGACACGAGCTAACGAAGGCGGTCTTGAACGGGACATTGCCCATGGAACGGCTAGACGAC
ATGGTCCTTCGCATTGCTGCGGCCTGGTATCAAATGGAACAAGACGACGAAGACAAGTGG
CCTAGTTTGGCTGAGGGTGGAAAGCCCAACTTCAGTTCCTGGACTGATGCTGAAGTAGGG
CAGCTGCACCCTGGCGCTAGCAACAGTCAAGAGAAGGGTGTAGTCAACAAATTCGTCGAA
GTCAGGCAGACAGAAGAGGGAGGGGATCACGATGATCTGGCGAGGACGATCGCAAGGGAA
GGTATCGTCTTGCTGAAAAACGATAAGAAAGCTTTGCCGATATCGAGAAACGGCAGTGCG
CTCGAGAGCGGAGCACAGGACGGGAAGGTCAGAGTTGGTGTCTTTGGTGAGGATGCTTTT
CCGAACCCCGATGGACCAAATGCTTGCCCGGACCGAGGGTGTAACGACGGAACTCTTGCT
ATGGGCTGGGGTTCTGGTGCGGCGGAATTTCCTTACCTTGTCTCTCCTGCCGAGGCTCTG
CATTCTAATTTCGACATGCAGACCGTCGAAGTTACGGACTGGAAGACCAACAAAGTGGAG
CACGTGGATGGTACTGCGGCCGCACAAGACGTCTGTCTAGTCTTCGTCAACTCGGACTCT
GGTGAGGGATACATCAGCTGGAACGGTATCAAGGGTGATCGCAACGACCTCCTTCCTCAG
AAAGGCGGCAACGAGCTCGTGACAGCCGTAGCTGCCAACTGCGGTGGAAAGTCAGAGAGC
GGTGCGCCGCTTGGCAAGACTATAGTCGTCGTGCACGCCGTCGGCCCGGTAATACTCGAA
AGCTGGATCGAACACGCTGGCGTTCATGCGGTTCTTGTTGCTCATCTTCCAGGTCAGGAA
AGCGGAAATGCACTGGCGGATATCATCTTTGGGGACTTTAGTCCTTCCGGCCACTTACCT
TATACAGCCCGGAGCGAAGAAGACTACGGCCCAGATAGCGGGATTTTGAGGATGCCAAAC
GGCGTGGTTCCGCAGCAGAACTTCAGCGAAGGGCTATACTTCGATTATCGCTATTTCGAC
AAGCACTCTATTGACCTTCGGTATGAGTTCGGCTATGGAATGTCATACACCACTTTCGAG
CTCAGTGAAGTACACCTTATGAGCCATGCGCAGCAGGGCGTGCCTGTGTACCCGGCTGAC
CGAGCACCCGCGACAGCCACGCCACCTGAGATGAACAGCTCTGCCCCCGATCCCAAGGAT
GCGATGTGGCCAAAGGGTCTAACGAGGTTGAAGGGATACATCTACCCTTACATTACCTCT
CTCTCCGAAGGGAAGGGGAGTAGCAAGGAGCCATACCCGTATCCAAATGGGTACAGTGAG
GAGCAACATGCATTCTCCCAGGCTGGCGGGGACGAAGGCGGCAACCCAGATCTCTATCAC
ACCATCGCTACTGTCGAAGGAACGCTGACGAATACAGGCGATATGCCGGGTGACGCTGTA
GTGCAGGTCTACGTCAGCTATCCTGCCGACGTCAAGTCCCCCGTTACAGGCCAGCCGGTG
GACATGCCAGTAAAGGTGCTCAGACAATTTGAGAAGCTCCATACCGTGACATACAAGACT
TTCAAGATTGCCCTGTCGAGGAAAGACCTCAGTTACTGGGACATTGCCGCTCAGAATTGG
GTCTTGCCCAGTGGCGAGTTCACGGTTAGTGTTGGATGGAGCTCGAGGGATCTACCGGTG
AAGGAGACTCTGCAGGTGAAAGCGGTATCGTCGTCGATATAATCGGTTGTACATGTAATT
TGTGATCTAGCGTAGGCGCTTTGGGTTTTGAGGAGCAAGGGTTCGACGGCGGGGTGTTTG
GGCTGAGAAATTGGAGGCCTGTCTATCCTTACATTGAGCTTCATCTGTCCAGCTTCGACA
AATTTTTTGAACGCCGAAATAATACCATAAGCCCTAC
>MATOU-v1_1330315
AGAAACGTGTCAAGGCCTTATGATGGTAGTCGGAGCCATACAAAACCCCGATCTACTGTG
ACGAATGCAAGGTAACGTCTTGCCTCCATCCAGACTATGAATATGGACAGCCCAGAGCAA
TGTATTCACTGAGTACAAAGCGTCTTGAATAGCTCTGCAACGACTTGAGCACTCTTCTTG
GGGTATCGTTTCTGCCCTCCTTCGTAATCCACATACGTTACGCCAAACCGTGTCTCATAG
CCTTCAGCCCATTCGAAGTTGTCCATCAAGCTCCAAGCCATGTAGCCTCGACAATCCACG
CCATCAGCCGTGACAGCTTCAGCGAGAGCATTGATATAATCGCGGAAATATCCAGCTCGG
AAATCATCCTGAAGTATCTCATCCTTAGTCATGTCGTTTTCCCCCTTCAGGCTGGTGCCA
TTCTCTGTGACGTAGATGATGGGCTTGTCGTAACGATCGGAAATCCATTTAATAAGTTTG
CGGAAGCCTTGCGCATTCGGACGTAGCCATGGGGACTGCGTCTCCGGACCAATCCAAGTG
CCGTTCTTGTCTTGAAGCAGTAGCTCGAGGTTACCTGCAAAGTCCTCTGGCTCTGGCGGG
GTGGACTTATGTTTGATGTAGTTCGCGCAGTAGTGGTTCATGCCGTAGAAGTCATTCGAT
CCTTGGACCTCCTTTCGTTCAGATTCGGTGAAAGTGGGCAGCCGATCGCCAAGCTGCTTT
CGCATGCTCGCGGGATAGTCTCCCTTGTATATTGGGTCCGCATACCAGGCAATCGAGAAT
TCCAACTTCCGCTCACACGCTTCGACGTCCTCCGGGTCATTGGGATCCCACGGCTCGACC
CAATCACCGTTCAAGGTAATACCAATCTGTCCGCCGTCCTTCTGCTTGAACTCCTCTCGG
TAGACCTTCACTGCAGCACCGTGCGAAACAAGGATGTTATGTCCAGCCAGCCATGGTTCG
ACGGCGCTGTTGCCGACTGCGCTCTTGGTCCGATCGTTGGTGTGCCCAGGTGCAAATTGT
CCAATACTGTACCCAAGGATTGTGGAGCACCATGGCTCGTTGTAAGTGATCCAGTACTTA
ACTTTGCTTCCCAAGGCACCGAACATGACTCTCGCAAAGTTTACATAATCCTGAACATAC
TCCTCCTTGTTGAGAAAGCCTCCGTATCGATCATACAGCGCTTGCGGAAGATCCCAGTGG
AAGAGCGTAATCATTGGGACAATGCCATTAGCCACAAGCTCGTCAACCAGGTTGACGTAA
TATTTCAGGCCGGGCTCATTGATGGGGTCCTTCCTGCCTCCTAGCGGTATCACGCGGCTC
CAGGAAATGCTAAATCGGTATGCTTTGGCGCCGAGTTGCTTCAATAGGGCCACGTCTTCT
TTATACCGGTGGTAAGAGTCACATGCCACATCACCGGAGGTCCCGTCTGCGATCTTCCCT
GGGATACGGCAGAAGGTGTCCCAGATGGAGTCGCCACGGCCGTCCTCATGAGGTGCTCCC
TCAATTTGATAGCTTGCGGTAGCATAGCCCCAGAGGAAGTCTTTCGGTAAGCGAGCTGTC
GACATATTGCTATCAACCTTCAATCGAATCCCCATGT
>MATOU-v1_1330622
TATCGGATCGCTGAGAGCTCCTCTTATGGCAACCCATCTGGTAACATGAGTTGGTCGAGC
CAGATTGTTGAGAATGCAAAAGAGAGGACTATTGATACGCTGTTCAATAAGAACTTCGTC
CCATGGAAATTCCACCCACGCTTTTCCGACTTCGAACCCGAGTTGGGTGATGACTCAACG
TATATTAAGTCGATTACACTCCAACAAAACGCGTCCGATCCAGCAGGCATCGCAAAGCCT
ACCACTGGCAGTGTAGATGAATCATACACGGTAGACATGTCCGCCAACGGCGAGGTGACG
ATCACTGCCGGATCGTCTATCGGCCTCTCTTATGGCTTAACAACCTTCACGCAACTGTTC
TACAAGTGCAGCAAAGGCGATGGTGTATATACCACACTCGCGCCGGTCCACATCGCTGAC
TCGCCCATGTTCCCCTGGCGAGGCTTGAACATTGACACGTCTCGCACGTTCAAGCCTATG
CAGGACATGTATGCCATGATTGACTCCATGGCGTTCAACAAGATGAACAGGCTACACTGG
CATGTCACCGACGCACAAGCCTGGCCTCTAGAGATTAACAGCATGCCTGAGCTAGCAGAC
GAAGGTGCTTATACCTCTTTCCAGAAATACTCTTCCGAAGATGTGAAGGCACTGCAAGAG
TATGGCGCTCTTGTCGGTGTCGAGGTGGTGATGGAGATTGACAATCCTGGTCATACTTCC
TCTATTGCCTTCTCGCATCCCGATCTGATTGCAGCGTTCAATGTGCAGCCTGATTGGAAT
ACCTACGCCGCTGAGCCGCCATCAGGAACATTGAAGCTCAATTCGACTGCCGTGTACGAA
TTTCTGGAGAAGCTGTTTGACGATTTGTTGCCAAGGCTGGAACCATTGACGAGCTACTTC
CACTTGGGAGGCGATGAGGTCAACATGAATGCGTATAATCTGGATGATACCGTTGAGAGC
AACTTATCGTCGGTTCTTCAGCCGCTGATGCAGAAGTACATGGATCGCAACATGGATCAG
ATCGAGTCCGCAGGCTTCACCCCACTCGTGTGGGAGGAGATGTTGCTGGAGTGGAATTTG
ACGTTACCGGACAACACTATCGTGCAGTCATGGCAAAGCGACGAGGCACTTGCTGAGATT
GTTTCGAAAGGTTACAGGGGCTTGGCAGGAAACTACAACTATTGGTACAAAGGTTATAGG
GGCTTGGCAGGAAACTACAACTACTGGTACCTGGACTGTGGCAAAGGCCAGTGGTTGAAC
TTTTATCAAGGCGAAAGCTCGCAGCAGTACTGGCCCTACCTTGATTACTGTGACCCATTC
AAGAACTGGAGGCTGATGTACAGCTATGACCCTCTGAACGGTATCCCAGACAATGCCACG
CACCTGGTACTCGGCGGCGAAACGCACATCTGGTCTGAGCAGACTGATGCTGTGAATCTT
GAATACATGGTTTGGCCGAGAGCATGTGCAGCCGCAGAGGTCCTGTGGAGTGGCGCCAAG
GATGCTAGCGGGCAGAATAGAAGTCAGATCACAGCTGCACCGAGGTTGAGTGAGATGAGA
GAGCGATTGGTGGCGAGAGGTGTGCATGCGGATGCTATCCAAATGCCGTTTTGTGTTATG
AACGGGACTCAATGTGCCCTGTAATGCGTGCGTCGCCTATCGACCTTTACTAGGCGCGAT
CCGGAACGGGAGCCGCCGGTGTAGATGCATGCTAATATCAACGTAGTCTGGCTCCGTTTC
AGGGGT
>MATOU-v1_1331158
GCTTCATCCTGATCAAATGGCTATTCGCAAGCATCGTACCGGCAAATTCGAATAAATCAA
GCTCTGCAGTTATCATGAGCGGTTATCACCTGTAGTGCACAAGAGACCGCCTCTCAACAA
ATTGCTCATTACTATGTAGGCAAAAGCCTTCTAAAAGGATGCGCTTCGGTATTGAACACC
CACTCATCTAGGTTCACAACGTCGGGTTCACTGAAGACGAGGTAGAAGTACTTGAGCGTC
TCAGCCATCCAGAAACTCTCCATGCTGTCCATCTGTGTATTGCCTGCGCTCGTTCGCGCC
AGCTGCTCCCGCGTGAGCGTGATATCGCTCATTGCTGCGTTCGCTAAGTGCGTTTCGGAG
GCATTTGTGATGGCTGTGAACATATCCCATGCAGCGTCTTGATACTTCTGCTCACCAGTC
ATGCGGTATAGGAGGAACACAGATTCGATGGCCTCCGGTCGTAGGATATACCGTCGGTCT
CCAATCTCGGTAAATCCCCTCTGCAGGCGTTTCTCGGCAATCACGCTGTCCACATCTTCC
GCATTGTCGTGTCGCTCACTAATGAGTTCTCGCCACCTAGTCTCATTCCACGGGCAAGAT
ACCCGTGACTCGCAAGGGGCCATATGGAATACTTCAGGCATAATGCCCAAAGGCATGTTC
TTGTACGTCCAGATGCATCCGTCGGTCAACTTCTTGCCGATCTCGACGTGTAAAGGCTCG
TCGAATAGCTTGCCACCCAACGCGAACATGCCACCGGCGAAGCACACGAGATGCTGGCCT
TGAGGGTCTAGCCGAGCGCTGCTAGGTGTCATTGCTTTCACATTCCCAGATACTAGGACA
TCCGCCTCGTCTGGCAGCATCGGCCGCCATAGATTGTACTTAATGGCCGTCTTCATACTG
CCATCATACATCTTCTTGTATATCGGTTCCAAGCCACCTAGAAGCGCATGCATTTTAGGG
AAGTACTCGTACAAAGAGTCCGACATTGCCGAGAGCGTGAAGTAGGTATCTTCCGTGAAC
TCTGCATCTTGTGCGTTGACCGTGACAGGCCACATCCCAGGCAAATGCGTGCTGTACTGC
GAAGTGTCAAAGAGTCTCATAATCCGTGCCGTCGCATCGTACCACTTCGGGTCGCCGGTG
ATGATGGACAATCGCGTAAACTCCATCTCCAGGGAGCCGATCTCAGCAACGAGTACGGTC
GGATCAGCCACCTGAGGTCCCTTGATATATTCTTGAGGCTTCCACCTGGTGATCGGGAGC
CTGTTGGGCGTATCGAATGCTCGTATAAGCATCTCCCCGAATTCTTTTGCCTTCTGCAGC
AATCGCCCGTCGCCACTCATGTCGTAGGCGGAAAGAAAACCTCCCAAATGTCTAATCGTA
GTCTCGAAGACATTGATGGTTTCAGTCGTCGCGGAGCTTAGATCAATGTCAATTGAAGCT
TGAACGGCCTCTTCGAATTCTGCTTCCAATCCCATAATCCATAGGTTGTCGAGATTGTCG
ACAAGGCTAGCTCCCCAACCTCCAAAGCCATCACGAACGCCGCCTGAAATGGGAGCAAGC
TCGTCATGACCCCATGCGTGCTCCTTGTATGACTTCCACGAACGCTCGAAAGTTGCCTTT
ACGGCTGCCTGGCGTTGCTTGCGGACAGACTCGTGCTCCTTCGTCTCAGCTTGGAAAGCG
TATTGGACCTTAGGAAGTTGCTTTGGCTTCCCAGAAGGGATTTCTACCGGATGATCTACT
TTATGTCGAACTGGCAATGATGCCCAGCTGAACTTTCCGCTCTGTGTTGCTGCATCTTCA
CCGCTTGAGGGTGCAGTGCTGACTCCAGGGACATGCTGGTTGTAGCGCGTTCGGGCAGAA
TGAACGATGCCTTCCCGGAAGAAACTAAAAGTGTAGATGATACAAGCTGCTACGCCGAGA
TACAACACA
>MATOU-v1_1332467
TATGACCGAAGAGCGTGTGCGGGGTTGATCGCGCTAGGACAGCTCAATGAAAGCTGCCAA
TCACGATTGGCGGAATGGCATGTTCAGCTGTCGCGTCCGACGGCTATCCTAGCAGGAGGG
CTTCGGCTTTTTCACAAAGGATAACGTTAAGCGCTAGAAAACATGCAGGCGGAGCTCGCG
TATCGCGAATATGGAGACATCGTACGCCCGCTTTCTAGAAATCTAGGCGCCTGCTTATCT
CTCTTTGGACGGGACAAAGGCAACCCTTTGTTCGATGGCGATATGTGCATTGTGAATTTA
TTACAGTCTTAAGCTTGAGTAAACGCCAGATGCAAACACGCTACATGACGCCTCGATTGA
ATCATCAATTGAACATCTCACGGGATCTACAAGGTGCAGTCTGCAAGCTTTCTCCGATTC
CTACACTGTTCGAAACTTTTCTATCTGTAGCAACGCCGTTGGAAAGCCTTGCAACTATGT
CTCAAGAAAGTGTCAAGCACAAGTTTACGGTAGACGCACTTGACACAAGAGGTCCTACGA
GAGACAACGGACCTCAGCCGGAAGCATTGCCGGAGGTGAAGAAGACTGAAGTCCATCCCA
ACGGCAGCAATAATGATGAAAATGCGAGTATCTACTTTGTCGGCACGGCGACCACCATAC
TGGAGTGGGAAGGCATTCGCCTCATGACCGACCCAAACTTCCTTCACGCCGGTGACCATG
TTCATCTTGGCCCGGGTGTGACCGGCGCAAGGCAGACAAACCCGGCGATGGATCTCAATG
AAGTCCCACGCATAGATGCCGTACTCCTGAGCCATTACCATGCGGACCACTTTGACCAGC
AGGTCGAGGACTCACTGCGGCGAGATCTGCCCATCGTCACCACACCGCACGCCAAGGAAT
GTCTGCAGGTCAAGAAAGCAGAAAGCCAGAAGTTTACTCGTGTTTACGATCTTGACTTTT
TCGAAAGCACGTCAATCAATATTAAAGCGGCCAGTGCGCGATCGAGCAGCAGAAGCCCGT
CAATCAAGGTGACAGGTATGCCTGGCAAGCATGTTCCGCCGGGACCACTGGCTGCTGCCA
ACGACCTGCTGGGTGCAGTTCCTCCAACCAACGGTTGGATGATCGAACTAGGCTACAATT
CCGACGAAAAGTTCCAGTCAGGATACCGTATATATATTTCCGGCGACACACTGATGGTAG
ACGAGTTGCAAGAGATACCCAAGCGTTATGCTGGGCATAACATCGACTTGATGTTGGTGC
ATCTTGGCGGCACCGTTATCCCAGGACCGAAATCACCTCTGCTCATGGTGACTATGGACG
CCACTCATGGTATACAACTGATGAGCCTCATCAAACCAGGTGTGACAATACCCATCCACT
ACGACGACTATGACGTGTTTATGAGCCCATTGGAGGATTTCAAGAAGGCTGTGTCAAGTG
CAGGGTGGGATGACAGAGTCGTATACCTTGATCGCGCAGATCAGTACAGGTTTACAGTAA
AAGGCTAGCAGGGGTTGAATGCAGCAATCTTTAAGATGCAAATGCTTTTATGTAAATGTG
GTAACAGATTCTCCTCAGGTGAGCCCTACTATGTCTGTAACGCCCCGCTATGCTGTCGTC
ATGCATAATCTATCCCAAGAATCCCCGAAGCACATCGCTCATTGGCCCAACTGTGCGCTC
TGTGTACGCTCAAGGGTTGGGCTCTGCTGGAACTGTGGTTCTTCACTGTTGAAGAAATCA
CCACGGCGAATGCCACTGCGTTCACACATGCTGCGGAAGATGCCACCCGCATCGTACAAG
CGGATGGGCGAGTCCAACTCGGCAACGTTGTCTTGGTCCATGACCAGGATTCTGTCATAG
CCGATGATAGTCTTTAATCGATGAGCAATGATCAGCAGCGTCCTGCCTGCGAAGCTGCGC
ACAATGGTCTTCCGAATCCTTTGATCCGTCTCAAAGTCGACGGAGGATGTAGCCTCATCA
CAGACGATGATTTGAGAGTTTCTCACGAGCGCACGGGCCAGAGCGAGAAGCTGCCGTCGT
CCCAAAGAAAAGTTGAGGCCCTCATTCTCGACAGCTGTGTCCGTCTAGATGTATGCAACC
GGGTCCATCTTCGATGGCTTGCTCAGCATCAACCAGATCAGCTTGCCGCAACGGGTTCCA
CAGCTCGAGGTCTGAATGCTCATCAAATGGATCTAGATTGCTGCGGATGGTGCCACGGAA
GAGAGTCGGGTCCTGTAGAACTCCAACCCTACGTGGTCGCGCAACCCAGATTGGACTCGC
TGGAGTCAAAGTGTGAAGAGAGTGACAGTTGGATCATGTAACAAAGTGTAGTAGGTGTAA
GCTCTTAGTCGGATTGCAATATGAGC
>MATOU-v1_1334334
TCAAGTCTCCCTCTTCGCCTCCAGCGCAGTCGTCTTCATCTTCACCCTCCTTCTCTTCCT
TTCCGGTTATGTCATTCAACAGCGCACAGTCAAAGGCCTGCAGGTAGCCATCAAGCCGCG
AATACCAGACCCACCGCCATCACTCCAACTCCAACGGAAGGATGAAGGTCCGCAGTTGCA
ACCAAGCCGGCATTTCCGGGCGAGTGACAAGGTGGCCTTCACCAACCTCGACGCGGTACA
GCAACAGCGAGACAGTATAGACTGGACGAGACTGGCCCATGTGCAGCTGACGAGAAATCA
TCATGATGTGTGCAATGCTGTCATGGTGCTGGCAGATCTACACCGACTGAAGAGCCCGGC
GAGGAGGGTCCTGATGTTCCCAGAGGACTGGGCTCTAGATCAGCAGGGAAAGAAGCACGA
CATAAGCGATCCCTTCTTGGCTAGCAGCAAGCGATTACTACGAATGGCCGCGAGAAGATA
CGGCGTAGAGTTACGGCCTGTTAGTCCGGCATTACGGGCAAATGATGAGCTTGACGGAAG
CAGCAACATCTACTCCCTCGCTTCTGCCTTTGCTTTGAAAGACTTCGATCGGGTTCTTTC
GGTCGAGGCCCCTGGCCTCATAATAGATGCACTACCTCTTGACGCTGTACTGGCCTTCAC
CGAAAGTACGCCATTCGCAATGCTGCAGGACAGCCATGATGGCGATGGTGTACACTCTGC
GGACTTGCTTCTGCTCAAGCCGTCCGCTTCATCGCATGCCGAATTGCTGGAACGATTAGG
CATGGAGTCGAATTTCAACGACTCGATAATCCCAACTCTCTTTACGGATCCTTTACTTCT
CGCCTCCAAGACAGATGACTACACTCTCATTCGGTCGATCGGCACACTACACCAGGTGGC
CCAAGATTTCAACGCAACAGCGTACCTAGATCGCGTCTCATACATTCGTTTCTCCGATCC
GAAGCTACCTGGTCCCGAGTACGACATTCCATGGCCCCAGAAAGTTGCCGCGCGGCCTAG
CAATAAGGACGCTGACTGGACATGGACCAAACTTTACGGCGAGTTCGCGCAGAAACGTAT
AGACGTATGTGGACTGGATCTTGAAACATGGCGCGCCTAGAGAAGACCTTATATATGTAA
GGTGCGTCTTATGATTAAAGTGCATAGCGGGCATAGCCTGGTTTCTGCGTGAACGGCGAT
CAGATGGAGCATGGGCTGGTGCAAAAGGGCGACCTCGTTGACTGGCGTTTTCTTTGGCTT
TTCCAAGAGTGTTTATGATATCCCAATACAA
>MATOU-v1_1335578
TGCGGGGCTCGCGGGGCTCTGAGCGCGTTATATGCGCCAGCGACGAGGATGGCCATGAAT
TAATGCATTCAAAGGGCAAGCCGGATCGTTGAGCATGCAAGTCACATCAGGCTCAATGCG
CTGTGTGGCTGCGTTACCCACGGCGTCGATTGTCTGTCTTACTATAAAGCTGCCGTAGAG
GCTCGACGACAATCAAAGCAGCGCAAGCCTTGCCAACACAAAACTCAAACCATGGCCTTG
CGAAATGCTCTCCTAGTTTCCTTGAGCGCCGTGGCCACCTTGGCCCAGGGTCCAGCCGAC
TACATCGACCACCAGGGTCCAGCCGACTACATCGACCAGCCTTCTTCAGAGCCAAGAGAC
TACCCTTACTTGAACAACCAGACCATCGCCTATCCGCCCGAGGGCGACCAGCTTAGCTAC
CCACGTTACGTCGAGCTGCTTGACGGCACCATCCTAGTCACCACGGACGGCGGCGCCACG
GGTCCCGACGGCCTTCCAGCCTTTCCCGTCTTCGCCAGCACCGATGGCGGAGCATCCTGG
GATCAGATCTCGAATATCACGGACCAGGTCAATGGCTGGGGTCTGGGCGCCCAGCCGGCG
CTCATGGAGCTCACGGAGTCCCTCGGCGGTTACGATGAGGGAACTATCCTGGCTTCTGGC
AATAGCTGGAGCGGCAACGGGACAAGAATCGACCTCTATGCCAGCAAGGATAAGGCGCAG
ACGTGGGAGTTTGTTAGTCATATTGCGGAAGGTGGCCCGCCGAACACCACGAACGGCGCT
ACGCCAATCTGGGAGCCGTACCTCATGCTCTACAACCATGAACTCGTCGCTTTCTACTCC
GACCAGCGCGACCCAGCTCACGGCCAAAAACTCGCCCACCAATGTAGCAAGGACCTCCGC
CACTGGGGTCCCGTCGTTAATGATGTCGCCTACCCCACCTACGCTGACCGCCCGGGGATG
ACAGTAATCACGGAGCTGCCCAACGGCAAATGGATGTTCGTGCATGAGTACCCCGGCGGC
TACTCTCTGGGCCTCGCCCGATACCCGGTCTTCTATCACATCGCCAACTCGCCCGTCACG
TTCTACGAGGACGACCCGCACGGTACGCCGCTAATTGCCCAGGGATTCCAGCCCAGCAGT
TCGCCGTTTGTGGTATGGTCGCCGCAGGGCGGGGACAACGGGACGATTGTAGTCAGTGAT
GCAGACCACACCGGAGTCTTTGTCAACACCATGCTTGGCGATCCGACTGGGTGGCGGTAC
AAACTGACTGGGGCGCGCGACGCGTACAGCCGGGCGCTGGCAATTTGGAATGGGCAGCCG
AACAAGCTGGCTATTATCAGTGGCGCGGCGTACGGTGATAGCCAGAATAACATCACGAAC
CCGTTGACGCTGAATGTGTTGAACCTGGAGGAGCTGATCTGGCAAAACCCCCCTCCGGAC
CCTGTGACGCCGCTGTCAATCTACTATCCTGACCTAGGGAACACTGGAAATCAATAGTGG
GAGTTAGGATTGGAAATGTGAGACTGCTCCCGAGCGTCCAAGCTAAAGGAAGTGTATTCT
GCGTCGGCAATATACCGTAGATCTTTCGTACGTGGACGCTTGCTGAATCCTGATCTCTTA
TTAAATTCTCGAAAAAA
>MATOU-v1_1336020
GATTCTTGATTTTCTCCTCGTCAGAGATGATCTGAAGTCGGACCGGTCTATACCAGATAC
GTCAATGATGCAGCCGATAGAACGTTTCTCTATGCATGAATACTCATGACGATTACTCCT
CCTGAGTCCCACCAGTCAAGATATCATCTGCGATCTTCTCCGCCAGCATGTAAATACCCG
ACTGCGGGTGTCCGGGCGTCAGGAATGGGAAGGCCGAAGCATCCACCACTCGCAGGCCAT
TCACGCCGTAGACCCTCGCGCGCGGATCGACGACGGCCATCGAGTCGTTGGCCCGACCCA
TCTTGCACGTCGCCGAAGCGTGGTAGATCTCAATTACGGACTTTTGGATGAAGTCGAGGA
TCTCGGCGTCCGTGGTGACGTTCGGGCCCGGGAAGTACTCCTCCCCAATGGTGACATTGC
CCATATTCTCCCACACCTGTCTCGCGCGCTTGAAGCCGGCAATAGCAATGTCCTTGTCTT
CTGGCGCGGTCAACCAGTTGGGATTGATGACAGGGTAGTCCGACATATCGGCCGAGCTAA
TCGTGACGTTTCCTCGTGAGAACGGCGTGATTAGGACGGGGGAGATGGTGGCATAGTTAT
ACCCGTCCACGACACTGCCCGTCCTGTAGTTGCGATTGTATCCGAAGTAGCCGTCCGCTG
CGAGGTACTCGACTTCCGGCCAATCGGCGGGGAAACAGTCTTCAATTGCCTCGATAGTGG
AGTCGGACAGGAGCTCCGGCGCAGCGTCCGAGATGCGTTCGTATGCGAGGAACGAAGCCG
GGGCGGCAAGAGGCCCCGTTGCGTTCGTAAGATACGACGCCACTGCATTCGCGGCGAAGA
CCGGATCGAGCGCAAAGTTTGAGCCGGTCAGGACGTTCACGCGGTAGGAAATGCCGAATC
CGAACGGCTGGTCCCAGAGGTTCTGTCCGACGCCTGCGAGGTCTGAGATGACGGGGATGT
CGAAGTTCTGGAGCGTTTCCGCTGGGCCGACACCAGAGACCATGAGCATCTGCGGCGAGC
GGAAAGCCCCAGCTGAGAGGATGACCTCGCGTGTGGCGGAAAGGGTGAAGTTGTACCCCG
CTGTAGTCACTATAACGCCAGTAGCAGTGGCATTTCCATCGAAGAGGATCTTCCGCGCAA
GTGCTTTGGTGTAAACTTGCAGCCCGGTCGTGGACTGGATGGCGTAGTCCAAGAAGCTGG
TCTGAGAGGATTCGCGGTGCATCTCCACATCGACCGTCGAAGGGGCCCAGCTCGAGCCGT
GCAATTCTCCACTGTTAGTATCGTCGGCGGGCGGGATCCCAATAGCTTCCATTCCAAGCC
TCGCCCATGTGGCAATCGGTGATGCCCAGTTGCCCCATGTGACCGAGAGCGGGCGGTGAT
AGCTGGAGTCGTTTGAGCTCGCGAACGCAGCTGGGTTGTACCGGACCGTGGCATTGTCAA
AACGCTTCTCCTCGTTTGGCGGAGTCAGGTTGACGCTGCGTTTGAAGAACTTCAGCAGGT
TGGCGAAAGTGTAACTCTGGTCGCCCACTTCGTCCGCCCATTTCTGATAGGAGCCTATGG
TACCCCGGTGGTAGACAAAGTAGTTCCGGGCAGAGCCTCCACCCAATGTCTTGCCGGAGG
CATAATGCAGTCTGCGGCCACCTGCGCCCGCCTGAGGCGTAGTCACATAACCCCAGTCGA
TCAAAGGCTGTACATCCTGAGGGTCAGATCCAGTATACTGCGTTGTTGCCACACCTGGAA
TTACGCTGTTATTGCCATTGTCTGTCTGGTAAAAGTCGCCAGCTTCAATCACCGCAACGC
TCCATCCGGCCTCGGCCAATCGAGCTGCAATGGTGTTGCCTGCCGTTCCACCGCCAACCA
CTACATAGTCGTACGTAGCATTGACACCGGGAATCCCAAACGCACTCGGCCAGAGCTGAA
AGGCATTGGCCGCCTTACTCGCTGCAAGCAGACCCAGCAATCCAGATATGAGCTGCATAT
TAAAGATA
>MATOU-v1_1337785
GGGCGCGATCGTCTTGACTCGGTCAGAGGAGTGGCACAAAAGCTGCAAGCATTCGAGATC
TTCCTCGAGCGAAATCCTGAATGGCGCGATCAGGTGGTTCTCATCCAAGTCACGAGTCCG
ACCAGTATCGAGGAGCGAGAAGACAAAGGCGACAAGACAGCAAACAAGATCAGCGATCTC
GTGGCACGGATCAATGGTGCCTTTGGCTCTTTAAGCTTTACCCCTGTCCAACACTATCCA
CAGTATTTGTCAAAGGAGGAGTACTTTGCTTTGCTCCGCGTGGCCGACGTAGGCCTGATC
ACCAGTGTTCGAGACGGCATGAACACTACAGCGCTGGAATATGTCATTTGCCAAAGGGAC
AATCACGGCCCGCTCATTATATCAGAATTCTCTGGAACTGCTGGAAGCCTTGGTAATGCC
ATGCACATCAATCCATGGGATCTGAGTGGCACAGCTGATGCGATTGATTTGGCTCTCACT
ATGGACCCCAAGGATAAAGCACTCGCACACAGCAAGCTCTACAAGCACGTCACTGACAGC
ACTGTTCAAGCTTGGACGGGTAGCTACTTAAAGCGCTTGCTCACTAACCTTGCTTCGTTC
GACCAGTCTAGTGCGACACCTGCACTTGACCGCGCAAAGCTGCTAGCGCAGTACCGATCG
GCGAAGCGCCGTCTCTTCATGTTTGACTACGACGGCACCTTGACACCTATAGTTCGAGAC
CCGCAATCCGCAACGCCTTCTGACCGTGTTATCCGCAACCTGAAAATGCTCGCCTCGGAC
CCGAACAATGCCGTGTGGATTATTTCCGGCCGCGACCAACAATTCCTCGACGAGTGGATG
GGCCATATCACCGAGCTCGGTCTCTCTGCTGAACATGGCTCCTTCATGCGAAACCCCCAC
AGCCAGGACTGGGTCAACCTGACTGACCGGATGGATATGAGCTGGCAGTCGAAGGTCCTC
AGCGTGTTTGAGCATTACACACAGAAGACCCAAGGATCGTTCATCGAGCGCAAAAAGATC
GCTCTTACCTGGCATTACCGTAGGGCCGATCCAGAGTATGGGCTCTACATGGCTCGTGAA
TGTCAAAAGCATCTTGAACATACCGTCGCCAAGGATTTCGACGTCGAGGTTATGCCAGGC
AAAGCCAACCTAGAGGTCCGCCCGCGTTTCGTCAACAAGGGCGAAATTGCGAGAGCGTTG
GTGAAGAATTATGGCGAAGGCGCTAGCAAGGCACCGGACTTTGTCTACTGCCTTGGCGAT
GATTTCACTGATGAAGATATGTTCCGTTCGCTGAACGCATCCTCTCTTCAGCCGGAGCAC
GTCTTCGCCGTGACAGTCGGTGCGAGCTCGAAGCAAACTCTAGCCAAGTGGCACTTGCTC
GAGCCGGTAGTCTCGGCGCTGTCGCTGTGGTGGATGGCTCCGTGCCGGATTCGAGGCTTT
AGGAAGGCCCCGTCTTCGTCGCTGCTCCTCCCCCTCCTCCTCCACTGAGCAGTCACCAGC
AGCACCAGCAGGGTGATAACTTCGGCCGGGCGAGTGTCAAAGTGTAATACTCTCGATTGT
GTCATTGGAACGGCTATGGAGAAATCAGACATGAACAGTAGAAAGCGAAGTTATCTGAAC
CCTGAGCTAGAGCGCAGCGAACGGATTGAACAAGGGACAGTGTTACATAGTCGGAGCATG
GCATGGCTAGGTGATGCACCAAAGGAAGAGGAAAGGATCGGTCCTATGAATTTGTACCGT
AGTAGATGAGATTTTCCTCAGTAGGTGGGTGGGTAGTACTTGCAGGTGAGAGCGGGGGAT
GGACATAGACCTACAATGGGGAATGGGAAATTTTGGTGTTTGGTATCCGATACATGAT
>MATOU-v1_1339277
CCAAGCAGTTCTGTCGCCCCTCCATATTTCTTCCACCAAATCCTCCGAGGCCGTCGACTG
TGACTCTGATGAGGCTTTGCGGGTGATTGCTTGGATGGTCGCCACTGCTCTCCCACCACA
TCGCTCCGCCGAGGCCCAGTTGCTTGATGTACTCAACCTTCTGTGCAGCCACTTGGGGTG
TATCGTAAGTAACCATTGTACGGCTGGAAGCATCGTAGCACCATGAGGCCACTGCTTGTT
GGTCGTGAAGTGTCTTTGCCTGCGGTCTTGGAAGGGCCTTGTAATCCCACACGCCATTCT
CCCAGCTACCCTCTCCAACCCCACTGTAGCTGCCGCCAGGACCATTGGTGTTTTGAAAAG
CACGTCCGTACAGCGGCATACCCATGACAATCTTGTTTGCAGGGATGCCATGCTCGAGGT
AGTATCTTACAGCGTAATCGATGCTGAAGGGTGTGCTTTGCGGTCTCTCCCTGCTTGCAT
AGAGGTTGGATTGATGACCAGCTTGCTGATCCCAGGAGCCCGCGAAATCATACGCCATCA
TGTTCCAGAAGTCGAGATACTGATCCATCTCCCTAAGCTTGAGCCATTGGCAATTTGAAG
GGCCAGCTGGGGAAGCGATTGTGAGGAGGAAATGTGGATGATGGCTCAAGGACCGGCTGT
AACTGTCCAACTCGTAGCGGACGGCCTTGAGGAGGCGCACAAAATCTGAAGCTTCTGCAT
CTGACTTCGGATACTCCCAGTCGATATCCAGTCCGTCGAAACCGAGATCTTTGAGTAGGC
GCACAGAAGTCTGAGCGAAAGTCTTTCTGCCTTGCTCGGTTGATGCGGGTTTTGCAAAAT
TGCTGCTGTAGGTCCAGCCTCCGATGCTGAGGAGAACCTTCAGATTTCTGTTGCGCATTT
TGAGCAAGTACAATTGCTTTATGCATCCATAGACATTGTGCCCGACGTCGTTCCAAGAGT
CGGTTGGGTAATGCTTCTCGACATCCGACCACGAGTCAGTAAGGTAAACTTCGCCAGTTT
CCGGACGTATGTTGGCGAACGCATAAAGCACATGGGTAAGCCTCTCGGCCGGAATGTCTT
GGGGCTGATGATTGCGACCATAAATTGCCCAGTTGACGAAGTAGGCCACGCTCCGGTAGC
CCTGATGATCAGGCATCATCGGGATTTGCAAAGGTGTTTCTATCTGAGTCGAGTTGTCTG
AATGCCGTGATGGTTCGCGAAGGGGAAAGTCAAGTGCAGTGATGAGCTGGGGGAGAAGTA
TGGACAAGACAGCAAAAGCAATTGTGAGGCGGTGCACCTGATGCGCCACGTCAGCGTCCC
GTTGGCGTTCTCTCACATGAGGGCATTATCGCTGTACGCTGCACGCCTAGGAATCTTTGC
AACTCCTCTCGGGCGACGAGGGCAGCATTAAAACCCGTTTGTCGAATCGGGAAGAAGAGG
CAGCATCTCCTACTATGTA
>MATOU-v1_1339886
ACATGGGGAGCCATATCCTGAAGACACCGAATCCATTCGAGCGTGTGTGCGATACAGAGA
TCGACAGAAAGACGACCGCCCCACGCGATCGAACCTTACCTGCGCTAAGGGCGCGCGAGG
CGTCATAACATCAGCCCATCGAGCCAGCAGTACAATCGTAATAATGAGACTACACAACAC
CGCGGCCGCAGCGCTGCTGGCAGCGGCAGGCATGTCCAATGCGCTGGAGCTGCAGATTGA
CGATGACGAGTCGATCAAACAAGCGGCAAAGACTATCGCCTACGGAATGGTGAAATATTA
TTCTGGAAATGAGAGCGGCCAGGTGCCCGGGTTGCTTCCACAGCCATACTACTGGTGGGA
GGCGGGCGCCATGTTCGGCTCGCTCATTGATTATTGGTACTACACCGGCGACGAGACTTG
GAACGATATCACCACCCAGGCGATGCTCTTCCAGACCGGACCGGAAGCGAATTACATGCC
GCCCAACCAGACCAAGTCGCTCGGTAATGACGACCAAGCGTTTTGGGGAATGGCAGCGAT
GTCCGCCGCCGAACAGAAGTTCCCCAACCCACCTGATGACCAACCGCAATGGCTGGCACT
GGCACAAGCTGTCTTCAATTCGCAGGCGCTGCGCTGGAACAACGAAACATGTGCCGGAGG
TTTGAAGTGGCAGATCTTTACTTTCAACAACGGATACAACTACAAGAACTCAATCTCTAA
CGGTGCCTTCTTCAACCTGGCTGCACGCCTGGGTTTCTACACAAAGAACGAAACCTACCT
GGAGTGGGCCGATACGATGTTCGAGTGGACACGCGCCATCGGGCTCATGGACCAGAACTA
CCTGGTCTACGACGGTACTGATGACAACATCAATTGCACGAAGCTTAACCACATCCAATG
GTCCTACAACGCTGGCGTCTACCTGCTCGGCGCAGCCGTCATGTGGAATGTTACCGAAGA
CAACCCTACAAGACAGGCCCAATGGGAGACGCACGTGCGGGGCATCATCAAAGGTGCCAG
TGTCTTCTTCAAGGACAGCATCATGTACGAAGTGGCGTGCGAGCCACAGATGAACTGCAA
CACCGACCAGCAGTCGTTCAAAGCCTACCTTTCCCGCTGGATGGCCGCATCAACCAAGTT
CGCGCCTTTTGTCTATGATCTGGTCACCCCGAATCTTCAGGCCTCTGCCCAAGCCGCAGC
GCAATCCTGCTCAGGTGGTGATGACGGCGTCACATGTGGTACACGTTGGACTACAGGCGG
ATGGGACAACACATGGGGTGTCGGGCAGCAGATGAACGCTCTTGAAGTCGTCCAGGGTAT
GCTAATCCAGAAGGCAACTGGCCCAGTATCGAACGAGACCGGCGGTATCTCGCGCGGAGA
TCCCTCTGCGGGCACAGGTGGCGATTCCGCCCCTGGTACGCCTACGAGTCAAATCACCAC
CGGTGACAAGGCTGGCGCTGGTATTCTCACCGCTGTCATTCTCATCGGTCTGCTCGGTGG
AGCTTGGTGGATGATTGCATAGAGC
>MATOU-v1_1340236
CTGGGAAGCAGTCAAGAAGAATGCCTTTACTCCGCCAATCAATGATACGGCGCTGCTATA
TTACGACAGGGAGCCGTACACTCCCGACGAAGTAAGGGCAGGCTTGACCTATTACTTGGA
GCACGGTTACATACCGAACGATAGGTGGGCAGAGAGCGCCTCACGCACACTTGACTATGC
CTTTGATGACTATGCGGCTGCAGTAGTGGCCAAGTATGCTGGCGATGAGACTGCAGCTAG
AGAGCTTCGACATCGCAGTCAGAACTACCACAAAATCTTCAATAGCGAGACAGGCCTTAT
GGAAGCGAAGCACGCCAACGGTACCTGGGCCGGCAGCGACCAGGGATGGACCGAAGGCGA
CAACTGGGTATACACGTTCAACATCATGCATGACCCAGAAGGCCTAGCTGAAATGGTCGG
TGGACCAGCGAAGCTGAAAGCGAGACTGGACGAGCATTTCCAGGGCGGCCATAACGATCA
CACGAACGAGCCTTCACATCACGTTCCCTACCTCTACGCCGCCCTTGGATATCCGGCTTC
AACGCAAAACCTTACCCGTGCCATTGCAGCGGTCGACTACAATGCCACATCCGCCGGACT
CAGCGGCAATGAGGACCTGGGGCAGATGAGCGCCTGGTACGTCTTCTCCGCGCTGGGGTT
CTACCCAGTCGATCCTGCGTCGGACGGGTATATTGTCGGCGCACCGTTCTTCGAAAAAGT
GACCATCCGGCTACCGCCGGGAGCTGGTTCAGGAGGCGAGGGTGGACAGGAGCATGAGTT
AATGATAACGGCGCCCGGAGCGCCAACGATGCCGTTTGTGAAGAGTTTGCATGTTGATGG
TCAAATGGTTGATCGGCCTGGCCTCACGCATGGACAGATTGTGAATGCGCGGCATATCGC
ATTTGAGATGGCTGATACACCTCAGGCGTGGGGCACGAGGGATAGACAGAGCTCTGGTTG
ATATTTTGCATTAGATGTCATAGATGGTAGACAGCCATTGGAGTGTGTTCCCAGAACTTG
GTCGGACATGATGGAAGGTAGTATGTCCAATTCAATTTCACACG
>MATOU-v1_1340308
TTTGGTATCGAATACTGGCGGTCTTCATTGTATTACTGCTAGAGGTTATATTACAACTTC
TCGAATTGGACTAAAATGATCTATTACATATCGCTCGCTCAATGCAAATTCTCAATCGGC
GGAGGCACCCCCATCACCCTCTCGCGCTCGGGACTCGCCTTCCTCTTCCTCTTCAACAGA
CAGTACTCTCCCCAAACCCTCTTCATCCGCTCAGGTACAAATGGTAGATCTGGAACCAAT
AGCGTCCTTCCCAGCACAGTCGTGCTGAACCCATCCAAAAATGACTGACACCCAGCTCTC
TCCCACGTGCCCTCATCATTTGTATAACTCGGTTCGAGCGTGGTTGTTTCCGTCGAAGGT
AGCTGAGAATCCACAATGAAGGTACAGTGTTTCACCTCAGTATACTTGCCCACGTCCTCG
ATATTCTCATCGTTCATTCCCGGAGGGATAAGCCAGGCTCCAGGGAAAAGTCCAAAGCCT
GATCCCGCCTCGCTGAACTCGCCAGGGAGCAGGCCGGAGAATTCGGATTTGATGAATTTG
GCGCGGACGCCGTCCGGGAGGAAGTAGTGGGAAGGAAAGCGGTACCATTCCTTCCCTAGG
CATACAAAGTCGTCGAGCTTAGCTGCTCCGGAAATGGTAGAGTCGTTGTGAAGGGGTTTG
TAGACGTTCAGTGGGGCGTTGTAAGCTGTGATGGTGCCTGCGATACGGAGACCTGAGAGT
ACGAAGCTGGCAAGGCAGAAGAGAAGAAGGCCGCCCAAGCGAAGCTGGAAGGGGATCTTG
GCCACAAAGTCCTTGGGGTCCGTAGAGTTGATGTTGCCGAGGATGATGTGGAGCGAGACG
GCAGCGTTGACTGCCAGAGCTGGGTAGGCCGGGTACATGAAGCGCTCTTCCTTGTGAGGC
TGAAGGGTGAAGATGGCCAGCCAGAGGTAGAAAGGCGAGAGGAAGGTGATACTTCTAAAG
TAGCTGGCGCGGGTGTTGCCTTTCATCCTGAATGTGTGCTGCAGGACCAAGAGCGGCATG
GAGATCAGCGCGAGTAGGAACCAGACATGGAAGTTCAGAGCCAGGTTCCTCAGGTAGAAG
TGCCAAGGCTCCGTGCCGTACAAGTCCGGGCCGCCTTTGGAGGAGAAGATGTTGTATGCG
ACAATGTTCCAAGGGACGATCTGCGTCTTCTTGTAGAAAAAGGCATCGGCCATGGTTTGC
ACAAACATGATCAGGAGCGTTCGCGTGATGCCGTCCACTACACGCCAGAACAACTTCACC
ATGCCCTCTCCGTCGGAAAGCACACCCATTGAGAACTCTTCGAAGAGAAAGGGCGCACTC
AGCGCCGCAGAGAAGGGCCAGCCTAACGTGCCGGCGATACCAAACATCCAGATCCCTTGG
GCGGTTCTCAGCCCACCGCGCCAGTCCATGAAGCCAGCAATGCCGAGCGTCACAAAGTAC
ATGGCAAAGCTGCTAGGGAGGTAGGAGATGCTGGCATGCCACATGCCAGGACTACTCGCC
ATCACGGAGAGGAAAGTCAGGCCAATGCGCGGGTTGAGCGCGGCATTGATCTTACTGAAT
AGCCGCGCCTCGCAAAGCGCACACACGAAGCCAAGTACCAGACGCAGGAAAAAGAATTCG
GCGGATTTGCCCAACCCGAGCACTTTCACGGGCAGCGTGACAAGGGCGTGCAGGCCTACA
TAGGCCCAGGAGCGGATGGCGTACTCCGGGCTGTACTCCCATGTCTGGAAGCCATGGCCG
TGGGTGAGGTAGTGGGTCGGCTCCCAGTAGTTGAAGGTCTCATCGCAGTCCTGGATGGGA
TGGTAGAGTGCTGCGGCTGCGTGGGCGGCAAACAGCACTGCAAATGCAATACGGGGGTTG
AGCTGGAAAGGTGGCGTCTTCGGCGGTTGGGGGCGGTATTGCGGTTGCTGTTGCTGCTT
>MATOU-v1_1342456
TAGACAAAATCTACCAAGTTACGAAGTGCCTACTTGGGGTTCGGCTGGCAGCACCAAGCA
AGGACAGAATCGATGCTCATGAAATGAAAATCGTGTTCAAATGCAAACGTCTTCGGCCAT
TCGGTGGATCGGTAATATTCAGACGTGGGGaaaaaaaCCCCCCTTGAACAACGTCGCAGT
ATGCAATATGTAATTCAGGCGCACCTCTATATCTACCACAAGATGCTAGCCCCGCACTCC
CGGTGAACCGCTCTACTCCCTTTTCAACCCCTTCTCACCCTCCAGCCCAGACTTAGGCAT
AAAGAACGCCCTCTCGAGCGCCTTAAGCACCTCATCAATAACAATAATCGGCGCACTCCA
AGCCAGGACGATCTTCCACTCCTCCCAGCCCAGGGGCACGATGCCGAAGATGCTCTGCAG
GAGGGGCGTGTAGAGCAGGACGTAGTGCAGGACCATGGACAGCGTGATGGCGTAGATGAG
CTTCATGTTGTTCCACAGGGGCAGGGTGAGGAGGGATTCCGAGGAGGAGAGGGCGTTCAT
GGCGTTCAGCATCTCGATGACGACGAGGACAGACAGCGAGATGGTGGAGGCGGTGCGGGA
GGAGGCGTCGGTGAACATGGCGCAGCCGATCTCCGGGAAGGCGCTAGAGCAGCGGTGGAA
ATGGGTCAGTTGCCAGAAAGTGATCTGTGGACCGCCTTGGTAGAACATGAACCACCAAGC
GTACCCACCAACAGTGGCAAGACCGACGTAAGTTCCGATGACCATATACCGGAAGAACAG
CCAACCACCAACAAGCGGCTCGTCCCTCTTCCTCGGTGGTCGCTTCATGACATCGTGGTC
AGGCGGGTTGAAGCTCAGCGCGGTAGCCGGGAGTCCATCCGTCACCAAGTTGACCCAGAG
AAGTTGAACGGGAATAAGAGCCTCCGGCATTCCGAGCGCGGCCGTCAAGAAGATAGAGAC
GACTTCACCAATGTTGGACGAAATAAGGTACCGGATGAACTGCTGCGTGTTGTTGTAGAT
GCTGCGACCTTCTTCGACAGCGGCCTCGATCGTGGCAAAGTTGTCGTCGGCCAAGACCAT
GTCTGCTGCCAGCTTGGCAACGTCAGTGCCAGTGCCCATTGCGACACCAATATCACTCTT
CTTCAGGGCAGGGGCGTCGTTGACACCATCACCAGTCATGGCCACTACCTCTCCAGCAGA
TTGTAAAAGATCTACAAGCTTCGATTTGTGACCAGGCTCGGTACGGGAGAACAAAGAGGC
GTTTTTGGCAGCCTTGAGCTTGTCGCTATCGCTCAAGTCATCGAATTGACGACCTGTGAA
GCTCTTGCCCTTGAGGTTCTCATTCTCGCCAAACACGCCAATCTGTCTGCAGATGGTCTC
AGCGGTGTTCTGGTTGTCTCCAGTAATGACCACGACGCGGATGCCTGCCTGCCTGCACTG
CTTAATGCTCTCGGCCACCTCTGGGCGAGGTGGGTCAAGCATACCGACCAGACCAAGAAG
CGTCATACCTTGTTCAAGCTGCTCGTATTGCTGAGTGGTCTTGGCTTTGCTTGCCAGGTT
AGCATCAACATTGTCGATGCTCGCGAGCGCCATGACACGTAGTCCTCGGTTGCCGTACTC
AGTCACTTCATCCTGAAGGAGCGAAGCAAATTTACTGGAAAGCTGCTGGCGCTGGCCGTT
GCTGCCGACGAGACAGTGAGTGCAGCGCGCGAGAATGGATTCAGGAGCACCTTTAACAAG
GAGTCGCTTGGAGTTGCCATTGCCGACCAAGACAGACATGCTCTTCCGGTCACGCGAAAA
CTCGTAGACGGAGATTTTAGGAGCCTTCTCTTCGTAGCGCTTGCTGATGTAGTGGAGTCT
AGAGTTCGGTGTCAGATTGGCGCGCTCAGAGTTGTACGCAGCGTCAGTAGTGCCAATCTT
CTCAACCAAAGATCTCAAAGCACCCTCTGTAGGCTCGCCGACATTGTTGAATGTGCGGTG
CTGGCTATCGTATGACAGGGTCGCTCCGTTACAGATGGCGGCAACTTCAGTCATTTGCGC
GACAGTTGGAGAGCTGGCAGCTGGGTGCTCGATCGTCTTGCCATGCTTGGAGACAGCACC
TTCAGGCGCGAAGCTCGTGCCCTCGACGTCCATCTCCTCCAGTCCAGTTCCAGCTTCGTT
GACATGAACAACCTTGCTGACACTCATCATGTTTGTGGTGAGGGTACCTGTCTTGTCCGA
GCAAATGACACTGCAGCTTCCGAGAGTTTCGACGGAGGGCAACGAGCGAACGATGGCATT
CTTGGCGGCCATCTTCCGCGTACCAAGCGCTAAGCAGGTCGTGATGACAACGGCAAGACC
TTCCGGAATGGCGGCCACGCCAAGGGAGACGGCGATCTTTAGGTAGTAGATCGCACCTTT
TGTCCAGGATCCGCCGAAAGAGGGGTCGCTGAAGTGCTGGATGTTGATCAACCATACCAG
GATGCAGATAGCACTGATGACTTTGGCGAGCATGTCACCGAAGTCGTTCAGCTTCTCCTT
GAGCGGTGTTGGCTGAGAGATTTGTGCCGTAATGCTTTCGTGAATATCTCCAATGGCCGT
GTTAGAGCCGGTCAAGACCACGACTGCGTGAGCGGTACCAGTCACGACGGTCGTTCCAGA
GAACAGCATGTTGGTCTGATCCTGCTTGACCGCTTGTGCGTCCTTGATAGCCTGCACATC
CTTGCCAACACTTTCACTTTCGCCAGTCAAGCGGAAGCTGTTGCTGTGTATGCTGAGGAC
TCGGCAGTCTGCCGGGATTCTGTCGCCCACTGCCACATGTACCACATCTCCCGGCACAAG
CTCCTCCGCCTTGACTTCGGAGAGCCGACCGTTCCTGACAACCTTTGCCTTGTTCGCACT
GTATTCCTGAAGAGCTGCAATGGCCTTTTCCGCCGAGGATTCCTGACTAACACCGACGAT
CGCGTTAAGAACCAGGATTGTCAAGATGACGATCGGGTCGACGAAGGCAGTCCAGCCCTC
CTCCTCTTCAAACAGGGCAAGGACGAATGATATGGCAGCCGAGGCCAGGAGGATGATGAC
TAGTTGATCTTTGAACT
>MATOU-v1_1343095
GTCGTCCTTGCTACGACCACGAAAGGATATGCTACCGGAATTCTTGGCGATTCGTGGACT
CTTACGGAATCTGAGCTTGCCGTGGGTATTGGATTCGCGCCCTGGAGACCTGACGGCGAT
AGTGGGACTGGCGAAAGCGTAACCTCGCTGTCTTCCTCGACCCAGTCCATGCTTCGCGAG
ATTGCGATGTCTGAGCTATCTCAGAATTTCAGCGAACAGGCAAATCAAGGAAGTCTCTAC
TTAAGGAAGTCTCTACTTTGACGGCAAAGCTTTGGCCAAGTTTGCAACGATCTGCTACGC
GGCAAATGACTTAGCAGATGACATGGCCCTCTCGCAGTCTGGTCTGGTCAAGTTGAAGGA
ATTTTTCGCTCTTCACGTTGACAACCAGATGGAATGGCCGTTGGTCTACGACGAAATTTG
GGGCGGCGTTGTCAGCTCCCAGGCATACTCCACTGGCGATGCCAATGCTGATTTCGGCAA
TGCCATCTACAACGACCACCACTTCCATTTCGGCTATTTTGTCTATACTGCTGCTGTCAT
AGCGTATCTTGACCCAGAATGGAAGAACGACCAACAGAATGTCGACTGGGTCAACATGCT
CGTTAGAGACTATGCAAACTCGATCCCGGATGACCCTTACTTCCCGATGCAGCGCAACTT
CGACTGGTACCATGGTCACAGCTGGGCTCACGGCTTAACCCAAGTGGACGACGGGAAAGA
CCAAGAAAGCTCAAGCGAAGATACCATGGCCAGCTATGCAATCAAAATGTGGGGTCAAGC
CATCGGCGACGAGAACATGGAGGCTCGCGGCAACTTGATGCTCGCCGTCCAACGGCGCAG
CTTGAACGACTACTACCTTTACGCGGACGACAATAGTGTCCAACCAGCAAGGTACACCGG
CAATCGTGCAGCTGGCATCTTGTTCGAAAACAAGGTCGACCACACCACCTACTTTGGTGC
GCTGCCGGAATACATCCAGGGCATCCACATGTTGCCGTTGCTACCACACACCCCCTACAT
CCGCCAGCAGACCTTCGTCCAGCAGGAGTGGAACGATTACTTTAGTGACTCGGGCCTGGT
ACCTGCGACGAGTATCTCTGGCGGATGGCGTGGGATTGTGGAAGGCAACCGCGCAACGAT
CGACCCTGTGTTTGCTTATGACTTCTTCAGCAACGCCTCAGGTGACTTCAGGGCCGAGTA
TCTGGATGGCGGTGCTAGCCAGACCTGGTACTTGGCGTACGCTGCAGCACTTGGTGGCGA
CGCTGGCGCTAACACGATAGTCCGAAGGGACGACCTGACTCTAGACGATCGAAGCGCTCA
GGCTTCCGGCGTCGACGGAGTCAAGAGTTCAGGTAAGAACTTTCTTGGGAGGAGATCGAG
GTTTGGAAGCTCGCGATCGTCCAGGCTGCGGCAGCGGACGAGTGGATAGGTAAGAACGGT
TTTTGGGTGTCATTTTTCACTCGCTTGGGAAGGGAAATGGATAGGTATATTTGGCGTTTG
GAAAGGCATGTTTTGTACAGGGTTTAGGAGACGGCGTTCATGAGGAATCGGGACGATTGA
TGCCCGTGGACGACAAAGTCATGACTATGTTCATGGCGGTGTTATGCCGTCCATGAAGAT
GATACGATACCCTTATATAACATGAATAGACTGCACATGCTTAATCCAATATGCTTACAC
>MATOU-v1_1343773
GTCTTCAGCAGCACACCAAGTCTTGCTGCCACTAAACGATGGCTAAGGGGAGACATGTCC
AATTTTGCCTACCTGATGCTCATCAACACGATGGCTGGTCGAACTTTTAACGACCTTACC
CAATATCCCGTATTCCCATGGGTCTTGGCTGACTACACAAGCGACGAGCTTGATCTGGAG
GACCCCAGGACGTTCCGTGATCTTTCCAAGCCTATGGGCTGCCAGAGTCTTGCAAGGGCT
GCAGAGTACCAAGACCGCTATAGACAATTTGCAGAACTGGAGGACTCCTCGGCACCACCG
TTCCATTACGGTACACATTACTCCTCCGCGATGATTGTGTCATCCTATCTTATTCGCTTG
CCTCCCTATGTGCAGTCCTACCTGCTCCTTCAAGGTGGCAGTTTTGATCACGCCGACAGA
CTCTTCGACTCCATTGGTAGAGCCTGGGCTTCGGCATCGAGAGAGACGATGAGCGATGTG
AGAGAGTTGACGCCCGAGTTCTTCTATCTGCCGGAATTCCTCATAAACGTGAACAACTAC
GACTTTGGTCTTAAGCAGGGAAGCGGTGGAGCAGTGAACGACGTTCAGCTTCCCCCTTGG
GCTAAGGGTGATCCACATATCTTCATCGCAAAGCATCGTGAGGCACTCGAGTGTCCATAT
GTGAGCGAGCGTCTACACATGTGGATTGACCTCGTATTCGGATGGAAGCAGCGCGGCGAG
GCTGCTGTTGAAGCAACGAATGTGTTCCAACACTTATCATACCACGGATCAAAGGATTTG
GACACTATTACAGACCCAGTCGAGCGTCTTGCAACCATTGGCATCATCCATTCTTTCGGT
CAGACACCACATCAGGTCTTCCAGCGGCCCCATCCTGCAAGAGAGCTGGCCAAGAGCCAC
GTCTCTAGGCTTGATACCGTTGTTGAATCACTCACGAGACTCCCTGAGCCTTTATTCCAG
AGTGATGAGAGGGTGGCCGGGCTCGCATTCACACAAGGAATGAGTCGCTTGCTGTGCGAC
GGGCCGCGCAAGTTGAATCTACCTCCTAATTGCGATCGCTTTGTGCAATGGGGCTTTGCT
GATCATAGCTTGCGGTTCTTCTCGTCAAACACCAAACGCCCGCTTGGGCTCTACGAGAAT
GCCCATGTTGGAGCCGTGACCTCTGCCTTGTTCGCTGACAGGAAGACGCTTATCACTGCT
GGCGCGGACTGCACTATCGGCGTTTGGTCCGTCCATCCAAGCCGCGATGTTATAGATTTG
CATCCCACGGTATATCTCTTTGGACACCGCTCGAAAATCACCGGACTCACTGCAAGCCGT
GTCTTCAGTACCCTCGTCTCTACCTCGGACGATGGACAGATCTTATTGTGGGGTCTCAAC
AGGCTCAATTGCATTCGTACTCTGCACCACGCTGGCGATTCCACTGTCCAAGCCGTGGCA
ATCAGCGATGTCTCTGGCCACATCGCCCTCTGCCAAGGGCCATACGTCCTGCTATACACC
CTCAATGGACACTTGCTGCTGCGACAAAAGGTCTGCGACTCTGTGGACGACGAGATGACA
TGCTGTTCGTTCTACAGCGGGGCGGGCAACGAATGGCTTGAGCGGGAGCTACTTTTCACG
GGGCACGCACGGGGAGTGGCGAACGTGTGGGCGTTGACCACGTTGTCGGATGGGGGATGG
CACCTGTCGCTTGTCAAGCGACTGAATCATGTCGATGCCAATCGGGAGGACGGTGGTAAT
ACGTTTGCGGCGGTCACTGCCATTCTGCCAACTGCACAGGCTGTTTATACAGGTGACGAA
AGCGGGAGGGTGTGGGAGTGGGACTGCATCCAGAGACAAGGCAGTCTTAGTGTGCGAGTG
AGATAGGAGATCCGTAGTTCTCTATTCTAATACTGTAAATGAGAAATCAAAGATGA
>MATOU-v1_1345288
CAGCAGCATACGCATCGCACGCAGTCTGCAATGTCGGCATAATGACAGGCGCGAACAAGC
CCGAGTGGTTGATGGGTATCTTCTCATTCAGCGTGCCTTCCGTCTCACATTGATCCCACA
GACTGTGATCCACACCCCCATACATGAAGAAGCAACATGGCTTCCCCTGCGAAGTACCGA
GGATGCTGAAATCCTCGCTTCCACACAACTTGCCACATTCAGATGTGTATGCATGCTTTC
CTTCTCCGAAATGCGCCTTGAAACTCCCTTCGAGCTTCTCCGTGACGCTATCGTCGTTGA
GCGTGAGAGGGAAGTTCCGCGTGATGTGGAAAGTCGGTTCCTTGACGGCATTGCTCGCGA
GACACTCCGCTTTAACAATACGCTGGATACTCGCCATCACCTTCTCCCTCGCCTGGGGGT
TCGTAGCGCGGACATCGATAGCGATCCTCGCATCGTCTACGACAACATTCTCAGCATCGC
CCACTTGAATCGACGCCACTGTGACGACTGCCGTATCCCACGGATCGACTTCGCGGGAGA
CGATAGTCTGCAACTTCATCACAACACCCGCGGCCATAACGACGGGATCGATCAGCCGGT
CCGGCATACTCGCGTGCCCACCGCGTCCGTGCAGCGTGACGCGCATCGAGTCTGCAGAAG
TCGCTACTAACCCTCTCCGGGACCCGATGACTCCAGACCGCCACGGGACGACGTGGCCAC
CCAGACAGATATCGGGAACGGGCACGCCATGCTTCTTCGGATCGTACATCCCATCGTCCA
CCATCGCCTGTGCACCCGTGCCCCGCTCCTCTGCAGGCTGGAAAGCAAGCAGTAGAGTCC
CCGACCAGCTAGCCTTGGCGGAAACCAATGTCTCCGCCGCGGCAAGTAAGGAGGAAATAT
GCATGTCATGGCCGCAGGCATGCATCACTGGTTTCTCAACCCCGTCGGCATCTCGCATGC
GTTTCTTCGACGCATATGGCAGACCGGTCCTTTCCTGCACAGGCAGCGCGTCGAAATCGG
CACGGAGTAAGACAGTAGGACCGGGACCGTTGTGATAGAGGGCTGCGATGCCGTGGCCGC
CGATGTTGGGGCGGATGTCGAAGTCCTGGAAGATTTTTTCCTTCAAGTGCTTGCAGATTG
TGGCGGCGGTTTCTTTCTCTTGGTTGGAAAGTTCCGGGTTGGCGTGGAAGTGTTTGTATA
GTTCCTGGTACGAGTCGAGGTTTGGTCGATGGTTTTGGACTAATTCTGAAATGGCTGACA
TGGTGGAAATGA
>MATOU-v1_1345623
CCGCCTACCACTTTCTACTCGGTTCTCTCGATCTAGCATTCACCCTGTTCTCCAACTCTA
GTCATCTAGCTCTCTTCCATCTTCTTCTCACTTCTCGACCCTCGATCTACCTTCTAGATC
CCATAATCCTAGCTTCCCTTTCCACAACCGTAGTCCAGACGATCCATTCGTCCCGTGACA
GGGGGTTTCACCgggggggTCTCTTTCCATCTTTTCACGAGAAATCCAGACACAGCATGA
CATTCCTTCCCACGAAGATACGCGGACGGACAAAAACGCCTATCCTACTCAAAAACGCCT
ATCCTACTGTTCCGAAGGCGGCAAGGGTTCCACATTCCAAATCGTCTCAGCATACTCCTC
AACACACCGATCACTACTAAACCAACCCATCCGACTGACACTCGTAATCGTCTTGGTCAA
CCACGTCTCCTGATCGCGATACGCGTCGTCGATCAAGCGGTGGGTATCGAGATAGCTCTT
GAAGTCGTCCGAGACGAGGTAGTAATCGCCATGGTCGACGATGGAGTCGACGAGGGCGGA
GAATTGGCCGGCGTCGCCGAAGGTTCCCGCGCGGATGGCGTGGAAGACGCGGGTTAGTTG
GGGGTCAAGTTGAAAGTCGCCGTAGAAGTGGTGGTGGCGGAGTTCGTCGACGTCTTCGGA
CAGGTTGCCGAAGAGGAAGATGTTGTCTTCGCCTACTTCGCGGGTGATCTCAATATTGGC
GCCATCGCAGGTCCCAATAATCAACCCCCCGTTCAAGACGAACTTCATATTCGATGTCCC
CGACGCTTCGGTCCCAGCAGTGGAAATATGCTCGCTGATATCGCTCGCGGGGACGATGAT
CTCCGCTTTGCTGACATTGTAGTCCTCCAGGAAGACGACCTTCAGCAGATCGCCGATATC
AGGATCATTATTCACCACCCTGCCCACAGCATTAATCAGATGAATAACCGTCTTCGCCAT
CCAATACCCCGGTGCCGCCTTGCCCCCAAAAAAGCTCACACGGGGTTGAACCTTCGTCCT
CTCCTCAGCCTCCATGCCCTTCAACTCCAAATACCGATGGATAACCCCGAAGATATTCAG
CTGCTGGCGCTTATACTCATGCATGCGCTTCACCTGGATATCGAACAGACTGGCCGGGTT
GACGGCGATGCCGTGGACGTACTTGGTATACTTCGCTAGGCGGAGCTTGTTCGCGTATTT
GATCTCTTGGAACTCCTTCCGGAAGGCAGGGTCGTGGACGAAAGATTCGAGGTTGTGGAG
CTGGGTCAGGTCGCGGAGGTAGTCGTAGCCGCCGAGTTTGGAGGCGATGAGTTCGGAGAG
GCGCGGGTTGGCTTGGTGCAGCCAGCGCCGGGGCGTGATGCCGTTGGTGACGTTGATAAA
GCGGTCGGGACCGTAGACTTTGACGAAGTCCTTGAAGATTGTGGTTTTGATTAGGTCCGA
GTGGAGTTCGGCGACGCCGTTGACTTTGTGGCTGCCGATGATGGCCAGGTGGGCCATGCG
GATCATTTTGGGTTGGCTTTCTTCGATGATGCTGGTGCGGCCGAGCATCTCGCGGTCTTT
GGGGAAGTTGCGCTCGACGTATTGCAGGAATTGGAGGTTGATATCGTAGATGATCTGGAG
GTGTCGAGGCAAGAGATGTTGGATGAGTGGGACGGACCATTTCTCCAGTGCTTCGGGGAG
AACGGTGTGGTTGGTATATCCGAATGTCTTTTGCACAATGCTCCAGGCTTCATCCCACTC
TAGACCTTCGTGGTCGATGAGAATACGCTGAAGCTCAGGGATGGCGAGTGTCGGATGAGT
GTCGTTAAGCTGGATGGCAACCTGATTCGGAAACTCCTTCCACGCCTTCTTAGACTTCTT
GAACCGCCTAACGATATCATACAACGAAGCCGCACACCAGAAATACTGCTGCTTCAGGCG
CAACTCTTTGCCCCGCTCCAGACTATCATTGGGATACAAAACGGCCGAGATAGTCTCGGC
ACGCTGCTGATCCGCGACCGAAGCCTCATACTCGCCGGAGTTGAACTTGGTGAAATCGAA
CTCGCCATGGCTCGCCTTGCTACTCCAGAGACGCAGATTATTCGTCGTCTTGGTCCCGTA
GCCGGGGACCGGGGCATCGTACGCTGTAGCTGTGACAATCTCTCCGTTCTCCCAGATTGA
AACTGACTTGCCCGTGCTTTCATCTGTATGCTTTCTCACGTTGCCATAGAACTGCACG
>MATOU-v1_1346056
ATCCACTCAAGCTTTTGCCACCGTGCTCTTTCCTCTCACTTCTCCATCAGCCACGTCAAA
GCACCAGCAGCATAAGCATCACACGCAGTCTGCAATGTCGGCATGATGACAGGCGCAAAT
AGGCCGGAGTGGTTGATGGGTATCTTCTCATTCAGCGTCCCTTCCGTCTCACATTGATCC
CACAAGTTGTGATCCACACCCCCGTACATGAAGAAGCAACATGGCTTCCTCTGCGAAGTG
CCGAGAATGCTAAAATCCTCGCTTCCGCACAGCTTGCCACATTCAGATGTGTAAGCGTGC
TTGCCCTCTCCAAAATGCGCCTTGAAACTGCCTTCGAGCTTCTCCGTGACGCTATCGTCG
TTGACAGTAAGAGGGAAGTTTCGCGTGATCTGGAACGTCGGCTCCTTAACGGCGTTGCTC
GCCATACACTCCGCTTTCACAATCCGCTGGATACTCGCCATGACCTTCTCCCTTGCTTGA
GGGTTCGTAGCCCGCACATCGATAGCGATCCTCGCATCGTCCACGACAACATTCTCAGCA
TCTCCCGCTTGGATCGAGGCCACTGTGACCACCGCCGTATCCCACGGATCGACCTCGCGG
GAGACAATGGTCTGCAACTTCATCACGACACCCGCGGCCATGACGACGGGATCGATCAGT
CGGTCCGGCATACTCGCATGCCCGCCGCGTCCATGCAACGTAACGCGCATCGAGTCCGCA
GACGTAGCCACCAACCCTCTCCGGGACCCAACCACTCCAGATCGCCAGGGAACAACATGG
CCGCCGAGACAGATATCGGGGACGGGCACAGCATGCTTCTTCGGATCGTACATCCCATCA
TCCACCATCGCCTGCGCACCCGTACCCCGCTCCTCCGCAGGTTGGAAAGCGAGGAGTAGA
GTCCCCGACCAGCTGTCCCTAGCCGAGACCAACGTCTCCGCCGCGGCGAGCAGGGAGGAA
ATGTGCATGTCGTGCCCGCAGGCATGCATCACAGGCTTCTCCACCCCGTCGGCATCCTGC
ATACGCTTCTTCGACGCATACGGGAGGTTAGTTCTTTCCTGCACAGGGAGAGCGTCGAAA
TCGGCACGGAGTAAGATGGTAGGACCGGGACCGTTGTGATAGAGCGCCGCGATGCCGTGG
CCGCCGATGTTAGGCCGGATGTCGAAGTCTGGGGAGATGGTTTCCTTCAGGTGCTTGCAG
ATCGTGGCTGCGGTTTCTTTCTCCTGGTTGGAAAATTCCGGGTTGGCGTGGAAGTGTTTG
TATAGCTCCTGATACGAGTCGAGGTTTGGTCGATGCTTCTGGACTAAGTCCGAGATGGCG
GACATGGTGAGGGTGAGCAGTGCTCACAAACAAGGAAACAAAAATTTGGCACTGTGTTTA
tttttttCCTAATGGCTTTGAGGTTCGCGATACTTGGCCGAAGAGCG
>MATOU-v1_1348626
CAATGGCGCCCGGAATTCTCAAAGCGGCAGTCCAATGAGACATCCTGGCCGTATGGACCA
CTCTCCACCCGCGGTCGCGACATTGTCAACACCAAGGGCGATGTAATCACTTGGGCTGGT
GTTAACTGGCCGGGGAGTGGCGAGACCATGGTACCTGAAGGCCTGGAATGGTCCAGTGTC
GACGAAATCCTTGACATGATTCAGAGCGTCGGCTTCAATTTCATCCGTCTGACGTACGCC
GTTGAAATGGTAGATCAGATCTATGCGAGCGATGGGGATGATGTCCCGCTTGATATTGCC
ATGATCAACGGCCTGGGCTATGCGAATGGAACGAAGGTCACCCGAGAAATGGTGACGAAG
AATCCGGGCTGGACCAAGGACACGACTAGATTCGAAGTTTGGGACGCTATTGCAGAGGCC
GCTGCTAAGAGACAAATCTATGTTCACCCAGATGTCCATGTCGGGAAGGCTCAATGGTGT
TGCAATAATACCGACGGAAACGCCTGGTTCGACGACTACAACTTCCCGGTCGACAACTGG
CACCGTGCGCTGAGATACGTCGCCGACTGGGCCAAGGGCCATGAGAACGTCGTCTCGATG
TCGTTGAGGAATGAGCTGGTCTCGATGTCGTTGAGGAATGAGCTGCGTCGACCCATCAAC
GTCTCCGCGCCAACAGAGACCTATGGCTACAATTGGGTGTCTCTAGTCGGCAACTTAACG
GCCGCGACGGATGCTATCTACGATGTGAATCCCGATATCCTCATTACCTGGTCAGGCATG
CAATATGACCAAGATCTCTCAGCACTGACTACCGGCCTCAACCTCAACACTGCACCGTGC
TACAAATGCGACGCTATTCGGGATGCTTACCGACGCGACCCTATCGTCTTCGATCTGGGA
GCACATCCGTGGGCTGACAAGGTCGTTTACGTACTGCACTTGTACGCCATGTCCGAGAAT
CTCGACACGGGAAGCTGTCCTATCGTCAAAGCCGAGTTTTACCAGAAAGGCTTCAACGCG
CTCGGCATCGACAAACCTGGCGCTTGCAACCGTACTGGTGGATGCACCGAAGCAGTGCGC
CAGACACCAGTTATCCTGAGCGAGTTTGGTTCCGCGCAGGATCAGACGTTGTTTAACGAT
ACTTTACAGACTTGCCTCCGCGAGTTCACCACCGAGCACAATGTCAGCTGGGCAATGTGG
AGTTTGGCAGGGTCGTATCGGATTCGGTCGGGAGCACAGGGTGTGCCGGATACGTGGGCT
TTGACAAACTATGAGTGGGACGGCTGGGCTTTCAAGCAAGGTATCGAGAAGTGGTGGAAG
CCTTGGGTGGCGAAGATGCTCGGTGGTTCATAGATTGATTCAGAAGGAAGTGGCAGATGG
CATGCGCCGTCCCGCGTTGGGTACCGACATCAT
>MATOU-v1_1349473
CATCGAATGGAACCGTACGCAGCAGCAGCAAACTTTCGCGGACCAGAAACGGGTCTACTA
CCTCTCCCTGGAATTCCTCATGGGCAGAGCGCTGGACAACGCCATGCTAAACGTAGGCAT
GAAGGACATTGCCAGGGAGGGACTCGGCGACCTGGGCTTCCGCATGGAGGATGTCATCTC
TCAAGAACGCGACGCCGCGCTCGGTAATGGTGGCCTCGGCCGTCTCGCCGCCTGCTTCCT
CGACTCCCTCGCCACCCTGAACTATCCCGCCTGGGGCTACGCGCTCCGCTACAAATACGG
CATCTTCCGCCAGGAGATCGTCGATGGCTATCAGGTCGAAGTCCCGGACTACTGGCTCGA
TTTCAACCCCTGGGAGTTCCCTCGTCACGATGTCACTGTCGATGTGCAGTTCTGCGGGAA
CGTGAGGAAGCATACAGATGAGAGCACAGGAAAGTCAGTTTCAGTCTGGGAAAATGGGGA
GATCGTCACGGCTACAGCATACGATGCCCCAGTTCCCGGCTACGGGACCAAGACGACAAA
TAATCTGCGTCTCTGGAGCAGCAAGGCGAGCCATGGCGAGTTCGATTTTACGAAGTTCAA
CTCCGGCGAGTATGAGGCTTCGGTCGCCGATCAGCAGCGTGCCGAGACTATCTCGGCCGT
GTTGTACCCCAACGATAGTCTGGAGCGGGGCAAGGAGTTGCGGCTGAAGCAGCAGTATTT
CTGGTGTGCGGCTTCGCTGTATGATATTGTCAGGCGGTTCAAGAAGTCTAAGAAGGCGTG
GAAGGAGTTTCCGAATCAGGAAGGCGTGGAAGGAGTTTCCGAATCAGGTTGCCATCCAGC
TTAACGACACACATCCGACGCTTGCCATCCCTGAACTTCAGCGCATCCTCATCGACCATG
AAGGTCTAGAGTGGGATGAAGCTTGGAACATTGTCCAAAAGACATTCGGATACACAAACC
ACACCGTTCTCCCCGAAGCATTGGAGAAATGGTCTGTCCCACTCATCCAGCACCTCCTGC
CGAGACACCTCCAGATCATCTACGACATCAACCTCCAATTCCTCCAATACGTCGAGCGCA
ACTTCCCCAAAGACCGCGAAATGCTCAGCCGCACCAGCATCATTGAAGAAAGCCAACCCA
AAATGATCCGCATGGCCCACCTCGCCATCATCGGCAGCCACAAGGTCAACGGCGTCGCCG
AACTCCACTCGGACCTGATCAAAACCACCATCTTCAAGGACTTCGTCAAAGTCTACGGCC
CCGACCGCTTCATCAACGTCACCAACGGCATCACCCCGCGCCGCTGGCTACACCAAGCTA
ACCCGCGCCTCTCCGAGCTCATCGCCTCCAAGCTCGGCGGCTACGACTACCTCCGCGACC
TGACCCAGCTCCACAAACTCGAATCTTTCGTCAACGACTCTTCCTTCCGGAAGGAATTCC
AGGAGATCAAATACGCCAACAAGCTCCGCCTGGCCAAGTATACCAAGGACGTCCACGGCA
TCGCCGTCAACCCGGCCAGTCTGTTCGATATCCAGGTCAAGCGTATGCATGAGTATAAAC
GCCAGCAGCTGAATATTTTCGGCGTCATCCATCGCTATCTGGAGTTGAAGGCCATGTCGG
TCGAGGAAAGGGAGAGAGTTCAACCCCGGGTGAGtttttttGGTGGCAAGGCTGCCCCGG
GTTATTGGATGGCGAAGACGGTGATTCATCTTGTTAATGCTGTGGGGAGGGTGGTTAATA
ATGATCCTGATATCGGAGACTTGCTGAAGGTCGTCTTCTTGGAGGACTACAACGTCAGTA
AAGCGGAGATCATTGTCCCCGCTAGCGATATCAGCGAGCATATCTCCACTGCGGGGACTG
AAGCGTCGGGGACATCGAATATGAAGTTCGTCTTGAACGGCGGTCTGATTATTGGCACCT
GCGATGGCGCGAATATCGAAATCACCCGCGAAATAGGCGAAGACAACATCTTCCTCTTCG
GCAACCTCTCCGAAGACGTCGACGACCTCCGCCACCACCACTTCTACGGCGACTTCCACC
TCGACCCCCAACT
>MATOU-v1_1355962
ACTCTCAGTGGGTCTCGATTGTTCCATATACGCTATCGAACAGCTGGACATACTCTCACG
AAGTAAAGAAGACCACCAAAAATCCCACCCAGCTACCCACCACTCCAATCGCAGAGTAGG
AGCTAATGAACATGAGCGGTAAGAACTCCAACTTCGCTCCGAAGATCATTTGATGGAACA
GCGAGCAGTATGCGATCAGCGGAATGGCCACCGCAATATAGAGCAGTGAAAAGCGGTCCA
GGAGGAAGACTCGAGGCTTCTCAGATGCAGGCGCCAGTCGATCAAACGCTAGTAAAAGCA
CCACCAGCCATAGAATAGTGTACACAACTTTGATCGGGAACTCCACTGCTGTAAAGAGGA
GCGGGAACAAGCTCACGTGACCACTCACGGCCAGAGGTCGAAATGCGCCAAGATATCGCC
GATCTTTCAAAGCCAGCAAGCTAAATGGAATAATGACGAGCAAAATCGCTTTCTCATGGA
CGTGCCAGCCAAACAAAAAGGAGGCGTAAGCACATAGAGTGATTGTGCCGACGAAGTTGT
CCCAAGTGGCGGCGAAGAAGAGTTTAGCGAGAGCCGGAATTTGCGCCGCTAAGGTCAGAA
TGAAAGTCATTCGCGGACTTATATCCGGCAGTACCGCAAAAGCCGTGTCTCCTACCAGGC
CTCTTGTGACGCTATGGACCGCATCAATGTTTACCGGCAACTTCAAATACGGTGCAGCGT
AGATCAGCACCCGATCTGTAAACGAGTACATAGCCCACACATTGGGAGCCCAATATGCAT
GGCAAAGGCCTCTTGAAAAGGGGAATAACCTGCTCAGCAGCTGTGGCATCTGTTCGTAGT
AGACAAAGGGTCCGAATGCAAGGACAGCAACGCTAACAATCCCGAGCCCCAGCTTGACAC
AATTGGCGAACTTGATGTTGAAAATCGATCTCGGTCCAAGACAGTATGCTCGCAGCAAGT
AGACAAAGTACGCCGGGGCCAAGTAAAGGTAGATGTGCTTCAGACAAAGTAAAGCGGCGA
ACATTATGCCGCTCGTCAATAGCCCGGACGGACGGCGAGCCTGGACAATGGACAGGATGA
GGATGCCGTACAAGAACCCATTGTACTGGAAGTGGATGTGGTCGATGATGAGAAGACCCG
GCGACAGCAGAATCGATAGAGCCGAAGCGTGTGCTTGCTTTTTGGCTCCCAGCGGCGTTG
ACTTGATGAACTGGTGCAGAGCAAAGACGAGCACCAGCTCAGTGAGAATCACCGTAGCGC
GCTGGAATTGGACCGTCTGCCAGCTATCATATCCGAGGTTACTAACCTCGAGCATGCCTC
TGTCGACATACTGCGCCGCTTGCGAGAGCAGCCATTCGAAGTACGCAAAGAATGGCGGGT
AGTCTAGTGTCCACTCGGAGGTCTTCTCGTAGTACCATTCCTTTAGGGGTAAGGAGTGAG
TGATGGCCAGCCAGTTTCGGTGGACTTCGAAGTCCGTGGATCTGTATGCAGGCCAGAGTA
AGACCTTCAGCGACGTGGCAGCTACCGCACTTTGCAGCAGCGTCGGATATTGTTCAGCCA
TGGCGGAAGAAAGTTGGGGTTGGTGACACAGTGGCGGAAGGAGGAACACAGTGTCAGAGA
GGACTGATGCACGTCAATTTCATCGCTAATCGCCAGACCGCATTTCGAAGGATCAATGGT
CCCCATGT
>MATOU-v1_1361982
TCAACCCAGGATACCTACTACGCCAATCTTCGCCGCAAGAATGGTCGCGAAGAGCCATAC
AACGTGAAATACTGGGCACTCGGCAACGAGACATGGGGCCCGTGGCAAGTGGAGCAGATG
ACAAAGGAAGACTATGCCAAGAAGGCCTACCAATGGGCGAAAGCTATCAAGCTCCTAGAC
CCTAACGTTGTCCTAATTCTCTGCGGCGAGACAGGTCACAGCAGCTGGGATCACCACGTC
CTCAAAGAATGTGTCAGATTCGATACCCACTCTCTGGGAGGTAGCACGACCGCCTCACTC
ATCGACATGCACTCTATTCACATCTACACCGCCTGCAACAAAGACCCCGTGAAGAATGCC
TTCGCTCCTCTCTCGGCTGAGCGGGCGATTGAGATTTGCGCCGGTCTGATCGATCTTGCG
CGTATTGAGAACGGCGTGCCCGCTTCTGTGCCGCGTCAGACCATCTGCTTTGACGAATGG
AATGTCTGGGATCCTATGCGGGCACCAGGCGAGTCGGGTGCAGAGGAGAAATATAATCTC
TCTGACGGCTTGGCCGTAGCCATCTGGCTGAACGTCTTCGTCAGGCAGAGCAAATATGTC
GGCATGGCGAATATTGCACAGTCCGTGAACGTCATCAGTCCTCTGATGACACACAAAGAC
GGCATCATGAAGCAGACGATCTGGTGGCCAGTGCTGCTTTTCTGCAAGTACATGCGCGGC
TGGGTCGTCGGGAGCCATGTCAGCTGCGAGGAGTACGGCGGAGCAACCGAACCGCAATGG
ATCCAAGCTGCCAAAGAGACACCGTGGTTGGATGTGAGTGCTACGATCCTGGTGGTTATC
AACGTCAACCCTGAGAAGGACTTTGAGATCGAGGTGGAGGGTGTGCAGCCAAAGGCTGGA
AGCGTTAAGAGACATTTGATCACTGGTAAGAGTTGGGATGTGATCAACAAGAATGACAAG
CAGGAGGTCGGTATTGAAGAGAGCGAGTGGGATGGCAAGGGCAAGACAGTGTTCCCGAAG
CGTAGCATGGTGATGCTTAGGTGGCAGAGCTAAACTCTTCCGCTTGCTCCTCCATGCGGT
ACTGAAAGTACATAAAGATAGACCAGAAAAGAATAGAAAGCTTTTTGATCTTTC
>MATOU-v1_1361983
TCAACCCAGGATACCTACTACGCCAATCTTCGCCGCAAGAATGGTCGCGAAGAGCCATAC
AACGTGAAATACTGGGCACTCGGCAACGAGACATGGGGCCCGTGGCAAGTGGAGCAGATG
ACAAAGGAAGACTATGCCAAGAAGGCCTACCAATGGGCGAAAGCTATCAAGCTCCTAGAC
CCTAACGTTGTCCTAATTCTCTGCGGCGAGACAGGTCACAGCAGCTGGGATCACCACGTC
CTCAAAGAATGTGTCAGATTCGATACCCACTCTCTGGGAGGTAGCACGACCGCCTCACTC
ATCGACATGCACTCTATTCACATCTACACCGCCTGCAACAAAGACCCCGTGAAGAATGCC
TTCGCTCCTCTCTCGGCTGAGCGGGCGATTGAGATTTGCGCCGGTCTGATCGATCTTGCG
CGTATTGAGAACGGCGTGCCCGCTTCTGTGCCGCGTCAGACCATCTGCTTTGACGAATGG
AATGTCTGGGATCCTATGCGGGCACCAGGCGAGTCGGGTGCAGAGGAGAAATATAATCTC
TCTGACGGCTTGGCCGTAGCCATCTGGCTGAACGTCTTCGTCAGGCAGAGCAAATATGTC
GGCATGGCGAATATTGCACAGTCCGTGAACGTCATCAGTCCTCTGATGACACACAAAGAC
GGCATCATGAAGCAGACGATCTGGTGGCCAGTGCTGCTTTTCTGCAAGTACATGCGCGGC
TGGGTCGTCGGGAGCCATGTCAGCTGCGAGGAGTACGGCGGAGCAACCGAACCGCAATGG
ATCCAAGCTGCCAAAGAGACACCGTGGTTGGATGTGAGTGCTACGATCAACGAGGAGGGT
GTGGTCAGCTTGGTGGTTATCAACGTCAACCCCGAGAAGGATTTTGAGATCGAGGTTGAG
GGTGTGCAGCCGAAGGCTGGAAGTGTGAAGAGGCACGAGGTTGAGGGTGTGCAGCCGAAG
GCTGGAAGTGTGAAGAGGCATCTGATCACAGGGAAGAATTGGGATGTGGTCAACACGAAT
GATAAGCAGGAGGTCGGTATCGAAGAGAGCGAGTGGGACGGCAAGGGCAAGACTGTGTTC
CCTAAGCGGAGCATGGTGATGCTTAGGTGGCAGAGCTAAATGCCTTCCGCTTGCTCTTCA
ACGCGGTGCTGAGACCACTTAAAGATAGACCAGAACAGAATAGAAGGCCTTTTAATCGAT
AA
>MATOU-v1_1362001
AGCTTGGTTGCACGAAGCAGTAAAGATGATATTATCTACTTGTTGACATTACATAAAAGG
TCATATCACTCGTTTCTCATCCGCCAGAGAAATTCAAGCATCAACAACGGTCGCAGTGCC
ATCGACTCTAAAGTCGCGGCTGCTGAAGCCGACGCTGAACTTGAACTCACCCTCCGGAAT
CAGCCACTGCTGGGAGACGACGTCCCAGTAGCTGAGGTCACGCCTCATGATTTCGAAAGA
GACTTGCTTGCTCTCGCCGACGCAGAGGTACGGCTTCTCGAACCCACGAAGCTGCTGCAC
AGGAGTACCCTCAGGCGCGCTGTCGGGGAAAGCGACATACAGCTGGGCAACCTGTGCACC
ATCACGGTCGCCAGTATTGGTCACAGTCGCCGAAACGTTGTAGAGAGTCTCCCACAGAGC
GGGGTTGCCACCAGGAGCAATCGGGAGATCTTCTGGCTCGGAGGTGATGTCGGTCTGGAC
GGGCTCGATGGAAAGGTCGGAGAGCTCGAAGGTAGAGTACGAAAGACCGAATCCGAATTC
GTAGCGGACATCGATGTTCTTGGCATCGAAGTGACGGTAGTCAATTTCGAGACCTTCCTC
GAAGTACACCTGCCAGGCGTACTGGCCAGTGTTGTTGCCGACGGAGGTGACAGGCGGGGC
ATTGTAATCATCGCCATCGTAAGCGACGGTGTAGGGCAGCTTGCCGGATGGGTTGTTGAT
GCCGTAGAGGGTGTCGATCATGGACTGACCGCTTTCTGTTCCGGGGTAGTGCGCTGCAAT
GATGGCCGTGACGTTGGGGTGGTCGGCAAAGGGGTACAGGTTGATGCCAGCTGAGTGCGT
AACAACAACGGTGTTCCCACAAGCTTTGGCGACCGAGTTGACAACCGCCTCGCCGTTCCA
GTCGAAGCCCAGAGACTCGCGGTCGTCGGCCTCCTCAGCCCAAGTCTTAAGCATGACAAT
ACAGACTTCCGGCTCCGGAGCGATCCAAAGGTCAGTGACATCACTCTCAGCAATGAGGGT
GTTGTTGAGCCACTGCTGAAGGAGGGCACCGTCTTCGTAAGCCTTCCGCTTCAAAGCGTC
CAAGGGAGTATCGAGGTAAGTCAAACGACCGGTACCTGAGCCTCCACCGACGACCAAGTT
TCCGAATTCGTAGTTGTCTTGGTTATAGAAGCCCTCGGTCGGATTACCAGCATCATTGCC
GAAGATAGCAATGGAGCGAGGTGCCTTCAGCGGAAGTGCGTTGTTTGCGTTCTTCAAGAG
GACAGTAGCAGCGTTGGCATGCTTCCTGATCAGAGCGCTGTGGTTGCCACGAACATCACG
GCTGCTCTCGCCGCCAACCATAGCGCTCCAATCCTGGCGGTCCCACTGCGAGCGAGGTCC
AAAGTTGGTGTTGAGAGGGACAGAAGAAGGGTCCACGAGAGGCCAGTCTTCTTTGTCCTG
GTTAAAGAGATAGTAAGGAGTCATGATACGGTGAATCATGTCGTCGACACGGGACTCAGG
GATTGAGCCATTGCGAATGGCCGCGGAGACATTGCCACCGAAATACGATCCCGCGTCCTT
GAAGGTAAAACCGTAAGATCCTAGTCCACCAGGCATGTTCATGTCGAGACCGCCCTCCAT
GGACGCAACGCCGGAGTGAACCGCACCCCAATCGCTCATGATGTATCCCTGGAAGCCGAG
TTCGCCCTTAAGCAAGCCGTTCTGGGCCTTGGTGTTCTGGCAAGCATAAGAGCCGTTCAA
TCGCTGGTAAGAGCACATGACCGAAGCAACATTAGCCTTGACAGCGTTGGCAAAAGGCCA
CAGGTACGCCTCATGCATTGTCCTGTCATCGATGTTGCTAGAGATAGCTTCCTGGTCTTT
GGCAGTGAGACTTCCGTTCTTCGCAAAGGTCGGGTTCCTCTGGGTCTCCTGTTCATTGCC
GATATAGTGCTTGGCTGTGGCCTGGACACCTGCATCTTGGAAGCCCATGATAGTCTGGGC
CGTGGCGATACCGGTGAGGTATTGGTCAGGAGAGAAACCTTCCCAGTTACGGCCAGCATA
GCCTGATCTACCGAGAGCACCGCACACAGGGGCGAGAGCGACGTGGGCACCCTTGCCCTT
GAACTCCTTGCCCATAGCCATTCCTCTTTCATGAAGAATGTCTCTGTCCCAAGTGCATGC
AGCCGAGACACCAGCGGAGAAGACGCTTGCGTAATCAGCGTAGCGGATAGACAGAGGCCC
ATCTTGGAGGCAGAGACCGTTGAATCCCAGTCTCTCAATGGGCTGGATGTTGCCCACACA
AGGACCCTCAGCACCGGTCACCATTAGAGCCTTCTCCTCGACCGTCAGCTGGTCCACGAA
AGCCTGTGCTCGCTGGAAGGCCTCTTCCCAGCCACCGTTGCCTGTCGTGTTCGGAGACGG
CAAAACTTCAGGCGAGTTGCCGTATGGACCAAGGATAGGCCATTCAGCTGGTTGGACGAA
GCTGAAGGCATCTTGACTGCGGTCAGAAGTAGCAAAGCCGGATTGACCTGCTATCTGGGA
GACAAGCAGGGAGGCCGCCAACGCGTGGTGCTTGG
>MATOU-v1_1363229
GATTGGCAGAGCACCAGAGAAGAGGTCAAGATCGGGATCGAGAGTCCTCCCAATCCCTTC
TAATAACAGAATAGACAAGACGACATTCACGAAGTCCCCCTCGAGCCGGACGTGATGGCC
TCTGACCATGCCCAAGACCTGGTTCAGGATATCGCCAATCTTGATATTACCCAGAGCGAA
CGTCCGGCTCTTGACGCCTAGAACGAGATGTTGCATCTTCAGCGCAAACACCTCGTTGTC
AATGACGGCGCTCGGTTGTCGACACCGCTCGACCATGAGATGGCCGGCCTTGTACCCATC
GAACTCCGCTACAGCCTTGAAGAGATCAAGAAAATTCTTCCGGTTGACCTCGTTGAGCTC
GGTGACGAGTCCCGTATCGATGAAGATGAGTTGGGGTCGGAACCCTTCCTTGTCGAGCTT
CTCTAATGTCGCTGCCCATTTCTCCTTGTCGCCTTTGTAGGGCCGTAAACGCTGCACAAC
TTCTTCCGTAACGTCCATGCTTTTGTTAGGATCTGGTTTCGGTCTCCCACTCAGCGTGGG
CATGTTCTTCCCCACATCCATCTTCTGCGGCTTGTAGAAGCGCACCATGATGTTGCCAGG
ATGCAGGTCGGCGTGTATGAAGTTGTCTATCAGCAACATATGTAGAAACGCGTGGAGACC
TTCGTCTGCGATCTCTTTTTGGAAGACGCCGCCGCCGTTTTGGAGGAAATGTTCAAGTGG
TACACCTGTGGCGAATTCTTCTACGAGCACCTGCCGCGTCGTGTACTGGCTGTAAGGATA
TGGGAACCAGGCCGTGGTTCTGTTACGGAAGTTCTTTCGGAAGATGGTCAGGTTAGCGGA
CTCTATGCGCATATCGAGCTGGAGTCGCATCATCTCGCCGAATTGCTGAACCTCGTCTGG
AAAGCTGAGCCACTCCATCGTGGGTATGGCATTGATGACGTTGGCAAAGAACCCCATGAT
ACGGAGGTCGCGCCGGACGATGCGCTCGATCTTCGGATGCAGGACCTTGATAGCCACGTA
GTTGGAAGGTACTCTCGCAGGTGTACTCTTCAGCAATGGATCAACCGTCTTGTGTGCGCG
TTCCATGAGCGACTTGGGGTACTTGACGGCGTCATCGTCTAACGCTGCCAAATCTGGCTT
CAACTTCGCCTTGTATACCTGCGCAATCGCTCCAACACCTAGCGGCTTCTCTTGGAACTC
ATCAAATATATCTTCAAACTTCCTTTCAAATGCCTTCTCGATCGTCTTTTTAGTGATATC
CAAGGAATGTGCAGGCGCGTTCGAATGCAGTGCACCCATGACCGCGCAGAGTTCATTTGG
GAAGATGTCCGTTCGACTAGCCGCCCATTGTCCAAGCTTGATGAAGGCTGCACCCGCACG
CTCCATCGAGTTGACCAGGAATCCATACCACCAGAGCGTGCCACTTCGCTCGCCATCCCG
ATCCGCTTGCTT
>MATOU-v1_1363230
GATTGGCAGAGCACCAGAGAAGAGGTCAAGATCGGGATCGAGAGTCCTCCCAATCCCTTC
TAATAACAGAATAGACAAGACGACATTCACGAAGTCCCCCTCGAGCCGGACGTGATGGCC
TCTGACCATGCCCAAGACCTGGTTCAGGATATCGCCAATCTTGATATTACCCAGAGCGAA
CGTCCGGCTCTTGACGCCTAGAACGAGATGTTGCATCTTCAGCGCAAACACCTCGTTGTC
AATGACGGCGCTCGGTTGTCGACACCGCTCGACCATGAGATGGCCGGCCTTGTACCCATC
GAACTCCGCTACAGCCTTGAAGAGATCAAGAAAATTCTTCCGGTTGACCTCGTTGAGCTC
GGTGACGAGTCCCGTATCGATGAAGATGAGTTGGGGTCGGAACCCTTCCTTGTCGAGCTT
CTCTAATGTCGCTGCCCATTTCTCCTTGTCGCCTTTGTAGGGCCGTAAACGCTGCACGAC
TTCTTCCGTCACGTCCATACTTTTGTTAGGATCTGGCTTTGGTCTTCCACTGAGCGTGGG
CATATTCTTCCCGACATCCATCTTCTGCGGCTTGTAGAAGCGCACCATGATGTTGCCAGG
ATGCAGGTCGGCGTGGATGTTGCCAGGATGCAGGTCGGCGTGTATGAAGTTGTCTATCAG
CAACATATGTAGAAAAGCATGGAGACCCTCGTCTGCGATCTCTTTTTGGAAGACGCCGCC
GCCGTTCTGGAGGAAATGTTCAAGCGGTACACCTGTGGCGAATTCTTCTACAAGCACCTG
TCGCGTCGTGTACTGGCTGTAAGGATATGGGAACCAGGCCGTGGTTCTGTTACGGAAGTT
CTTTCGGAAGATGGTCAGGTTAGCGGACTCTATGCGCATATCGAGCTGGAGTCGCATCAT
CTCGCCGAATTGCTGAACCTCGTCTGGAAAGCTGAGCCACTCCATCGTGGGTATGGCATT
GATGACGTTGGCAAAGAACCCCATGATACGGAGGTCGCGCCGGACGATGCGCTCGATCTT
CGGATGCAGGACCTTGATAGCCACGTAGTTGGAAGGTACTCTCGCAGGTGTACTCTTCAG
CAATGGATCAACCGTCTTGTGTGCGCGTTCCATGAGCGACTTGGGGTACTTGACGGCGTC
ATCGTCTAACGCTGCCAAATCTGGCTTCAACTTCGCCTTGTATACCTGCGCAATCGCTCC
AACACCTAGCGGCTTCTCTTGGAACTCATCAAATATATCTTCAAACTTCCTTTCAAATGC
CTTCTCGATCGTCTTTTTAGTGATATCCAAGGAATGTGCAGGCGCGTTCGAATGCAGTGC
ACCCATGACCGCGCAGAGTTCATTTGGGAAGATGTCCGTTCGACTAGCCGCCCATTGTCC
AAGCTTGATGAAGGCTGCACCCGCACGCTCCATCGAGTTGACCAGGAATCCATACCACCA
GAGCGTGCCACTTCGCTCGCCATCCCGATCCGCTTGCTT
>MATOU-v1_1363231
TCAACACTGGCCTGCAGGAACTTCCTCGCCTCCAAACCGACCCAAACCTTGGCCATGGAC
AGGTCACCAGACCGAAGCATGCCAGCGCCGCCTTGTGCACTGAGTTGGCGCAAGATTGGC
AGAGCGCCAGAGAAGAGGTCAAGATCAGGATCGAGAGTCCTACCAATCCCCTCTAATAAC
AGAATAGACAAGACCACGTTCACAAAATCCCCCTCAAGCCGCACATGATGCCCTCTAACC
ATGCCCAAGACCTGGTTCAAAATATCGCCAATCTTAATATTACCTAGAGCGAACGTCCGG
CTCTTGACGCCTAGAACCAGATGTTGCATCTTGAGCGCAAAGACCTCGTCGTCAATAACA
GCACTAGGCTGTCGACACCGCTCGACCATGAGGTGGCCGGCCTTATAGCCGTCGAACTCC
GCCACAGCCTTGAACAGATCGAGGAAGTTCTTCCGGTTGACCTCGTTGAGCTCGGTGACG
AGTCCCGTGTCGATGAAGATGAGTTGGGGTCGGAACCCTTCCTTGTCGAGCTTCTCCAAC
GTCGCTGCCCATTGCTCTTTATCGCCTTTGTAGGGTCGTAAGCGCTGCACGACTTCTTCC
GTCACGTCCATACTCTTGTTAGGGTCGGGCTTTGGTCTCCCACTCAGCGTGGGCATGTTT
TTCCCTACATCCATCTTTTGTGGCTTGTAGAAGCGCACCATGATGTTCCCGGGATGCAGG
TCGGCGTGTATGAAGTTGTCTATTAGCAACATGTGTAAAAAGGCATGGAGACAGCAACAT
ATGTAGAAACGCGTGGAGACCTTCGTCTGCGATCTCTTTTTGGAAGACGCCGCCGCCGTT
TTGGAGGAAATGTTCAAGTGGTACACCTGTGGCGAATTCTTCTACGAGCACCTGCCGCGT
CGTGTACTGGCTGTAAGGATATGGGAACCAGGCCGTGGTTCTGTTACGGAAGTTCTTTCG
GAAGATGGTCAGGTTAGCGGACTCTATGCGCATATCGAGCTGGAGTCGCATCATCTCGCC
GAATTGCTGAACCTCGTCTGGAAAGCTGAGCCACTCCATCGTGGGTATGGCATTGATGAC
GTTGGCAAAGAACCCCATGATACGGAGGTCGCGCCGGACGATGCGCTCGATCTTCGGATG
CAGGACCTTGATAGCCACGTAGTTGGAAGGTACTCTCGCAGGTGTACTCTTCAGCAATGG
ATCAACCGTCTTGTGTGCGCGTTCCATGAGCGACTTGGGGTACTTGACGGCGTCATCGTC
TAACGCTGCCAAATCTGGCTTCAACTTCGCCTTGTATACCTGCGCAATCGCTCCAACACC
TAGCGGCTTCTCTTGGAACTCATCAAATATATCTTCAAACTTCCTTTCAAATGCCTTCTC
GATCGTCTTTTTAGTGATATCCAAGGAATGTGCAGGCGCGTTCGAATGCAGTGCACCCAT
GACCGCGCAGAGTTCATTTGGGAAGATGTCCGTTCGACTAGCCGCCCATTGTCCAAGCTT
GATGAAGGCTGCACCCGCACGCTCCATCGAGTTGACCAGGAATCCATACCACCAGAGCGT
GCCACTTCGCTCGCCATCCCGATCCGCTTGCTT
>MATOU-v1_1365089
ATGTTTGGTATGCTGTTAGTCGGCAGCAGGTAACGTTAAATCGTTTATTTCTACCGTCTA
TAAGCGCCGCTCATCTACGACGACATGTTCAGCTCAGCTTCCTTGGCAAGCTCCATACAC
CCATGGACCAGGTCGTCTCGAAGATCCTCCCAGGCTTCGACACCGATGCTGACGCGGCAC
AAGGTGTCTGCAACCGTGTTGTCGCTCATCCGTCGCCACTCGATGAGGCTTTCTACGCCG
CCGAGACTAGTGGCGTGATGGAAGAGGCTCAGCTTGCTGGGCAGTCTGCGGGCTTGCGTG
CCGTTCTTCAGATCGATGCTGAAGACTGGTCCAAAGCCATTGGGCATCTGCTTCTTCAGC
CAGCCCATCTCGGAAGCTTGCAGCGAAGCGTGATCGACTTTAGCCACGACAGCCTTGACT
GCTTCGGCTGCCTCGCCTTTCTCCGAGCCATTCAGGCAGGCATCCAGGAACGCGACCAGT
TTGTCAGCATTCTGACTCTGTCGGGCAACTCTCAGCTCGAATGTGCGGAGACTCCTCACG
CCCAGCCAGCCCTCCATGCTGCCCATCACCGCCCCGAGATGCAGCCGTTCGCCAAACATG
GTCCAGTAGTCCTTTTCCCAGCTTTCTCTGTTCTTGCCGATGGCAACCACACCGCAGAGC
ATATCAGAATGCCCCCCGATGTACTTCGTGCCCGAATGCATAACATAGTCCGCACCCCAC
TTGAACGGGTCTTGTAACGGTGGCGGAGCAAATGTGGAGTCGATAGTCAGGACCGCTCCT
CTCTTGTGCGCCAGCTCGGCATAGTATTGGATGTTGTAGGCCTTGCCTGTCGGGTTGACC
GGGGTCTCGAGATGCACCATATCGCCTTTCCCCAACCCTGCCTCATCCCAGCTCTTCTCA
TCGAACAGATCCACGACTTTGCACTTAGTCAGCTTCTTGTAGATGTCCAGCACTCCATGG
CAGCCGTGGTATCCAGCTCCAATGGCAACAACTTTCGGATTAACGTAGACCAGCAATGCG
TGGAAGGCAGCAAGACCGGAAGTATATGTGAGGCATGGTGCGCCAATCAAGGATGTGAGA
AGGAGCTCAAGGCGTGAGCTGTTTGGTGCCGTGAGGCGCGAGTAGATGTGTGAGTCGGCC
GCTATCGCTGTGCCTGGCTCTCGATCCGGAATGTCTAGGTCGTCGGTCGGGTGAAGCTGT
TCTGGATCATGGGGATAGCGGAAAGTCGACGATACATGCAGGGCGGGTGCGACGTCAGTG
TAAGAGTTGATCGGATCATCCGCGTGTACGCTTCTGGTTGCGATGGAGTTGCGCGGTGTT
CCTGGCGGCTGCGGAACTGTGAGCTTCGCCGTATTAGGATTGCCGTTAGCTTCAGCCATT
ACTACAATGCGTGTGTTCTCTACGGGCGTCCCCCATGTG
>MATOU-v1_1368420
CCCTCCTCTTCACTGCGCCCTCGGACCAAACGCCTCATCTCCGGCCTCGACGAAGGGGAC
GAAGTCGATTATGATCCGGCAACTGCGCCGACCACTCGGATAGCATCGCCGGTACCTTCA
CCATTCGACAGCCGAGCAGTCAGTCCGATCCCGAACGAGCGACTCCCAAGGACGTCGAGC
CATGGAAGGACTCACAATGGGAGAAGCGGCACTTCAAGCCTGGGCAGGGCTGATGCCGCC
GGCAGGCAGCGACGACAGGGAAATGAGTCGCCCTTGGCTGGCCTATGGGGCAATTCCTGG
AGTACCTTGCAGAATATGGCGTCTGATCTGCTCAGTGGAGATGCCGCCGCCGATACTAAA
GACAAGTCGACACGAACAAAGAAGCCGCTGAGTAGCTTCCGCGACGAGCTATTCTCAAAC
ACGCAGAAGAGCGCGTGGGGTCCGCAAGCGCCTGGACCACGCCTCGCTTCGCAAGACATA
GGCTCAGGGACGAGGGAGGAGCAGATAGCTGCACTCAGAGCGCAGAAGAGAAAGGCCATG
CTGACTGGTCAGGATCCCACGAGCTACGCAGACACCTTCGGCAGGTACAAGCGCCGGACT
TCGGATGATCACGCGGCGTCTGCACCGCCAGGCGACCATGAGGACCGAGATGCGCTCGTC
TATGTGCATCATGTGAAGAAGGACGACACTTTGCCCGGGATCACGATCAGGTACAATTGC
AGTGCCAATACACTACGAAAAGCCAACAGGATGTGGCCCAACGACACTATCCAAAGTCGC
CCAACTTTGATTTTGCCCGTTGATGCTTGTGGCGTAAAGGGGAGGCCTGTTCAGAGCTCA
GAAGCAATAGACTTACTCAGCTCTGATAGTGATGCCTTGGCTGCTGGACTGGCCGAGGAA
GTCCCATGTCAACAGCAAACTCATCTTACTAACGGAGAGGCGTATGCTCGCAATCGCACT
AATTCAGCATCGACGGACACTACCGGTCGGAGACCCTCGTCTTCCGTAGCACCATCAAGT
CTAGATAGCGAACCCCCCTGGTTCCACGATTCCTGGGTGGTACTACCAGGAGCAGAAAAG
CCCACCGAAATCGCACGCCTATCCCGTCGTTCTCTTGGATACTTCCCTCGCGCTCGCCGA
AAAAGCCAGATGTACTCCGATTTCAACACGACCCCTTCTCACTCCCTCGACCTTACCCGC
GAGCATACAAATACATCCGATCTCATGCCCGGCTCTCCTTACCAACAAGACACCGCATCT
TCCCATCAGCGCCCAGGTGCCGGCCGCCGTCGTCACAGTAACGCCTCCAACGGCTATTTT
CCTACCTACCTCGCCGGCCCTGGGGGAGTCGGAACCATGAACCGGAACGTCCGTTTCCCT
GGCCCTGCACAGGATGGTCTGAATAAAGTCTTCGCCAAACATCTCCCTGACGTCGCGCCC
CCTTCTTACTGGAGTCATCAGGGTCTTTTGGCCCCGGAGTTGCCGGGTTATAGTGATGAT
CCTCCCACAGCTTCTGCTTCTGGAACTGGCACACCGACTACGGGAGGCAGGAGTCAGCCG
ATGAATTTGGAGAATGTAGGGGGCGCGATTGAGGGGTGGATGCGGAAGGTTGCGGCTAAT
GCTAAGACGGCTATGGAAGGTTCTTCATCTGCTGAGAATCAGCAACAGCAATGGCGGCAG
AAGTCTTCCTCCGCGCGAGGGCCTGCCGGTGGGGTTGGTGTTGCAGCCAGAAGGGATAGG
GGAAGGGGTGTTGAGGACCTAATCGAGATGACGGATGAATTTGAGATTGGTGAGGATGAG
GAGGACGAGGATGATGAAGCTTATGGGCCGAGCCGGGGTCGAAAGGGAAGTGTCATTCAT
GTTGGACCCAGTACGGCACCTTCCTCCTCTACGGGCTTCAATGAGAATACCGGTACGACG
AGAGAGAGGTCGAGCCGAGGTATGGGTGGAAAAGGCGCGAAGAGTTGGAAGGATGATTGA
AGGCACCGAAtcttttcttttcttcttgttttgttctttggttttgttAGTTGGTTATAC
CCTTAGAGCAGCAAACCCCGCGTTTTTCCAtttttttCGGTCAATTTTCCCTAGTTTCTA
AAACTTTTATAGCTAGTTCAGCCTTCTCCTACCTAA
>MATOU-v1_1369240
TGCAGTGTTTTGATACGTCAACGTGAGGGTTCATGATAGACTTATATATACCCCCGTGTA
CAACAGAAGTTATAGATCATATCCCCTAGCGTGCTGGTAAACCCAACACGCAACTACAAC
AACGAGTACCCTGTCATATGATGATTTGTCGACGTACTCGGCGGCAAATCCTCCTCTTGC
GTCCCCCAGTCACTCTCATTCCTGCCGAGCGTCAGCTCCAACACCCCACCATTCAAGAAG
AAATCATGCGTCAGCCAATTCTTCCTATACGCCTTCCCATCCAGCGTGGCGCTCTGAATA
TAAAGATTCTCATACCCGGCATCGAAATTGCGATTCCGCACCGTCGCCTTCTTCCCTGTG
ACGGGATTGGTAATACTCCATTCCTCGAAGAAGGGCGGCGTGATAAGATAGACGTCCTGG
CCCGGGTTGGGGAAGAGTCCCATCATGGTCAGCGCGACGAAGGATCCCATAGCGCCGCTG
TCGTCGTTGCCGGGGATGCCGACGAGCGTGGTGTTGAAGAGCCGCGGGATGTAGTAGTGC
GCTCGTTCTGCGCTCTTCCCCGGCCGACCCGCGTAGTGGTATTGGAACACAGGCAGGAAG
CCTTGCTCGTCGCCGATGTACAGAAGTCCGCTTTCGTGGAGGTAGTCGAGCCGCTTGACG
AACTGGTCGGGTCCGCCTAGCGTCGTGATGAGCGAGGCCATGTCATGTGGGACGAATGTT
GTATACAACCACGAAGACCCTTCGTACGTCTCATGCCCATCCGGGTTAAGGTAGCAGCTT
GTGAAGTTCAGCAGCGGGGAGCAGAAGATTGGGTCTTGAAACCCCCATGTGCCATTTAGG
AAGCGCGGCTGCAGAAACCCCGTAAATCCTGTATCCGTGCCGTTGATGCTGGAGTTCTGC
GTGGGGAGGTACATGTTTCGCCAGTACTCTGATCGTCCAAAGTACTTCTGTGCGTCGGCG
CCGTGACCCATATCCTGCGCCATCTCGGCAATACAGAAATCATCATACGCATACTCGACT
GTGCGACTGATACTCCGCGTGAAGGGGCCTACTCCGTACGGATCGTAATCCTCGGTAGGG
ATGTAATGCAGATTCTTCCAGCTGTGCAGCCCACCACGACCTTGGACGCTCCAGTTCTCA
GGCTCGACCTCGGCGTCTCGAACGACGGCTTCATATGCCGTAGCCCAATCCACGCCGTCC
GAGATACCCCATGT
>MATOU-v1_1370014
ATTGGCATGGCCTTCTTCAACGTGGTACACCAGACATGGACGGCGTTCCCGGTGTCACTC
AGTTTCCGATTCCGCCACAAGGGAACTTCACTTATCGGTTCTCGACAGGGTCAGAATACG
GCTTCTATTGGTATCACACTCATTTCCGAGCCTATTACAACGATGCTATACGCGGGCCAC
TCCTAATACATCCTTCACCATCACGCCGCCGCCCATTCGAGAGCCTTGCTCGAGATAGCA
CAGAGTTAGACGCGATGCTACAAGTTGAGCGAGCCGCCACGCCGCTCCTGTTGACCGACT
GGTATCATCGGCCCTCGGATGTTATCTACGATGAATACTTTACCACCGGCGCGTTCCCTC
AGTGTGTCGACAGCCTTCTGGCAAATGGATATGGAAGAGTACAGTGTTTGCCTGAAAGTG
TCCTTCAAGCCGGTCCAGGATTGGGATTAGAGCCCATCGTCGCGAACGATCTGCATGATC
CATTGAGCATGCCTGGCATGTCGATGGACACAACTTCAGGCAGTAACATGCCGATGGAAA
CAGTGTCATCTTCCTCCATGTCGATGGACTCAATGTCGATGGATATGTCCATGAGCATGC
ACAAACGGTCTGATCATGCAACAATGACGGCAGCAGACTCTACAACCTCTGGTATGAGCA
TGCTGTCGGCAACCAGCACGTCCACGTCACTGATGGCCACCATGTCAGGCATGGCAGATA
TGTCCAATCTTGGTCCCAAAGGTTGCAGTATGCAAATGATGTTCAAACCAGGCTTTAACG
CAAGTTCTCTCCCACCAGAGATATGCAGCAACACCACGTCAGAGCTGTTCATGTTCAACG
TTGATGCTTCTCAAGGCTGGGCAGCTTTCCATCTGGTTAATGCAGCTGCCGTGAGCAGGC
TGAGCGTCTCACTTGACGGTCACTCCATGTTCGTCTACGCTGCAGACGGGCTCTATGTAG
AGCCGCAAGAGGTCAAGGTACTACACATCTCGATCGGCCAACGGTATTCGGTGATGGTGA
GACTCGATCAGATGCCGGGAAACTACTACCTGCGTTTTGCTTCGTATCCATACGGCGACA
TGCAGCAAGTTATCGAAGATCAAGCAATCTTGTCATACCAGACTAATGGCACGAGTATGA
CCAATATGGACAGAGTGGACGATTCCACCTTGACCTGGATGCTTGTGAACGGGTCGGCAA
AGGTTGATGCTTCCGAGTTGGACGACCAGATGCTTGCACCCTTTGACGGAAATGCGCCCC
CAAGCGGCCCATCAGATGTAACAGAACTTTTCGCCATTAATCAGACCGATATTGTCACCT
GGGTGGTCAATGGCCAACCATTTTCGGAACCACAAAATCCCATAATATACGGGAATGCTT
CCGATGGCTGGAATGCTGCCACAACTATTCACATGCCCGGTAACTCGATCATTGATCTTA
TCATGCATGTTGCGAACGACTCGATGGATACGATGGGGCATCCCATGCACCTTCATGGTC
ACAAATTTTGGTTTCTGGGGTCGGGTGAAGGCGTGTTTCCGTATCAGTCTGCTACGGACG
CACCTTCATCCATGATAAATTTGCAAAATCCTCCTTATCGAGACACCATAGATTTGCCAC
CGTCAGGATGGGCCGTCATTAGATATGTTACCGACAACCCAGGAACGTGGTTGTTCCATT
GCCATGTGCAGTGGCATCAAGTGAGCGGAATGGGAGTAGTACTCGTTGAAGACGAGGAGC
GAATGCGAAGTATGGTGGGGTCGATCGAGGACGCCGCCAATAATCCAAACACGACTGCTT
TGGCAATATCTCTGGCCAGACCTACAGTGATTCCCACTCTCTCATATTCCGCTGCCTTGT
GCGCAGCAGTATTGAGCCTTCTATTTCATTAGCACTGGCGAGGACAAGACAAGCCGTCAC
AATGCAAACGTCAAATAGAGCTGGATTGCTTTGTCGATGTATACAGGCATTGTGCAAATA
TTGTTGTTTTACTCTTGCGGAAGGAAGACAACATCTGTGTAGATTCTCCAAATTGGCTTT
CAAAGC
>MATOU-v1_1381072
ATATGAGGTGTGCAATACCCTGCCGTTACGCTGTCGAGCGAGCGATCGTCCAAGTTCCCG
GAACACTCGCTCGCCGCTCATCACTGAGGCGCTTCGATCCCAGATGGCAGGATCTGGAGA
CCCACTGGATGCGTGCTCGGTCAAAGCTCGCGAGGCGGCTGAGGCTACAAGAGGCTTGAC
TAGTGGAGTCAGCAAAAGTAGCTCGTCCTCAGGCTCCAGGATATTCGTGAGAGGCAGCAG
CCGGTTCTTGTCGCGAACGACGGTGATGGAAGAGTTGTAGGCTTTCGTGGACAGAGTCGT
ATGAGATGGCTGCATGTTAGACAGTAAGCTGATTCCAGGCGGGTTGAGTGCCTTTTCCCA
GCTGGTCGATTTGGCTTTCATTTGAAGGACTCGCCGGAGCGATTGTCTCAGACGGTCATT
GGTTATCATGCCGTTTTCCAACCCTAATTTGAAGCCCTCGAGAGCTTCTTGTTGATGCTG
GAAAGATCTGCATAGGAGAACGATGTCGCACCCAGCGTTGATGGCCATGACGGTGCCGCC
ACCAACACCGATATTGTGGCTCAAAGCTTCCATTTCAAGACAGTCAGAGATGACAACACC
GTTGAACCGAAGATCATTGCGGAGAAGTTCGTTCACCACTTGCTCAGATAGACAGGCGTG
CATGACATTAAGTCCGGCCGAAGACATTGCGCAACCACCAACCATCATAGCATC
>MATOU-v1_1381737
ACATGGGGAAGCTCTGAAGCGGACAAGGACCTGGCCGTTAACATTGACACTGATGCGCCA
CCATGCCAGCGATTGGGGCAGCCCGATGATGTGGTGGTGGTGATGCGCACGGGTGCTACT
GAAATCAAAGACAAGCTTCCCATCCACTTCAACACGACATTCCGCTGCTACCCGGACCTC
CTGATCTTCTCGGATTATGAGGAAACCTTCGAAGGCCACCAGATCCATGACGTGCTGGCC
GACGTCGATAGCAACCTCAAGCAATCCAACGATGACTTCAAACACTACGAACGACTCCAG
AAGCTGGGTCGGGAAGTCCAGAAGCTGGGTCGTGAAGGATTGCAAGCCGACGAACTGCAT
GGCGAGAGCTACGAAAGCGGACCTGTTGGGAAAAACGACAATCCCGGATGGCGCCTCGAC
AAGTGGAAGTTCCTGCCTATGATCGTCCAGAGTCTGAAGCTTCGCCCGGAAAAGAAATGG
TTCGTCTTCGTCGAGCCAGATACTTACATCGTCTGGAGCAATATGATCCAGTGGCTGCAG
AAGCTCGACGCCAGGAAGCCATTGTATTATGGCAGTGAGGTGCAAATCGGGGACGACATC
TTTGCGCATGGTGGCACGGGATTCGTCATGTCGCGGCCGGCCATGAAGATGGGCGCGGAC
GAGTATCTGAAGAATGCAGAGGAATGGCATGCTCGTACCGCCGCTCACTGGGCAGGCGAT
TGCATACTTGGTACAGCGCTCAACCAAGCTGGTCTGCCCTTAAATTGGGCATGGCCGATG
TTCCAAGGCGGTAACCCTGCCGACCTTAATTGGGAGGATGCCAAGGGAGACTGGCGTTTG
TGGTGCACAGCTGCTATTTCATACCACCACTTTACATCTTTCGAGATCGAGGACATGTGG
GGCTGGGAGCAACAGCGGATTGCGCACTCACTCGCGAATCAAGGCAAGCAATCGTTCTGG
CGTACTGCCGATAACATCCTCCACCATCGCGAGGTGTTCAAGGAGTACATCTTACCAAAC
ATTACCGAGCCGAGGCATGACTGGAATAACGTCTGCGAAGGGATTGTCCCCGAGGGCGAA
GGCATGTCACTGGACCAGTGCAGGGGCGAGTGCGAGCGGCGGAAGGGATGTCTACAATAC
TCGCATAGCCCGACCGGCTGCAACGTATCTGACACGTTCCACTTGGGCACCGTGGGCGAG
GGGACGACCTCAGGATGGCTCACCAATAGCGTCATGGATTGGATGGAGCACATGCACAGC
TGTCAGAGCAAGGACATCAAGATCCCCTGAAGGAATGAGGAAGAAGAAAGGAGTGGAGAG
ATGATGATTGGTTTTATCAGAGATACCCTTATCCCGTCCGCTTAGATACCACATGTTTTC
CATTTCTTGGTTTC
>MATOU-v1_1382451
CGCAGGCCAACGGAACGCCACCAAGCGCAAACGCCAATGGTAACCTTGCCGACAAGTTCT
CTGCTTTGCCAGACACCCTGCGCAGCACCAAGTCTCCTCTTGTTGGCATCTACTCTTATC
TCAGCAAGTCCCTGATCACTGGCGCTATCACTTCTTATTTGCTGCTGTTCGTCCTGCACT
GCACATGGGTTACCTCGAACGCCTACTCCTCGCCTTCTGTTGTGCTCGCCTCTCGCCTTC
CGGACGGTAGCCAGCACATCATCGATGACTACCGTGAGGCGTACTACTGGCTGAGACAGA
ACACCCCGGAGACTGCTAAGATTATGAGTTGGTGGGACTACGGCTACGGCTACCAGATTG
GTGGTATGGCTGACCGTCCGACGCTGGTTGACAACAATACCTGGAACAACACTCACATTG
CGACTGTCGGCAAAGCCATGTCTAGCCGGGAGGAGGTGTCTTACCCTATCATGAAGCAGC
ACGAGGTTGACTACGTGCTTGTCGTTTTCGGTGGACTGCTTGGGTACTCGGGCGACGACA
TCAACAAGTTCTTGTGGATGGTCAGGATCGCTGAAGGTATCTGGCCTGACGAAATCAACG
AGCGCGACTATTTCACCCCGCGTGGCGAGTACCGTGTTGACGACCAGGCTACACCCACCA
TGCGCAACTCGCTCATGTATAAGATGTCTTACTACAACTACGACAAGCTTTTCCCAGGCG
GCCAAGCCATGGACCGCGTCCGAGGCTCGCGCTTGCCGGCTGAGGGCCCTCAGTTGAACT
CGCTCGAGGAAGCCTTCACCAGTGAGAACTGGATCATCAGAATCTTCAAGGTCAAGGACT
ACGACAACTTGGGCCGTAGTCACCAGGAGGCTTCGGCTTTCGAGAAGGGCAACAAGAGGA
AGAAGGCGGCGGGAAGTAAGAGGAAAGGAGCGAGAGTCTTGCGAGTCGACTAAGATGTGG
TGGAAGGAATCTTTGAGTGACGCCTTGATGGCGTCGTTGTAGCATACAAAAATGATCGGC
ATTAGATACTGGATTTTCATTGAGAACAAAAGTCGGCCGCTCACCGTGGACCTGGTTCAA
TTTGGTTCGTGGGTGGGTTGAGTGCCTCTCAATGCTTGATGAAGTGTTCATTGCA
>MATOU-v1_1382875
GGCATACACATTGCCGAGGCCCTTGGTATCCCATACTTCCGAGCTTTCACCATGCCATGG
ACGCGCACGCGAGCCTATCCCCATGCCTTCTCTGTGCCAACCAAAAAGATGGGAGGGCAC
TACAACTACTACACATATACCATCTTTGACAATCTCTTCTGGCGGATAACGTCAGGCCAA
ATTAATCGCTGGAGATGGAAGACGCTTGGACTGCAACCTACCAGTCTGGAAAAGTTACAA
CAGAACAAGGTGCCGTTCTTGTATAACTTTTCTCCCAGTGTTGTCGTGCCGCCATTGGAC
TTCAGCGATTGGGTACGTGTCACTGGCTATTGGTTCTTAGACGAAGGTGACGCATGGACA
CCGCCGGACGACCTAAAGGCTTTCATTAACCAGGCGCGCGAGGACAAGCAAAAGCTTGTT
TACATCGGCTTCGGCTCCGTGACCGTTGCAGACTCAAAGCAGCTTACGCAGCAGGTTGTC
AATGCCGTCTTGAAGGCTGATGTACGATGTATCCTATCGAAGGGCTGGTCGGATCGCCTC
GAGACGAAAGATCCTGGAGCTGTGGAAGTTCCATTGCCACCCTCAGTTTTCCAGATACGT
TCTGCCCCTCACGATTGGCTATTCCGACAAATAGACGCTGCCGTACATCATGGCGGCGCT
GGAACAACCGGTGCTAGCCTTCGGGCAGGCGTGCCGACCATCATCAAGCCTTTCTTTGGT
GACCAATACTTCTTCGCGACGAGAGTGGAGGATCTTGGTGTAGGCATACATCTGCAGAAA
GTCACGGTCAACACGCTTGGTAGAGCGTTATGGATCGCTACGCACGACGAGCGCATGCGC
ACGAAAGCCCGAGTCCTCGGCGAGCGGATTCGAAGCGAAGATGGTGTTGGTACAGCCATC
AAAGCCATTTATCGCGACCTTGATTACGCCAGATCTCTTATCAAGAAGCGACCGAAGCAG
ACGGAGAGCGGTCTGGAGCTCGAGGAGCCAGAGGAGGAGAGCTGGACCTTTGTGGAGAAC
GACGGCGATGTCACTATCGAAGAGTTACAGACGGACAGCGAATCCACAGCACAAGACAGT
GAAGGTTGAAATTTCGGACTTATGGGCAGACGCCCTTATCTCGGTTCCATGGGGCTTAGA
GGCAGACCGACTTAGATCGGGCACTGATGATTTAGCGAGGCGTTTTGGAC
>MATOU-v1_1382876
GGGTTAAGAAGCACGGCATTGACTTTGTTCCAGTGGAAGGAGACCCCGCCGAGCTCATGC
GAATATGTGTTGAGTATGGCATGTTCACGCCTTCCTTCTTGCTTGAGGTCAATTCAAAAT
TCCGTGGCTGGCTCGATACACTTTTGAAAAGTGCTTGGGAGGCGAGTAAAGGCTCGGATT
TGCTCATCGAAAGCCCGTCAGCTATGGCTGGCATACACATTGCCGAGGCCCTTGGTATCC
CATACTTCCGAGCTTTCACCATGCCATGGACACGCACGCGAGCCTATCCCCACGCCTTCT
CTGTGCCGACAAAGAAGCTGGGAGGGCACTACAACTATTACACATATACCATCTTTGACA
ATCTCTTCTGGCGGATAACATCAGGGCAAATCAATCGCTGGAGATGGAAGTCGCTTGGAC
TTCAGCCTACCAGCCTGGAAAAGTTACAACAGAACAAGGTGCCGTTCTTGTATAACTTTT
CTCCCAGTGTTGTAGTGCCGCCATTGGACTTCAGCGACTGGGTCCGTGTCACTGGCTATT
GGTTCTTGGACGAAGGTGACGCATGGACACCGCCAGACGACCTAATGGCTTTCATTAACC
AGGCCCGCAAAGACAAGCAAAAGCTGGTTTATATTGGCTTCGGCTCCGTGACCGTTGCAG
ACTCAAAGCAGCTCACGCAGCAGGTCGTCAATGCTGTCTTGAAGGCTGATGTGCGATGTA
TCCTATCGAAGGGCTGGTCGGATCGCCTGGAGACGAAAGACCCTGGAGCTGTGGAAGTTC
CATTGCCACCATCGGTGTTCCAGATACGTTCTGCTCCGCACGATTGGCTTTTTGGCTATT
CCGACAGATAGATGCTGCCGTACATCACGGCGGCGCTGGAACAACTGGCGCTAGCCTTCG
CGCAGGCGTACCGACTATCATCAAGCCTTTCTTCGGTGACCAGTACTTCTTCGCGACAAG
AGTGGAGGATGTCGGTGTAGGCATCCATCTGCAGAAGGTCACGGTCAACACGCTTGGTAG
AGCGTTATGGATCGCCACGCACGATGAGCGCATGCGCACAAAAGCCCGAGTTCTTGGCGA
ACGGATCCGAAGCGAAGACGGTGTCGGCACAGCGATAAAAGCCATTTATCGCGACCTTGA
TTATGCCAGGTCACTTATCAAGAAGCGACCGAAGCAGACTGAGAGCGGTCTGGAGCTCGA
GGAGCCGGAGGAGGAGAGCTGGACTTTTGTGGAGAACGATGGCGATGTCACTATCGAGGA
GTTGCAGACGGAGCGCGAATCCACAGCACAAGACAATGAAGGTCGGAGTTTTGGACTTAT
GGGC
>MATOU-v1_1383469
CGATGCCTTGTCAAAGCCGACGGCCATGGCCTGTACTTTCCACAGAACCCGCCTTCCATA
GGTTCGCCGCTCACTGAAGACTGTGCAATTCCCCTAGGCTCCCCCGGCAATACCATCTCT
GTCACTATCCCTCAGATAGCCGGCGGAAGAATATGGATAGTCGAAGGCAAACTGACATTC
CTGCTCAACCCCGGCCCAGCCCTGGTGGAGCCCTCCGTCTTGAACCCGAGTGATCCGAAT
GCGAATGTCAATTTTGGCTTCTGCGAGTTTACGCTCAATGATGCCCAGCTATACGCCAAC
ATCAGCTATGTCGATTTTGTGCCGCAGATTCCCATCGCCATTACTTTGCAGGAGAATAGT
GGCGAGAGCCAACATGTCTCTGGCATGGCGCCTGACGGTCTGGACCGGCTTGCTGATGGA
CTTCGACAGCAAGCTAAAAAGGATGGACGTCCTTGGGACAAGCTAATCGTCAACCGGGAT
GGAAGGAATCTGCGCATCCTGAATGCGACGCATGGGGGCGCTGTCGGCGCAAGTTTTGAC
GGCTACTACGAACCGCACATTGAGGAAGTATGGAAGAAGTACAGCTCAGGATCCTGCATG
AGGATAGACACCCAAGCAGGACCCGGGACACTTGAAGGAAAGGTCAATCACAAAGGCGAA
TTGGTAATCGGAGGCGAAGCTTTCAGTAAACCTAACAGCGCAGACGTGCTTGGCTGCAAC
TCCGGACCGTTCACGACAGGACCAAATCCAACAAGAAACGCAATCATACCACGGTTGGCC
GCGGCCTTCCATCGATCCTGTCTCCTAGCCACCGAGAACCACCCTTCAGATCCGCGAACC
TTCTACTGTTGCGACCCTACCAACCACTATGCCCGCCTAGTCCACGAAGTCAACATCGAC
AAGAAAGGCTACGCGTTCGCCTACGACGACGTGCAACCCGAGGGTGGCGATGACCAGAGC
GGCAAGGTCAACGGTGGTGACCCAGTCCTCTTCACCGTCGCCGTCGGCGGTAATCATGCT
TCAGACCGTAACCCTTCAATCCCGCCTATCCCACCTCACCGTCAGCCCTCACAGCAGCAG
CAGCAGAAGTACGACCGGCCGCCACCACCGCCGGCTGAAGGCGGGTATCGCGAGGATCAG
CAGCAACATGAGGGGTTCAGGAGTAAGATAAAGGGGCTTGCTGGGAAATTCCTGCATTGA
GACGGGGTTTCTGGCCCGGTTTTAGTAAAGCCGTCTTTTTCCTATTCAAAGAAATTGGAA
TCATCATTTCGACTTTCAAAAA
>MATOU-v1_1383872
TTCCTGGTGATACGCATCACCAGTGACTTCGGCATCAACGCTGTAGTACGTCTGGCCTTG
AATCGGGGTCACTACACCAGTTTCCACGTTTAGATCGTAGACATCATGCCACTCAAGACT
GAGGTCTCCTTCGTCGTCGTCAATGTTCATCGGGACCCAAAGGTACCTCGCATCCCAGAT
CGAGTTCAGGTCCCATTGATCGCCCATGTAGAGATAAGTCGTCGCTTCCCCATTGATCGC
CCATGTAGAGATAAGTCGTCGCTTCCGATCCAACAATGCGCATAGAATAGCCAGATTGTG
AGTTGTATGTTCGGGTGTTGAGGGGTGCGATGATCCACGGCTGAGACCATGGCCCCTCCA
GACTATCTGCGCGGAATGCAACAACGTTGTTCGGTCGATATCCTGTCTTGTGGCTCATCA
TACAATAGTAGCTCTTCTCTGTTTGGATGATAGTCGGCGCTTCCAAATCGAACTTCGGGA
AGCGATAGACGACTTCCTCCAACTCGCTGACATTAGCGTTATACCTGGTAATGTAATTGT
CGCGGCCCTCGACGGTATCGCCATTGGAATAGAGAGCGTAGGTTTCACCGGACTTGTAAT
CCGTGAACATGCCGAAATCTTGTGACCAGTTCCCTAGAGGTGCCGTTGCCGAAACGAACG
AGTACGGTCCCTCTGGCACAGGCGAGGTGGCGAATCCTTGGAGTAGAGCCGTGTAATTCT
CATTGTCTGCATGCCACCACATATGATAGAGACCCGAAATATCACTGTATATAACCTTTG
GTCGCTGGACGACTTCACTGGGGCTGACCATTTGTTCTTCTGGGTCCAAAGCCAGACCAT
GAAATTCCCAAGTCACCAAATCCGGTGAACTGTAAGCTGAGATACCACCACCTTCCGGCG
TCTCCTCAGTCTTGTACTCCCCATACAGCCAGTACTTGCCAGATGGCTCATCATAGTACA
CGTTTCCCGCATGGGCGTTGACCCGGTTGCCATCAGTGTCAAGCCATCGACCGCC
>MATOU-v1_1386940
CTCTATAAGCACGTCACTGACAGCACTGTTCAAGCTTGGACGGGTAGCTACTTGAAACGC
TTGCTCACTAACCTCGCTTCGTTCGACCAGTCTAGTGCAACACCTGCACTTGACCGTGCG
AAGCTGCTAGCGCAGTACCGATCGGCGAAGCGCCGTCTCTTCATGTTCGACTACGACGGG
ACCTTGACACCTATAGTCCGAGACCCGCAATCCGCCACGCCTTCTGATCGTGTTATCCGC
AACCTGAAAATGCTCGCCTCGGACCCGAACAATGCCGTGTGGATCATTTCCGGCCGCGAC
CAGCAGTTTCTCGACGAGTGGATGGGCCATATCACCGAACTCGGCCTCTCTGCTGAACAC
GGCTCCTTCATGCGTAACCCACACAGCCAGGATTGGGTCAACCTGACGGATCGGATGGAC
ATGAGCTGGCAGTCGAAGGTCCTCAGCGTGTTCGAGCATTACACACAGAAGACACAGGGG
TCGTTCATCGAGCGCAAGAAGATCGCCCTTACCTGGCATTACCGTAGGGCCGATCCAGAG
TATGGGCTCTACATGGCTCGTGAATGTCAGAAGCATCTAGAGCACACGGTTGCGAAGGAC
TTTGACGTCGAGGTCATGCCTGGAAAAGCCAACCTAGAGGTCCGGCCGCGTTTCGTCAAC
AAGGGCGAGATTGCGAGGGCGTTGGTGAAGAACTATGGCGAAGGCGATAGTAAAGCACCG
GACTTTGTCTACTGCCTCGGCGATGATTTCACTGATGAAGACATGTTCCGTTCGCTGAAC
GCATCGTCCCTGCAGCCGGAGCACGTCTTCGCCGTGACCGTCGGTGCGAGCTCGAAGCAG
ACCCTAGCCAAGTGGCACTTGCTCGAGCCAGCCGACGTGATCTCCAGCCTTGCTCTCCTG
AACGGGCAAAGCGACACCGGTAGTCTCGGCGCCGTCGCTGTGGTGGATGGCTCCGTGCCG
GATTCGAGGCTTTAGGAAAGCCCCGTCTTCGTCGCTCCTTCTCCTACCCCACTGAACAGT
TATCAGCAGCACCAGGGCGATAACGTTCCCCGAGCAAGCGTCACGGTGTAAAAATCCTCG
ATTGTGTATTTGGAACGGCTATGAAGACATCAGATATGCACGATTAGATAGCAAGGTTTT
CTTGACCTTAAGCCAGAGCGCTGCGAAAAAATCCAAAAGGGCATGGTTATGTAGTCGGAG
CATGCATGGCTAGTTGATGCACCAACTGGGGTGAAATAATTCCTGCTGTTGATTTTGTAC
CGTAATAGTGAGATTTCCTCAGTAGATGGCTGGCTGCGGGTGGGCGGGGATGAACATAGA
CCTAAAAGGGAAGGGGGAAAAGGGGGGCGATATTTTATGTGTTTTGGTA
>MATOU-v1_1387624
CTACAGGAGTATCAGTACTACTGGCGAGTTGAGCCCAACGTCCACTTCTTCTGCGACGTC
GATTACGACGTCTTCCGCTTTATGAAGGACCACAACCAGACTTATGGCTTCACGGTAAAT
CTCTACGACAGTCCAGAGTCCATCTCCAGCCTGTGGCCGGAAACTGTCAAGTTCCTTGCC
TCGAACAGCCACCTGCTGCATCCGAATAACGCTATGGGCTGGCTCATCGACAAAGAGCGC
CGACCGGAACATAACTACAAGGCCAACGGCTACAGCACATGTCACTTCTGGTCCAACTTC
GAAATCGCGGACATGGACTTCTGGCGTTCGCCCGCCTACGAAGCATACTTCGAACATCTA
GACCGGGCAGGAGGATTCTTCTATGAGCGCTGGGGCGATGCGCCCGTCCACTCGATCGCA
CTGGGGCTGTTCGAGGACCGCGATCGGATACATTGGTTCAAAGACATCGGATATCAGCAC
ATCCCGTTCTTCAACTGCCCGAACAGTCCGAAGTGCAAAGGCTGTGTTAAGGGACGGTTC
ACGGATGGCGAAGCCTGGCTGAACAAGGAGGACTGCAGGCCCAACTGGTTCAAGTACGTG
GGGAACGAGTGGGACCCTGAGGACAGCAGGTACGGCACGCTCGCTGCCATGGCGGCTGCT
GCGAACGCGACAAGTCCCGCATAGCCTTGAGAAGAAGCAGGAAGCGCAGAGTCAGATTTG
ATAGCACGGCGTTTGGGCGTCTGAAATTTCCGTCGATACCGCAACTGTTACCTTGGAGGA
GAGTGGCATGGCATCTTAATGTGTGGAATCACGATGTTTGCGAATGTATGCAGGATGTAC
AGTTGTGATTCAGCTTGAATTGCTCGCCATTAAGCCATATCGAACAGGTAGACGCTTTGC
CACAGGAGAGCCATCAGAGGGAAGTGTCC
>MATOU-v1_1395693
TCCCCGTGAGAAACTGTTAAGTATCCTGCTTGTGCTCCATTCCCTCCTTGCGAGCCTTGT
CTACTCCATCCCTCATCACCTTTCATCATGGCTTTCTCATCGTGGTGGGTGTTCGTCTCG
ACCCTCATTGCTTCAGCCGCATCGCAAAGCAATACGGTCTCCTCTAACGCAGCAACTTAC
ACAAACCCCATTGTGCCAAATGGTGCCGACCCATGGGTGACTCGTCATGATGGTTACTAC
TACATGACCTACACGACTACCACCAATATTACCATCCTCCGCAGTCAGGACCTTGTCGAT
TGGAGCGATGCCGAGGTGAAATTGGCCTTCGATCCGCCACCAGGTCAGAACTACTCAACG
GACTTGTGGGCACCGGAGCTTCACAACATAGCCGATCGATGGTACATCATTTTCACTGCA
GACCCGAACTACGACAGCCCACCACCCATTTTGGATATGCTATGCACTTTTGCTTGTCCT
GCAGTCAACCACAGGATGTATGTCCTTGAGTCAAGCTCCGCGGACCCCTGGGAAAGCAAT
TACACCCTGAAGTCTCAACTCGATACCTATGATCAATTTGCCATCGACGGGACCTACTTT
CGACACAAGACGGGACTGTACCATATCTATAGCTGCTGGTACACTGCCTATGAATCTTGG
CCTGCTAATCTTTGTATCTCAAAGATGAGTGACCCGTGGACCGTGGAGAGCAATGTCACC
GAGCGGCAGCTGTTGAGCGTTCCATCGAACCCTTGGGAGAAGACACCATACGGTAGATCG
TACAACGAGAGGCTGAGCAGCAATGAAGGGCCTCAGCAGTTGACGAATCCGAAGACTGGA
CAGGAATTTGTCATCTACTCAGCAGCTAGAAGCGACAACCGAAACTACTGTCTAGGCCAG
TTGGAGCTAGTGGGTGAAGATCCAATGAACAACCAAGATTGGAGGAAGCGCAACGAAGGC
TGTGTGTTTTATCAAAACGCTTTGGAAGACGCATTCGGCGTCGGTCACGCAAGCTTCACA
ACATCCCCTGACGGTCGCGAAAGCTGGATCGTCTATCATGGCATGAGAAATCCCTACACC
GGATGGGCTGCTCGAGACATCCGTGCACAGAAGTTCGAATGGAATGAAGACGGGACACCG
AACTTCCCAAGACCTGGGTATGGACCTTATGAGGTGCCGAGTGGGACCAACGCTACTATG
AAAATGTGAATGGCCATTTTAGGTAGGGCTAGCACCAATGAGCATTGCTCCTTCCCAAAA
AA
>MATOU-v1_1398517
CGATACAATCCCACAATACAGCAAGGTCTCATGGCCCAAACAGGGCCTGACAACAATTAC
ATGCCTCCAGCATACTACTACACACTAGGGAACGACGATCAAACCTTTTGGGCCTTGGCC
TCCCTTTCCGCGATCGAATACGGCTTCCCAGTCCCAGAAGGCAGTAGCTCGAGCATCTAT
CTCGATCTTGCAATCGCAGTCTTCAATAGCCAGGTATACAGGTGGGATAATACATCGTGC
AATGGAGGTTTGAAATGGCAGGTATTCGAGAACAGACGCGGATATCATTACAAGAACAGT
ATCTCGAACGGCGGCTTTTTCCAAATGGCATCTCGGTTAGCAAGGTACACGGGCAATCAG
ACGTACCTGGATTGGGCAGAGAAAAGTTGGGATTGGATGTGGGACATTGGGCTCATCGAC
CCTAACTATAACGTATTCGACGGCACCAACGATCTCATCAATTGCTCTGAGATCGATCAT
ACGGCTTGGTCTTATAACCCGTCAATGCTCCTATACGGAACGGCCATTCTATACAACTAT
ACGGACGGCTCAGCATCTGAGATGTGGCAGGAACGGACCAGTGGCCTAGTTGAGGCTTGC
GCGAGAAACTTCTTCGGTCCCTTCGACAACACAAGCAACGTCATGTACGAGCCCTCGTGC
GAACCTTCGAACGATTGCAACTATGATCAGAAGTCCTTCAAAGCATACCTGGCACGGTGG
ATGAGCAAGGCTTCGGTCGTGGCACCCTACATATCAGAGTCTGTGAATCCGTTGCTCACC
GACTCGGCTGGAGCAGCCGCCGAAGCATGTAGTGGTGGCACGGACGGTGTGACGTGCGGA
CAGAAATGGTACACAGGAGAGTGGGATGGGGATTATGGTGTCTCTGAACAGCTATCTGCA
CTCGAAGTCATGCAGTCTCTGCTGTTGCTTGACGGCGACGCCGTCCGCCAGTATCCCAGG
ACAAACGAGAGTGTGCGTGTTAGAGTTGAGAGCAGTCC
>MATOU-v1_1399511
AATTGCCAAGTGGTTTGTGTATTGTCTTGCAGATAGCTACCTGAACTTATAGCATTCCCT
TTTGCAACATTTCGCACCTAACAATCAGCATTTCCTCCCTCTCATTAAAGGATAGAGATA
GCCAGCCATCTACTCATCCGCGATATCTGCCGCAGTGATATTGCCACACATGGGCGTCTT
CAACTCTCTTCCAAACTTATCCGCCGCCCAGATCAGCACGCCGTTGGACCACCCGAACCC
CTCGACCACCTCGTACTCGCCACCACCACCCGCCGCGTTGATCGATGTCTGGTTGTACTT
TTCGAAAATTGTGCCGACATCTTCCGGATCTGCGCCCGGAATCTGGGGCAGTTGAGGGGT
TGATCCTCCCGTGCTTCGCCACGTGCAGAAAGCAGAGGTGACATAGCGCTGCGCCAGGTC
GAGGGCGAGGTTTTGAATCGATTGGTATGACGGGTCGTCCGTTCCGAAGGTGGCAGGTGT
GTTGAGGAGGCCCTGGATGAGGATGTACTGTAAGGGCGGCCAGACATTAGGTTCGTCCCA
CTGTTCGCCTGTGATGAGGTTGGTGGCCGGAATTGCTCCCGGGGCGACTTCAAGTTGGGC
TGCGACGCGGTCGTAGGCACGAGACACGGCGTAGGGGTTGTTTTTCAGCCAGGTCGGCGC
CGCGCCAGTCCAGAAGGGATAGTATTGGGCTGGGGAGAAGAGGACTTGTTGGCCTTCGGG
AGCGTCGTCGATTTGGGAACCGGTGGCGTCCGAGTCGAGCGGCTCGTAGATGTGGCGGGA
GTTGGAGGTTAGAGCGGCTCGTAGATGTGGCGGGAGTTGGAGGTTAGGTTCCAGTCAAAG
TACGCGAATTGTTCCTCGTCCCACATTAGGGCTGCCATGGCTTCGCTACGGTTCGCGGCT
CGTTGTTGGTATTCTGCGACCATTGCTTCGCTGTCGTCGCCTCCGACTGTCTCGTAAAAA
TTGGCCAGTGTGATTTCGGTGGCGTAGAGGATCGAGTTCAAGTCTACTGGTACTATGTTC
TTAGTGTTCAGGCTGCGCAGCGGGAAGTAATTGTCGTTGGCTGCATCGCTTGGGTTCTTC
AGCCAGCGGCTGCTGTAGTCCCAACCACTTTCAGCACCGCTGGCTAGGTTGGCATAAAGC
TCTTCTCGCTCGGTCTCATTCAAGTCTTGACCGGGATAGATGATACCAGTCGTTGGAGCG
TAGTAAGACTCATTGTTCGCCGTGACATAATCCTCACGGAAGCTCTCCGGGCGTGGTTGG
TTGTTGAGGACAGCATAGTGGTTTAGCATGTACGTCTGATTCATTTCATCACGGACGCTG
ACTGTACGATTCTCCATCCAGAACATATATTCCTTCTCAAGCGTCGGCAGGGCACGCTCT
AGGATGGAAGTATCGTTGGTGTACTCCACGTATGCCCGAACCATCTGCGAGAGCAGCGGC
GGCTGGCTGCGGTTAAGGTAATATTGTCTCGCTCCATTTGGTACGAAACCGAAACGATCA
ACCAAATCTAGGAAGTTCTCGATGATGTTCAAGGCGATCTCGGTAAAGCTTCCTTCTGTT
CGAAGCAGTCCCTCGATGATCCAGTAGGAATCCCAATAGTAAGGTTCTCGGAATCTGCCG
CCTGCTACGACAAAGGTCCTGTTGAGCGGGATGAAGGAGGACACGCAGCCAGGGGCATTC
CCGCCAGAAGGATGAAGGAGGACACGCAGCCAGAGGCATTCCCGCCAGAAGCGCTCTCGC
AGCGTGGCGGACCCACGTAGCTTCGCGTGAGATCTGGCCAAATATTGATGACTTGGTCGG
TAAAGTTCCTGAGAACCTGACTGGAAACGTTGTTCAAGAAGGTAGGGTCGGTGGAGAGCG
AGTCGTTTGGCACTGGCTCTAATTCAGAGCCGGCTTCACCGAAGTAGTTCTCTAGGAAAG
TCTGAAGTTCGGTGTTGTTTGAAATTGGCTTCGTCAGATTATTGAAGGCTTCTATGACCT
CTTCAAGAGGTCGAGTAGTGGGCAAGTCTACAAATGTTTTGGAGTCTTCATAGGGTTGAG
CAAGCTCTATCTGCCGAAGAATCTCTCCCTGACAATACAGAGGCGAAGAGCATGGTGCGA
TTACTGATCCGTTGGTGTACAGGGCGCACGCGCTCTTGAAAGACAGGACTGCCAGCG
>MATOU-v1_1405877
ACATGGGGACAGATGAGAAAGTCAAGCCTGAGTGGTTGGAAGAATGGTACGACGGACTGA
CATACTGTACCTGGAACGGCTTGGGCCAAGCCTTGACGGCCGACAAGATACACACCGCTC
TCGACTCTCTAAGCTCAAACAACATCAATATCACGAATTTAATTATCGACGACAACTGGC
AGAGCCTCTCGCAGGGTGACACGCAATTCAAACGTGCCTGGCAGGACTTCGAGGCCACAC
CTGACGGCTTCCCTATGGGTATGAAGGCTTTCACAAGCGAGGTAAGGAAACGACATCCTA
ATGTCAACCACATCGCCGTATGGCATGCCATTCTAGGGTACTGGGGAGGCGTAGACCCGA
ATGGGAAGATTGGCCAAAAATACAAGACCGTCGAGGTGGAGAAAGAACCTGGCGTTGCTG
GGGGCAAGTTCCACATTGTTGCTGCCGAGGATGCAAAGCAGATGTACGATGATTTCTACC
GCTTCCTTTCCGAAAGCGGGGTCGATTCGGTCAAGACAGACGCCCAATTCTTCCTTGACC
TGCTTCTCCACGCCCCGGACAGAAGAGCTGTGACGACTGAGTATCAAGACGCCTGGACAC
TCGCTCACCTCCGCCACTTCAGCAGCAGAGCCATCAGTTGTATGAGCCAGGCCCCGCAGA
TACTCTTCCATTCGCAGCTCCCGACCAACAAGCCCAGATTGTTGGTACGGAACAGCGATG
ACTTCTTCCCCGAAGTGGCAGCGAGTCATCCTTGGCACATCTTCTGTAACGCGCATAACG
CATTGTTCACGCAGCATCTGAATGTACTGCCGGATTGGGACATGTTCCAAACCTCACACC
CGTGGGCTGGATTTCATGCAGCAGCGCGTGCAGTCTCTGGTGGCCCAATCTATTTCACCG
ATGAGCCCGGAAAGCATGATTTGGAGCTGATAGGGCAAATGACCGCGCAGACTCCGCGAG
GGAAGACAGTCATTCTTCGACCGCACAGAGTCGGACGAACGATCGATGCGTATAATGGTT
ACGATAATCAGGCTCTGCTGAAGGTCGGCACCTATGTCGGAATGGCTCGGACTGGGACCG
GCATCCTGGGCGTCTTCAACGTCTCACAGCAAGACGTGAGCGAGTTTGTCCAGCTGTCCG
ACTTCCCTGGAACAGAAGAAGGCGAGTACGTCGTGGGCTCTTTCCTTTCCGGTGAGGTAA
CCAAGCCTATGACTGGAGGAGGCAATCAAGCTATGCTTGGCCTTGAGCTTGGTGTGCAGG
GCTGGGACATCCTCTCGGCTTACGCACTGCGCTCGTTCACTGTGAAGGAGAAGAAGGTTC
AGGTGGCAATGATGGGCCTGCTAGGCAAGATGACCGGCTCTGCCGCGGTCAGTGGGCTGG
ACATGTACGTGGAGAGCAACGGCCGACTGAGGATCTGGGTTAGCTTGAAAGCCCTGGGGA
CTATGGGTCTGTATGTCAGCGATCTGCCGAAACGCGATCTTGATCAGCAGCTCATGGTCA
TGATCTTTGGCAAGCCGATCTCGAGAGACTGCGTGAGGGACAGTGCGAGGGATGAGAATG
TGCTGGAGATTGATGTCGACAAGGCTTGGAAGGATAGCGGAGAGGAAGCGGGATGGAGCA
ATGAGGTTAGTGTGGAAGTGTTCATCTCATGAGGGTCTACTGGGGATCTAGATGGGCACG
GAGGAATACGATAAGGCAGATTGTTCCGACCAGTGTTTGACTGTGCATAAATGCGGCGGT
AGTCTCCATGTGATTACG
>MATOU-v1_1406729
CCGCCTTCTTCTTCCAGGGCGAGACCGGCCGCAACACTCGAGGTCTCCTCCGCCTGATCA
TCTTGTGCACCATCGCCGCCGCCGCCGTCGCCAGTAGACTCTTCTCCGTCATCCGATTCG
AGTCCATCATTCACGAGTTCGATCCGTGGTTCAACTTCCGCGCCACCAAGTACCTGGTAA
ACCATGGCTTCCATGCCTTTTGGGATTGGTTCGACGACAGGACATGGCATCCTCTCGGAC
GTGTTACCGGTGGTACTCTCTACCCAGGATTGATGGTGACGTCTGGCACCATCTACCACA
TCCTGCGCTTCCTCACTCTGCCCGTGGACATTCGTAACATTTGCGTTCTGCTCGCACCTG
GATTTTCTGGCCTGACTGCGTTTGCCTCATACCTCTTCACGAGCGAGATGAGCGATTCGC
CGTCCGCTGGTCTTTTGGCTGCCATCTTCATGGGAATTGCCCCTGGCTACATCTCCCGCT
CTGTAGCCGGATCCTACGATAACGAGGCCATTGCCATCTTCCTGCTTGTCTTCACCTTTT
ATCTCTGGATCAAGGCCGTCAAGCTCGGAAGCATCATGTGGGGTGCCCTGACCGCACTCT
TCTACGGCTACATGGTGTCGGCATGGGGTGGCTACGTCTTCATCACCAACCTGCTGCCGC
TTCACGCCTTCGTACTGACCTGCATGGGCCGCTTCAGCCCCAGACTTTACGTGTCGTACA
CGACCTGGTACGCTTTGGGAACGTTAGCCTCCATGCAGATTCCATTCGTTGGCTTCCTGC
CAATCAGGAGCAGCGACCACATGGCTGCACTCGGCGTCTTTGGTCTCATGCAGCTTGTTG
GTGCTGCTGAGTGGCTCCGATCTCAGCTGCCGTCGAAGCAATTCCAGACCGTCATTCGCG
CGGCCGTGCTCCTTATCTTCGCAGGTGCTTTCGGTGCCCTTGTTCTGCTCACCGTCTCTG
GCGTTGTTGCTCCCTGCACTGGCTACGCTAAGATTCACATTCCTATCATTGCCTCCGTGT
CCGAGCACCAGCCGACTGCTTGGCCGGCCTTCTTCTTTGACCTCAACATGTTGATCTGGC
TCTTCCCTGCTGGTGTCTACATGTGCTTCCGCAACCTCAAGGATGAGCAAGTCTTCATTG
TCATCTATGCTGTCCTGGCCAGCTACTTCGCAGGTGTCATGGTTCGTTTGATGCTGACTC
TGACGCCGGTCGTCTGTGTGGCTGCCGCGATGGCTTTGAGCCAGATCCTTGACACCTTCC
TGGTTGCATCTTCGCCCAACGAAGGCTCATCAACGCAGGCCAACGGAACCCCGCCAAGTG
CAAACGCCAACGGTAACCTTGCCGACAAGCTCTCTGCTTTGCCAGACACCCTGCGCAGCA
CCAAGTCTCCTCTTGTTGGCATTTACTCCTACCTCAGCAAGTCCTTGATTACTGGCGCCA
TCACTTCTTATTTGCTGCTATTCGTCCTGCACTGCACATGGGTCACCTCGAACGCCTACT
CCTCGCCTTCTGTTGTGCTTGCCTCTCGCCTTCCGGACGGTAGCCAGCACATCATCGATG
ACTACCGTGAGGCTTACTACTGGCTGAGACAAAACACTCCTGAGACTGCCAAGATTATGA
GCTGGTGGGACTACGGCTACCAGATTGGCGGTATGGCTGACCGTCCGACGCTGGTTGACA
ACAACACCTGGAACAACACTCACATTGCGACTGTCGGCAAGGCCATGTCCAGTCGGGAGG
AGGTGTCGTACCCTATCATGAAGCAGCACGAGGTTGACTACGTACTTGTAGTTTTCGGTG
GATTGCTTGGGTACTCGGGTGACGACATCAACAAGTTCTTGTGGATGGTCAGGATCGCTG
AAGGTATCTGGCCTGACGAGATCAATGAGCGGGACTACTTCACCCCGCGTGGCGAGTA
>MATOU-v1_1407804
ACCGTAGATGCCCTCTTCTCTCAGCCCGAGCCGCAGCCCAGCGTTGGACCAAAGCCGGGC
AATATTGAACAGCCCGTGATAGTTGATGATCATGGAGATGACAGGCCGCTGGCTCGGCTT
GCACGCATTCGCGACAGTCTCACGGCAGCCATTGTCGGGCTCGACAGCACGAGCGACACT
CTCAAAGCGGCTCATCAGCAACCGAAGACGTCGATCGAGCTGGAGTACGCAGAGGACAAC
CGATCTGCCTTCTCCCCGTCTCGTAGCATCACGTCCTTCTAATGACAGTCCCGAACCCGA
GCCCTCGGTCGAGCCCTCTAGCGACACCCGTACGCCCATCCAGCGCTTTCGAACGCCGCC
GAAGAAGCCTCTATCCGTCACAGACATCATCTCGCCGGCATGGTGCGAGCTACAATACTG
GTACAACCTGACCAGATATGGTCGGGTGAGAGCCACCAAGGCCATGAAGCAGGGCTCCAG
TGTGCACAAGGTGCTGGAGGAGCAGGTGCACACTGAGGTACCCGTAGAGGTCCAAACCAA
AGAAGACAGGTTCGCTCTAAGGATCTGGAACATCATCACTGGGCTCCGGACGCTGCGGCG
GACAGGCATGACGCGAGAGATGGAGGTGTGGGGAGTGGTCGAGGGCGAAGTGGTAAATGG
CATCATCGATCAGATCACGACAACAAGTCCAGATGAAATTATGGAGGCTCAGATGCTGGA
GGAAGCAGAGAATGCAAAGTCAGGCTCTGCGAGTCGAGGCAAAACGCGAAAGCCACTGTC
CTCGGATCAGCGTACTCTGACAGACTACATGACCTCTTCCCAAACCGCATCCATTTTGGA
GAGCGGACGAGGCCTAGAAGGATGGCTAGGCACGTTGCATGAGCGGCCTCCAAACGTCTA
TCTCATCGATGTCAAGACCAGGCAATCCAAGAGCCTGCCACCGCAAGGCAGCCAGACTCG
GCCTACGTACTATCAGCTTATGATGTATCATCGGCTTTTCTCGACCCTTGCTACGAACGG
GGTTGATGCGGAACGCATTTTTGAGCGGTATAAGGTTCAACCTGACAAAACCTTCAGCGA
CACGTTCATAGCACAAATGAGCACGTTCGACACAGGGGCAGACGTTGACCTCGCAGAGGA
TGAATGGGTACCGCGCGACGCTTCTCAGGACTCCGTCTCCGAAATTCTAGCCCACAACAG
CCTCGCCGCACTGTGGTCCTTGATGATGCAAGAGTTTCAGAAAGCTGTGCCTGCAAACAG
TGTGTCCTCTCTCCTTACTGCCGAGTACAGAGCACCTGGCAGTGGCGACTTGATGGGCAA
ACGTAGCTTTGTCTTCGATGCCGAAAGGCTCGATGCGTATGTGCAGGACGAGATGAGATG
GTGGAAAGGCGAGAGGGAGACCAAAGGCGTAGAGATTGAGGAGGCTTCAAGTGCCAGATC
TGCGAGTTCGCGCCGAACTGCACATGGCGGAACACCAAGGTAGAGGAAGGGCTGCAGAAA
GCTAAGCTTAAGAAAGAGAAGAGACAGAAAAGCGAGGTCTGATTTCGCCTATACTAAGTC
CACTGCGGCAGTACCTGGGCTATCCGGTCATCCCAGACCTCTTACCAAGGATACGCTCGT
ACTTCCTCCTCTTTACTCAAGTCCAACCCGCCCGCTACTTGTTCCTCATGCTTCTTGTCG
AGGAACTCTAGGAGCACATCTTGATACTGCTCTCTCCCCTTGTACTTGGCAACATCATCA
CCCCAACTCCGGACCGCGCTCGCCAGTCTGCCAGGCACATAAGGCTCCTCGGCAATCTCG
GTCACAGGAAGGAAGTACGTTCGAATGGTGAACACAACGCCGCCACTTCTCGGCAATCTA
CGCAGCGACTGCCGCTCAGAACGGAAAAAGTGATGCTTAATCGCTCGGTTCTTCTCAGCC
GTGTACCATCCGATCCCATCCTGGGCGTCTTCGCTACCGATGCTATGCGACCAGGGCAGG
CTGTCATCGACCTGCATGAAGTAATTGTTCCTCAGAACGGGACTCTCGGGCTTCACGCGT
CGGAAGAAGTTCATCATGCCCTTCTCCAGCTTGCTCTTGAACCCCGGCACGTCACCCGAC
GTGTGGATCTCGGACATGCACATCCCGAACTTGTCTTCGAGGCGCCAGAAGCCGGCAAGC
AGGATCGCGCCCGCGAGGAGGTAGTACTGTCCGTCGTCCTTCTCGATCATGATGGCCAGG
TCGTCCTGCACTAAGCGGGCACAGAGCTGCATCGGGTCTTCCTTGTTGCCGTTCATGGTG
AGCTCCGGGATGTTGAAGGACTCATGAGTGACGGTGTTGTCGATGCCGACGGCCGTCTTG
GTGAACATGCTCGGGTAACGCTCCGTGAGGTACGCCGACAACTCCTCGAGCAGCTCCACA
GCCGCGTCCCATACCTTGGGATCTGGGTCAGTGCGACAGCATT
>MATOU-v1_1407805
ACCGTAGATGCCCTCTTCTCTCAGCCCGAGCCGCAGCCCAGCGTTGGACCAAAGCCGGGC
AATATTGAACAGCCCGTGATAGTTGATGATCATGGAGATGACAGGCCGCTGGCTCGGCTT
GCACGCATTCGCGACAGTCTCACGGCAGCCATTGTCGGGCTCGACAGCACGAGCGACACT
CTCAAAGCGGCTCATCAGCAACCGAAGACGTCGATCGAGCTGGAGTACGCAGAGGACAAC
CGATCTGCCTTCTCCCCGTCTCGTAGCATCACGTCCTTCTAATGACAGTCCCGAACCCGA
GCCCCCAGCCGAGCCCTCCATCGATACCCGTACGCCCATACAGCGCTTTCGAACGCCGCC
GAAGAAGCCTCTTTCCGTCACAGACATCATCTCGCCGGCATGGTGCGAGCTACAATACTG
GTACAACCTGACCAGATCACGTCCGTCTAATGACAGCCCTGAACCCGAGCCCTCGGTCGA
GCCCTCCAGCGACACCCGTACGCCCATACAGCGCTTTCGAACGCCGCCGAAGAAGCCTCT
ATCCGTTACAGACATAATTTCGCCGGCATGGTGCGAGCTGCAATACTGGTACAACCTGAC
CAGATATGGTCGGGTGAGGGCCACCAAGGCCATGAAGCAGGGCTCCAGTGTGCACAAGGT
GCTGGAGGAGCAGGTGCACACTGAGGTACCCGTAGAGGTCCAAACCAAAGAAGACAGGTT
CGCTCTAAGGATCTGGAACATCATCACTGGGCTCCGGACGCTGCGGCGGACAGGCATGAC
GCGAGAGATGGAGGTGTGGGGAGTGGTCGAGGGCGAAGTGGTAAATGGCATCATCGATCA
GATCACGACAACAAGTCCAGATGAAATTATGGAGGCTCAGATGCTGGAGGAAGCAGAGAA
TGCAAAGTCAGGCTCTGCGAGTCGAGGCAAAACGCGAAAGCCACTGTCCTCGGATCAGCG
TACTCTGACAGACTACATGACCTCTTCCCAAACCGCATCCATTTTGGAGAGCGGACGAGG
CCTAGAAGGATGGCTAGGCACGTTGCATGAGCGGCCTCCAAACGTCTATCTCATCGATGT
CAAGACCAGGCAATCCAAGAGCCTGCCACCGCAAGGCAGCCAGACTCGGCCTACGTACTA
TCAGCTTATGATGTATCATCGGCTTTTCTCGACCCTTGCTACGAACGGGGTTGATGCGGA
ACGCATTTTTGAGCGGTATAAGGTTCAACCTGACAAAACCTTCAGCGACACGTTCATAGC
ACAAATGAGCACGTTCGACACAGGGGCAGACGTTGACCTCGCAGAGGATGAATGGGTACC
GCGCGACGCTTCTCAGGACTCCGTCTCCGAAATTCTAGCCCACAACAGCCTCGCCGCACT
GTGGTCCTTGATGATGCAAGAGTTTCAGAAAGCTGTGCCTGCAAACAGTGTGTCCTCTCT
CCTTACTGCCGAGTACAGAGCACCTGGCAGTGGCGACTTGATGGGCAAACGTAGCTTTGT
CTTCGATGCCGAAAGGCTCGATGCGTATGTGCAGGACGAGATGAGATGGTGGAAAGGCGA
GAGGGAGACCAAAGGCGTAGAGATTGAGGAGGCTTCAAGTGCCAGATCTGCGAGTTCGCG
CCGAACTGCACATGGCGGAACACCAAGGTAGAGGAAGGGCTGCAGAAAGCTAAGCTTAAG
AAAGAGAAGAGACAGAAAAGCGAGGTCTGATTTCGCCTATACTAAGTCCACTGCGGCAGT
ACCTGGGCTATCCGGTCATCCCAGACCTCTTACCAAGGATACGCTCGTACTTCCTCCTCT
TTACTCAAGTCCAACCCGCCCGCTACTTGTTCCTCATGCTTCTTGTCGAGGAACTCTAGG
AGCACATCTTGATACTGCTCTCTCCCCTTGTACTTGGCAACATCATCACCCCAACTCCGG
ACCGCGCTCGCCAGTCTGCCAGGCACATAAGGCTCCTCGGCAATCTCGGTCACAGGAAGG
AAGTACGTTCGAATGGTGAACACAACGCCGCCACTTCTCGGCAATCTACGCAGCGACTGC
CGCTCAGAACGGAAAAAGTGATGCTTAATCGCTCGGTTCTTCTCAGCCGTGTACCATCCG
ATCCCATCCTGGGCGTCTTCGCTACCGATGCTATGCGACCAGGGCAGGCTGTCATCGACC
TGCATGAAGTAATTGTTCCTCAGAACGGGACTCTCGGGCTTCACGCGTCGGAAGAAGTTC
ATCATGCCCTTCTCCAGCTTGCTCTTGAACCCCGGCACGTCACCCGACGTGTGGATCTCG
GACATGCACATCCCGAACTTGTCTTCGAGGCGCCAGAATCCAGCCAGTAGGATCGCGCCC
GCGAGGAGGTAGTACTGTCCGTCTTCCTTCTCGATCATGATGGCCAGGTCGTCCTGGACT
AAGCGGGCACAGAGCTGCATGGGGTCTTCCTTGTTGCCGTTCATGGTGAGCTCCGGGATG
TTGAAGGACTCATTGGTAACGGTATTGTCAATGCCGACGTCGGTCTTGGTGAACATGCTC
GGGTAGCGCTCCGTGAGGTACGCCGACAGCTCCTCGAGCAGCTCCACAACCGCGTCCCAT
ACCTTGGGATCTGGGTCAGTGCGGCAGCATTTGGCGCCGCGTTCGGCGATTCGCCGCGCC
TTGTCTTCGTGGTAGCGCAGATAGTGGTTGTCGAGCTCGATCCATTCGTCCCAGTTCATG
CTCCGGAGCCCCATGGTGATGTGGTACGGGCCCCATCGAAAAGGACGATAGGGCAGTGGC
TTGGTGTCGATCACCGACCAGTCAGGGTAAGAGGCCGCTTCGGGGCGTTTGAAGGTCGAG
GGGGTCCAGGCTAGCAGTTAAAAGTCAGTCATGA
>MATOU-v1_1410221
TCCTTATGTAAGGGCAATGATCTGCTTTTCCAACTCTTAGACCTAAGCATTTTGACTAGT
AAACAGTAGGCCAGCCGTTGTCGTAACGGATTAAGTTGATGCCAAGTTGCGCAGTGCCAG
CAGCGTTGTAGTAATGGTAGACAAGCACGTCAGCGTCGTTGTCGGTGAAGACAGCAGGGT
GGCCAGGTCCGTGGATGTTGCCGTGGCTGGCTAGAAGCTGGGTCCCGCCGCCCTCCATCA
TGGGCGTCCCAGCTCTGTCAACGTAGGGACCGGTGACACTGCTGGAACGTCCGACCATTG
TGCGGTAAGTGCTATCGACTCCCTGGCAGCATTTGTCGAAAGCGGCCCAGAGGTAGTAAT
AGTTGCCATGCTTGGTGATGTAGGGGGCTTCAATGGCGCCGCCGTTGGCAGGGCGTGCGG
CGATGGAAATGAGGTCGTTGCTATTGATGGGCTTACCGGTCGAAGGGCTCAGCTCGACGA
GCTTGAGACCGGACCAGAAGGAACCGAAAGACAGCCACCACTTGCCGTCAGTGTCTACAT
AGAGGTTGGGGTCGATGGCGTTGTAGTTGCTACCATCCGACGATTCGACCACGAGACCCA
AATTGGTCCACGAGCCGGATGCGCCGGTCTTACTCGTGGCCAGGAAGATAGCGGAGCGAG
ATGTGCCAAAGCTAGAGGCCGAGTAGTACATGTAGTATTGGCCGTTATGGTAGGAGAGAT
CAGGCGCCCACAAGTTCCTGTCGCCATTGGTGTAAGTGGTCGTCCAAGAAGCGCCATTAG
GAAACGCAGCACCGATGTCATTCCAGGTGGTACGGTCCGTAGATGTCTTCAGGCCAACGC
CGTTGGCCGTAAAAGCAGCGAGATAGGTGCCATCCGGTTTCTTGACTACAGTGGGATCGT
GGATGAAGGTGTCGCCATTGACGGGACCAGGGTCGACGGCTCGCTTCTCTAT
>MATOU-v1_1414439
AAATGGCCCTTAACCGGATCGTAAATCTTCTCCATTTCTTTCTCGCGGTCTACGAGCGCC
TTCGCCAGAACCATAGCAGCCGAGGCGTACTTCTGCTGATCCATCACGTCGTCGTCCATC
TCTGCACCGAGGATCCAGCACTTGTTTAGAAACCATGTACGTTCCATCGTACAGATCTCT
TTGCAGGCCTTGAGCATGTCGCCACTCTTGGCAACGCGAGAAAGATACGAGAGCCGGCCA
CCGACCATATCATAGACCTGTTCAAGTATTTTTGGCGAAGGATTTTCGTTGCGGAATTTG
ACACGATAGTTGCGAAGCGCAGTGATGGCTTTGGATTTGGAAAGGTCAAGGATGGGGATG
ATGTTCATGCGGGTGGCGTACTGCTTCAGGCGCTCATAAACCCAGTAGTCGTCGCTGTTG
AAAATCACAGTAGCCAGATTGCTCGCCGCCCATGCCTCAGCTCGTTGCTGTAGAAGTTCG
AGAAGGTCACGGCCAGCCTCGTCGTCACGGAGGAGGTGGGTGGAGTTGACAATGATGATG
AGAGGCTTGGCCACCCGATCGCGGCGTTTTAGAGCAACCTTCTCGAGCTTGTTGAAAGCA
CGCTCGACATCAAGTAATGCGCTAGCATCACGCGGTCCCCGGATAGAGAAGAGCGAGCCG
ATGTTGTCTTCATGAAACTCGAAGTCGAGCGCCTTACCGAGCCGTATGCGGAAGATTTCC
GGATCTGCATGTGCCTCAAGCATCGCGCAGCCCTCGCCGTCGATCTTTGCCATTGCGTCG
ATGAGCATGCTGGATTTTCCAGTGCCTTTCTCACCGACAAGGAGATGATACTGACCCTTC
AACTTACCAGACACGATGGCGTCAAGCAACTCTTGCTCCTCTCGTAATACCCAATGCTCT
CTGTGGCCTTCATCGTCGACGAGCTCGCTCCCTCCTGTGGCTTTTCGCTGCTTGTCAACA
GCCGCCAAATCGAGGACTGGGTCACCAGGTGAGAAGGCGTGCTCAATTTTCTGCAGTACC
ATGTGTTTGTAGTAGACGGTGTAGCCGTAACCCACAGCGCCTAGAATGGCTACCGAAGCA
AACGTAGTCAATGCCGCTTCAAACATCTTGAAGAGCGTAGGTCCCCAACTAAAGGGCGGC
TCCTGCTCATCCTTCTTTGATTTGGCTTTAGCCTCGGCGGGTGACTTGTTGGCATCCGGC
TCATCTGGCGCGAGGGGCATGTTGTCTGTTGGTCCAAAGGGCACATTGTAGTTGAAGCGG
CGCTGTATGTGCTGGCGCGGCACCATATGGCGTTGGACCAGCTGAAAAGGCGCAATAGGA
CATCTTTGAATTCGAGTAAGGTTCCTAGAAGGAAACAGCCTAAGGGCAGAGAACGAATGT
AAACGGGACATGGTCCCAAAAGCCGTAGGGAAGAATTAGTCCAGGCGCGGTATCATGCCT
CCAGGTCTGCGAAAATAATGCCGTATAATTCCAAGGAGCTGTGATATGCTATTGATCCGA
G
>MATOU-v1_1415574
TTATCCATACCTCGTCCAGCTAATGCAAGCTATCCACCGAATCTTCCCCTTCGCTAGGGG
GCTCTTCGAGGACAAAGTGGCCAATATATGGTGCGCAATACACAGCTCGGGCGTCTACAA
GCTTAATCGATACGACTCCACCTTTCTCAGCCGGGCAGCGCTTGGCCTAACGCTCGCCTC
TATCGCCCCGCCTTGCTTCCTGCTCTTTGTGAAGCCCAGAAAGGAGGCTCTTCCGTATGT
GCTGTCCGCGACGGCCTGGGGCTTCTTTCTGTGCTCTTACCAGGTGCACGAGAAAAACGT
GCTGCTGCCTCTGTTGCCGATGACGTTGCTATTGGCCATGCAGGACGGAATGAACGCTGC
GAACCGGGCCTGGATAGGTTACGCTAACGTTCTGGGTTGCTGGACAATGTTTCCCTTGCT
AGTCAGAGACGGGCTACGGATACCGTACTTTGTGCTGACCGGCTTGTGGGCATGGCTGAT
GGGCCTACCGCCTTTTGGAACAAGCACACTTTCAACTCCGGCGGAAGAGGGCGGACTCAG
CCTTGTTAGTAAGGCTGTACATGTTGCCACCTACTTGGGCATGGTGGGATGGCATATCGT
CGAGGCGACCTTACCGCCACCTGCAGATAAACCTGACCTTTGGGTTGTGGCTAACGTCTG
TCTTGGCTGCGCTGGCTTCGGTCTCTGCTATCTTTGGTGCTTATGGAAGACCCTCGCAGC
CAGTGGGATCTTGTACGATGTTGGAATCTGGAAGAAGAGCAACGCGGTTGGCGAGAAGAA
GAACCAATAATCTTCTTTGGAGTCTAGCGTTACAGGCATAGCGTCTTCGTTGTGTAGAAT
TATAGAGGGACTCGTGCATAAAACTTCCTCGTTCTGTATAGATATCGTACACCCCATCTT
ACATACCACAGCACGGTTGTAACCCAAAAGTTTCATTTCGTCTTTTCAAACGAACCCTTA
ACTCCTTCCCAATGCGCGCGCTCAAATGTATTCAAATCGCAAATCATCCTCTTCTTCACG
CCAGGTTGAAACCATAACTCGCCATGCAACTCCGGTACTTGGATACCATGTCCTTACAGG
CCTCCTGCGGATCGGCGGC
>MATOU-v1_1417320
CGTTGATGGCAGGAAGGCCATCTTTCGCTTTGAGTAGGGTTCGCAACACGAACACGCTCC
ACATGAGCTTGTGCCTAATCAGTACTGTGCCGCTACAAATATGTTCAGGCGACTACGCAG
CCTCCAGCTTGTATATGAAATCTATCCGGTTGGGCAACAGCAACACATCAACACCTGGCC
ACGGTCGAAATTCCACAGGCTACCGTCCCAGTTTCTTAGATTCCTGCTAGATGGCAGAAT
CCACTGACGCCTTGTCGGAAACCTTGCTCCCACTCCCAAACAAAGCCACCGCCCTGTCCG
CTTTCGCGCATGCGCTTCAGCACCCAAATGTCGAGCATTCCGATCTTGTCGCCACCGCCT
AGATGGCCTCCGCTCTGCTGGCTACGCATGCCAAAGAAGCTCATTGCGTCGTGGAAACCG
ATGTCCCAGCCGTCCGCGAATCGCTGATGCTCATAGTGCCCGCCTTGACTATCCCAGTAG
CCTGCGTGGTTGCTAAAGGCAGTATGCTTAGCCTGCTCCATGCCTTGCTGAGCGTGTTGG
ATCCGCTCGTTGACATCGTGGACGGTCAAGGCCTGCGGCGGTACGATAGCGTGGCAATCA
GTCATCTGCTTGAACCCCCATTCGCCCCCGTCCATCCAGTCCATCCTGTAAGTCCAGAAG
AACGTGCCGCCTGCTTTTTGCTGGAACCGGCCAGATTCGGCGTTGCCGAATTGTCGGACC
AGGTCGTCGTTCTTGCCGCCGCCATTCTCCCATGTCGGGTCGGAAAGGACGCATGAGTAC
TCGCCTACGATGACCTGCGCAGCACCCTTGTCGATGACAGAGCCTGCTTTGCCGTCAAGG
GGTCCCATCTTATGCCATACCTCCTGGCTGATATCCTGAGGCGTCTTTTGCTTATCGGCA
TCCGAGAAGCACCAGTAGTAATGTGTATCGACCACAACTGGGCATCCAGGTGCATTTCTC
GGACTGTTCTTCTTTTGGCTCCAGTCGAGACACCTGTTGAGATCCCATGCGTCGCTCACG
TACACCGGCATCGTCGGGTCGACCTTAGAGATCTCCGCAATTGCAGAGTCGTACCAGTCG
TACATGCCCTTAGCATCCCACTCGGCTTCGTTGATAATCTGTAGGCCAGCAACCCCTTCC
ATGTTGCGACTCTGATGCGCAATGAAGCAGAGGCAGCGAGTGCCAAGTTCGCGGTAAGAT
CGTGTCGACCAGAACTCCGCCTTCCCACTGTTAGTTCCGGAGTGGTCTTGGGGGTTCGCG
CCACCTGGCAGGCCGTGTAGATCGATCACCACACCAATCCCGTGCGAGTGGCACCTATGG
ATGAGCTTCTTGACCGCTTCCCAAGCATTTTCATACACAGCGCTGTACTTCTCAAAAGCC
GTGTCTTTGCAGTACGCCGGTCCAAGCGTGAAATAGCCGATCGGCAGGCGGATAGTGGTG
CATTTGTTGTCGCGCAGCCATTCGAGATCAGAATCCCTAATCCACTCGTTCCAGTGCTTC
TCAAACCTCTCCCTGGTGGATTCGATACCTTCCTCCTTCACCCAAGCTTTCACGGCTGCT
CGCTCCGAAGAGCCCTCCGAGCCCTCCGGGAACATGTGCCCGCACAGCCAGCGCTCAAGG
ATGAAAAGGGAGCCGAAATTTGCACCATGGTGATAGCGGTAGCGGGTCACGTCTGCCGGA
GATGGTGGCTGTATACCTCCAGCCGGGGGCTGCCCAGGTTGCAAGGGTTGCTGGCCACCG
CCGCCACCGCCATGCTGTTGCTGCTGTTGAGAAATGAATTTGGAGGCGTGGTCTTTGCCT
GGAAAGTCATTCTCGTCAACAAAAGACTTCGCCTTATCAAAGAATCGCTTCATGATCTCT
CTATGCAGGCCAGAAGGCAAAGAGTGGGCACGGCTTCCTGTTTACTGTTTCTATAGATTT
GCTTCAGTGCCAACCTTATCTCAGGATCCTGCCAGATGGCGCGAGCTAGGAGGTAGACGA
AAATGGCAATGAAAA
>MATOU-v1_1418358
GGGCGTGATAACTCGTTTGCGATTATTTGGTAGGCCGCAGTAGCGGATGGGCTTCCGTGT
TAAGCACATAATCATCCAAGCTGACCAGGTCCGGCTCGCTAAAGATCAGGTAGAAATACT
TGAGCGTCTCGGCCGTCCAGAAGCTCTCCATGCTATCGATCATGGTCGAGTTCGTCTCTC
TGACGTCCTTGATGCCCGCGAAAGAAATATTGGTCCGCGTCCCCGAAGTGATGGATTGGA
ACATGTTCCAAGCTTTGTTCTGGTAATAGGTATCGCCGGTGATGCGGTAAAGGATGAAGA
CGGATTCGATGGCTTCGGGGCGGAGCATGTACCGACTGTCGGAAATGCGCGTGAAGCCCG
GAGGGAGTTTGGAGGTTTCGATAATGCTCATGGCGTTGGTGATGACTTGCTGAGGGACGT
CGGCAGACGCGCCTTTAGGAGGATTGGGTGAAGCGATGGCATGGTACCACTTTTCCTGAG
ACCAGGTACAGTCGTCCTCTTTGTCTTCCTTACAAGGCGCTGCTTGGAAGATCTCAGGCA
TGATGCCCGACGGCGTGCTCTCATAGGCCCAGATACAACCTTCCACGAGCTGACGAGCGG
TGTCCAGTTCGTCCGGTGTATCAAAGGCCTTGGCAGCAAGTGCTACCATGCCACCGGCAT
AGCAGGATAGATGCTGAGCTTCCGGGGTGAATCTGAAACGAGTCGGTGTCCTACGTTTCG
TCCCGGGGATGAGCAGAGCTTTGTTGTCGGAATTGAGCGGTCTGAAGAAGATGTGTTCCT
TCATAGCCTTAAGTGATTGGGCATACATGTCGCGATACTGCTGACCTCGGCCGCCAAGCA
TCAGGAATTCCTTGGGGAGATATTCGTACAACGAATCTACCATGCCTCCGATGGAAAATG
TTGTTTCTTTCGTGAAATCGGTTTCTCTCGTGTCGACTTGCATGGGCCAGAGTCCAGAAA
TCTTCGTTTGGTTCTGTTGCTCTTCAAAAACATGCATGATACGAACAATAGCGTCATACC
ATTTGGGGTCTCCTGTAAGCTGTGAGAGTCGCGTGAACTCCATCGTCAATGAGCCGACTT
CAGCCACAATGGAGGACCGCGAAGCCTTTTGCGGCTCGCCCAGCATGGCATTCTTCCATC
TCCAGCGCGTGATTGGCA
>MATOU-v1_1422020
TCTCGACTTCATTGTTCCACCACGACCTCCGGAACCTCTTTCCACAGCTTCATCATGCGT
TCGCTCGCTGCCTCGTATTTCCTTACTTTGGGCACCACTGCGGTTGCCTACCCTCCTCCC
TTCCATCATGGAGGAGGTGGCTCCTGGGGCCATCACGGCCAGGCGGATCCTAAACAACAG
TGGGATCTCTCCAAGTTCACCTCTCTAGTTGTTTTCGGTGATAGCTATACCGACGACTCG
AGGTTGGGATACTTCATTAACAATGACGGCGACGCACCGCCCGTCGGCTACGAAAACCCT
GCCAATTACGCCGCTGCAGATGGTGGACGGCCCTGGCCACAATACGTCGCCCAGTACAGC
GGCGCCAACATCTACAACTATGCCGTCAGCGGCGCAGTGTGTTCCAACGACATCACCCCG
CGATGGTTCAGCGCAATCGATGCTCCGTTCCCGGACATCAAGGGCTACGAAGTCCCCGCC
TACCTCGCAGACTCCGAATACGTCCTACCCAACGGCACGAAATTCATGCAGGACCCCGTC
GACGAGACCGTCTACGCTATCTGGATCGGAACCAACGACCTCGGCTACGATGCCCTGATC
GAAGACGAGCAGGTCCCGGGCACCAACATCTCCACCTACCTCGACTGCGTCTACAACCAG
CTCGAGCGCGTCTACGACAACGGCGGGCGATACTTCGTCATTATGAACGCGCCCCCCTTG
AACCTCGCCCCCGAATACGGGATCCCAGGTCAGGGCGGCGTCGGTCCGAACCAGTACTGG
CCTGACAAGGGCGAAGGCGTCGGTGGCAACCTCACGGAGATCTCCGGCCGTATGTTGGAG
CAGGTCGTTACTGTCAATAGTATCTACGAGTATCGCACCCCGTTCGAGGCCAAGATCGCC
GAACGATACCCCGGAGCGAGTTTTGCCGTGTATGATGTTCATGGATTGATGACCGATATC
CACAACAACCCCTCGCAATACCTCAACGGCTCCGCACCCCTCAACGTCACAGGTCATGTC
AACCAGTGCAACGTCACGGGCGGCGACTGCGTTGCGAGCGATAGCCCGGATAGCTTCCTG
TGGTACGACGAGCTGCATCCGAGCGAGCAGGCCGAGCGAGTCGTCGCCAGGACTTTTATT
GATGTCGTCAAGGGTGCTAGTCAGTGGGCTACTTACTGGTCTAGCTAGGCGTGTCGATGC
GTTCGGCGGGTAAGAGGAAGAGGTTTGGGCTAGGGGCTGATGTGGCAGTTAAATCTCTGT
AAAGTCGGAAAAATATTGTCCAAGCTG
>MATOU-v1_1423951
GACATGGGAACCAAGCAGTAGGGTCAGTAACGTTTATTGACTCGAGCATAAGCAATACAG
GAGTTGGTATCAAGACGGCTTTTGGGCCCAATTCTCAGCCCCCTGCCGCTGGCTCCTTGA
TTTTGGAAAATGTGGACTTTAACAACGTTCCGATCGCTGTTCAGGGTGCCAATGGAACCA
CCGACCTACAAGGCAACACTCACGTGACAGCATGGGGCCAGGGCCATTCATACACTCCAA
ATGGACCGAATAACTTCAAGGGAGCCATCGAGCCTGTCAATCGTCCAACGTCTCTGGTAC
AAGGAAATGGACGATACTACACCCGGAGCAAGCCGCAGTATGAGCAGCACTCACTAAAAG
ATTTAAAGATTTTGTGAGCGCCCGCGACTATGGGGCTACCGGTGACGGCCATACTGATGA
TACTACAGCTCTTCAGCGGGCGATCACAGAAGCCGCTGCCCAGAACAAGATACTTTTCCT
TGACCAGGGAGACTATATCGTCAGGACAACCATCCACATCCCAGCAGGGAGTCGCATCGT
TGGGGAGACGTACAGTGTCATCTTGTCTCAGGGTTCTTTCTTCAATAACATGGACAGTCC
GCAACCAGTGGTGCAGATCGGTACGCGCGGCGAGACAGGACAGTCCGCAACCAGTGGTGC
AGATCGGTACGCGCGGCGAGACAGGATCGGTCGAATTAAGCGACTTCATTGTTTCTACAC
AAGGTCAACAGCAAGGTGCGACCTTGTTTGAATACAATCTGATATCTGCGGCGAGCTCAC
CTTCTGGCTTGTGGGATGTCCATGGGCGTGTGGGTGGTTTTGCCGGCAGCAACTTGCAAT
ATGCACAATGTTCGAGCACACCGGGTACCACGATTGACTCCGGTAACCTCGATCGGAACT
GCATTGCAGCTTTCATGGGGATGCATATCACAGAGTCAGCCTCTGGCCTCTACTTGGAAA
ACGTTTGGCTTTGGACAGCTGATCATGACATCGAGGACCCTGGCTTACGGCAAATTACTA
TATACGCAGGCCGCGGCCTGCTTGATCAGAGCAAGGCAGGCACTATCTGGCTTTACGGCA
CCAGCTCGGAGCACTTCACCCTTTATCAGTATCAATTTGCCGATGGAGCTAGGAACGTCT
TTGCCGGCCAGGTTCAGACCGAAACGCCATACTACCAGCCAAATCCCTCGGCACCTTTAC
CCTTCCCGTATGTGGCCTCTTTAAGTGACCCCAAATTTCCAAGCAAAACTGCCACAGACG
GCAGCTTGGTCATTCCGGATGCTAATGCCTGGGGTTTGCGTGTCGTTGACTCCTCCGCTA
TATTCGTCTATGGGGCCGGACTCTACTCGTTCTTTAACAATTATAGCACCGCTTGCTCGA
ATCAAGGGAACGGAGAGCAATGCCAGAACAGCATCTTCGATCTCGAGAACAGCAAGGATA
TCAGGGTGTACAATTTGAACACTGTGGGAACACACTACATGCTGGAGATCAACGACCAAG
TTTCCGCGATTTATTCACAGAATCTGGACGGCTTTGTGGATACCATTGCCTTGTTTCGAA
GCAGTTGAGTGCCATTGGACAGCAGCCCATTGAAAAGCTTTGACAGTTCGACCGCAATTG
ACGTTACTTGACGCAGAACACTCTTCCTGTTTTGACGCTCGAACCGCCAGTTGCCGCGAT
TGCGGCTCGAGCGTGGGTACTTTAGGGATGTAGCTTTCGGTACAGCTTACAAGCGCCATG
ATATATGTCCTAAAAGGTGGAAATGTAACCAGGCTCGCAAAAGGTTCTTGCACGCGATAT
GCGAAGTTTGACTAGATATTCTCTTCTTACGCTTGTACAAGTGTCGCTCACCATTATCTT
TGATGTTGAGCTTGAACAC
>MATOU-v1_1428607
CTGGACTGCGTTAGCGAAATGGAGCAGTCACCCGAAGTCGGTATCATGCAATTCAGCTCT
GGTGTCATGCAGGTCGTCGGCGATTTCTTCGAGAACGGTATCACCTTCTTCACCAACCTC
ATCTACACTGCCATCCGTTACACCGTCTCCAACGGTGACGTCGCTCCCTTCGTCGGCCAC
AACGCTATTGTCCGCTGGTCCGCTATTCAGCAAATCGGTTCTTTCGACGGTCTTGATGAC
TACGAGAAGTTCTGGTCCGAGGCTCACGTGTCCGAAGACTTCGAGATGTCGCTGAAGCTG
CAATGTGAGGGCTACATTATCCGCCTGGCCGCATGGGCTGGTGAAGGTTTCAAGGAAGGT
GTCTCGCTTACGGTCTATGACGAGCTTGCCCGTTGGGAGAAGTATGCCTACGGTTGCAAC
GAGCTGCTGTTCCACCCCATTCGCACCTGGCTGTGGAGAGGACCATTCACCCCGCTGTTC
CGCAAGTTCCTCTTCTCCAACATCCGTCTGACCTCCAAGATCACCATCATCTCCTACATC
GGTACCTACTACGCCATCGGCGCTGCCTGGATCATGACCGTCGCCAACTACTTCGCCATT
GGATGGTACAACGGCTACCTCGACAAGTACTACATCGACTCCTGGAAAGTCTGGTTCTCC
ATCGTCATCGTGTTCAACGGCCTCGGCAACTTCGGTCTAGCCACAATGCGGTACCGTATC
GGCGAGCGGAACTGGTTCGCCAGCTTGATCGAGAACTTCAAGTGGACGCCCATGTTCGCC
ATCTTCCTCGGCGGCCTCTCCCTGCACGTCTCCCAGGCCATCTTGTCCCATATGTTCGAG
ATCGACATGAGCTGGGGCAGCACCAGCAAGGAAGCCGAGCAGACCAACTTCTGGAAGGAA
ATCCCCAAGACCTTCAAGGCGTTCAAGTACTCCATCGGCTTCGCGACTTTCTTCATCATC
GTCATGATCATTCTGGCCCTCGGCAACTTCATCCCGTACAGCTGGAACATCGGCAGCTTT
ATCGCCATCTTGCCCCTCAGTACCGTCTGCGCAAGTCACTTGCTCTTGCCTTTCGTGCTG
AACCCGGGTATGATGCAGTTCACGTTCTAAGAAGCTGGATACTCTTACAATGAACCGGAG
CTCAGCTGGTTTCCAAAGGGATTCTTCCTTATTTTCCTTATCATGACGATTGTACATATA
CCCTCCCCCCTCCCTCTCATTCATCTTGTGAGAGGCAGACAGGCGGGAGAGGGGGTTTCC
TTATCTCTCTTTTTTCAAACA
>MATOU-v1_1430498
TTTCATTTGATACCATGTACAGTGTCACACCAGCACAGACGCCGGATTGAGCACTGCCTG
AGACATTTCTTCGTATCTACATCTAGTGCTGACTGAAAACCCAGAGCCTAACAACTTGCC
ACTCCATATACGCACAAACTTTTGAATACGGCCATCTTTGCGAGTCTCTTCAGACAGATT
CGAGATTTCTCCCATCTTCGCCCTCACTCCGTCGCTGTAGCTTCTTCTTGTCGAAATCCT
GCCATCTGACTTTCACCGTTCCGGAAGTATTGTCATCGTCATGATATTTGAATAACATTT
TGCCTCCAAATGCCTCACTAGCAGGCGGATGGCACTTTGGCTTGAGGGCAGAACGACGAA
TTTCAGCCCTTCGTCGTTGGATCCAGTACATTTGTTCATGCTCGCGCAGGTATCGATGGC
CGTGGAAACTCCGCAATACGACTTCGCGGAGCTTTAGACCCAGCATACGTCTGTCTTCGG
CTTTCTCGTACATGCGCCTTGTAATTCGTTCGACGTCTTCTGCCGAGAAAGTGTCCGGCA
GGGGTGCAGACTCTCCCGATCGGGTGTGCTGAGCCCAAGATCCCATCATTGCCAAAACAC
TGAGCTGTGCGCGGGCAAGTGACTCTGGATCATTTGGGGGCACCACTTCTCCATATCGCT
TCTTGATGTCGTCAGGGTCAGTGAGTACCAGCGCGGTGGCACCAACTTCTGTTGCAACGA
TCGGAACGCCAGACAAGGCCGCCTCGCCAATCGCCAAGGGCAAACTTTCAGAAAGCGACG
AGTTCAGGAAGAGCCAGGCATCCTTCAAAACCTCCTTCGGACTTCCGAACCCGGCGAGAA
TCACCTTACCGGCCATACCGCGGGAATTGATGAGGTTGACAGTCTCGAGCGCATAGCTTG
GCTGCCGGTCTTGTGCACCGTAAATGACGAGTCGATAGTCCTTGAAGCCATATTTGTTGA
TGATGACATCGGCGGCACGTACCGCAGTCTTGACATCCTTGATGAACTGCACGTTCGACA
GCATCACGGTCGTCGGCAATTTGCTTCGAGTTTCTGCAATAGGTTGGAAGGTGTCCATGT
TGCTGATGCCATTGACGATCGGGTCTATCTTCCGAGCGAAGGCTTTCTTACTTCCGCGCA
ATCCTTGATCGGTGCCCAGATCCTGTTCCCAATCTGGA
>MATOU-v1_1439158
CACAGACTGGATGAAGAGCAAGATACCGAGGACCTGGCGCAGCTTACGCGGACGCTTGTT
CCGTTTTATCTTGCGCACAACGCCGAAGCCGACGCCGTCGACATCCTATCGGAACTTGAG
ATGATTGATGAGATCAAGGAATACTTGGATGAAAACACATACAGCCGAGTGTGCTTGTAC
ATGGTCTCGATGGTCCCACTACTTACATACCCTGATAACGATCGATTCGTTCGGACAGCC
CACGACATTTACGTTCACTACAAGCAGCTCACACAGGCCATGTCTCTCGCCATCAAGCTC
AACGACATGGACCTGATCAAGGCAGATTTCGCTGCGACGAAGGACAAGGCGCTGAAGAGG
CAGCTTGCTTTCATCCTCGGCAGGCAACGGATTTGCTTAGACCTTGAAGGCGAGGACGCA
GAAGACCCCGAGCTGCAGGATTGCATCAACAACACCAAGCTTCCTGAGCACTTCAAGTCA
TTGGCCAAGGAGCTCAATATCCTGGATCCCAAGGTGCCTGAGGACATTTACAAGTCGCAT
CTGGAATCCTCGCGGACAGCAGGCATGACAAACACCGACTCGGCCCGCCACAATCTTGCC
TCTGCGTTCGTCAACGCCTTCGTGAATGCAGGGTTTGGTGAGGACAAGCTTATGTTGGTT
GAGGGTGGAGTCAAACAGAGCTGGATCTGGAAGGTGAAGGAAGATGGTATGATCTCGACA
GCTGCTTCTGCTGGTATGCTGATGCTGTGGGATGTTGAGATGGGCCTGGACAAGATGGAC
GCATACACATACGTGCCAGAAGATCAGATCAAGGCGGGCGCGGCGCT
>MATOU-v1_1439160
CTTGGCAGGACTTTGAGGCGACGCCTGATGGCTTTCCTATGGGTATGAAGGCTTTCACAA
GCGAGGTCAGGAAGCGACATCCCAATGTTAACCACATCGCCGTATGGCATGCCATTCTAG
GTTACTGGGGAGGCGTAGATCCGAATGGCAAAATTGGACAGAAATACAAGACCGTCGAAG
TGGAGAAGGAACCTGGTGTTGCCGGAGGCAAATTCCACATCGTTGCCGCCGAGGATGCAA
TGCAGATGTACGACGATTTCTATCGTTTCCTTTCCGAGAGTGGAGTCGATTCCGTTAAGA
CTGACGCTCAATTCTTCCTCGACCTGCTCCTTCATGCACCGGACAGAAGAGCTGTGACGA
CTGAGTACCAAGACGCCTGGACACTTGCTCACCTCCGCCACTTCAGCAGCAGAGCCATCA
GTTGTATGAGCCAGGCTCCGCAGATACTTTTCCATTCGCAGCTTCCAACCAACAAGCCCA
GATTATTGGTACGAAACAGCGATGACTTCTTCCCCGAAGTCGCAGCGAGCCATCCCTGGC
ACATCTTCTGTAACGCGCATAACGCATTATTTACGCAACATCTGAATGTACTGCCGGATT
GGGACATGTTCCAGACTTCGCACCCATGGGCTGGGTTCCATGCGGCAGCTCGTGCAGTCT
CTGGTGGTCCAATCTATTTCACCGATGAGCCCGGCAAACACGATTTGGAGCTCATAGGGC
AAATGACCGCGCAGACTCCCCGAGGGAAGACAGTCATTCTCAGACCCCACAGAGTCGGAC
GGACGATCGATGCGTACAATGGCTATGATAACCAGGCTTTGCTTAAGATAGGCACCTATG
TCGGGATGGCTCGCACAGGGACTGGCATCCTAGGCGTCTTTAACGTCTCTCAGCAAGACG
TAAGCGAGTTTGTCCAGCTCTCTGACTTCCCGGGAACAGAGGAAGGCGAATACGTCGTGG
GCTCTTTCCTTTCGGGCGAGGTCACTAAGCCCATGACTGGAGGAGGCAATCAAGCGATGC
TTGGCCTTGAGCTTGGTGTGCAGGGCTGGGACATCCTCTCGGCTTATGCACTGCGGTCGT
TCTCTGTGAAGGAGAAGAAGGTTCAGGTGGCAATGATGGGTTTGCTAGGCAAGATGACCG
GCTCTGCCGCGGTCAGTGGGCTGGACATGTATGTCGAGAGCAATGGCCGCCTGAGGATCT
GGGTGAGCTTGAAGGCTCTTGGGACTATGGGTCTGTATGTCAGCGATCTGGCGAAACGCG
ATATTGATCAGCAGCTCATGATCATGATCTTTGGCAAGCCGATCTCGAGAGACTGCGTGA
GGGCCAGTGCGAGGGATGAGAATGTGCTGGAGATAGATGTCGAGAAGGCTTGGAAGGATA
GCGGAGAGGAGGCGGGATGGAGCAATGAGGTTAGCGTGGAAGTGTTTATTTCATGAGGGT
CCCCTGGCGATCTAGATGGGCACGGAAGAATTAATACGACAAAACATCTGGTTTCGACCG
GCATGTTATCCGTGCATACTGTGTAAATGCGGCGGTAGC
>MATOU-v1_1445914
ACCGCTGGGTCGGTTTCAATGGAGATGTATCCCGCCTTGCCGTAAGGAAGGCACAGTATC
ACTGGGGATGGGATTGGGGTCCGGAGCTGATGACTTGTGGCCCGTGGCGTGAAGTCCGGC
TGGAGAGCTATTGCGCGAGGATCAAACACCTGCGAGTCGACTATCATGTTGCACATGATC
TTCAATCTGTCCGCGGGACTGTTCAGGCAGATATTGAAGGACCTGGCAAGCAAGTGGAGT
TTACTGCTGCACTCGATGGTGTAGAAGTGCTCAACGAGACTACCGACGTCGATGATGATG
GTAAAGCAGCAGTGGAGTTTATCGTCAAGCAGCCGAAGCTCTGGTATCCTCATGGCTACG
GTCCTCAGCCGCTCTATACCGTCACTGCAAGCCTTATGGACGGATCAGACATGCTGCACG
GCCTTTCCAAGCGTACCGGGTTCCGTAAGTTGGATCTTTCTTGTTCAGGATCCCGATGAA
GTTGGCAAATCGTTCTACTTCCGCGTCAATGGCGTGGATGTGTTTTGCGGGGGGTCAGAC
TGGATTCCTGCCGACAGCTTCACGCCCAGAACGACAGCGGCGAAGTACCGGACGTGGTTG
CAGATGGTGGTCGATGGGTACCAGATCATGATCCGGATATGGGGTGGAGGAATTTGGGAA
GAAGACGTCTTCTACGAGCTATGCGATGAGCTTGGTATTTTGGTTTGGCAAGACTTCATG
TTTGCGTGCGGGAACTATCCGGCCTATCCGGCCATGCTGAAGTCCATTGAACAGGAGTCT
GTCTGCCAGACGAGACGCTTGCGGCATCATCCATGCCTTGCCATATTCGCAGGCAATAAT
GAAGATTATCAGGTCCAGGAATCGAGCGGTTTGACGTATGACTACAAAGACAACGACCCG
CAGAACTGGCTGAAGACGGATTTCCCGGCTCGATATATCTACGAGAAGTTGTTACCAGAC
GTAGTTGCTGCTCACTGTCCGCATGTCCCGTACCATCCTGGATCACCATGGGGTGATGGC
AAGATCACCTCCGACCAAACCGTCGGCGACATGCATCAATGGAATGTATGGCACGGCACC
CAAGAGAAATATCAGATTTTCGACCAACTCGGTGGCCGGTTCAACAGCGAGTTTGGCATG
GAAG
>MATOU-v1_1458136
CCCGCCGCTCGCCCTACAACACCGACTCCCCTCGTGCCGTCGCCGAAGACGAGCTGCTAC
GCCTCGGAGGGTGCGTTTTGAACCTCGCCGGTCTATGGGGCGGAGAGCGGCAACCCAAGA
ACTGGGTCGGCCGCGTTGCCAGGAGCAAAGAGGATGTTAAGGGCAAGAAGAGTCTGCATA
TGATCCATGGACACGACGTGGCGCGCGCAGTGCTCGCTGTGCTGAAGCAATGGGATACCG
CGAAGGGACAGCGGTGGATGCTGACCGACGGCTTCGTGTACGACTGGTGGGCACTGATGT
CCGGCTGGGCAGACTTAAAGGCGCAGCAAGGAGAAGAGGTTCATGATGAAGAGCCAAGCG
ACCAGGCCAAATGGGTTTACGAGCTTATGGACGAAGAAAGAGTCTGGGCGCTCCCCAGAA
GTATGGAAGCGCTCGGCAGATGCTACTTTGGGAGAGAGTTTTGGGATTACTTTGGACTGG
TGCCATTGAAGGCCAGAATATGAAGCTTCTGTCTATCAAACAAAGCTTTTGAAAAGCACA
AAATCGCTGTCTAATATGGCCCGGCTGTATGATCTTGCCATGCTATTACGACAAGCTTAG
CAATAGCTGCTGTTGACCTTGTTCGCCGATGGGATACCCGCATTGTAGAGACCCTCCCAA
CTCCAGTAATCCTGGAGGACGCCTTCACCATCCACGGTGTCAACACTGTTCTTCATGCGA
TAGTTCCAGAAGGCACCACCAGAGGCATACTTCTGGTAAGCATAGACCTGCGTATCGTAG
AGCGTCTTGCGGTTCTCGAGGGTGTTGTTGTACAGCGATTGAAGCGACCATTCGCCAATA
AAGACAGGGAATTTGCCGTCGCCTTCGCCGATGTATTTTGCCTGGCCACAGATAGCCGGA
GCAACATACTGCGAATATGCGCCGGCAGCTGCGAAGAAGTAGATGTGGCTATCAATCACG
AGGTTCGTTCCAGCTGGGTAGAATGGCGACCAGTACATTTCGGAGAAGAACGCATCCTGG
AGCATTAGCGGAACACGCTTGTCGTAATTAGCAATGCGGTCGAGAGTGCCCTTAATGTAG
GTATTGATCCAGTTGGTACCGTTCTCGGTGAGACCAGCAGGAGTGGCGAAGGCGGCGAAG
TTGTCCGAAGGCTCATTCAGTGGAGCAATGGTGAAGCCGTACGGACGGCCAGAGTTCTTG
ATGAACGAAATGATCGAGTCGATGGCCTTGAACGAGTAGTCGAGATTGGTGCTGTTCTGG
AACCAAGCGTCATGGCCAAAAGCTTCGCCAATTGAGAGAGTGTTGATACCACCGGGCAAA
GAGTGCAGACCAATAATGACATGCATGTTGTACTTGTCAATGGCATAGTTGGTGATGGTG
CGAAGGTACTTCTGCTGATTGCCGGAGTAGAGCTGGCTGC
>MATOU-v1_1467509
CAATCCACCGTACGGGGGCTATCCTAAGTTTGTTTCCCAGGGCTTTAACTCCGCTTACCT
TCCACTGTGGCTCCAAGAAGCAGGTTACAATACTTATTATACCGGGAAACTGTTCAACGC
CCACAGCATTGATAACTATGACTCTCCCTTTGCTGCCGGCTGGAATGGGAGTGATTTCTT
ATTGGATCCGTTTACTTACGAGTATCTCAATGCTACGATGCAACGGAATCGCGATGATCC
TGTCAGTTACAAAGGCCAGTATTCTGCCGACGTTGTCGCCAGCAAGGCGTATGGCTTCCT
TGATGAGGCCATTGAGGCTAGAACCAAAGGTGACCGACCTTTCTGGTTAGGCATTGCTCC
AATGGCTCCACACTCAAACAACCACCACAACGAGCGAAGTATCGATGGCAATTTCACCGA
GAAATCCGTGACTATGTCTCCGCCTGTCTCTGCACAACGCCACAAACATCTCTTCCAAGA
CGTCAAGGTGCCCCGGACACCCCATTTCAACCCCGATCGTCCAAACGGCGTATCCTGGAT
TGGCCAGCTACCGCAGCAAAACGAGACAAATGTAGATTATAATGATGAGTGGTACCGTTC
CCGACTTAGAGCCCTTCAGCCAGTCGACGAGATGATCGACGAGGTGTTCCGAAAGTTGGA
AGAAGCTGGCATTACCGATGAGACGTACGTATTCTTTTCCACGGACAACGGCTATCACAT
CGGGCAACATCGCTTGCAGCCCGGCAAGCAATGCGCGTACGAAGAGGACATCAATGTACC
ATTCATTGTTCGCGGACCAGGCGTGGCCAGTGGTCAGAGGACCGATCTCGTAAGTACGCA
TACAGATCTTGCGCCTACGTTTTTTCATCTTGCTGGCGTGGATGATCGTACAATGGAGAA
GTACAAGTTCGACGGCCAAGCCATGCCCCTTACTCCCAATTCTGGAAACAATTACTTCGG
TCGACGGACTGAACATGTGAATGTGGAAATGTGGGGCATCATCATGTCGGAAGGCAAACA
TGGGCAGGTTTTGCATCCGAACCATACGTATAAGGCTCTTCGTCTTGTCGGCGAAGACTA
CAATCTCCTCTATACCGTCTGGTGTAGTAACGAGCACGAGCTTTACGACCTAAACAGGGA
TCCGTGGGAAATGGAGAATCTATACACTCGGGATGATAACCGTATACTCAGCTTTGTGGA
GACGAGCAAGGGTTCAAAGGAAATGAACTCTGTGACTTCAGAAGACCACGAAAGCATCAG
CCAGGATAGCTTCCGGCCGACCTTCACGGAAGCGAATGAAAACGTCGACTACACCAAGCG
TTCCGACACAAGCCCTGAGAATGTCACCGTATCAATACCGCGCCTCATCTCTCGGCTAGA
TACCCTCCTCATCGTCCTCAAAACTTGCAAAGGCAGGCAATGTACGCATCCATGGGAGGT
CTTGCATCCGGAAGGTGATGTACAAGATCTTCACGACGCTCTCAATTCTGACTTCGACGA
GTTTTACGAGGTCCAGCAGAGAGTGTACTTTGAGAAGTGCGAGAAGGGGTATATCGCCGA
AAGTGAGGGGCCGGATGGACCGAAGATTTGGGGTGAAGGGGGTGTGGGGGTGATGTGGGA
TGAGATGGCTGTCTGATCAACTGACCGTGGAAGCTCGTGGACTTGGGAGGCGGAAGTCCG
GATGTAAAGACCGCTCCAGTGGTTGGGAAAACTTGAAACTCAATGGATCAGGTGCGAGCT
GATGATCTTCGAGCCCCTAAGATATCGTTGACTCGAATTCATCTGCCAGCAAGCC
>MATOU-v1_1472778
CGACCAATTGCTGGCCCAGGTAGGCATAAATGGGCACAAAGCAAGCAAATACATGTCCAA
GGCCGCCAAACTTGGCTCGGCCTTATTTGCCGGCAGTGATGGCAAGCAGTCTGGCGGCAT
CATAGAACCCCACGCAGATATCAACATCTTCTCAGTCGCATCGGGGCACCTCTACGAACG
AATGCTGAACATCATGATGGTCTCAGTCATGAAGCATACCCAGCACACCGTCAAGTTCTG
GTTCATCGAGCAATTCCTATCACCCTCGTAGCAATTCCTATCACCCTCGTTCAAGGATTT
CTTGCCCATTTTGGCGAAGGAGTACGGGTTCAAATACGAAATGGTCACGTACAAATGGCC
GCACTGGCTGCGAGGCCAGAAAGAAAAGCAGCGTGAAATATGGGGCTACAAGATCCTTTA
CCTGGACGTGCTTTTCCCTCTGGATCTCGACAAAGTGATCTTCGTCGACGCCGACCAGAT
CGTACGCACGGACATGTACGAGCTTGTCCAGCACGACTTGAAGGGCGCACCGTATGGCTT
CACGCCTATGTGCGATTCGCGAACGGAAATGGAAGGCTTTAGATTCTGGAAGCAGGGCTA
CTGGAAGAACTTCCTACGGGGCCTGCCCTACCACATCTCCGCACTCTATGTGGTCGATCT
GAAGCGATTCAGACAGATTGCGGCTGGCGACCGGCTAAGGCAGCAATATCACCAACTCTC
CGCCGACCCGGCGAGCTTGAGCAACCTTGACCAAGATCTGCCGAACCATATGCAGATGGC
GTTGCCGATTCATTCCTTACCACAGGATTGGCTGTGGTGCGAGACCTGGTGTTCGGATGA
GGCGCTCAAGAACGCGAAAACGATTGATCTCTGCAACAACCCGCAGACGAAGGAGCCGAA
GCTCGATCGTGCTAGGCGACAAGTCCCTGAATGGACAGTATATGACGATGAGATTGCTGC
GCTCGCAAAGAAGCATAAGGATAGCGAAGTAGCTGGGAAGCCTGTAGCTGGAGATGCGGC
AGATGCTGGTGTGCAAGGTCAGGAGGAAGAAAGCGTTCAGGAACGGCTGCAGCGGGAAGA
TGCAGAGAGGGAGCGCAAGAAGCAGGCGCATGTAAAAGATGAGCTATAAAAAGTAGACCG
TGTACGATCACCTTGACAGGACGTGGTGCGAAGACATTTGTGTTGCATGATGAGAATAAT
CATGGGTGCAAGTCAAATGCTTGACATCTGAGTCGCGCTTG
>MATOU-v1_1472892
GCTCTCGCGCTTTGCGCTGGGATCACTCGTGACGGTGTGGTGCTCTCAGCAGCAGGGCCA
AGAGGCTTTGTCGACGACTGTGCAGGTGCTGCAGCCGCTTCGTCAAGCTGCCTCCGATAG
ACAGCTTTCTCCGAGTCTTGCTTCTCGACCTTGACTTTGGGTGCGGGGCCCACAGAGGAT
GTGGCGGCCACATCTTCTGCCATCTCGGCGTCATCGAGGTCCGTTTCATGCAGCCCTTGG
CGCACCTTCGGAGGAGACGTTGCATCCGCAGCAATTGGTTTGGCGGTCGTAGCAGGGATG
TGGGCCTGAAATTGCGGTACACTAGGCATTTTTGTTCTCGTTGCCTCGTAAGGATCTAAC
AGGTGCCAGTACTCTGTCTGGTTCCACTCGCATGGCTCGTCCCATCTTCCAGGGCACATT
GCCGCGGTAAAACCCTCTGGCATAATGCCCGTGGTAGTAGAATTGTAGGCCCAAATGCAT
CCGTCGGTGAGCTTTCGGCCAATCTCAACGTCTTCTGGCCTGTCAAAGATGACGCCTCCT
AAAGCAAACATGCCGCCCGCAAAGCAAGTCAGGTGCTCGCCATTAGACTGGAACATTTTG
ATGAGCTTTCCGTCTGTGTAATTGATCGAAATTTTCAGCTCGCCAGATATGAGCACATCG
CGCTCATCTATCGTCATGGGCTTGAAAAGAAGCTCATCTTTGACCGCCTCCATGGAATCC
TCATACATAGTGCGGTACTGATCAACGAGACCACCGAGAAGAAGATATTCTTTGGGCAGG
TATTCGTATGTTGAGTCGGACTGGCCGCCGAGTGTAAATGTCTCAGCCGAGAGTCTAGTC
ACGCTGTGAAGTCCAGACGGTTCGCAAGTTTCAGCACCAATCAATGGATCTCTATTCGAT
TCAGGCGCCGCACGTAGTTCCGGCTTATGAGCTGTCGCATTTGAGCTGGAAGCAGAGATC
AGCTCATCCTTCTCTGCCTGAGACAGGCCATGGAGAGAAGGAATTTCAGCCTGTCTCCTG
CGCTTTATCGACCCAAGGTCATTTCGCAAAGGCGATCCACCCTTTTGGCCGAGATTCCCT
CCGTCGAGCTTACTGCCGGCTCCACGAATGCTTCCGGTGTCCGGTTGTCGAAGCTTCGAT
TCCAGCGACAGATCCGCCTGCGCGGCCTTTTGCTCTTGTCGAGATTGCTTCGATTCCAGC
GACAGATCCGCCTGCGCGGCCTTTTGCTCTTGTCGAGATTTGCTTGCTCTTTCTGCTGAG
TTTAAGCCATCTTCGTCTTGACGCACAGGGGGCCCAACTTGCGCGTCGCCATTGCTGTTG
GAGAAGTATTGCTGTGCACCCCTGAGGCCGGCGCCGGATCCAACGGGAGAGCCAGCCATC
TGTGCTGGCTTCGCACATCCCGAGGCATCTGCTGGCTTCGCACATCCCGAGGCATCGAGT
GAAGTCGGCCACATGCCAGGAAGGCGAGTGTTGTTTTGGAACTGCTCCATTTCGTCTGTG
ATACGGGCGATCGCGTCATAATATTTTGGCTCGCCAGTCAGCATTGCGAGCCTTGTGAAT
TCCATGGAAAGGCTACCAAGCTCAGCCATCACCACACGCGAGCCTGCTCTGTGGGGCTGA
GACGCAAACGCGGGCTTCCAACGATAATATGTCATCGGCATGCGGTTGGGTGTATCGAAT
GCAGAATACAGTATCTCGCCGAGCTCGACGGCCTTGTCTAGGAGGACACGATACTTAGAT
TGCTGGCCGCTGAGGTCGTAAGCTGCTATCAGACCACCCAAATAACGGATAGTGACCTCA
AACAGCGGAATATCCGCACGAGGAGAGGTGGTAAAGTCAATGTCAGCAACAGCCTCGACA
GCTTCGTCGAAAGCCGAAGTCAGACCCATGACCCAGAGAGTGTCAAGACTATCCACGAGG
GTGGCACCCCAGCCATTGAAAGGGTTGTTGATTCCGCCAGAGATGGGCTTCACCTCATCG
GCGCCAAAGGCCACCTCTCGATAGCCTTGCCAAGCATGCTGAGCAGCAGCCTTGACGGCC
GCTAGGCGATCCTCGTCGGCGTGACCGAAGTCATGCTCCGCTCCTGTGTACTGAACTGGC
GGAATAGATGCGGGTGTACCAGTTGGCAGCTGTAT
>MATOU-v1_1476582
CAATGCCATGTGGCTTAGGGACAGCGCAAACCAGATGCAGTCCTACCTTCCACTTCTCAC
GGCATCCCAGGCCTTCGACTCTCTTGCGTCGCTCTATAGAGGTGTCATAAACCTACAGGC
TCGGTACATTCTTACAGATCGCTACTGTAACTCCTTCCAGCCTCCTGTTGAGTCGGGGAT
CAGTCCTTCGCCGAATCCGTCAGCCAGCAGGACACTGTCCGGCCGAACTACACCAACAGC
TCAGTTTTTGAGTGCAAGTACGAGCTGGACTCACTCGCGGCATTCTTGGAAGTGTCGACC
AACTATTATAACGCCACGCAGGACGCGTCATTTTTCAAAAACTATCAATGGGTCGATGCC
GTCAAGTCTGTCCTGCAGGTGGCCGACGAGATGATGGTCCCCACTTACCAGCCGAAGACG
AGATGATGGTTCCCACTTACCAGCCGAACGGTAACGTTAGTGAATTGGCTTATAGCTTTA
CGCGCCTGACTACAAGATCGACTGAGACCACCGCGAACGATGGCCTTGGGAACCCATTCA
ATAACGGCACTGGCCTTATCCGTTCCTTTTTCCGTCCTTCCGACGACTCCACGATCTTCC
AAGGCTTTATACCTGCGAATATGATGTTTGCGAGCTATCTCAAAACCGCATCCGACATCA
TGTATGCTATTGGTGATCAGAATGATCTAGCAGGGCAAATGTGCGATCTTTCGGAAAGTC
TACGCAAAGCAATCAGCAATCACGGAATCGTACACACCTCGACTCACGGGGACATTTATG
CTTATGAGGTCGACGGCTATATGTCGCAGAACATCATGGACGATGCTAATATTCCTTCGC
TTCTCTCTGCTCCCTTCATTGGATACTTGGACCGCGATGACCAGGTCTACCAAAACACCC
GCAGCTTGATTCTGAGTGCAGACAACCCCTACTTCATGCGAGGGCCAGTTATCAATGCCA
TCGGAGGGCCCCACCAAGGACCAGGCTACGCATGGCCGATGGCTAGCATCATTCGCATCT
TCACGACCGACGACGAAGCAGAGATCACTCAGCAGCTCCAGCAGATTGTCAGCAGTACTG
ATGGCCTAGGGTTGATTCACGAGAGTATCAATACTTTTAACGTGAGCGACTGGACTCGCC
AGTGGTTCTCATGGGCGAACGGTCTCTTTGGACAGATGATCCTGGACCTTGAAGACCGGA
AGCCGGAGATTCTAGGCCAGAGCTTCCAAAACAGCACTTCATAGCATGTGTTCTTAAGTT
GCTGGCGATATTGAGGGGCCCGCGAGGTTGTCGTACAACAGCAGCATTCGTGCGGGAAGG
GTTGCGTTTCCTCGTCGAACTTATTCTCTTGCGCCGTTGCTGCAACGGCAACTTCCGGGT
CCAGGTCAGAGGAGGGCATCACAGTCTGGCCCACTTGCAGCGTACCTTAGATAACCGGCG
TGGAGCTCTCGGAGTTTCACTGCGTCTAGTGAGGGCTGGAGGGGAGATTGTGACCTCAGT
TTCGGAAATAGCGGCGATACGGCGGAGCTGTCGTCATAATCCAA
>MATOU-v1_1478043
TTACATAGGCATTTCCAGGCTCGCTGTAGCACGCTGAACGAGGCAATGTCGACAGATGAC
TATGGTCATTCCTCTACTATTATCCTCCCTCCGCTACGTCTTACTGGCCGGTACCTCTCG
ACTGTTCCATCGTCATCCTGCTTGAAAGCCTCTACTTCCCGCCTGGGCTCGGGCCATGGC
TTACAGACATCAATCTTGTCCCGTGGATACAAGAACTCCAACATGACAAAGATTAGATAG
TCCACGACCACCACAATAACGAAAAGCTTTCCAGCCCAGATTCCACAGCCGTAGTATCTC
TTTAGCCTGTCGATAAGAGCAGCACCTTGCATCTGACTGCTCGCGCCTGCTCCGTATCCC
GCCCACTCTGGCGAGTCGTAGAAGTCCGCATTGTCCTCTGCACTGGGGCTATCCGTGATA
AGATCATATACCCTCTCCGTGCGCCGAGCAATGTCATGCCAGCTGTACATGTTTCTTACT
AGGCCGTGAAACTTGTCTCGTCTCACACCACCTCCACCGCCCTCACGGCGACGGTTGGTC
AGCATCCCGATGGCGTCGCCAACGCCTCTAACCACATCTTCCACTTCCGGGAGAACAAAG
ACAGTCATGTTTCCAGGCAAAACTTCTGGAACGCCTCCAACGCGGGTGGCGACTACCATC
AGACCACAAGATGCTGCTTCCACAAGGACAGTGCCAAAGGCTTCCGTGAGTGAAGTGGAT
AGGAGGAGGTGAGCCCGGACCATTATGTTGCGGACCTCTTCATGACGAATTGATCCCAGC
AAGACGACCCTGCTCTGGCCAGATGGTGTCAGGACGAGGTTTTGAGGAAGACTGTCCAAG
GTCTGCTCAAGGTCGATAGCTTTAGGCCCTGAGCCAGCAATGATAAACCGCAGATTGGGG
TGCTGGCGAAGAAGAAGGGGAAGTGCAGAGATGAGGAGATCCGTGCCTTTGTTGTAAAAC
AATCGAGAAATGACTACAATTGTTATTGGGTCTCCTGGGTTCAAGGGTTGACTCGGGTCC
GGAGGCGGGGGCAGGAGGGCGGATTTACTACTGTGCTGCAGCTGGGAAAGCTTCGCCTCG
TGCGGTTGCAATGGCTTGAAGTTGCTCGGGACGACAGCATTAGGAATAACGCTAACAGCG
AGCGGGTTGAGAGAAGCTCGAAGAGTGGTGTTTTCTTTGCATGTATGCGAAACGCAAATT
ACATGCCCAACATCACTCAGGCTAAATTTTAAGAGCTTGTTGGCCATAATGCTTGCCGCA
TCACTAAAACCAAACAGGCTGTGGTCTGTGAAGACAGTCACTAAGCCCATAGTCCTTGCG
TGCAAGAGACCCTCATGGCAAAGATTGCTCAGACTAGCGTGACCATGCACGATCTCGATC
TGCTCGCGAATGAAGATCTGCCGCAGTGTTGGAAATGAACTGAAGACTGTGGGAAAGGTT
GTCGAGCGATAGACCACCCAATGTGGAAGATGGTAGACTTTGAGGCGGTTGGTGAGGTAT
CGAATGCCGTTTCGGCTGGGGTAGCTGTCATGCTGAGAGGGGCCATAAGAGTGAGTGATT
ATAATCACTCTGTGGCCTCTGTCAATCAATTTAGTTGACAGCTGGTAGATGTGCGATTCA
ACACCACCGGGCTGGGGATAGAAAAAGTCAGAAATCATCGCGATGTTGTAAGGCATTCTG
GCGGCAGTCGTGTCGCGCCACGTGGGCGCTCATACGGTTTTCAGTCGGGCATCATCGAGA
TGTGCGACAGTACGTGTGCCTCAAAGACTCTTTCGCGGGCCAGTGATCGTCTTAGAGTGC
ACTGAGGAATGATAAGTCTC
>MATOU-v1_1478377
CTACAGGAGTATCAGTACTACTGGCGAGTTGAGCCCAACGTCCACTTCTTCTGCGACGTC
GATTACGACGTCTTCCGCTTTATGAAGGACCACAACCAGACTTATGGGTTCACGGTGAAT
CTATACGACAGTCCGGAGTCCATCTCTAGCCTATGGCCGGAAACAGTCAAGTTCCTTGCC
TCGAACAGCCACCTGCTGCATCCCAACAATGCCATGGGCTGGCTCATCGACAAAGAGCGC
CGACCGGAACATAACTACAAGGCAAACGGCTACAGCACGTGTCACTTCTGGTCCAACTTC
GAAATCGCGGACATGGACTTCTGGCGCTCACCGGCCTACGAAGCCTACTTCGAACATCTC
GACCGGGCAGGTGGGTTCTTCTACGAGCGCTGGGGCGACGCGCCCGTCCACTCGATCGCA
CTAGGGCTGTTCGAAGACCGCGATCGGATACATTGGTTCAAGGATATCGGATATCAGCAT
ATCCCCTTCTTCAACTGTCCGAACAGCCCCAAATGCAAAGGCTGTGTCAAAGGACGGTTC
ACGGATGGTGAGGCCTGGCTGAACAAGGAGGACTGCAGGCCCAACTGGTTCAAGTACGTG
GGAAATGAGTGGGATCCGGAGGATAGCAGGTACGGCACGCTCGCTGCTATGGCGGCTGCT
GCGAACGCGACAAGTCC
>MATOU-v1_1483668
TATATACAAGGTTCGCAGCGGTCCGCTTTCTGGGTAATGTGGAGGAGGCGTGGAAAGGTC
ATCGGGGTGCAGATTGTGGCGTCAAATGGTTGCAGTGCCTTCCAGCGGTGCTAATTCCGC
AGATACTTGAATCGTAGAAGGTACGCCTCCACAAAGACCCTGCTACACTGCTACATCTTA
ATTGAGGCAACCTTCAATGCACCGAGGCTAAAGGGCATACAGCCGTCCAAGCTGCTGATT
CTGGACTGCTGCGCATACGTCTAGGTGTAGACGGTGCTCACTAGGGTATTGCACGAAGCA
TTTGAGAGTTGGCCAATCTCGCATGCCAGGACCTGCGTGTGATTCTCAGTTGTCAACCTG
AAAGGCATGAGAGCAAAATCGATGTGAATGCCACCAGCCCAACAAGCAAAGCCGAGGGCG
TGCTCAGCCCAGTGGCGGCGTCAGGCGCAGTATAGTCAAAGCCAGCATCAACACACCCAT
TCTCCCGCAGAGGATATGCTAGTGAGCTTGCATTGCTGACATCGGCTGGAATATATCCGT
CTTGCAAACCCCGGCGATAGCTCCAAGTATCAATGTCGTACTCAGTCTTCCACGTCCAGT
ACATCCACCCAATGCTGCTTTGTCCCTCGGCATTAGGCGAGTAGCCCACGATCTGACTTT
CGAAGAACAGGCGATACCAGGTCCGTTGTTCCTGATCATCATCCGAATCATGATCGCCGT
GGGGATTGGAATCGCCAGTCTGCAGGCTAAACTCACCCACAATCGTGGGTGGGATGCCAG
TTTGGGCCTGTGGTTGCTTCAGCTCCGTGGAAATATTGCAGATCGACTCCAAGATCTGGT
CGTGATCGTAGGATGCTTGCTGGGCAAACGCATAGTACTGGTGAGTATCCACTGTTAATC
TTCTGGCTGGGCTGGACGCATCGGAATCCGTGGGGTCGTAGTTCACCCAATACCCCGGAC
CCCAGAAGGCATCGTGAATTGTGACGTTCATGCTTTCGTCAGAGTTGGCTCGGCGGACGG
CACGAGAAGCGTCTGCGTAGAACGACTTGAGTTGATCCATTGGGAATTCGTCATCAGTGC
CATTTGAAGAGAGGCGGGGCTCATTGAGGAGCTCGATTCCCATGACTGTATTGCCATAGA
CATCCCGTGAGAACTCCTCCGTGAGGTTTCGAAGCACTCGAATGCTCCGATCCGCATTCG
TCTCATTGCTCGGAAATAGCACAGGCCCTATCAAACCAGAATTATCTTGGCCGTTCTGGC
TCCCTGGCGCTCCATGCAGGTCAATCAATACGCTCATGCCCAGCTCCGAGGCCCAATTCA
CTGCTCGTATGAGGTAGGGATACTGGCCACTGACGTAGGGCTCGTAGTCGTTTACGTCTA
CAGCCCAGTATCCGAAAGGTATTCTGACCGCGTTCAGCCCAGCGGCAGCCATGTCTTCAA
AGTCATTGCGTGAGAAGAATGAACTCCAATGATCGTCGAGATGGGAAGAACAGCGGTCCT
TGCCGAGCCTATTGCAAAGGCCCCATTCATCTTCGGCATCCGTGGAGCGATAAAGCGATG
GAGTTATCCATTGTTCAGTGACAAACCAGCCTCCGAGGTTGACACCGCGAATGGGTGCGG
GTATATAGGCTGTCAACACCTCGAATGGGAGTGCGAGATGGAGAAGGAGGACATTCGCGA
GATTGCGCATTAATTATCTACAAGGATGAGACGTTGTCTACCTTTATGGAAGTAGATGGG
CAGAACGCAAGCAGAGTTAGAAGCAGATGCGGTCCC
>MATOU-v1_1483669
GGAAATATGGCGTTTCTATATATCAAGATACAGCCACACTTACTCCGCAGAAGCTTGAAT
CGTAGAAGGTACGCCTCCACAAAGACCCTGCTACATCTTAATTGAGGCAACCTTCTTCGC
ACCGAGGCTAGAGGGAATACAGCCGCACAAGCTGCTGATTCTGGACTGCTGCGTATACAG
GTAGGTGTAGACGGTGTTCACTAGGGTATTGCACAAAGCATTAGAGAGTTGACCACCCCC
GCATACTAGGACGTGCGGGTGGGTCTTATTAATCAGTAATGGCAAGAGAGCAAGACCCAT
ATGGCGGCCACCAGCCCAATGAACAAAACTGAGGGCGTGCTCAGCCCGGTGGCGGCGTCA
GGCGCGGTATAATCAAAGCCAGCATCAACACACCCATTCTCCCGCAGAGGATATGCTAGT
GAGCTTGCGTTGCTGACATCGGCTGGAATATACCCGTCTTGCAACCCCCGACGATAGCTC
CAAGTATCAATGTCGTACTCAGTTTTCCACGTCCAGTATATCCACCCGATACTGCTCTGT
CCCTCGGCATTAGGCGAGTAGCCTACGATCTGGCTTTCGAAGAACAGGCGATACCAGGTC
CGTTCTTTCTGATCATCATCCGAATCATGATCGCCGTGGGGATTAGAATCGCCAGTCTGC
AGGCTAAACTCACCGACAATCGTGGGTGGGATCCCAGTTTGGGCTTGCGGTTGCTTCAGC
TCCGTGGAAATATTGCAGATCGACTCCAAGATCTGGTCGTGATCGTAGGATGCTTGCTGG
GCAAACGCATAGTACTGGTGAGTATCCACTGTTAATCTTCTGGCTGGGCTGGACGCATCG
GAATCCGTGGGGTCGTAGTTCACCCAATACCCCGGACCCCAGAAGGCATCGTGAATTGTG
ACGTTCATGCTTTCGTCAGAGTTGGCTCGGCGGACGGCACGAGAAGCGTCTGCGTAGAAC
GACTTGAGTTGATCCATTGGGAATTCGTCATCAGTGCCATTTGAAGAGAGGCGGGGCTCA
TTGAGGAGCTCGATTCCCATGACTGTATTGCCATAGACATCCCGTGAGAACTCCTCCGTG
AGGTTTCGAAGCACTCGAATGCTCCGATCCGCATTCGTCTCATTGCTCGGAAATAGCACA
GGCCCTATCAAACCAGAATTATCTTGGCCGTTCTGGCTCCCTGGCGCTCCATGCAGGTCA
ATCAATACGCTCATGCCCAGCTCCGAGGCCCAATTCACTGCTCGTATGAGGTAGGGATAC
TGGCCACTGACGTAGGGCTCGTAGTCGTTTACGTCTACAGCCCAGTATCCGAAAGGTATT
CTGACCGCGTTCAGCCCAGCGGCAGCCATGTCTTCAAAGTCATTGCGTGAGAAGAATGAA
CTCCAATGATCGTCGAGATGGGAAGAACAGCGGTCCTTGCCGAGCCTATTGCAAAGGCCC
CATTCATCTTCGGCATCCGTGGAGCGATAAAGCGATGGAGTTATCCATTGTTCAGTGACA
AACCAGCCTCCGAGGTTGACACCGCGAATGGGTGCGGGTATATAGGCTGTCAACACCTCG
AATGGGAGTGCGAGATGGAGAAGGAGGACATTCGCGAGATTGCGCATTAATTATCTACAA
GGATGAGACGTTGTCTACCTTTATGGAAGTAGATGGGCAGAACGCAAGCAGAGTTAGAAG
CAGATGCGGTCCC
>MATOU-v1_1486867
TCGTGAAGGTTCATATTTGGCATGACTATAGTGCTTACTAGCCAGGCATTGACATCTGTC
GGCGCTCAGGTATACCTACGACCACCGGCATCGTAACGGTCCAGCAAGTCTCTTACTCAG
ACCACCCAAAAGCATTCCTTGCAGTCCACCTAGACTTCAAAGCCTGCGCTGCAGACTTCG
GTCTTCGTTCCCTCGTGAAGATGCCCTTCTTGTTACCATCCACCCGCCTCACACCAATGG
ATGTCTGGAAATCAGCGAAGTTCCAGACGTGCTCGCCCGCCATGGCCTCGGTGCGGTCAA
AGACCCGATGGTACATCTCAAGGTAGGCCGTCTGGAACTCTTCGCTGAATGGCACGGGGT
CAACAGCGTGGAGGCCTGCGATCGTGTCCACGCCATACTCGGACATGATGATAGGTCTTG
GGTAAGTTTGCTCCCATCCCTTCAGAGACTCTTCCAATGCTATCTCGGCAGCGGCGAGAT
CACCGGTCTGCTCGTACCACCCGTAGTACCTATTGAGCATGGTCACGTCGAAGAAGTCTG
CAATCTTATCTGCTGTGTAATTCGCGTCTCCTTGGTTTGCGAACGTGATAGGGCGGGTGG
AGTCAAGCTCGCGGGCGAGTTCAGTCAAGGGCTCGAAATATGGTCTCGCACCGTCTTCTT
GGGCGGCTGGCTCGTTGGCAAGAGACCACATGACGATACTGGCGTGGTTCTTGTCACGTC
TGATAAGCTCACGGATGGCTTGCTTGTGTGCAGTCTGCGTCACGTTGTTGATTGCATCCG
GTCGAAAGGTTTCCGGGCCTGCAGGTCCCTGTCCGATACCCAGGTTGAGCCCCACGGCGG
TGGTCTCGTCGATCACGACCATACCCTGCCTATCCGCGAAGTCCATAACATCCTCGCTGT
AAGGATAGTGAGATGTGCGGAAGGAGTTCGCTCCGATCCAGTTGAGCAGCTGGAAGTCAT
GGACCATGTAGCTCTCATCGTGTCCCTTTCCACGTACCGGAGTATCCTCATGCTTTCCGA
AGCCAGTGAAGTAGAACGGGCGGCCATTGATGAGGAACTCGGTCCCATTCACTGAGACAG
TACGAATGCCGGTAGCTAGACTGTAAGAGTCGACTACATCATCCGATGCATCGATGACTG
TGGCTTGGAATTGGTATAGGTACGCCGCACCAGGCTGCCAAAGCTTTGCAGACTCAACAC
GCAGTTCACCGCTAGATCCTGTGCATTCCGCGACCATTTGGCCGTCCTCATCGACCAAGC
TGACATTGACTCGTGCTCCAGATCCGTTGGCCACCTCGACATCGTAATGAATAATGCCGG
TGTCACCGTCGACGTTTGTCACGAGGGTGATGTCTTCGATATGCTGCTGCGGTACCGAGT
ACATCCAGACGGACCTTGCAAGGCCAGCGTAATTGTAGAAGTCGTGAAAATAGGTCTGCT
TCCTCTCGCCCGTGTACTCGTCAACACTTATCTCTCCTGGTGGCAAGGTCTCGTACGTAA
GCTCGTTGTTGACAGCAATAGTGAGACGA
>MATOU-v1_1489108
CTCCTAAACCTCGACCTCCACGAGCCTCCGAAAAGCAGTTCATCACTGTCCAAGCCGATG
GAACAGTATCCAAGCTGCAACCGCTGCCATGTTGGTACGACAACCATGTCGCCCTTACCC
AGATGGCACGGGAGAAGCAGATCTCACCCGAGGAGGCCTACCAAATAAGTGACGCAGAGG
TTTTCATGTCCCTCGTAGTACCGGCCTACAACGAAGAAGAGCGTTTAAGCGGCATGCTGG
AAGAAGCAGTAGAATATCTGGAAGAACAATACGGTCACCACGGCACGCCCAGCAAAAGCA
GCAGTAACGGATCACTGCAGGCGAGTGGACAGCAGGGAGACAAGTGGCGAGGATGGGAAA
TCATCGTCGTCTCGGACGGGAGCAGAGACAGAACTGTCCAGACGGCACTGCAATTCGCAA
AGACTCACCAACTCAACCGATCTCCACCCGTACCGAACGGACCATGGCATGGGAAGAACA
ATGCCAAGCCTACGAACATCCCACCAGGCACGATTCGTGTTGTCCAATTGGAGCAGAATC
GCGGGAAAGGCGGCGCTGTGACACATGGTATGCGGCACGCCAGAGGGACATACGTTGTCT
TCGCCGATGCGGACGGAGCCAGCAAATTCACCGATCTGGGCAAAATCGTCCAAAGCTGCG
AGAAGGTGAAGGACGAGCAGGGTCGCGCGGTCGGCGTAGGTTCCAGAGCGCATATGGTCG
GCACCGAAGCCGTGGTAAAGCGCTCCTTCCTCCGCAATACCCTCATGCGCGCCTTCCACC
TCCTAATCTGGACCCTCACCACCCCCCGCACATCCCATATCAAGGACACCCAATGCGGCT
TCAAGCTCTTCTCCCGCCCTGCGTTACCGTATATTATCCCCTACATGCACTCGGAAGGCT
GGATCTTCGACGTCGAAATGCTGATGTTGGCCGAGAGCGCCGATATTCCGATGACGGAAG
TCGCGATTGGGTGGAAGGAAGTCAAGGGGAGTAAGCTGAATGTGATTAAGGATAGTTTGG
GTATGGCGTGGGGGCTGGCTATGCTGCGGGTGTGTTGGGGTGCGGGGATTTATAAGAGGG
ATTGATGGGGCTTCCTGTAAAAGTCTTCGGAATTTTGGCTATGTGGCCTGGCTTTGTGTT
TGGGCTGGGGTTTGCATGTAATTGCCAGATCTGCCAATGCGACTTGGGATGTTTGCATTT
GCGGCATTTAGTTCTTGTGGTGGCAAAAGTACAGCAGATCGTCGAGGTTCATCAAGCCGT
TAAGCCGCAGTCGCAAGAAGATCTGAACCGAAAGTGCGGTGGGGCCGAAATACCTCGCCA
CAGGACATCGCGAGGCCAAAGTAGAAGAAATGTAGTGCAACCGCCATCCCGAATCGCACC
GCGCGGGAATTCACAAAGTATATT
>MATOU-v1_1490268
ACATGGGTCATCTTCAACCTCGCTGTGATCGCCTTCCTGGTCCACAGCGTCTGGACCTTA
CTCTCCCTGCTCGTAGTGACCGGCAGCGAAGATGCCATCTCGAAAGCCGAACTGCCCGCG
CCAGGCTCGAAAATGATCGATACGCGACCCCAGCTTATCCCCAAGATCATTCACCAGACG
TACAAGAATGCCACGATCCCGCCGGTCTGGCAAGAGGCGCAGCAGAGCTGCAAAGCTCTA
CACAGCGAAGAAGATGGGTGGGAGTACAAGCTTTGGACGGACGAGATGAGCGCAGACTTC
ATTAAGAAAGAGTACCCATGGTTCTACGATACCTTCATCAACTATCCCTACCCAATCCAG
CGGGCAGATTCGATCCGGTACTTTGTCCTGTCGCACTTTGGCGGTATCTACATCGACCTG
GACGATGGCTGTAACCGCGCGCTGGAGCCTCTTCTCAGCTACCCAGCTTTCGTGCGGCGC
ACAGTTCCCACGGGCATCAGCAACGATGTCATGGGCAGCGTGCCGCGGCATCTCTTCTTC
ATGCGCGTTATCGAGCAGATTGCCGATTACGACCGCAACTGGATCCTCCCGTACATTACC
GTCATGGGGAGTACCGGTCCGCTCTTCCTGAGTGTTATGTGGAGGCATTGGACAAATGAC
GGGCTGAATGTGGGCGATGATGCGGAAGGTGGGAGGATACGGATTATCTTCCCGGATGAG
TACAACGGGCACACATGGAGCTTCTTCACGCACCATCTTGGGAACAGCTGGCACGGCGCA
GATGTGCAGTTGATTTTCTGGCTCGCTCGCAATTGGATCTTCGTCACTGTCCTCGGCTTC
GTCTTGGGCATCACTGTCCTCCTACTAGGCTGGTGGGTATACCGTCGCTACTTCGTGCGC
GCACAGGCTGGGGACATGTCCCCGCGATGGAAAGCAGCTGGCCCGCTTAAGCAGCGGTTG
CCATTCTGGAAAAGGTTCACTGGAGGTCGCGACCAGAATTATGAGCTCGTGGACAGACAC
GAAGTGTGATGTAGTCGCATTTAGTGCTCAGCCTATCTTCTAGGCTTGAGCATCGATATG
CATTTGGATTATGCTGCGTTCGAGCGTAGGCGCTGGGAGGGAAGCGATGCCGGTAG
>MATOU-v1_1492654
TGTCCCAAATGAGCGGACTCGAGCTGTCCAACGGCCTGCTAGGCCAGACGTTCAACGTCC
CCATCCAGGCCTCTACGCCTTCGAAAGTTGCTTCCGCCCCGTCTTCGACATAGACGCCGA
AACCCGTGCTGCACTCCATGCTGGGGTAGATTCTAGTCGCCAGAGCAAAACGCTCGTTGA
TGTAGATCTCAACTAAGGAACCATCGACGAAGACGTCCATGTTAATGGCTTCCTGCTTCG
AGGACCCGTCGTGTTGACGGATCGTGTACGGGTGGAAGTATCCAGTGACGGAGGCGTTGT
TGAAGCCGTCGATGGTGCTGCTCATCGAGCGGTCTACAATAATAGTGTTGTTGGTGGGCT
GGTAGGAAATGGTGGTGTACTCGGTCATATGGGGGGATGCGCCGATGATAAGGCCGCAAG
CGCCTGTGGCAGAGGTGATCGATGCCTTTAGCTCCATGTGCGCGCTACCTTCTTGTTGGA
TGACCTTTGAGCTGGAGACAGTGCCAACTTCGAAGTTCTTGTGAGAGGCGTCGGCAACAA
GGCCCTCTACAACGTCGGCCAGGGGCTTGATACCAAGCGTAGTGGCCTTGAACGTCCCAT
CCTGGTTGTGCTCCAGGGTAGCCTCACGAGAGTAGGCAACGCTCCCATTGACGTTCATGA
CTCCCTTGGTCTCATGCACGAACAGCTCCCGTGGCAACGCCAGAGATCCTTGGAAACCTT
GCTGCTTGGCGCTGAACAAGCCACTGTCACCGACCAGATCCTCGGGCGCCCAGGCCCACT
GCACACGTCGATTGTTCTTCGTGTCGTTGAAGCTGGTTAGAGCGTAACTAAGGCCCCAGT
CGGCGGCGCCACCTGCAACTGGGGTGAATTCTGCGCTTCCGTTCTCGCGGCGGCTGACGA
TACCCTCGTTCCCCCATGTCGTTCCACAGGGCCCAGTGGTTGCTCGGGTGGAATGTCAGG
TTGTTGCCCTCAGTACCCATGTTGATGTAATAGTGCAAGATTCCATCGCTGTCAGGCAAG
CTGAAGAACCCACTGACTTCGAAGTTGAACCCGTACGTAGCTGTAGAGAGAATTGGACCG
AGAGAAGTGTTGGCGGCAGGCTCCCACAGTGCTCCTTGGAACGTCCAGTGCTCCTTGGAA
CGTCCAATCCGTGAGATCGCTGGCTGGCGCACTCCAAAGCGGCATCCGTGGTCCAACACC
CTTAATACCCGAGCCAAAGACAGAGTAGTAGTGCGGTTCGTGCATACCCAGAATCTGATC
CATCGCCGGCCAGGGTTCGAAGAAGCGGCAGATTCGTAGTCGTGTTGATGACAGGGTTGC
CCTCGTACTCTTCCCAGGTCTTACCGCCATCGGTAGAGTATGCAAGTGATTGTGTCTCGG
TGAAGGGTTGATAGTCAATCTGCCAATTGGTTGGCAGGTGGGCAACCGAGGTGTAGAACA
GGAGCAAGGTCCCGTCTTCCTCGCCTTGCATGTTCACTGGCTGACCAGTGCCCGAGAATA
TCCCCAGGCCATTGTAGTTTCCGTAACCTGTCGGACCAAGTGCGAGAGCTTCGCTATTCT
CCCACCCGTTGTAG
>MATOU-v1_1495061
CGTCATCCTACGCGGCGCTGCCTTGGGAGGTTGGATGAATATGGAAAATTTTATCACAGG
CTACCCAGGTCATGAGTCCGAGCATCATGCGTCCATGATCAAGGTCCTGGGCAAGGAGAA
GCACGACTTCTTCTTTGATAAGTTCTACGAGTACTTCTTCACCGAGGCGGATGCCGAATT
CTTCGCCTCCAAAGGTCTCAACTGCCTCCGTCTCCCCATGAACTACCGGCATTTTGAGGA
TGACATGAGCCCACGCGTCCTCAAGAACGACGGGGCGGGCTTCAAGCACGTAGATCGCGT
TGTCAACCTGTGCGCCAAACACGGTATCTACACCATCCTGGACTTGCACGCCCTGCCCGG
TGGACAGAACCCAGACTGGCACGCCGATAACGTCACCAACTATGCTGCCTTCTGGGACCA
CAAGGACTTCCAGGACCGAGTCTGCTGGCTCTGGCAGATCATTGCCGCCCGCTACAAGGA
CAACCCCTGGGTCGCAGGCTACAACCCAATCAACGAGCCCTGCGATCCAGAACACTGGCG
TCTCCCTGCCTTCTACACCCGCATTGAGAAGGAAATCCGCTCGATCGACCCAGAGCACAT
ACTCTGGCTAGACGGCAACACCTTCGCCATGGAATGGAAACACTTCGACGAACACGTCCT
CCCCAACAGCGTCTACGCCCTGCACGACTACAGTATGATGGGATTCCCCAAGGGAGACAC
CTACACCGGCAGCGCAGAACAAAAAGCCAAACTGGAGAAACAATTCCTCCGCAAAGCCGA
ATTCATGTTCAAACACAATGTCCCGTGCTGGAACGGCGAATTCGGCCCCGTGTACGCCAA
TCCCGCCCTCGACGAAGGCAGCGCCGAAATCAACTCCGCCCGCTACGCCCTCCTGGACGA
ACAGCTCAACGTCTACGACAAATACCGCATCCACTGGTCCATCTGGCTGTACAAGGACAT
CGGCGTGCAGGGGATGGTGCACCTGGACCCTTCCAGCAAATGGCTCCAGACCATCTCCCC
CTTTCTGGAGAAGAAACGTCTCCTCCAGCTCGACGCCTGGGGTCGGTACCCGAGCCCCGC
GATCGAGAATCTGATCGCCCCGCTCGTCGACTTCATCGACGCCCATGCTCCCAAGAGTAA
GGAGCAGTACCCCACCCCCTGGGCGACGGAGCGGCAGATCACGCGGTTGGTCAATCAGTT
GTGGATGGCCAGGTGTCTGAGCGATGAGTTCGCAGAGTTGTTCCGCGGCATGGGCGAGGA
GGAGTTGGAGGAGTGTGCGAGGAGTTTCCACTTTGACAGGTGTTTGCAGCGGGATGGGTT
GAACAAGGCGTTGATGGCACATGCGGAGGCGCCGGATGCTGATGGGGAGAGGCCAGCGGG
TATTGCGGGTGATGGGGACGAGAATTTGGAACTGGATTAGACTAGTTTGGGGTTCCTTTT
GCTTGTTCTCTGAATAGATAGAAGTGAGGGCAAGGTATGGATCTCGGTGGTCATCTACCC
TAATCTCAAATACATGTTTCCC
>MATOU-v1_1503436
CCAGATACTCCAACGCTGTTTCACCAGTAATATTCAATTGACATTCTGACACTCGATACA
AAGGAAATCATTCATGGCTCTCCAGCGATAGCCTGCTGGCAAGCCCATTGACGTTTTCGA
ACGTCTCCTCTATGCAGCCATGACATCGACGCTACGACCTAACAGTGTGCCGTACCTTCC
TGGCGCGTACACAGTCGCCTTCCTCCAACGCCTCTAGCTACATCATGCACAATTCGGCCC
AGAGCGCGGCAAAGATACTCGCAAGCCATGGGACGATACTCGCAAGCCATGGGACTAAAG
TTTGGGCGGAAGCAGAAATACTGCTGTTCGCGATTGGTTGGTCAGAAGAAGTGGCGTTAC
TGGGCGACTGTGTAATCGTTGTGCTGTTGGAGTTTGCGACTAGTCCAAAAAGTTCCTCAT
CTCCCTCTACGAGCACAACCGCCATTCCACTCTGGAAACGCGTTAACGGGTGTCTGGAAT
GTCAAAGATGTTAGATTCGGCCAACACTTACCACAAGATGCCACTGAAGATGACAGTGCA
ACAGCCACGCGCCTGGGTTGTCGGTAAAATACCTGATAGCCGCCCATCCAGATGCAGGAA
GCTCAACTGTGTCCCGGTATGGGGGATTGTCCAAATTGAGCAACGACTCCGGTGCATCAT
TGACCGATGCGTATGGAAAGTCACCATCACCAGTGCCTAGCACCCAAAATTTGTGACCAT
GGAGATGCATCGGGTGCCCCATATTATCCATAGAATCGTTCGCGATCCTCATAATAATGT
CGACTGTTGAATTAAAGGGCATGTGTAGAGTTGTGTTAGCATTCCAGCCGTCAGAAACAT
TGCCATAGATGATAGGTGTCTTCGGCTCGGAATAAGGGTAACCGTTTACAACCCACACCA
CGATGTCTGTCTGGCTGATGTTGAAATGTTTCGTCTCCACTGCCCGACCGGCTGGGGGTG
GGGTGCGTTCAAAAGGTGCCAGACTTTCTGCTACAAGGCTTGATGCCGCACTTTCTGCTA
CAAGGCTTGATGCCGCACCTTTTGCAGAGCCGTTCACAAGCATGTGGACCGTGTCGGAAT
CATCGTAGATATCCAGGAGTGCATCTGTGGAGATGTTGGTCGAAGAGTTGGGTTGATCCA
GCACAACTGCGCCATCGCTTGTGTATTCGACGATGGCGACGTCCTCGATGACTTGCTGCA
TATCACCGATTGGGGTGGCAGCAAAACGAAGAAGGTATCGACTAGGGAGCTGATCCAATT
TGATCATAACTGAATACCGCTGACCAATGGCAATAGGGAGCACCTTTACTTCTTGCATCT
CTACATAGAGCCCATCGGCGGCGTAGACGAACATTGAGTGCGAATCCAATGAAACACTGA
GTTTGGTGGTGGAGCCCGCGTTCACAAGGTCAAGAGCCAACCATCCCAAGGAAGCGTTCG
CCGAAGTGATAAATAAAGCGGAAGTCGTTTTGGTGCAAGTTTCCGGACCAAGAGAGCTGG
AATTATACCCTGCCTTGAACATTGTCATGGGCACGCAGCCGCGAGGACCTAGCGAAGAAG
ACATGTTTTTCATGCTTGACATCTGTCTCTTCTGTCTTTCCATACGCTGCATGGTGTTAC
TCATCGAAGTTGATGACATTGACATGCTTGCGGAGGTACTTGAAGACAGAGGCATATCCA
TTGGCATGGTCGAAGACATCGCCATGGTGCTGCTACCCATGTCCATAGAAGAGCTGTCAT
TCGGACCGATGCAAAGCTTCGTGCCACAATCTAAAATTTGCTGTGGGAGACACTGCACTC
TACCCATACCGTTCGCTAGCAAGCTGTCAACGCAGCTCGGAAAGGCTCCAGTTTGCATGT
AATCGTGGTAGACTTCGTCGGACAGGTTGTGGTACCAATCTGT
>MATOU-v1_1521696
TAGACATTTGGGAGGTTTCCTCTCTGCCTACGACATGAGTGGCGACAGGCGATTGCTGCA
AAAGGCAAAAGAATTTGGGGACATGCTTATTCGAGCATTCGATACCCCTAATAGGCTCCC
GATCACCAGGTGGAAGCCTCAAGAATACATAAAGGGACCGCAAGTGGCCGATGAAACTGT
GCTCGTCGCTGAGATCGGCTCCCTAGAGATGGAGTTTACACGCTTGTCCATCATCACAGG
CGACCCGAAATGGTACGATGCGACGGCACGTATCATGAGACTCTTTGACACTTCACAGTA
CAGCACGCATTTGCCTGGCATGTGGCCTGTGACAGTCAATGCACAAGATGCAGAGTTCAC
AGAGGATACCTACTTCACACTCTCGGCAATGTCGGACTCGTTGTATGAGTACTTCCCTAA
AATGCACGCACTACTTGGTGGCTTGGAACCGATGTACAAGAAAATGTATGATGGAAGCAT
GAAGACAGCCATCAAGTACAATCTATGGCGACCGATGCTGCCAGACGAGGCCGATGTCCT
AGTCTCTGGGAATGTGAAAGCAATGGCACCTAGCAGCGCTCGGCTGGACCCTCAAGGCCA
GCACCTCGTATGTTTCGCCGGAGGCATGTTCGCGTTGGGTGGCAAGCTATTTGACGAGCC
TTCTCACGTCGAGATTGGCAAGAAGTTGACCGACGGTTGCATTTGGACATACAAGAATAT
GCCTCTCGGCATCATGCCTGAAGTCTTTCATATGGCCCCCTGCGAATCTCGCGTATCTTG
CCCATGGAATGAGACTAGATGGCGAGAACTCATCAGTGAGCGACACGACAACGCGGAAGA
TGTGGACAGCGTGATTGCCGAGAAGCGCTTGCAGAAGGGCTTCACAGAGATTGGAGATCG
ACGCTACATTCTACGACCGGAGGCCATCGAGTCTGTGTTCCTCCTATACCGGATGACTGG
CGAGCAGAAGTATCAAGATGCTGCGTGGGACATGTTCACAGCCATCACAAACGCCTCCGA
GACACGCTTGGCGAACGCAGCAATGAGCGACATCACGCTCACGCGGGAGCAGCTGGCGCA
GACAAGCGCTGGCAATACGCAAATGGACAGCATGGAGAGTTTCTGGATGGCTGAGACGCT
CAAGTACTTCTACCTCGTGTTCAGTGAACCCGATGTTGTGAACTTAGATGAGTGGGTGTT
TAATACGGAAGCGCATCCGTTTAGAAGGCTTTTGCCTACTTAGCACTTTGTGTTGAGAGG
CTTTCTCTTGTGCGCTCTAGATAGTAATTGCTCATGATAATGGAATATCT
>MATOU-v1_1526320
GCAAACATGTCCTCCACTCACAGTAGCCATTAGGAGCTCCTCCAAACGGCGCAGCAGGTC
CTGTCCGTCACTTGCAGTAGTATATCCCCAGTTTCCCTGCCGACTATCATCGTTCTTCAC
CGCAATATTCACACCCCCCATCTCGGAACAGAACACCGGCGCCCCCCGCATATGCCTGGA
TCCTTCATCGTCCTCCCCACCATCCCGTCCCTGGATAGCCGGCAGGAACATATTCTTCCC
TCGCGTCAACGTAGCCTGTAAATCCCCACACCGCTCCCTCATCCCGCGCGCATCCGCATA
ATCATGGAAAGTGCTGAGATCCGTACACACATGCTCCCAGCCACAATTATCATTGACCGG
CCGCGAGGGATCCAGCGTCTTGGTCTTGTACACCAGACTCCTGAGATGGTCCCGCTGGCG
TTTACTCCCGCCTAGGTCCGGGTATCCCCAGCTCTCATTGCAGGGGGTCCAGGCGACGAT
GGACGGATGGTTGAGGTCCCGCCGGATCATGGCCATCCACTCGGCCTCGAAGCGCTCGCA
TCCCGTCATGGAGAAGTTGTAGGGCGAGGCCATTTCGCCCCAGACGAGGAAGCCGAGCCG
GTCGGCCCAGTAGAGGAATTCGGGCGATTCGACTTTTTGGTGCTTGCGGCAGCCGTTGAA
GCCGACGGCTTTGCTGAGCTGGATGTCGCGTTTGCAGGCTGTCGGGTCGGGAGGCGTGAG
TAGGGTGGAGGGCCAGTAGCCTTGGTCGAGGAAGAGGGCTTGGAAGTAGGGGCGGGAGTT
GAGGCGAAGGGT
>MATOU-v1_1534512
CGACAGGCTTCCGCAGGCTCTATTGACGCCGCCTTCAAGGCCAAGGGCAAGAAGTACTGG
GGCACGATCGCCGACCCGGGCACCTTGTCCAACACCCAGAACACGAACATCATCAAAGCC
GACTTTGGTCAGCTGACGGCCGAGAACTCCTGGAAATGGGATGCCACTGAGCCAAACAGG
GGAAGCTTTTCCTTCGGCGGCGCTGACCAGCTCGCCAACTTTGCCACTTCAAACGGCAAG
CTCCTTCGTGGCCACACGACGCTTTGGCACTCGCAGCTTCCCGGATGGGTTCAGAACATC
AACGACCGTAACACGCTCACGACCGTGATCCAGAACCACATTGCCGGTGTTATGGGACAT
TTTAAGGGAAAGGTCTATGCCTGGGATGTTGTGAACGAGATCTTCGCGGAGGATGGTACC
CTGAGGAACAGCGTGTTCTCGAGGGTGCTCGGTGAGGACTTTGTCCGCATTGCCTTCGAA
GCTGCCCGCAAGGCTGACCCGAACGCTAAGCTGTACATCAATGACTACAACCTTGACGTT
GCCTCTTACGCCAAGCTCACTGGCCTTGTCAACAAGGTCAAGCAGTGGCGTGCGGCTGGC
ATCCCCATCGACGGCATCGGCTCTCAGTCACACTTGTCGGCCTCCGGCTTCGGCTCTGCG
TCCGGTGTCCAGAGCGCTCTTCAGGCCCTCGCAGCTGCTGCGCCCGAGGTTGCTATCACG
GAGTTGGACATTGCCGGTGCATCCCCAGATGCCTATGTGACCGTCGCTAATGCCTGCCTC
AATGTCCCCAAGTGTGTCGGTATTACCAGCTGGGGTGTTAGCGACAAGGACAGCTGGAGG
AGCTCGGACAACCCTCTTCTATTCGACAGGAACTACCAGGCCAAGCAGGCCTACAACGCG
GTGATGTCGGTTTTGCGTTAAGAAGTTGTCAGAGAATGAGGATATCAGGTTGGAGGTGAC
TAGGTGATGAGCAAAAGTCCTTTGCTGGATATGGGAACATCGTCCTTCCTTACGAAAGTT
TTGAGTAGCACAATCGTCTGTTGCGACCTAAAAA
>MATOU-v1_1550075
GTGCCGGCACAGCTGGCTGTGTCTTAGCGAACAGATTATCGGAAGATCCAAACGTGTCAA
TTCTAGTGTTGGAGGCAGGAGAGGATTGCAGCAACGACGAGCAGATCTACGCCCCCGGTT
CAGCGGGCAGCGCCTTGGGCAATTCGCATTTCGATTGGCAATATGCATCTCAGCCAGAAA
GCCAATTGAATAACAGGACTATAGATCATCCTCGTGGACGGCTTGTTGGTGGTACAAGCG
CCATCAACTCTTTCGCGCTCATATACCCGTCAACCGCAGAGATTGATGCTTGGGCGCAAG
TAAGCAACGAGGACTGGAACTGGCAGAATCTAGCACCGTATTTCCGGAAATTTCAGAGCA
TTGTGCCACCTTCGCAAGATGTCAAGAAAGTCCTAAACCTTGCCCATGGGGATGACGCTA
TGCGAAAATGCAAGGGTCCAATCCAAGTGTCTTTTCCAATGCGGGCAAAGCCACTTCAAC
AAGAATGGGACGAAACCTTTCGCAATCTGGGACTTTGCAACGTCAATGACCCACTAGATG
GGCAAGCAGTTGGTGGACACACATCAACTTGCCATATCACTGGCGACAAGCACGAGCGCA
GCCACGCTGGGACAGCTTACCTCGAACCAGCTCTAGCCAGAAGCAACCTCAGCCTCATTA
CGAATGTCTCTGTCAACAAGCTGATCGTAGAGCGATCTAATGCTACACCTATGGTGCAGG
GTGTGGTTTATTCGCAAAACAACGTAACTTACGAAACCCGTGCGAAGATGGAAGTCGTGC
TCGCTGCTGGCACCTTCAACACTCCAAAGCTCATGGAGTTATCGGGTCTCGGCGATCCGG
AAGTCCTAAAGAGGTACGGAATTGATGTATTGGCAGCTGTTCCAGGTGTTGGAGAGGGCC
TCCAAGACCATATTAGGTCTGCCATCTCTTTCGAATTGACGGACAACATCCCACTCTTTG
GCTCAATGCCTGTCGAAGAAGCTCGCAAACTGTACGAAACTGATCGATCAGGGCCCTGGG
CTGAGGCAGGAGCTTTTTCATTCTCATATACACCGCTCCTTCCATTCCTGGAATCACATG
AGACGCAAGAGCTCAAAGCGCTATTGGACGAGCATCTGAGGACCGATAAGCTATCCTCGG
AAACCGAGCGCAAAAGGTATGCATTTGTCCGAGGAGCGATCGAATCTCCGAAAGAAGCGA
CAGCCGTCAACTTCTTGAGTCGTAAGCCAGTCGCTGGTGCACCGGAAGCCAACTACCTGA
CGTTGAACTCCATGTTCTCCCATCCACTGTCTACCGGGTCTTCGCACATCTCATCGAGTG
ACCCAGATGCGAAGCCGGATATCAAATTCGAATATTACTCGCACCCCGTAGACCTCGAGG
TGCATGCAAGACATGTACAGGTCCTGAGGAAGATAGCTCAGACAGAGCCACTGGCATCAT
GCATCAAGTCTGGAGGGAAGCAATTTCCGTTTGTGGATAATATTGAGAGCGCAAAGGAGC
TGTGCCGCGCGCACTCAGCGACCAACTATCATCCCTGTGGCACCTGCGCGCTTGGAGAAG
TCGTCGATGGACATCTTAGGGTCAAGGGTGTACAGAAGCTCCGGATCGTCGATGCAAGCG
TAATACCAATCATCCCGCGCGGCAATATCATCGCGACTGTGTATGCCGTGGCAGAGCGAG
CTGCGGATATTATTAGCGGCGACTTGAACATCAGTAGA
>MATOU-v1_1558123
ATTGACGACTCTGGCCTGATGAATGTCACCGGCTCCAATGACTGGCTCAGATTTGGCATG
GGCGGACATAACATTGAAGCGAATGCCATTCTTTACAACACCATAAACCAGGGTCTTTCG
CTTGCGGAGGCTCTCAATGATACTTCAGTGATTGACTCTTGGACGAAAGCCGCTGCCGGT
ATCAAGTCGGCTGCAAACAGCTTGCTATGGAATGAGACAGCAGGTCTTTACCACGACAAC
GAGACCACGACCCTGATGCCGCAAGACGGCAATTGCTGGGCGGTCGTCGCCAATCTCACC
GACTCCGACGAGAAGAACATGGCAATTTCGCAAGGTCTCTCTGCACGGTGGGGACCTTAT
GGCGCTCCAGCGATCGAAGCAAAGGATGCCGTGTCGCCTTTCATTTCTGGCTTCGAACTG
GAAGCCCATCTCGAAGCTGGCAATGTCACAGCTGCCCTGGCGTTGATGCGTCTACAATGG
GGCTACATGCTTGACTACAAGTACATGACCAACTCCACATTCATCGAGGGCTACTCCTTC
GATGGGAGCTTGCACTACGCACCATATACCAATGACCCCCGTATCAGCCACGCTCACGGG
TGGGCAACCGGACCAACGAGTACATTGACGTTCTACATCGGCGGTATCCACCTCCTGTCA
GCGGCTGGAGAGACCTGGGAGATCAGCCCCAGACTCGGTGACCTCAAGGAAGTCGACACT
GGCTTCGAAACGCCACTGGGAACTTTTGCTTCGGGGAACTTTTGCTTCGCAAGTCAACGC
ATCAAGCGACGGTGCTATCACTGGTATGCGCTTCCAAACGCCTCCGGGTACCATGGGAAG
CGTGAGTGTCCCGGGCGTCAGCGGGACTTTGGTCAATGCAAATGGCACGACCGTGCAGCT
GCAGAACGGCATGGCTGAGAACGTTATGGGCGGGATTTGGATGCTGATGAGTAATGCTAC
TGGCACCGTTGGCGGTGGTGGCAATGGGACCATGGGTTCTGCTACCCCGACACCTTACAC
TGGCGGCGCTGCCAAGGATGACGCAAGCGCCCTTACCCTGGCTGTTTGTATGGGTCTGCT
TACTTACCTGCTCTAAGAAGGAAAGATGAATGATACGTATGATTCAATGAGACTATGCGT
TCATCATCGATCAAGACTAGCTACGATATAC
>MATOU-v1_1573168
ATTCACATTTTCATAGTAGCATTGGTCCCGCTAGGCACCTCATACGGCCCATACCCAGGT
CGTGGGAAGTTCGGTGTCCCGTCTTCATTCCATTCGAACTTCTGCGCACGGATGTCTCGG
GCACTCCATCCGGTGTAGGGGTTCCTCATGCCATGATAGACGATCCAACTTTCGCGACCG
TCTGGAGATGTTGTGAAACTGGCATGACCGACGCCGAATGCGTCTTCCAAGGCATTTTGA
TAGAACACGCAGCCTTCATTGCGCTTTCTCCAGTCTTGATTGTTCATCGGATCGTCACCT
ACTAGCTCCAGCTGGCCCAGACAATAGTTTCGGTTGTCACTTCTAGCCGCTGAGTAGATG
ACGAATTCCTGTCCGGTTTTCGGATTGGTCAACTGCTGAGGTCCTTCATTACTGCTCAGC
CTCTCGTTGTACGATCTGCCATACGGAGTCTTCTCCCAAGGGTTCGATGGAACGCTCAAT
AGCTGCCGTTCGGTGACATTGCTCTCGACGGTCCACGGGTCACTCATCTTTGAGATGCAA
AGATTAGCAGGCCAAGATTCATAGGCTGTGTACCAGCAACTGTAGATATGGTACAGTCCC
GTCTTGTGCCGGAAGTAGGTCCCATCGATAGCAAATTGGTCGTAGGTATCGAGTTGAGAC
TTTAGAGTGTAATTGCTTTCCCAAGGGTCCGCAGAGCTTGACTCAAGGACATACATTCTG
TGGTTGACTGCTGGACAAGCGAAGGTGCATAGCATATCCAAGATGGGTGGTGGGCTGTCG
TAGTTGGGGTCTGCGGTGAAAATGATGTACCATCGATCGGCTATGTTGTGAAGCTCCGGT
GCCCATAAGTCGGTCGAATAGTTCTGACCTGGTGGCGGATCGAAAGCCAATTTCACCTCG
GCATTGCTCCAGTCGACAAGATCCTGACTACGGAGGATAGTGATGTTGGTGGTAGTTGTG
TAGGTCATGTAGTAGTACCCATCATGGCGAGTCACCCATGGGTCGGCACCATTTGGCACG
ATGGGGTTTGTGTAAGTTGCTGCGTTAGAGGAGACAGTAGTGCTTTGCGCT
>MATOU-v1_1655125
ACACGCCCTACAATGCGCAATACCCGGATTGCTTGACGACTCCACCGGACCAAAACAATA
TCACACTCGACATGGCAGTTCTGTCGCAGCTCACTCCTGCTGTCCGACTGTACGGCACTG
ACTGCAATCAGACTGAGATGGTGCTTACCGCAATCGATCGACTTGGCTACAACGACACGC
TCAAAGTTTGGATGGGTGTCTGGCTCGGTGACAACTCTACGACCAACACCCGGCAGCTGG
AGCAGATGTATGACATCCTGGACACTTATCCGAGCTCTCACTTCGCCGGCGTCATTGTAG
GCAACGAGGTACTCTTCCGAGAAGACCTGACCGAGAATGAACTCGGCAACCAGCTTCGCA
ACGTCCGGAAGAATCTCACGGCACGCAACATCGATCTGCCCGTGGCGACATCAGACCTCG
GAGACGACTGGACCACCAGCTTAGCAGGCGACACGGACATAGTCATGGCCAACGTCCATC
CCTTCTTCGCGGGCGTGACGCCCGAGGAGGCGCCCGGATGGACGTGGACGTTCTGGCAAG
GCCACGATGTAATCCTCACGAGCGAGGCCCCCAACGGTGCCGCCTACCCTAAACACATCA
TCTCCGAGGTCGGATGGCCAAGTGCGGGCGGCAACAATTGCGGGACAGAAAAGGGCTGCC
CGAACGATACTGCGGGTGCTGTTGCGAGCGTTGAAAACATGAACACGTTCATGGAGGGAT
GGGTCTGTGAGTCCTTAACTAATGGGACTTCGTATTTTTGGTTCGAGGCCTTTAATGAGC
CGTGGAAAGTCATCTTCAACACCGAGAACGACCAGTGGGAGTCGAAATGGGGGCTGATGG
ATCCTAATCGGAACATCAAGGATGGATTGAAGATCCCGGATTGTGGTGGGAAGACTGTGG
ACAAGCCGTATTGATTATTTTCCGGTGTGCATTGATGAGTTATTGACGACTTGGGGGCAA
CTTGATGAATTAATTATGCAAGGCGTAAAAGGCTCTGTACGCAAGGGATGTATGTGGTCA
AGCGCAGCTACAGCGTATAGTGTAAATTGATGCCATGCAGGGCTTAACGACGTTAAAAAA
>MATOU-v1_4114943
CACCGACCCCCTGCAGGTCGACAACCTCAAGCGTGACATTCCCTACCTCAAGCAGCTCAT
GACCAACACCATCCGTGTGTACGCCGTCAACCCCGAGAACGACCACCAGGAGGCCATGAG
CATGCTCGCGGATGCTGGCATCTACGTCGTCGCAGATCTGTCCCAGCCTGGCAACTCCAT
TAACCGCAACAGCCCTGCTTGGAACGACCAGCTTTACGCGCGTTACACTACCGTCATCGA
CGAAATGTCCAAGTACTCAAACACCCTTGGATACTTTGCCGGTAACGAGGTTTCGAACCA
GCCAAACAACACCGATGCCAGCGCGTTCGTAAAGGCTGCTGTTCGCGACAGCAAGGCATA
CATCAAGAAGCAAGGCTACCGTGACATTGGCGTCGGTTATGCTACCAACGACGATGCGGA
TATCCGTGAGAACATGGCCAACTACTTCAACTGCGGCGACCAGGAGGACGCCATCGACTT
CTGGGGCTACAACATCTACTCGTGGTGCGGTGACTCCTCATTCACCGAGTCTGGCTACGA
TGTTCGCACCAAGGAGTTTTCCACCTACTCCGTTCCTGTCCACCTACTCCGTTCCTGTCT
TTTTCGCAGAGTACGGTTGCAACGAGGTCTCTCCTCGTGACTTCACTGACACCCCGGTCC
TCTACGGCGACAAGATGAACGACGTCTGGTCCGGCGGTATTGTCTACATGTACTTCCAGG
AGGATAATGACTACACGGTCTCGTCAGCGTTGACGGCGACAGCGTCAAGCCCAACCAGGA
CTTTTCGAACCTCGCCAGCCAGCTTTCCAAGGTCTCCGCCACTGGCACTCAGATGAGCGC
CTACAACCCGACCGCATCTCCGGCTGAGTGCCCTGAGGTCAGCACCTCTTCCTGGGCCGC
CAAGGCTACTCCTCTGCCGCCTACCCCGAATCAGGAGCTTTGTTCTTGCATGTACAACAG
CTTGAAGTGTGTCATCTCGTCCGATGTTGACCAGGACAACTACGGTGACCTCTTCGGCAC
CGTCTGCGGTCTAGGCGATGGCTCTCAATGTGACGGCATCACCGCCAACGCCACTACTGG
CAACTACGGCGCGTACAGCATGTGCAACTCCACCGAACAGATCGCTTTCGTTCTGAACCA
GTATTACCAGGCCCAGTCCGGCTCCAACCAGGCTTCCGCTTGCGACTTCGACGGCTCTGC
CACCACCAAGGCTACTCAGGCCCCTGGTGCCACTTGCTCTTCCCTTCTGCAGATGGCTGG
CTCCGCTGGCACTAACTCTGTCTCCGTCCAGCCAAGCGTCACTGGCGCGGGTGCTGCATC
CAGCGAGACCGGCGGCTCTGGCTCTGGCTCTGGCTCCGACTCCGACAGCAGCGGCTCCTC
CAGCGGCTCGTCCGGCTCTATGACCGCTGTCCCCAGCGTTGAATTTGGCATCCTCCCCGT
TGCCTTCATGGCTACTGTTGCCGCTGTCTCTGGCTTCGGCATGCTCCTGCTGTAGAAGAT
TCACCACCCACGATTCTTCAACGCGTTGGAAAGAAGACATAACGAAAGGACAAAGCGGAT
CTTGCCTTTGATAGCGTTTACGCGGACTCATCACAGTCAGTCAGTCTTGCTATTATATAA
TTTTGTCGGCATTTTCCACCACACAAGAAAAATCAAGCAAGTGTGCTATTGAAGCCATGG
GTAAGGTGCCGTGAGGTGTTTAATCGCGTTTCCCTTTAGCTGGGAGGTACCTGTGGCTAA
GTAACAT
>MATOU-v1_4260711
CTACATCCGCACTCGCTGCCCCTCGAATCACCAAGCGTTTTGATCACCCAACTGGCGGTA
TCAGATGGGGCCAGGAGAAGATCCGCGGTGTCAACCTGGGCGGTTGGTTCGTTCTCGAGC
CATGGATCACCCCCTCCATGTTCCACCCGTACTCCTACGAAGACGGCGTGGTGGACGAGT
ACACACTGTGCCAGCATCTCGGCAAGGAGCAATGCCGGAACGTCCTCGAGGCCCACTGGT
CCTCCTTCTTCAGCGAAGGCGACTTCCAGAAGATTGCCGACTCGGGCTTTAACCTTGTCC
GCATTCCTATCGGGTACTGGGCGTACGACGACTCCTACGGCCCATACACCTCGGGCGCAG
CACCTTACCTCGACAGCGCAATCTCATGGGCGAGGAACGCCTGCGCTCCAGGTTCGCAGA
ACGGTTTCGACAACTCCGGTCAGCGCACAGACTACCTGATCTGGCAGAAGGACGGCAATG
TCGAGAAGACTTTGAACACGCTTAAGCAGATCCAGGACAAGTATGGCGACTCTAGCTACG
ACGATGTCATTGCCGGTATCGAGCTGCTAAACGAGCCGCTCACCACTAACCCTGGCAACG
GTATCGATTTCGATGTCACTGCCCAGTTCGAGCGTGATGGTTATGGCAACCAGCGCACAT
CTTCCCAGTCGCGTGTGGTGGTCATCCACGACGGATTCCGCGACGCATCATCTTACAACG
GCTGGCTAACGCCATCCGACAACAACGCCCAGTGGGTCGCCCTCGACCACCACGAGTACC
AATGCTTCACCAACGAGCTCGTCGCCATGGAGCCCTGGCAGCACCGGCAATACGTCTGCA
ACAACGCAGGCGTCTACTCCGGCGCGGACAAATGGACCATCATCGGCGAATGGACAGGAA
TTACATCGACACCTGGAGCCAGACGCTGCGCGACGACGTGCGCGGGTACATCGAGGCTCA
GCTGGAGACGTTCGAGCGTCAGACTGAAGGCTGGATCTTCTGGACTTGGAAGACGGAGGG
CGCGCCCGAGTGGGACGCCCAGCGTCTTATTGACAATGGCATTTTCCCGCAGCCGTTGAC
TGATCGCAAGTTTGGCCAGATCTGCACTTAGAAGAAGAAGAAGAAACAGGGAATATGACt
ttctttttttctctttttGCTTTGGAAGAAGCTTCATAGGATCTGAATTCCAGGGGAGAT
ACGGACAACAAAGAGGGAGAATATGATACCAGCCATTTTTGACAGACACGGATTTACGAT
ATACACACATGAAATTTTCATTGAAAAAGGAAGGAGCAATGGGGCTGGCTCAGCGAGCGG
ACGGACAgaaaggaaaggaaaggaaaggaaaaggGAGATTGGGTGCGCTTCGTTGTACAC
TTTAGAGAATATATACCCCAAGTCTG
>MATOU-v1_5026982
GCCGCTGCGAGGCCACTGTCACTGATCACCCATCCTACACCACATTCGTTCAATCACCTT
CTCTCTCCTCCACAGTTTCTTCCATCACGCAGGCTCGCAAACCTGTGTTGAAGAAGGCAC
TCAACACCATCGTCACAGCATGGTACACGTTCTCTGACTGGCTAATGGAATGGACGCCAT
TCTGCCTCGTCGTTTCTTATTTCATTGTTGTTACTGCGATTTTTGTCATGTGCTCCACCA
CAGCCATCACTATCTTTTACTATTTCTACATGGTCGCGAACCTCTACATCGCAGTCGTGG
CTGTCATCGAGTCGTTCCTTGGACTGTCGCCAGTCAGGGAGGCGCGGGTCGCCGCCGACA
AGGCACAACTTGAAGGCTTTCCCACCCGCAACGAAGACGATTTGCCAACCATGAACATGG
TCATGGTGGCATATCTACCTAACGAGAAGGACATTGTTATTGGGCAGCTGATGTACGCTC
TTGAAGAGCTCGTCTACCCCAAAGAGAAGTTGAGAATCACCCTTGTCTACAACACCCCCA
AACCTATTGAGCCCATTCAAACACAACTGCATGCGTTGGCAGACGAATACGAACAACTCA
CAGTCATCAACGTTCCCAACTCGACCTCAAAGGCCGACAACCTCAACCACTTCTTCTCGA
TCAACACCGACCCTTCGGACTACACCGGCATCTTCGACACAGACCACTGCCCTCACCCAC
ACAACGTCCGATGGGCAGCCGAACGCTTCCTCAAAGAAAAGACAGACATTGTCCAGGGCC
GCTGCGTCGTATACAACACCAACGAGTCCTTCCTTGCGCAGCTGATCGCCATCGAGTTTG
ACAAGATCTACGCGATTGCTCACCCGGGCCGAAGCAGGATGTTCGAGTTCGGTCTGTTCT
GCGGCAGCAATGGCTGGTGGCGCTCAGATGTCATCTGCAACCTCAAGATGCACGGCCACA
TGTTGACCGAGGACATTGACTCCGCGCTGCGAGCATACGGCAGCGGCAAGAAGGCTGTAC
ACGACATGAACGTTATCTCGTACGAGATGGCTCCCAACACCTTTGGTGCTTTCTGGAAGC
AAAGGATGAGATGGACGCAGGGCTGGACCCAAGCATCCATCCGTCACCTCCCAATGATCT
GGAACAACCCGCCCAACGCGAAACGCAGCATCATGGAGCGCAACGGAATCTTCTCCCTCC
TCGTCATCCGCGAAATGAGCTTCTACCTCGTCTCACAACACACCTGCCTGCTCATCAGCT
TCGTCATCACAAACTTCCCCAACAACGGCTCCTCGCTCGCGCGCCTCGTCTTCTTCCAAT
ACCCGCTGGCCGAATGGTTCCTTTTCTCAACGCTCGGGGCCCTCGTCGCAACCCTGTACT
TCACCGAGCGCGTGCGCTCCGAGTTCACATCACGCCGGTCGATGGTCTGGTTCTCGGTGC
TGTACGTGCCTTATTTGATCTTGCAGAGTGTCATGGGCTTGTACGGGCACGCGAGAGAGC
TGGTCAAGTACTCCTCGTGGAACCCTACTGCCAGGACATGAGCGATTTGTTAGAGGATGA
TAtctttttcttttccttctttccttcctcttctcttctttcttttctCATTATCGCT
>MATOU-v1_5170631
TTTTCTTTCCAAATGCAAATTCTTGCGGCCAAATGGTCGCTTACCTTCTTACACTTCTTG
CTCTCAAACGCGGTTTTTCAATCCCGTGCAAATGAGCAGCGTCTACCTCTGGCCATCCGG
GCTCCTCCGACAGCCGCGCCCAAATTGGTATTCGCCCATTTTATTGCTGGATTAACGATC
GACTATACCCGAGATGACTGGAAAACTCAAATTACACTGGCAGCTTCTCATGGAATTGAT
GCCTTTGTTATGAATGTTGGAGCTCCAGACAAATGGCAAGTGGACCAGGTCGCCACTGCT
TATGATGTTGCAACACAAGTCAAGGGAACCGCTGGGCAGCCATTTCAAATGTTCCTCTCT
CTGGACATGTCTGTGATCAAAACTGCGTCTGAAGTGACGAGTTGGGTCACAAAATTTACA
CCCATGAAGGCCCAGCTGCTTGTTGGAGGCAAAGCTTTTGTTTCAACTTTCTCGGGAGAG
AACAATGCACTTGGCGCCGATAATATCTCGGCGGGCTGGAAGGCGGCCCTCAAGGACCCT
CTAGCAGCACTGAATCCACCAGTACAGGCCGCTTTTGTACCTGTGTGGAGTAGTCTCAAT
CCTAGCACAGCGGTGTCGACGAACCCCGTGGTGGATGGCATAATGACATGGAAGGCGTGG
CCTACGGGAAATGAAACAGCGAGTACGACTGTCGACTTGCAGTTTCAAGAGGACGCGAAA
AAGAATGGAAAGCTGTACATGGCCTCTGTTAGCCCGTGTTTTTACGCACACTATTCGGAT
AAAAACTTCATGTTCAAATCGGATGACAACCTTTATATCACTAGATGGAAAGAGCTTATT
GCCATGCCCATTCAACCTGACTTCATCCAAATTGTGTCATGGAACGATTACG
>MATOU-v1_5283604
CTTTTATTCAACAATGGCAAAGAAGTCGAAGACCCCGCAAGAGTTCTTTGCTGATTTCAT
GATGGGTGGTGTCTCCGCCGCGGTCGCCAAGACCGCTGCCGCCCCCATTGAGCGAATCAA
GCTCTTGGTTCAAAACCAGGGTGAGATGCTCAAGTCAGGTCGTCTCGCTACCCCTTACAA
GGGTATCGCCGACTGCGCTTCCCGAACCTACGCCGATGAGGGTATGGTCTCCTTCTGGCG
TGGAAACACCGCCAACGTCATCCGTTACTTCCCTACCCAAGCTCTCAACTTCGCCTTCAA
GGATTACTACAAGTCGCTCTTCTCCTACACCCAGGCCAAGGACGGTTACGCTCTTTGGAT
GGCCGGTAACTTGGCTTCCGGAGGAGCTGCTGGTGCCACCTCCCTCCTCTTCGTCTACTC
GCTCGATTACGCCCGTACTCGTCTCGCTGCCGACAACAAGGGTGCCGCCAAGGGTGGCAA
CGCTGGTGAACGTCAATTCAACGGTCTGTTAGATGTCTACAAGAAGACCCTCGCTTCCGA
TGGTGTTGCCGGTCTCTACCGTGGTTTCCTTCCCTCCGTTGTTGGTATCGTTGTCTACCG
TGGTCTCTACTTCGGTATGTACGATTCGCTTAAGCCCGTTGTCATGAAGGGATCCCTCGA
GGGATCTTTCCTTGCCTCCTTCCTTCTCGGTTGGGGAGTCACCACCGGTGCTGGTATCGC
TTCATACCCTCTCGACACCATCCGTCGTCGTATGATGATGACCTCGGGAGAGAAGGTCCA
CTACAACGGTATGGTCGACGCTGGACGACAAATTGTCAAGGCCGAGGGTGTCTCTGGACG
ACAAATTGTCAAGGCCGAGGGTGTCGCTTCCCTCTTCAAGGGAGCCGGAGCCAACATCCT
TCGTGGTGTTGCCGGTGCGGGTGTTCTCTCCATGTACGACAAGCTCCAAGAGCTCGTCTT
CGGAAAGGTCTACTCTGGAGGATCCGGTTAAGCGGGAGTTCAACGGATCGTCGTCGTTTA
TTTCTTCTTCTTTGCCTTGTCTACTTTTTAAAATCTGCATTTACGAACCCGTCTTTACGT
CCCCGAGACGAGTTCACCCAAAAA
>MATOU-v1_9304025
TGGTGGTGCCAGGTATATTTCAACCGGTAGAGGTTTTGCCACTTCAAGAATCCCCTTTTC
CATCTTGTACTCCCGTTTTGCTGACTCGTCAATTTATATGGGTGCTAGATTGATGTTGAT
TTTGTTGTTTGGAACCGTTGCTCATTGGCAAGCTCCATTGTTGTGGTTCTGGGCTTCGTT
GTCTTCATTGATGTTTTCGCCATTCATCTTTAACCCACATCAATTTGCTTGGGAAGACTT
TTTCATTGATTACAGAGACTTTATTAGATGGTTGTCTAGAGGTAACACCAAGTGGCACAG
AAATTCATGGATTGGTTACGTTAGGCTTTCGAGATCTCGTATTACCGGTTTCAAACGTAA
GTTGACTGGTGATATTTCTGAAAAGGCTGCTGGTGATGCATCAAGAGCTCACAGATCTAA
CATTTTGTTTGCTGATTTCCTTCCAACATTGATTTACACTGCTGGTCTTTATGTTGCTTT
CACATTTATCAACGCTCAAACCGGTGTCACTCAGTATCCATACGAAATTGATGGTAGTAC
AGACGTTCAAGAAGTCAATTCTGTTTTGAGACTTATCGTGTGTTCCTTGGCCCCTGTTGT
TATTGACTGTGGTGTTTTGTTTGGTTGTGTTGGTATGGCATGTTGTGCTGGACCAATGAT
GGGCTTGTGCTGTAAAAAGACCGGTGCCGTCATTGCCGGTATTGCTCATGGTATTGCTGT
GATTGTACATATTGT
>MATOU-v1_9588928
ACTCCACACTATTCGGAAAAGATTTTGCTTTCATTGAGGGAAATTATTAGAGAAGATGAC
CAATTTTCGAGAGTCACCTTGTTGGAATATTTGAAACAATTGCATCCAGTTGAATGGGAA
TGTTTTGTTAAGGACACTAAGATTTTGGCAGAAGAAACGGCTGCATATGAAAATGGTGAA
GATGCGGAAAAAGCATCTGAAGATGGATTGAAATCAAAGATTGATGATTTGCCATTTTAT
TGTATTGGTTTCAAATCTGCTGCACCTGAGTATACTTTGAGAACAAGAATTTGGGCTTCC
TTGAGGTCGCAAACTTTGTACAGAACAGTATCCGGTTTTATGAATTATGCTAGAGCCATC
AAGCTTTTGTACAGGGTTGAAAATCCAGAGTTGGTTCAATACTTTGGTGGTGATCCAGAA
GGATTGGAATTGGCTTTGGAGAAAATGGCCAGAAGAAAGTTTAGATTTTTGGTTTCCATG
CAAAGATTGTCCAAATTTAAGGATGACGAAATGGAGAATGCAGAATTTTTGTTGCGTGCT
TACCCAGATTTACAGATTGCTTTCTTGGATGAAGAACCGGCATTGAATGAGGACGAGGAA
CCAAGAGTTTACTCTTCTTTGATTGATGGTCATTGTGAGATGTTGGAAAATGGTAGACGT
CGTCCTAAATTCAGAGTTCAATTGTCCGGT
>MATOU-v1_9596794
TGATTGATGCCAATCAAGATAACTACTTGGAAGAATGTTTGAAGATTAGATCAGTTTTGG
CTGAGTTTGAAGAATTGAATGTTGAGCATGTTAATCCATATTCACCAGATTTGAAGTCTG
AAAATCCATTGCACGAAAAGAAAGCTCCAGTTGCTATTTTGGGTGCTAGAGAATATATCT
TTTCAGAAAACTCTGGTGTCTTGGGTGATGTCGCTGCTGGTAAGGAACAAACTTTTGGTA
CTTTGTTTGCCAGAACATTGGCTCAAATTGGAGGTAAATTGCATTATGGTCACCCGGATT
TCTTGAATGCTACATTTATGTTGACTAGAGGTGGTGTTTCTAAAGCACAAAAAGGGTTGC
ATTTGAACGAAGATATTTACGCTGGTATGAATGCCATGATGAGAGGTGGTAAGATCAAGC
ATTGTGAATACTATCAATGTGGTAAAGGTAGAGATATGGGTTTCGGATCCATTTTGAACT
TCACAACCAAGATTGGTGCCGGTATGGGTGAACAGATGTTGTCTAGAGAATATTACTACT
TGTCAACTCAATTGCCATTGGATAGGTTCTTGTCATTCTACTACGGACATCCTGGTTTCC
ATATCAATAACTTGTTTATTCAATTGTCCTTGCAAGTCTTTATGTTGGTGTTGGCAAACT
TGAACTCATTGGCACACGAGTCAATTATTTGTTCGTATGATAGAGATGTTCCAGTCACTG
ATGTCTTGTATCCATTTGGTTGTTACAACATTGCTCCTGCTGTTGACTGGATTAGACGTT
ACACCTTGTCTATCTTTATTGTGTTCTTCATTTCGTTCATTCCATTGGTTGTTCAAGAGT
TGATTGAAAGAGGTGTGTGGAAAGCTTGTCAAAGATTTGTTAGACATTTCATTTCGTTGT
CACCTATGTTTGAAGTTTTT
>MATOU-v1_11368499
CTACGCTGGCTATCCCGTGGTAACTCGCGCTCGCACTCGTCATCGTGGATTGCTTTCTGT
CGTCTATCACGAACCCGTATCACTGGTTACAAGCGCAAGGCTCTTGGTGACCCCTCCTCA
AAGATGTCCGGCGACGTTCCCCGTGCCAAGATGTCGAATGTTATCTTTGGGGAACTCATA
GCACCGCTCATTCTCGTTGCTGTGACCTTGATTCCTTACCTCTTCATCAATTCTCAGGTC
GGTGTCCTATCGGAGAACAATGGCAACGTGACGTTATATAGGAAAGCAGCCTTGATCCGT
GTTGGAGTTGTTGCTCTTGCACCAATTGCCATCAATGCAGGTGTTCTGGCTATGTTCTTC
GCCATGGCTTGTTGTATGGGGCCAGTCCTCAGCATGTGCTGCAAGAAGTTCGGTTCTGTT
CTAGCTGCTATTGCACACGCCATTGCCGTCATCATGCTCTTGGTCTTCTTTGAGGTCATG
TTCTTCCTCGAGGCATTTTCCTTCTCCAAGACTCTGCTTGGAATGATCGCTGCCGCTGCA
ATCCAGCGCTTCGTATTCAAGCTCATCGTTGCTCTGGCCCTGACGCGTGAATTCAAGTCT
GATACATCCAATATCGCTTTCTGGACTGGTAAATGGTATTCCATGGGATGGCACACAGTC
TCGCAACCAGCGCGTGAATATCTCTGCAAGATTACCGAACTCGGCTTCTTCGCTGCTGAC
TTCGTCATTGGCCACGTTCTGCTGTTCCTCATGTTGCCAGTCATAGCAATTCCTCAAGTG
GATAAAGCACCCAGTCGTCAAATCCGACCACCTATTTACTCCATGAAGCAATCCAAGCTC
CGAAAGAGACGTGTCTGGCGATTTGCTGCCCTCTACTTTGCTCTTTTCGTCCTCTTCCTC
GCACTGATCATCGGGCCAATCGTCGCTGGCAAATACACGGATAGCTTTGTTGATGGCCTG
ACTACTGACAGCAGCACTCCAAATGGCCTGGTTGCCTCGCTCTTCCAGCCAACCAATCAA
TCCAACAACGATACTGGCACTACTGTCTCTACAGTGTCTTCCAC
>MATOU-v1_12737328
GTCTCTAGCAACTCGGGCTTGCGATCCTCAAGGTCCAGGATCATCTGTCCAAATAAACCA
TTCGCCCACGAAAACCATTGCCTCGTCCAATCGCTTTCGTTGAAGGAATTAATACTCTCG
TGAATCAAACCCAAGCCATCAGTACTGCTGACAATCTGGCTCAACTCGTTGACGATCTCG
TCATCGTCGTCGGTCGTCAGAATGCGCACAATAGATGCCATTGGCCATGCCATGCCAGGT
CCCTGATGTGGTCCGCCAATGGCGTTGATAACAGGTCCCCTCATAAAGTACGGATTTGTT
GCGCTGAGAATCAAAGCACGTGTGTTGGCATACGTGTCTTCGTTGACAGGATATTTAAAG
AAAGGAGCAGAGAGCAGGCCAGGGATGTTGGCGTCATCCATGATGATGCGCCCGCCAAAG
CCGTCAATCTCGAACGGGTAGATCTTGCCGTAGGTTGGATGCTCAACCGTACCATGCGTC
TCAATGGCGTTGCGCAACGATTCTGAGAGCGCAGACATTCTCTGCGCAAGCGACTTCGAG
TTGCTGCCGTTCAGTTGTTCCATGATCTTCGCAGTCGGCGCCAAGTAAGAGCTGAACATC
ATGTTGGCTGGGATGTAGAGCTGGAAGATGGTGGAGTCGTCGCTAGGCCTGAAGCCGCTT
CGAATCAATCCTGTGCCATTGCCAACTGGATTTCCAAGTCCGTCATTTGCGAACGTCTCT
GTCGAACGCGTGGTCAATCGCGTAAATGTATATGGGCTGTCCAAGACTGCTCCATCCGGA
CCATATGTAGGAAGCATCATATCATCAGCCACGTATGTAGGAAGCATCATATCATCAGCC
ACGTCCAGAACGGCCTCGACAGCCTGGGCCCATTTGAACTTTCCAAAAAATTCGACGTCT
CCCGTGGCTTCATAGTAATCGGCAGATATTTGCAAAAACGCGGCGAGTGAATCCAGCTCA
TACTTGCACTCGAATACACTGCTGTTGGAGTACTTGGGAAAGACGGTATCCTCGCTTGCC
GACTCGTTCTCTGCTGGAGGTAACTCACTCTCAACAGGCGGTTGGAACGAGTTGCAGTAA
GGCGACGTGAGCAGGTACCGCGCTTGTAAGTTAATCACGCCGCGATACAAGCTTGCGATT
GAGTTCGGGTCGCTACTAGCGTTGAGAAGCGGTAGGTAACTCTGCATCTGGTTCGAGGAG
TCGCGCAACCACATTGCGTTGATATCTCCGGTGATGATAAATGTCAACTCTTCCTGCGCG
TTGTCGGCAGC
>MATOU-v1_12790867
TCCAGCCGTGCAATCATTTCACCTTGTACATAGCGACGTATTGACGACCATATCCAAGTC
CCATCAACCGCGACCTTCCCAAACGCCGTTGGAAGCCTCCAAATGCTATGAATGGTATAC
TGTGGGAAAATTAGGACAAGCAAAGAAGGAAAGCCTCCATAATGGCAAACCACAAAGCTT
TCTAGCACCCGTTAAAGCCCTCCTGCTGCTGGATCTTGACGCTCTTGACTTGCATAACGC
CGTTCTACTCCCAGGTAGGGTACCACTGGTCGCGCTCCCAGGTAGGGTACCACTGGTCGC
GAGCTTCCCAGAAGTCGCGAGGCGCCGTTGGCGCGGCGTCGACCCACGGCTTGCCCATGA
CGCCGTCCTCGAACCAGCCGTTGGTACCGCCGACAGCGACGTTGATGATAAGGTAGAAGT
CCTGGTCGAAGGGCGTGCTGTAATCGCCGGTCTGGCTCCATGGGTCGACCAGCCGCGTGC
CGTTGGCGTCGGACGGCGGGAAGTCGGCCTCGTCCCAGAAGGGCTTGTCGAACGTTGGCG
TCGGACGGCGGGAAGTCGGCCTTGTCCCAGAAGGGCTTGTCGAAGTTGACGTAGCTGACT
TGCAGCAGGCGCGTGTCGATGTAGGTGAAGAGGTACTTGGGCGTCCATTCGAGGCCGTAG
ATGTGGAAGCCCTTGGCGTAGGTCGTGTGCAGCGCCTGGCGCTTGACGTTGTTCTTCCAC
CATGCGTCGTTGTCGGAGTCGGGGCCCCAGTGCAGGGTCGATGAGACAATGTTGTCACCG
CCCTGCGGGTAGGTGTAGTTGTTGCCGCGAGACTCCACAAGGTCAATCTCGCCGGATGCG
GGCCATGGGCCGTATGTGTTGTTGACGGGCAACATCCAGATGGCGGGCCACAGCCAGTCA
CCCTCGGGGAGCTTAGCCTCAACCTCGACACGGCCGTACTTGATTGTTGCACCGGCCTTG
GTGCTGACACGTCCGGACTTGACGGGATTGACGACGGTGCCGTTCGTCGTGTTGGTCACG
GCAACACAGTTGGACCAGACATCGGAAGAGCAGGTGCCCTCTTTGAGCAGGTTGATGACA
TTGTTGGTTTCCATGAGGATGACATTGTTGGTTTCCATGAGCTTCTGATCTTGCAGAGTA
GGCTTAATGTGCATCATGCCGTCCTGAACGAATACGTTCTCGTCGGTGTCGGTAGTCCAC
TCAAATTGGCCGTTGCCGTATCCACCAACTTCGACCTCTTTTGTCCAGACCTGGTTGTTG
AAGCCACCGGAGAAATCCTCTTCAAGCACTGGACAGTAGTTCAAATTCGACACGCTCTGC
AGGCCATCGTAGACGAGGAATCCAGTCAGAGCCAGACCGCACAGAATACCAATAATGGGT
ATGATGGTCACCCACTTCTCCTTGGGGTCCTTCTTCTCCAGCCAGGGTCTCTCGAGCTCG
CCCTTCTTTATTCTCCGGGAG
>MATOU-v1_12860575
TGAGGCGATAGAGAGAGAGGCGATGATGAGGGTGGTTGATCGACTGACGAGTCGAACGGC
ATGAGCGCAATGTCCGTTGAGAGAGTGAGAGATGGGTATATGCGGGCGGAAGGGTGGGGG
AAACGGAGCACGAGATTGGCGATGCGAAAAGCGAGATTACTTCTTGACAATGACCTCGAA
CTTTCCAAAGTCCTCCGATGCCATGGCCCAGATCGCAGACAATCCCTCGGCAATGGAGGC
GAAAGGCTGGATGATGATGGCACAGAGGAGAATTGGAACTTTCCACCACGTTTGTCCGAA
ATCGAGCTCCTGGAAGAAGATTCCCCACAGGTAGAGAGTGAAGAAGGTGATGAAGCAGAA
GTTGGCGCAGACGGCGATCCAGATCGGGGTGCTCGAGTGCTCAATGAAGCCGAGCGGCAA
GTTGATGATGGTCGCGCCGAGCGTGAAGACACCGATCGTCCACAAGTTGATGGCGAGGTG
GGGAAGACCGTAGAGACCCTTGATGTCACGGATACCCATGAACCAACGACGTCGCTGCTT
GAGGAAATCGCGAAGAGTGGTCGGCGACTGCTCCCGGACGATACCGTGGATTCGGCCGCA
CGTAAAGCCACGGCGCCACGCGTCCTGCGAGAATTCAAAGTCCTCGGCGAGCGAACCAAA
GTCCCACGTGCACTCGTTCTCCATCTCGCCGTTCGTCATCAGGAACGATCCGTGGACACC
AAAGACGGGCCGCTGGATGATCGGGTTCTGGAGGTGGAAACGCGCCAAATCGTCGCCGAC
ACGAATGCCGTCCGCGACGGTAAAGTACCAGTTGTCCCAGTAGCCGATACCGT
>MATOU-v1_12891920
CGTGGCCGCGGAAAACGCGTCTATGTAACCGGCACATTTGCTGACGAATGGCAAAGCAAA
ATTCCTCTCCGCCAACTGCGCCCGCAAACACCATTTTTGGGCACAGTCTACCTCCCGCCA
GGCACGCATCGGCTCAAGTTTATTGTGGACGACCGCTGGCGCGTGTCTCCAGACATGGAT
ACGGCCACAGATGGCGATGGTACCCTCGTGAACTATGTCGAGATACCTAACCTCCAAGAT
CACTCCCGCACGTCCATGACACGTATGAATGCCAAGCGTGATGACACATGGAAGCGAGCG
ATGCACGAGCTCAAAACCGCTCATTTGTCGCCTCGTGGCGAGTGGGAAGAGCTGAGTGAC
GAATTGCCTGGTCTTTCTGAAACGATATGGACGAGTCATGTGCCGTCCTCCGTGGAATTG
GCCCAAGAAGCCGAAGAACACATGCTGGAGCAGGCTGACCATGTCTCGGAGAACGAATCG
TCGCTGCTTCCACGGCCACCACAACTACCCCGACAACTCGAAAAAGTTATTCTTAACGCT
GGTATATCCAGTAAACATGAACCTATTCATGCCAAGGCAGCTCTTGTGGACGATAATAGT
GTGCTGCCTGCGCCAAATCACGCTGTGCTAAATCACCTGGCTACAGGCGCTATCAAAAAT
GGTGTACTGGCTATGGGTACAGTGTCCCGCTACAAACACAAATACGTAACTACGGTACTG
TACCGTCCCGTGCATATGTAAAGCTTTCTACCCTTTG
>MATOU-v1_13288338
AACCAGTTataaaaataaaatataaatagaaagtataaagtcaaaacaaagaaaCAGTAT
GTTCCAAGATTTCTACTCACGGAAttttttccagttttttGGCTTTACCAACCCTTGAGC
ATCATAATATTCCCTACCACAAGAGTAACCTTGGAAAGTGAAATCATTACCTTGGTCACA
TTCACAGTTGTTACTGTTATAGACCTCCTTGTCCAATGGGCAGTTATCATAAGGTGGATG
ATGGTAACCAATGTCTGAAAAATAATGGATTTTATCCTTTGGCAAAAACAAAGCAGCAGC
GATAGAATGAACGGGAGCATCGCCCCATCTTTCGTAGAAAAATCCACCTTGATGATCCAA
AGTGTCAAAATACTCTCTGTAGGCTGGTGACCTCCACAAATTCAAGTTTGCAATTTCAAA
GTTTGACCAGAAATGGCACAGATTGTATGTTTTACCATTATCGTTCGTATCGTTCGAAAG
AAAACTCATCAGGTTGTTTTCATCTAAGTATTCGGGGTTCTTTTTGATGAAATCCATGGA
CGTTTGCCATAGTGTTGGGATCGTCACTTCATATTCATGAATAGAAACGGTAAAGCCGTA
AACTTTTTCGTTTTCTTGCATCCACTTAAAAACGTCGTAATTAATATCACAGTATAACTT
GATGTCTGGTTCCACACGCCAGTACCAATCGTACTCTTCTAATAATTCATGTCTCCAGAA
AAACCCAGATTGGTAACGACACATGTGTCTATAAGATTCGGAGCCACCGTATATGTATTT
GGTGGCAGCATCTGCACGAATTTCAGCAGCCTTGGTTTGATTAATCCATTCAGGATATGA
CCAATGTTCCTTGGGCAAAATACCAAACTTAACTTCGGAAGAAACAGCTTTGGTGACTGC
TTCCTTGAATTCTTCAGTAAAAGGTTCATCGTTTAGGAAAACCCAAGGATATGGGAATTT
CTTGTTAATTTTGTTTTCCACATATTTAATGGAGCTTAGCAAACCTTTCAACTCCTTGTT
TCTCACCAAAGTGACGTAACAAGCTTTTGGCTTACCAGCTTTGTTAGCAAAAGATGGAGT
CATGGTTGTTTTAGTGTCGATCGGGGCATCTGCCTTTTCAGCGGCAGCTTTCAGAGCCTT
GGATTCTTCATCCATGGCTTCGGAGTCTTCGCTTGCCTCTGAATTCAGAGCACTTTGCTC
TAATTTTTTAGCATCATTTTCCTCAGAGATGACTTGTTGTTCAGGGGATATAGATCCTG
>MATOU-v1_13307119
GTTGACCTTTACCGGCGCTATTGATCACGAAAGCAACACTGAAGAAGTTACATATTTAAC
TCAATACCAATATCCTCAACTATCCGCCATTAGAACATCTCTGGTTGACCCAGACACACC
TGATACAGCGAAGACAAGAGAAGCTATGGATGGCTCTAAGTGGGAATTAGTATTTTCTGA
TGAGTTTAATGCAGAAGGCAGAACATTTTATGATGGGGATGATCCATACTGGACAGCCCC
TGATGTTCACTATGATGCTACTAAGGATTTAGAATGGTACAGTCCAGACGCTTCCACAAC
GCTGAGAATGGATGCCTTTAAGAACCATGGCTTATATTACAGATCAGGTATGTTGCAGAG
TTGGAATAAGGTCTGTTTCACGCAGGGTGCTCTAGAAATCTCTGCAAATCTACCAAATTA
TGGCCGTGTTTCAGGTTTGTGGCCCGGTCTTTGGACTATGGGTAATTTAGGGAGGCCCGG
TTATTTGGCTAGTACCCAAGGTGTCTGGCCTTATTCTTATGAATCGTGTGATGCTGGTAT
TACACCCAACCAAAGTTCCCCGGATGGTATTTCTTACTTGCCGGGACAAAAGTTAAGTAT
TTGTACTTGTGATGGTGAAGATCATCCGAATCAAGGTGTTGGTAGAGGAGCTCCAGAAAT
TGATGTTTTGGAAGGTGAAACTGATACTAAGATTGGTGTAGGTATAGCCTCTCAATCCTT
GCAAATTGCACCTTTTGATATCTGGTACATGCCTGACTATGATTTTATCGAGGTTTACAA
TTTCACAACAACGACCATGAACACTTATGCTGGCGGTCCATTTCAACAAGCCGTATCTGC
TGTCTCAACTTTGAACGTAACTTGGTATGAATTCGGTGAGTACGGTGGCTACTTTCAAAA
ATATGCCATTGAGTATCTGAACGATGACGACAATGGTTATATCCGTTGGTTTGTTGGTGA
TACTCCAACTTATACTATTCATGCTAAAGCCTTACATCCTGATGGTAATATTGGTTGGAG
AAGAATCAGTAAAGAACCAATGTCAGTAAAGAACCAATGTCGATTATTCTAAATCTGGGT
ATTTCCAACAATTGGGCTTATATTGATTGGCAGTATATTTTCTTCCCAGTGGTTATGTCG
ATTGACTATGTTAGAATATACCAACCAAGTAATGCTATATCCGTGACATGCGATCCAAGT
GACTATCCAACATATGATTATATTCAATCGCACTTAAATGCATTCCAGAATGCAAACTTA
ACTACTTGGGAAGATGCTGGTTACACGTTCCCTAAGAATATCCTAACTGGTAAATGTACT
AGCTCGAAGTTCA
>MATOU-v1_14429024
ATTTAATCTATTCACTACAAACATGGACTCCAATTTCCTTATTGATTTTTTGATGGGTGG
TGTTTCCGCTGCAGTCTCCAAGACTGCAGCTGCCCCAATTGAGAGAGTTAAGTTGTTGAT
CCAAAACCAAGACGAAATGATCAAGCAAGGTCGTTTGGCTAAGAAATACGACGGTATTGC
CGAGTGTTTCAGAAGAACTGCTGCTGAGGAGGGTGTGTCTTCTTTCTGGAGAGGTAACAC
CGCCAATGTGGTGAGATACTTTCCAACTCAAGCTTTGAACTTTGCTTTCAAGGACAAGTT
TAAGGCTATGTTCGGATTCAAGAAGGATGAGGGATACTGGAAATGGTTTGCCGGTAACTT
GGCTTCCGGTGGTATGGCTGGTGCCACCTCTTTGGCTTTCGTGTACTCTTTGGATTACGC
CAGAACCAGATTGGCTAACGATGCCAAGTCTTCCAAGGGTGACGGTGCCAGAGAATTCAA
CGGTTTGTTGGATGTCTACAAGAAGACCTTGGCTTCCGATGGTATTGCTGGTTTGTACAG
AGGTTTCGGACCATCTGTCATCGGTATCGTTGTGTACAGAGGTTTGTACTTTGGTTTGTA
CGATTCCTTGAAGCCTGTTGTGTTGGTTGGTCCATTGGAAGGTTCTTTCTTGGCTTCCTT
CTTGTTGGGTTGGACTGTTACTACCGGTGCTTCCACTGCTTCTTACCCATTGGACACTGT
TAGAAGAAGAATGATGATGACCTCTGGTCAAGCCGTCAAGTACGATGGTGCTTTCGACTG
TTTCAGAAAGGTTGTTGCTGCTGAAGGTGTCAAGTCCTTGTTCAAGGGTTGCGGTGCTAA
CATCTTGAGAGGTGTTGCTGGTGCCGGTGTCATCTCCATGTACGACCAGTTGCAAGTCAT
CTTGTTCGGTAAGAAGTTTTAGGTGATATAGAGGCTCTAGCTGTATATATGTTTTGCTAA
CTAGTCCTTCTGTACCTTCCTGTACTTTAGTATAAG
>MATOU-v1_14429944
CTCAAGGTCAACCCACCAGGAAAACTTTGTACCTCGCTCGCCATGGCCAAGAAGTCCAAG
ACCCCGCAGGAGTTCTTCACCGACTTCATGATGGGTGGTGTCTCCGCCGCCGTCGCCAAG
ACGGCTGCTGCCCCCATCGAGCGTATCAAGCTCTTGGTCCAGAACCAGGGCGAGATGCTC
AAGTCGGGCCGTCTCGCTACCCCTTACAAGGGTATCGCCGACTGCGCTGCCCGTACCTAC
GCCGACGAGGGCCTCGTTGCCTTCTGGCGTGGAAACACGGCCAACGTCATCCGTTACTTC
CCGACGCAGGCCCTCAACTTTGCCTTCAAGGACTACTACAAGTCGCTCTTCTCGTTCGAC
CAGAAGCGTGACGGCTACGCCAAGTGGATGGCCGGTAACCTCGCGTCGGGTGGTGCTGCC
GGTGCCACCTCGCTCCTCTTCGTCTACTCGCTCGACTACGCCCGTACCCGTCTTGCCGCC
GACTCTAAGGGCGCCAACAAGGGTGGTGAGCGCCAGTTCAACGGCCTCGTTGACGTCTAC
AAGAAGACCCTCGCCTCGGACGGCATCGCCGGTCTTTACCGCGGCTTCATCCCGTCGGTC
GTCGGCATTATCGTCTACCGCGGTCTGTACTTCGGTATGTACGACTCGCTCAAGCCCGTT
GTCATGACTGGCCCGCTCCAGGGCTCGTTCCTCGCCTCGTTCCTCCTCGGCTGGGGTGTT
ACCACCGGTGCCGGTCTCGCCTCGTACCCGCTCGACACCATCCGTCGTCGCATGATGATG
ACCTCGGGCGAGAAGGTCCACTACTCGTCGATGATGGACGCCGGTCGCCAGATCATCAAG
GCCGAGGGTGTCTCGTCGCTCTTCAAGGGTGCTGGTGCAAACATCCTCCGCGGAGTTGCA
GGAGCTGGTGTCTTGTCCATGTACGACAAGCTCCAGGAGCTCGTCTTCGGCAAGGTCTAC
GCCGGCGGCTCGGGCTAAACAGCTCTCCTCTTTCTCTACCCTTTTATACTACCCCCCTTT
CGCATTTGTTTACCAAACCTCTCTCATGCTGTTATGCCCTTCCTGCCCGCCCGGTTTTCG
CTTTGTCCTTCCAGACGAAAAGAACAGAGTTCCTGCTTCACTTCGCG
>MATOU-v1_14432337
CTTTATCATTTTATCCAAAAGTTTACAAACCTATATAAAGTTTTGTATGTTGTTTTCCTT
CTTAGACATCATAGTTTGAAGCAGAAACATCACCACCTCTTCCGGTCCAGTTAACATGTA
CCCACTTGTCTTCTGGGACAAAGCTGGTTCCTTTACCCTTTTGAACTTGGAAAGTGTGAG
CACCAAAGTAATCTCTTTGAGCTTGCAACAAGTTAGCTGGTAATTGTTCTGATCTCAAAC
CATCGTAGAAAGCCAAAGCAGTGGAGAAAGCTGGTGTTGGGATACCTTGAGTAATGGCAT
GACCAAGAGCTGATCTCCAACCAGATTGGGCTTTAGTGACAGCATCCAAAAAGAATGGAT
GAAACAACAAATTGTCCAAGTCTGGGTTTTCTCTATAGGCAGCAGTGATTTCTTTCAAGA
AAACCGATCTAATGATACATCCACCTCTCCACATCAAAGCAATAACACTGTAGTTCAACT
TCCAGCTGTAGTCAACTGAAGCCTGTCTCATCAACATGAAACCTTGTGCATATGAGATGA
TCTTGGAAGCATATAAAGCTTGTTCCAAATCATCGATAAACTTCTTCTTGTCAGTGATTG
GTGATTTTTCACCAACTTCTGGTCCCTTCAAAATCTTTGAAGCCTTAACTCTTTCATTCT
TCAAAGCAGAAAGACATCTAGCGAAAACAGCTTCACCGATTAAAGTGACTGGAACACCCA
AATCAAGAGCATTGATGGCGGTCCATTTACCAGTACCTTTTTGACCAGCCGTGTCCAAGA
TCTTTTCAACAACTGGTTTTTCATCAGTTGGATCATTAAATTTCAAAATGTCTCTGGTAA
TTTCAATCAAGTATGAGTCCAAAACTCCATTGTTCCATTGAGCGAAAACATCGGCAATTT
CCTTGTCTTCAAATTTACCAACTCTCTTCATAACATCATAAGCTTCACAAATCAATTGCA
TATCACCATATTCAATACCATTGTGGACCATCTTGACGTAATGACCAGCACCGGCATCAC
CAACCCAGTCACAACATGGCTCACCATCTGATTTGGCAGCAATAGCTTGGAAAATTGGCT
TAATGTGTGGCCAAGCTTCTTCGTTACCACCTGGCATCAAAGATGGACCATGTCTAGCAC
CTTCTTCACCACCAGAAACACCACAACCAACAAATAAAATTCCCTTTTGTTTCAATTCTT
CGAATCTTCTGTTACTGTCTGGGAAATGTGAGTTACCACCATCAATGATGATATCACCTT
TGTCCAAGTATGGCAACAATTGTTCGATGAAGGCATCAACAGCTGGACCAGCCTTAACCA
ACAACATAATTCTTCTTGGTCTCTTCAAGTTGTCTACCAATTCTTGAATAGAGTGAGCAC
CAATGATGTGCTTGTTACCCTTGGCTTCGTTTTCCAAAAAGTGGTCAACTTTGGAAACAG
TTCTGTTGTAAGCAACAACAGTGTATCCGTGATCAGCAGCGTTAAGGATCAAGTTTTGAC
CCATAACGGCCAAACCGATTAAACCGAGATCACCTTGTGGTTGAGCTGGAGCTTTTGAAT
CAGAAGACATTTTGAGTAAATACTAGTAGTAGTAGTAGTCTTGAAGTAAACTTGTACCTT
ATAGATGGAATAGCAATTGAAAGAATTTGGGATTGAAA
>MATOU-v1_14433103
ATCTTTATTGCTATGTAGGTGAATAATACAGTGGGTGGTGTCTACATGTCTCGCTGTGTA
CTGCCCGTTCAAGAAGGGGCGCCGAGATGGGAAAGAAGCTCTAGAGGGGAGGGACCCAAA
AACATATCCCAATTATTTGTCTAAACCGCCTCAATGTTGTCGGTCACGGCGGTCGTCTTC
CACGCGGCAAAGATGCCCGTCATGCCGTCGTCCTCCTCGGGGTGAGAGGCGTGGCGACGG
CGGAAGTAGACGCGCTTGCAGTACTTCCAGCCCTCGACGCCGGCGGCAAAGATCAGGAAC
GCGATAAACGCCGGCGCCCACTCCCAGCCGATCGACGTGTGCCGGAAGACAACCTCGTTG
AGACCGGGGATGTAGACGAGCGGGAAGGTGATGACGAAGCCGAGGACGACACTCCAGAAG
AGGAGCGGGTTGGCCCAAACATCGTACATCCACTGCGTGTATGGTCGCTTCTCGGTTCCG
GCCCGACCCATGTGGAAGAACGGCCGGCGAAGATCCATGACCTCGAATGCGAGCCAGAGA
AGGCAGAAGATCATGGTGGCGAACGTAGCCGAGCGTGCGCGGAAGACGAGGCGCGAACCG
GGGTCGTTGTCGATGCTGTTGTTCGAGTTGGTGCCGAGATCGCCGTTACCGAAACCGTAG
ACGATGACCGCAAAGACACCGATGTCGACCGCGGCACCGATGAGGCCGTAGACGAGCAGG
TCGCAAAGGATCTCGGGGCGGAAGATTCCCATTTTCAGGTTGTGTGGTTTGTGCAGCATC
ACATCGGGGTCGGCCTTCTCGGCGCCAAGACCCATGGCCGGGAACGAACTCGTGCACATG
ATGACCCACAAAATCTCGACGGGCGTGAGCGGGAAGACCGAGAGGCCGTCCTCGTCCTTG
AAAGCGAGACCGATGAGAAGGACGAGCGCTTGCATGACGTTTCCAGCCAAGAGATGCAGA
ACGAATTTCGAGATGTTGGCAAACATCCTCCGTCCTTCCTCGACCGCGGCGAGGATCGAC
GCAAAGTTGTCGTCGGCGAGGACGAGATCCGAAGCGTCCTTGGCGACATCCGAACCGTTC
TGCCCCATAGCGACACCGATGTCGGCGCGCTTGAGCGAGGGAGAGTCGTTGACGCCGTCA
CCGGTCATGGCGACAAAGGCCTTGCGACGGTGAAGCGCTTCGACCATGCGGACCTTGGTG
TGCGGTGCGCAGCGAGCGATGACGAGCGGAAGGAGCGGCAACTTGTCGACCTGGTCATCC
GAGAGCTTGTCGAACTGAGCGGCAGTCATGACCATGGCATCGGTCGACTCCTTGGACAGC
ATGTGCATGTTGCGAGGCAAGATGCCAACCTGGATAGCGATGGCGCGAGCGGTAGCGGCG
TGGTCGCCCGTGAGCATGTGGACCTGGATGCCGGCTTGGTGGCATTCCTTGACCGATGCC
TTGGTCTCGGGACGAGGCGGGTCGTAGAGACCTTGCAGGCCGTACAGGACCAGGTCCTTC
TCGACGAGACCTCGGTCGGCCTGCTCGCCGGAAGACGACGAGGCGCCGTCCCAAGGCTTC
GATGCGAAGCCGAGAACTCGGAGACCTTCCTCCGCAAGAGCTTCGACGTTGGCGAGGATC
TCCTCCTGCATCTTGTCGTCGAGCGGCGCGGGACCGTCGGCGAGCTGAACGTGGGAGCAA
GCATCAAAGATGCGCTCGACGGCACCCTTCATGAAGACGTATTGTTTGCCATTGCGCTCG
TAGAGAACACTCATCCGCTTCAAGTCACTGTCGAAGGGATACTCGGCAACTTGAGTCCAC
TCGGGCGAGTCGCCCTCCGTCCACCGCTCGCGGCCCCAGTCGAAACGGTGAGCGAAAGTC
TGGATGGCGCACTCGGTCGGGTCGCCGCGGGCGGACCACCCTTCGCCTTCCTTGAAGAAG
ACCTTTGCGACGTTGCAGAGACTCGCAATGTTGAGCAGCGTGGACATGTCGTCTCCGGCA
CGCTTGAGCAGCTCGTCAGGAGGCAAGACCTCGGCCGCGGCGTCTTTGGCCGATTCGCCT
TCATGGTCGTCGTTCTCCGACCCCTCGGCGGCCTGACGAGCATCAGCGCGGTCCGTCTTC
TCCGCAGCCGCGGTCGGCGAGAGCGGCGAAAAGCGCAGCTGAGCAGAGGTCGGGTTGAAG
GGCTCGTTCGATTCGCCGACGTAAACGGTACCGCGCGAGGGCAGCCAGGCCGCTCGCACA
ACCATTTTTCCTTGGGTCAGAGTACCAGTCTTGTCCGAGCAAATGTCGGTGACAGCACCG
AGAGCCTCCAGCGAGTCGAGCTTGCGAACGATTACGTTACGCGTCGCCATCGCTTTCGTA
CCGCCAGCGAGAGTGATGGTAAGGACGACAACGAGGGAGGCCGGAATCATCGAGAGGGCA
GTCGCGATGGCGTACAGGATGACTTCGTTCGGCGTACGGAAGTCGTTCGCAGCGAAAACG
AAGAGAGCGAACAGGCAACCGATCAAGAAGAGACCGATGGCGAGCCACGACAGAGTGCGC
TGGAGCGGAGTGCCGACCGTGACGCCGAGGAACTGTCCGATAATGTCGAGAGTCGTCAAG
CCCCAGGCAGCCGGGTACCGGTGCCACGGCGCATGGCCGTCGTCGTTGCGTCGGACCTTG
CGGACCTTCGAGTCTCCACCTCGGAGAGACTCTGCGATCGCTCCGATAGCGGTGTGCATG
CCGGTCGCAACAACGATACCACGGGCACGGCCCTTCGTAACAGTCGAGGACGAGTATGCC
ATCGTGATGCGGTCGCCAACGCCGACATCGCGCGCGTCAAATCCGCCGCCCTTCTCCTCT
TCAGCCCAGCTCGCGCCCGCATCTTTGGCGACGGGGAGGGACTCTCCAGTCAGGAGAGCC
TCGTCGGTCTCAAAGTTGACCGTCTCGATCAGGCGCATGTCGGCCGGGATCGTGTCGCCC
GTCTTGACCTCGACGATGTCGCCGGCGACCACCTGAGGCGACGGGATAGTGAGAACCTTC
GAGTTGCGGACTACGTGAGCGTTGGGCGAAGCGAGCGAGCGAAGCGAATCCATCGTCTTT
GCAGATCCGTACTCCTGAATGAAGCCGACGACGACGTTGATAAGAATTACAGCAGCGATA
ACGCCGCCTTCGATCCACGACTCGATACCGAACGATACGGCGAAGCAGGCCACGAGGACG
AGAACCATGGCATTGCAGATCTGCCCAACCAGGATGCTCCACCACTTTACGCCACCGCCG
CCAGAGAGTTCGTTCGGTCCGTCGCGCTGCAGGCGGGAAGCAGCTTCGCCGTCCGAGAGT
CCATCTTCGAGGCTAGTCGAAAACCGGTTTGCCGTTTCGGCAGGAGAGAGGAGAAACCAG
TGCGTCTCGACTGCAGTCTCTCCGGTCGATGTCTGTGCAAGACCCTTTTCGTTCGCAGGC
ATCAAATCGTCGTGAGTGCAGCAGCAGCAACAGCGAGGCTGTGTTTGGGAAGAGGACAAG
CCGC
>MATOU-v1_14433104
CTTGAGGATAGTGATATTGCTATGTATAGGATTTATACACTGGGTGTCTACATGCCTCGC
GCTGTGTACTACCCGCTGAAGGGGCGCCGAGATGGAAAAGAAGCTCTAGAAAGGACCACA
TTCCCCGTCTAAACCGCCTGGACGTTGTCGGTCACCGCGGTCGTCTTCCACGCGGCAAAG
ATGCCCGTCATGCCGTCGTCCTCCTCGGGGTGAGCGGCGTGGCGGCGGCGGAAGTAGACG
CGCTTGCAGTACTTCCAGCCCTCGACGCCCGCGGCAAAGATCAGGAACGCGATAAAGGCC
GGCGCCCACTCCCAGCCAATCGACGTGTGCCGGAAGACGACCTCGTTGAGACCGGGGATG
TAGACGAGCGGGAAGGTGATGACGAAGCCGAGGACGACACTCCAGAAGAGGAGCGGGTTG
GCCCAAACATCGTACATCCACTGCGTGTATGGTCGCTTCTCGGTTCCGGCCCGACCCATG
TGGAAGAACGGCCGGCGAAGATCCATGACCTCGAATGCGAGCCAGAGAAGGCAGAAGATC
ATGGTGGCGAACGTAGCCGAGCGTGCGCGGAAGACGAGGCGCGAACCGGGGTCGTTGTCG
ATGCTGTTGTTCGAGTTGGTGCCGAGATCGCCGTTACCGAAACCGTAGACGATGACCGCA
AAGACACCGATGTCGACCGCGGCACCGATGAGGCCGTAGACGAGCAGGTCGCAAAGGATC
TCGGGGCGGAAGATTCCCATTTTCAGGTTGTGTGGTTTGTGCAGCATCACATCGGGGTCG
GCCTTCTCGGCGCCAAGACCCATGGCCGGGAACGAACTCGTGCACATGATGACCCACAAA
ATCTCGACGGGCGTGAGCGGGAAGACCGAGAGGCCGTCCTCGTCCTTGAAAGCGAGACCG
ATGAGAAGGACGAGCGCTTGCATGACGTTTCCAGCCAAGAGATGCAGAACGAATTTCGAG
ATGTTGGCAAACATCCTCCGTCCTTCCTCGACCGCGGCGAGGATCGACGCAAAGTTGTCG
TCGGCGAGGACGAGATCCGAAGCGTCCTTGGCGACATCCGAACCGTTCTGCCCCATAGCG
ACACCGATGTCGGCGCGCTTGAGCGAGGGAGAGTCGTTGACGCCGTCACCGGTCATGGCG
ACAAAGGCCTTGCGACGGTGAAGCGCTTCGACCATGCGGACCTTGGTGTGCGGTGCGCAG
CGAGCGATGACGAGCGGAAGGAGCGGCAACTTGTCGACCTGGTCATCCGAGAGCTTGTCG
AACTGAGCGGCAGTCATGACCATGGCATCGGTCGACTCCTTGGACAGCATGTGCATGTTG
CGAGGCAAGATGCCAACCTGGATAGCGATGGCGCGAGCGGTAGCGGCGTGGTCGCCCGTG
AGCATGTGGACCTGGATGCCGGCTTGGTGGCATTCCTTGACCGATGCCTTGGTCTCGGGA
CGAGGCGGGTCGTAGAGACCTTGCAGGCCGTACAGGACCAGGTCCTTCTCGACGAGACCT
CGGTCGGCCTGCTCGCCGGAAGACGACGAGGCGCCGTCCCAAGGCTTCGATGCGAAGCCG
AGAACTCGGAGACCTTCCTCCGCAAGAGCTTCGACGTTGGCGAGGATCTCCTCCTGCATC
TTGTCGTCGAGCGGCGCGGGACCGTCGGCGAGCTGAACGTGGGAGCAAGCATCAAAGATG
CGCTCGACGGCACCCTTCATGAAGACGTATTGTTTGCCATTGCGCTCGTAGAGAACACTC
ATCCGCTTCAAGTCACTGTCGAAGGGATACTCGGCAACTTGAGTCCACTCGGGCGAGTCG
CCCTCCGTCCACCGCTCGCGGCCCCAGTCGAAACGGTGAGCGAAAGTCTGGATGGCGCAC
TCGGTCGGGTCGCCACGGGCGGACCACCCTTCGCCTTCCTTGTAGAAAACCTTTGCGACG
TTGCAGAGACTCGCAATGTTGAGCAGCGTAGACATGTCGTCTCCGCCACGCTTGAGGAGC
TCGTCAGGCGGCAGGACCTCGGCCCCTGCGTCTGTGGCCGATTCGCCTTCATGATCGTCA
CCCCCGGCCTTCTTGGAGACTTTGCGAGCGTCGTCACGGTCTGTCTTCTCCGCAGTCGCT
GCAGGCGAGAGGGAGGAGAAGCGCAGTTGGGCAGACGTCGGGTTGAAGGGCTCGTTCGAC
TCGCCGACGTAGACGGCACCGCGCGAGGGCAGCCAGGCCGCTCGCACAACCATTTTTCCT
TGGGTAAGAGTACCGGTCTTGTCCGAGCAAATGTCGGTGACAGCACCGAGAGCTTCCAGC
GAGTCGAGCTTGCGAACGATTACGTTGCGCGCCGCCATCGCTTTCGTACCGCCAGCAAGA
GTGATGGTAAGGACGACGACGAGGGAGGCCGGAATCATGGAGAGCGCGGTCGCGATGGCG
TACAGAATGACTTCGTTCGGCGTACGGAAGTCGTTCGCAGCAAAGACGAAGAGAGCGAAC
AGGCAACCGATCAAGAACAGACCGATAGCGAGCCACGAAAGCGTGCGCTGGAGCGGAGTG
CCGACCGTGACGCCGAGGAATTGTCCGATGATGTCGAGAGTCGTCAAGCCCCAGGCAGCC
GGGTACCGGTGCCACGGTGCATGACCGTCGTCGTTGCGGCGGACCTTGCGAACTCTGGAG
TCTCCGCCTCGGAGAGACTCGGCGATCGCTCCGATAGCGGTCTGCATGCCGGTCGCCACG
ACGAGGCCGCGAGCGCGGCCCTTGGTGACTGTTGAGGACGAGTATGCCATCGTGATGCGG
TCGCCAACGCCGACATCGCGAGCGTCGAATCCGCCGTTCTTCTCTTCTTCGGCCCAGCTC
GCGCCGGCATCCTTGGCGACGGGGAGAGACTCTCCAGTCAGGAGGGCCTCGTCCGTCTCA
AAGTTGACCGTCTCGATCAGGCGCATGTCGGCCGGGATCGTGTCGCCCGTCTTGACTTCG
ACGATATCGCCGACAACCACCTGGGGCGACGGGATCGTGTGGACCTTTGAGTTGCGGACT
ACGTGAGCGTTGGGCGAAGCGAGTGAGCGAAGCGAATCCATCGTCTTCGCAGATCCGTAC
TCCTGAATGAAGCCGACGACGACGTTGATGAGAATGACGGCAGCGATAACGCCGCCTTCG
ATCCATGACTCGATACCGAACGAGACGGCGAAGCAGGCCACGAGGACGAGAACCATAGCA
TTGCAGATCTGCCCGACCAGGATGCTCCACCACTTTACGCCACCGCCGCCGGTGAGTTCG
TTGGGTCCATTGCGTTGCAGGCGGGAAGCAGCCTCGCCGTCCGAGAGTCCATCTTCGAGA
CTAGTCGATAACCGGTTTGCCGTTTCGGAAGGAGAGAGGAGAAACCAGTGGGTCTCGACT
GCAGTCTCTCCGGTTGATGTCTGTGCAAGACCCTTCTCGTTCGCAGGCATCAAATCGTCG
TGAATGCAGCAGCAGCG
>MATOU-v1_14436046
ATCAATAGCATCTATTATTACACAACGTAATCGGTCTTGTCCATGGTGTTCGATCTGGAG
AAAGAAGCATACTTCTGGAATGGGTCGTTTCTTTCCAAGTCATGTTCAGGGTTCTTGGCC
TTCTTGGCCTTCTTGCGCTTGTAGATCCGTTTAATCCACTTCCAACCTTCAGCTCCCAAG
AGGAACAAAACGGAACAACCTATGGCCACACCCCATTCGTATCCAATGGGACCATGCAAG
AACACCTTGTCGTTAATGACAGGAATGTAGACAACTGGGAACACCGACACAAAACCTCCA
ATGATAGACCAGAATAAAAACTGGTTATCCCACAAGTCAATAGCCGTTTGTTTCCACCAT
GGGTTGTCGGTATCTTGTCTCATGTAAAAGAGCGAGTTGACTGGATGGATACATTCCCAA
GCCAAAATCAAAGCACACCAAGTCATGTTAGCAAACGAAGCAGATCTTCCCTTAAAGACC
AACTCACAGACATGCTTGTCGGCACTGGTGGAATTACAATTCTCTCCCAAGTATCCATCA
CCCTTGCCAAACACGATAACAACGAAACAAAGAAGACAGCAACACGACATCCAGAATCCA
TAGGCCACCATATCGCCAATCACCTCGTATGTGAAAATTGTGTTGTTTGGAGGCTGGTCA
AGAATATCTTCCGATGCCTTTTCTTGACCCAAACCCATGGCTGGGAAACAAGAAGTGACC
ACCAAAATCCACAACACTTCGACGGGAGACAACGGAAAGACGGAATATCCAGATTTGTCC
ATAAAGGCCAAACCGATCATCAAATAAAACGCTTGTGCAACGTTTTCCGCCAACAATTGC
AAAACAAATTTCTGAATGTTTGCAGACATTCTTCTGCCCTCCTCAATAGCATTCAAGATG
GAAGCAAAATTGTCATCGGTCAAAACAATATCAGAAGCATCCTTAGCGACATCTGATCCG
TTAAGTCCCATGGCGATTCCAACATCAGCCTTTTTTAATGACGGAGAATCATTGACACCG
TCACCTGTCATTGCAACAAACTTTTCTCTTCTGTGAAGAGCTTCTATCATTCTAACCTTG
GTTTGAGGAGCACAACGAGCAATAACCAATGGAAGAACTGGCAAGTTGTCGATATCCGCA
TCACTAAGAGCATCGAATTCACTTGCAGTCATACACATGGCTTTAACCACTTCTTCACTG
TAGTGGTACAAGTTACGTGGAATAATACCAACTTCTTGTGCAATGGCCTTGGCAGTTCCT
GGATGATCACCTGTCAACATATGAACATTGACACCTGCCTTATGACACAATTTGACCGAG
TGGGCAGTTTCGGTACGTGGAGGATCATAAATTCCAATCAAACCTTGGAACGTCAAATTC
TTTTCAACATTTTCTCTTTCAGAAAGATCAACGTTTTCTCCAGTGATATCATTGACTGCA
AATGCCAATACTCGCAATCCTTGAGAAGACAAAGCATTCATGTTTTCCTCAATAAACTCA
ATATCGGATTTTGTCAACTCAACAGGTTTTTGGTTATCAAAATCGTTCTTGTCAGATTCA
TCACTATGGCCCAACCAGTGGGTACAACAAGCCAACACTCTTTCTACAGCACCTTTGGTG
TAAACTCTGGTGGTCTGAGTGTCGTTTTGTTTGTAAACCGCCGACATTCTTTTGATAGAA
GAATCGAAAGGAAATTCGGCAAGGTGCTCGTAGTTTTCAGCGAGTTGTTCTCTGCCAAAG
TTGGCTCTAGAAGCGTAAACTTGAATGGCGATTTCTGTGGCATCTCCATGAGCTTTCCAC
ACAAGTTCTCCACTTTCTTCATCTTTGGATTGATTCACGGTAGCAATGTTGGCCAAGGAA
GCAGTGTAGAGCCAATTGCGGTAATTCCTGGGCATTTCAGGTACGTTTGGAGTGAAGTCA
ATTTCTTCATCGGTCTCTTTAACGTAGTAAGGACTGCGATCAGCAAAGGTGATGTCTCCA
ACGGTGGGATTGAAGGCTTCATTCGAGTTTTCAACAGAGTAAGTTCCAATGTTTGGAATC
CATACCTTCTTGGCAATCATCTTTCCCTGAGTCAAAGTACCAGTTTTGTCAGAACAAATA
TCATTGACACCTCCAAGGGCTTCCAACGAGTCGAGCTTTCTGACAATGACATTTTTCATC
ACCATCACCTGAGCTCCAACAGCCATGGTAATGGTCAAGACCACAATCAATGCAGAAGGA
ATCATAGATAATGCCACACAAATAGCATAAATCGCAACTTCTTTGTTGACGTGCATCTTC
TGGGATCCCATCACCACAATAGCAAACACAACAGCCACCCAGAATAAAAAGATAGCGAGC
CACGAAAGCTTCCGCTGAAGAGGTGTACCAGTATTGGTACCCAAAATGTTGCACACAACG
TCCTTGATGGTACCAAAAAATGCATGGGCATATTCACGCTTCTTGGGAGAATGGTCTTCA
CTCTTTTCAACTTTTCTTATGAGAGAATTGTTGCCTCTCAAAGACAGAGCGATCTTTCCG
ATTTCGGTATCGAGGCCTGTGCCAATGGCGACACCTGTTCCTCTACCTTTGGAAACAACA
GACGAACTGTATGCCAAATTGAGACGGTCACCAACGGGAATCGGAACGGTAGGATCAGCA
TATACTTCATTTTCGTCCTTTTGGACAGGCAAAGATTCACCAGTGAGAAGAGCCTCGTCG
GCTTCAAGATTCATGCTTTCTATGAGTCTAAGGTCAGCAGGAACGGTGTCACCTACCTTA
ATGTGGACAATATCACCAGGAACCACTTCCTGAGCAGGAATGGTCTGATCGTCGCCATCT
CTGGTGACTCTTGCGGTGGGAGAACTCAAGGATCTCAAAGAGCCCATCGTTTTCTCAGCT
TTGACTTCCTGGACAAAACCAACTCCAATATTGATAAGGACGACGAATCCAATGACTCCA
CCAGAAATCCAATCTTGGATTGCAAGTGCTATAATCATGGAAATGATCAACACCAAGATC
ATAGCGTTGAACACCTGATGAGCCACGATCTTGGAGTACGAGATCTTGGCATCGTCACCA
AGCGAGTTCGGACCGACAGAGTCAATAATCTCCTTTGCTCTAGCCAGCGAAAGACCATCA
CGCAGGGTCTTATATTTGTCAAGCACCTGAGCAATGGTCAAACGATATGCAAGAGAGCCA
TCATTGGGGCCAGACGAGGTGTCCTCCGTGTTGATTCTGCGGGTGCTTCTTTTTTCTGAA
ATTTTGGACGTTTTGGAAGAATTGGAAGAAGAATCCATAATGCTAGATATGTGTGATTGA
TAGCAAGGTTAGGAACGTAGCAAGGTTAGGAACTTCGCAGCGTTAAACGAGTGTAACAGT
GATATGTTCTGTTATCGGAATAGTTTGAGCTAGCAGAGATTCCTATTAAATGAGAAGGTA
CTCTCCGATAACTACAGCAACTATAATGAATAATTAATCAGGAGCTGCAGAGCTTGAATA
TCACGCTTTAGTATAGATCTAATGTGGATCTTACTTGGGCAAAATAATATAAAAGTATCG
ATATTGGTCTTGTAACTTTGAA
>MATOU-v1_14441706
CTTCGAGACGGAGTTCTTCCCAAGAAACTCTGAAGCTGAGAGACGTATCTCTTTCTTTGC
TCAATCCTTGGCTACACCAATCTTGGAACCATTGCCAGTTGACAACATGCCTACCTTTAC
TGTGTTTACTCCTCACTACTCTGAAAGAATTTTATTGTCTTTAAGAGAGATTATTAGAGA
GGATGACCAATTCTCCCGTGTTACCTTGTTAGAATATTTGAAACAATTGCACCCAGTTGA
ATGGGACTGTTTTGTCAAGGACACCAAAATTTTGGCGGAAGAAACTGCTGCTTTCGAAGG
TGAAGGTGTCGACAAAGAGTCTGAAGATGGCCTCAAATCTAAGATTGATGATTTGCCATT
CTACTGTATTGGTTTCAAGTCTGCTGCTCCTGAGTATACATTGAGAACCCGTATTTGGGC
TTCCTTGAGATCCCAAACCTTGTACCGTACCGTTTCCGGTTTCATGAACTATGCCAGAGC
CATCAAATTGTTGTACCGTGTTGAGAATCCAGAATTGGTTCAATATTTCGGTGGAGACCC
AGAGGGCCTTGAACTCGCATTGGAGAGAATGGCAAGAAGAAAATTCAAGTTTGTTGTTTC
AATGCAAAGATTGGCCAAGTTTGAAGACTGGGAGATGGAGAATGCTGAATTTTTGTTACG
TGCTTACCCTGACTTGCAAATCGCTTACTTAGACGAAGAGCCTGCCTTATCCGAAGAGGA
AGATCCAAGAATCTATTCCGCTTTGATTGATGGTCACTGTGAAATTTTGGAGAATGGTAG
ACGTCGTCCTAAGTTTAGAGTGCAATTGTCTGGTAACCCAATTTTGGGTGATGGTAAGTC
TGATAACCAAAATCATGCTTTGATTTTCCACCGTGGTGAGTACATTCAATTGATTGATGC
CAATCAAGACAACTACTTGGAAGAATGTTTGAAGATCAGATCTGTGTTGGCCGAATTCGA
AGAATTGAACGTTGAACAAATTAACCCATATGCTCCCAACTTGAAGACTGATGTCAAAAC
TGGAAACAATGCCCCTGTTGCTATCTTGGGTGCTCGTGAATACATTTTCTCAGAGAACTC
TGGTGTCTTGGGTGATGTCGCTGCTGGTAAGGAACAAACATTCGGTACCCTTTTCGCAAG
AACTTTGGCACAAATTGGTGGTAAATTGCATTATGGACATCCTGATTTCTTGAATGCCAC
TTATATGTTCACCAGAGGAGGTGTTTCTAAGGGACAAAAAGGATTGCATTTGAACGAAGA
TATTTATGCTGGTATGACTGCTATGTTAAGAGGTGGTAGAATCAAGCACTGTGAATACTA
CCAGTGTGGTAAGGGTAGAGATATGGGTTTCGGATCCATTTTGAATTTCACAACCAAGAT
TGGTGCTGGTATGGGAGAACAGATGTTGTCTCGTGAATATTACTACTTGTCGACTCAGCT
TCCTTTGGACAGATTTTTG
>MATOU-v1_14447025
CTTGAACGCATTGGCTCACGAATCCATTATCTGTTCCTACAACAGAAACACCCCTATCAC
CGATGTGTTATATCCTTACGGTTGTTACAACTTTGCCCCCGCGGTTGACTGGATTAGACG
TTACACATTGTCTATTTTCATTGTGTTCTTCATTGCGTTCATCCCATTGGTGGTTCAAGA
ATTGATTGAAAGAGGTGTTTTGAAGGCAGCTCAAAGATTCTGTCGCCATCTTATCTCGTT
GTCGCCAATGTTCGAAGTGTTCGTTGCTCAAATCTACTCGACTTCATTGATTACTGATTT
GACTGTTGGTGGTGCCAGATATATCTCCACTGGTAGAGGTTTCGCCACTTCTCGTATTCC
ATTCTCCATATTGTACTCCCGAGTACTCCCGTTTTGCTGATTCATCGATTTACATGGGTT
CAAGATCTATGTTGATTTTGTTGTTCGGAACTGTTTCCCACTGGCAAGCTCCATTGTTGT
GGTTCTGGGCATCGTTGTCATCATTGATGTTCTCACCATTTATCTTCAACCCTCATCAAT
TTTCTTGGGAAGATTTCTTCATCGATTACCGTGACTTTATCAGATGGTTATCCCGTGGTA
ACTCCAAGTGGCATAGAAACTCTTGGATTGGTTACGCTCGTCTTTCCGATCTCGTGTCAC
TGGTTTCAAGAGAAAGTTGACTGGCGATGTATCGGAGAAGGGTGCTGGTGATGCTTCCAG
AGCACACAGATCCAACGTTTTCTTTGCCGACTTTTTGCCCACTTTGATCTACACTGCCGG
TCTTTTCGTTGCCTACACTTTCATCAACGCTCAGACTGGTGTAAGAAGGGGACCAAATGG
TGAGGGTAGTCCTACTGAGGTCAACTCTGTGTTGAGAGTTGTGATTTGTTCTTTGGCTCC
TGTCGTTATTGATCTCGGTGTTTTGGCAGGATGTCTTGGTCTCGCTTGTTGCGCAGGTCC
ATTATTGGGATTGTGCTGCAAGAAGACTGGTTCTGTGATTGCCGGTGTTGCTCATGGTAT
TGCCGTTGTTGTGCACTTGGTCTTTTTCATTGTCATGTGGGTCTTGGAAGGCTTCAACTT
TGCTAGAATGTTGTTGGGTCTTTGTACCATGGTTTACATCCAAAGATTGTTGTTCAAGTT
CTTGACGATTTGCTTCTTGACCAGAGAGTTCAAGAACGATAAATCTAACCAAGCTTTCTG
GACCGGTAAATGGTACGGATCTGGTTTGGGATGGATGGCCTTCACACAACCAGCTCGTGA
ATTCTGTGCCAAGGTTATTGAAATGTCGGAGTTTGCCGGAGACTTTATTTTGGCACACAT
CATCTTGTTTGTGCAATTGCCTATCATCTGTATTCCATTGATTGACAGATGGCATTCGAC
CATGTTGTTCTGGTTGAAACCTTCCAGATTGATCAGACCCCCAATCTACTCATTGAAGCA
GGCCAAGTTGAGAAAGAGAATGGTGAGAAGATACTGTACTCTTTACTTTTTGATTTTGGT
TATCTTTGTTGCACTTATTGCTGCACCTGCTGCTATTGGTAACACCACTCTTGTACCAGA
AGACTTGGGTAAATCGTTGAAGGGTACTTTTGCTGGATTGTTCCAACCAAGACACGTTGA
AAACAATGACACTGGTACTACTGTGGGCAAGGCTTACATGAGTCTGCACACGTTCTGGAC
CAACACTCCTACTCACAAGACCACTAAAT
>MATOU-v1_14450307
CTCCCTTTCCCATCCTCCTCTCATATATATACATACATTGCTTGGCTTCATCGTTCGCTT
GAGCCGGCATACTATCCTTGAGCACATACCTACTTCCTGCCATCACCGGGTATAGTTAGA
CACCATGTCTGCTCGCAGCTTCTTGTCCCTCGCCGCGGCGGCCTCCACGGCCAATGCTGC
CTTCCAGGGCTTCAACTACGGCGCCACCTTCAGCAACGGCGCCCTCAAGCAGCAGGCCGA
CTTCGAGGCCGAGTTCACCACTGCTGCCAGCCTCCAAGGCACCGATGGGGCCTTCAACAG
CGCTCGCCTCTTCACCATGATCCAGGGCGACTCCAACAACGACCCCATCTCCGCCATCCC
CGCCGCCATCAGCACCGAGACCTCCCTGCTCTAGACCTCCCTGCTCTTCGGTCTCTGGGC
TTCCGCCGGTGACGAGGCTTTCAACAATGAGATTGCCGCCCTCCAGAAGACCATCGACCA
GTACTGCGACCAGCTCGACGGTCTCGTCGCCGGCATCTCGGTCGGAAGCGAGGATCTCTA
CCGCAACTCCCCTACTGCCATCCGCAACGGTGAGAACCCGGGCGCCAACCCCGACGTCCT
CGTCCGCTACATCAACCGCGTGCGCGAGACCATCAAGGACACCTGCCTCAGCGACGTCGG
CATCGGCCACGTCGACACCTGGACCGCCTACGACAACTCCTCCAACAGCGCCGTCGTCGA
CGCCCTCGACTGGGTCGGCATGGACGCCTACGCCTACTTCGAGGACACTAAGCCCAACGC
CATCGAGAATGGCGCTTCTCTCTTCCAGGCTGCGCTTGACGCTACCCAAGCCGCTGCCGG
TGGTCGTGAGGTCTGGATCACCGAGACTGGCTGGCCCGTCAGCGGAGACAAGTTCGGCGA
CGCGGTTCCCTCGCCCGAGAACGCTCGTCAGTTCTACAAGGATGTCGGCTGCCCGCGCTT
TGGCAACGTCAACATCTGGTGGTACACCTTCCAGGACTCCGCACCGGAGACTCCCAACCC
TAGCTTCGGTGTCATCGGCAGCGAGCTGACCGAGAAGCCCATCTACGACCTCTCCTGCGA
TGGCTCTGGCTCCGACCCCGAGCCTTCCAAGagcagcagcagcagcagcagcGTGATGGA
GCCTGAACCCACCAACACCAAGACCGAGACCCAAGAGCCCGAGCCTCAGCCTACCGAGAC
TCTGCCTACCACTGCCATCGTCGACCCCATcccccccGTCGACCCGACCACCGTCTCGCC
CGTGCCCATCCCCACAGGCAGCTACTGCAACACCACCATGAGCCACTCCACCCCTTCGAC
CACCGTTGTTGTCCCGGAGCCCATCCCCACGACTGAGGACGGTGGCTCTGTCCCTCCCCC
TGAGGAGACTGGCGGTGACGACCAGCCCGCTCCCATCCCTGAGCCCGAGCCCACCGAGTC
TGGCGAGGAGCCTCAGCCTACCACTCCCGGCTCCCCTCAGCCCACGGATGACCAGGGCGG
TGAGGCGCCGAGCGAGGTCCCCGTGGGCCTGGGTGCCAACATGAGGGCTAACAGCATCGG
CGCCGCCGTCGTCGCCGTCGTTGTGGCCGCTGGCATGTTGTAAGGAGGTGATTGTAGGAT
GAAAGATAAAAACCTGTATATCGTACGAGTACGCATATTGGATGACAAGAAATGGTAATG
TTTAACGATACGCTCCTTACGATATAGATGTCGGATATCACGTTGGAATAAATCCG
>MATOU-v1_14451210
CTCGTCGTTCAGGCTCTTCTGGACAGACATCGATAAGTCCAAACCAGAAAGTCGCCCTTC
ACAAAAGAGAAAGCCGCGCGAAGTCGTAAGCGGCCGCGCGAAGTCGTAAAGTTATACCCA
TCCGTCGCGTCCGTGTTGGTGATAAATGCATTCGCTTTCCCCGTGGTATCATCAAAATCA
ACCCCTTCCCAAGATCCCAATAGAACGCCATATCCCAATCCTTCCATGCCCAGAAACTCC
TAGCGAGAAACCTCGCTGTCAAAAATCCCTCCTCTTTCACCTCTCCATCCCAACCATTCC
CCTCGCCCGCTGCCGAAGCCTGGGCGATCGTACCAATAATCCTATTCCTCCGCCCGACAA
CCGCCCTCGGAGCCACCTGCTCCGAAGGCTCATCGTTCACATCAAGCTCGCCGTACATCT
TCAGCACGCCGGCTTCCATGTCCGCCTGGTTCGACTCGTCGCACGGCACGAGCTCGCCGT
CCACCCAGCGCTTGCCCTTGGGCGCTTGCGCCGGAGCATCCTCGGTGCCGTCGAGCTCGC
CGTACATCTTCAGAACCCCGGCTTCCATGTCCGCCTGGCTCGACTCGTCGCAGTCGACCA
GCTGCCCGTCCACCCAGCGCTTCGCCTTCTTGCTGCTGGCGCTGGTGTTCACGCCCGCGG
GGCCGTACGGCGACTCGTAGCCCGCGTCGTCCGCCGTCTTCAGCGCGGCGGAGTAGGCAA
GGTACCAGGTGCGGCCGGCTGGCGCCGCCGTCGAGCATCTGGTCCGTGTACTCGCCCGTC
TTGCCGGCGAAGAAGTCGTAGCTGGCCGAGGAGTCGACGAGCGCCAGGTTCGCCATCAGG
ATGCCGCGCCAGCCGGTCGTGATGCTGCCGGCGCGCGAGGCAAACAGCTGCTCCCACTCC
GTGCGCACGAAGTCGCGGCGCCGGGTGATCGTGCTGAATGGCATCATCGGGATCATGTTG
ATGCCCTGGATGTACTCGATGTTGGCGCCGAAGTACGTCGTGTGGTCGACTTGTTCTCGA
AAAGAATGCCCGCCGCGCGGTTGCGGATGTACTCTTGCGGCTGCACCTCGTTGCTGTCGC
GGTACAGGTAGTAGTTGTCCAGGCTGCGGGCTTGGATGGCCAGCATGAGGTTGCCGCGGG
CCTCCATCGCTTTGTCGCCAGTGACAGAGCCCCACATCTTGATCGCGTACGAGGCCATGG
CGTCCTCCGAGGAGGACTCCTGGTCTTTGCCGTCGGCGCTGGCGAACAGGCCTTTGGCCC
AGGAGTGGCCGTGGTACCAGTCGAAGTTGCGCGAGAAGGGGAAGAACGGGTCGTCGGAGA
TGGAGTTGGCGTAGTCACGGACCAGTGTGTTCACCCAGGCCTTGTTTGTGCCGGCCTTAA
GCCAGCTGGGGTCAAGGTACGCAATGACGGCGGCGGCATAGACGTGGTAGCCGTAGTGGA
AGTGGTGGTCGTTGTAGAACGTGTTGCCGAAGTCCTGGCCGCTGTTGCCAGTCTGGTAGG
AGGCCACGCTGGCGGCACCACCCCATGCGTTCTCGTACACCAGAGGGAACTGCTGCCTGT
TCTCGACGAACCTGGCCATGGCACTCTTCAGCCTGTCCAGTCCGCCCTGAGCAAGGGAAG
CGTTCTGCGCCATGTCTTGTACCGCGAAGACAACGCCGGCATACTTGGCAAGCTCTTTGA
GTACATGGAGTCAAGGTTACTCATCCTGTCCATGTCCTGCTGGAGCTCGGCAGTACCAGC
TTGGTTGATAAGCGCCGCAGCCTCGGCGGAGACAGCCCTGATACTGCCGTAGCCGGGCTG
GTAAGGAGCGAATTCCATGTCAACGGGTAGCTCATTCTCGACCATCGTCCAGCTGTCGCC
ACGAATCGCGACACCGTTGCCCTTGACAGTAGTCATGAGCTTCACGTCCGTCACACCACC
CTTCGTCTCATCCGAGAGCGACTGCATGTGGTGCGGCAGAGCGAACATAAGCAGCTGCTG
GCTCTGGACACCGCCCTTTTGCCAGGAAATGGTATACCTACCCGCAGTACCGTCCACAGA
GCCGGAAATGCTAGCGGACGTTGCGTACGCACCAGCGGCGCTGTCGTAGACAGCCACTGC
ATCACTAGTCTCGGCAGGAATCTTGGCGACCTGGATGGTGCCTTCGAAACCAGAGGGACC
TTGAACGTTGTTTCCATCGATCAGCGTGAAACTGTTGACATCGTAGTTCGAGTCTTGAGG
AGTCACGTATGCCAACCAGGAGAACCCGTTCCTCATCTCCATCCGATACTTGTGAGCAGC
GTTGTTTCCGACAGCGCCGACGTAGGTGATGGTTTGGATCCCGACGCCGGAAGTAATGAC
CGGCGTGGACTGCGTGTAGCGGGCTGTGATGAAACCCATGCCTTGGACTAGGGGGAAGGT
GATCCTAGAGTTGCCGTTGCTGCGAGGGGAAAGGTTCACATTGACAGAGAATCCCTCGAG
GGAGTCAGTGGTCAGCTGTGTGTCCTGGCCCAACTCGGTTGACGACAGGATGACAGAGTG
GACGCCGAGCGGGCTGGCATAGAACTTCCAAGCACCCGTGACCGGGTCTGTCTCTCCCCC
AGCAAACTGCTGGCGCTCGGTGTGCGAGATTGCCATGCCGTAGCTGCCAGTAGCGCCACT
GCCATTGGCCCAAACGACAGAGTACGGGAAAGTGTAGGAAGGCAGAGCCTGATCCTCGAG
GAAGAAGTTGGAGTAGAATTTGTTGGTCTGCAGCTTCTTCTGCTGAGGCTGGATGCCCTT
CCTAGGAGCAGGGTGGTCGTTGCGCCTGGACAGCTGCTGAGGAGGCTCATCGGTAGCAAT
AGGCTGGAAGATGTCGCTGACGGTGATGCTGAGCTTCGTCGAAGTGGTGCTGACATCAGG
AATGGCCACGGTCTCCGTCAGTGACAGGACGACGCTCGAAGTAGCCATTGTCGTGGGGAA
CGGAATGACGGAAGAGCGGCCATCAGTGTTCAGAGACGTGGGCAGCTGAGTCGTAGAAGG
CGCGTTGTCCATGATGGACGAACGTGAAGCAGTCTGAACGGCCGAAGTCGAAAGCATTGT
CAAAGACTCATCAGGGACACTCGGAGGAGTCACTTCGGAGTCTCCTGATGAACTTGCTGG
CGCTTGCACCGATGTGACCGATGCTTGATCAGCAGGCGGAGAGGCAGACACAGAAGTCAG
CGCGGGCGGGGCTTCAGATGATGGCTCGGTCGCAGGCTGAGAAGCAGGCACGGAAGTAGG
TGCGGGAGCAGGCTCAGATGCAGGCTGAGTCGCAGGCTGGCTAGACTCCTGAGTATCAGC
AGGAGCCTGGGTAGAAGTCCGAGCAACAGGAACTTCGGTCGTAGACTCCGCGCTCGGTGC
ACTAGAAGACACCGGAGATGCCGGAGCCTCGCTCTCCTGCTGAACAGACGTGCTGCTCTC
GGTCACCGGAGAAGGAACCGCTGGCGTGGCGCTGGTCACATCCTCCGAAGTAGACGACGG
AGGAAACGGGTTGTAGAAGTCCACAGTCGAGCTCGAGGAAGTTGCCTCAGCGCTAGACAC
GGCCTCTTGCGTAGTCGACGAAGGAGGATTCGGGTTGTAGAAGTCGATCGTTGACTGCGA
AGAGGTAGTGGCAGCGCTGGAGACAATCTCCTGCGTCGCAGAAGATGGCGGGTTTGGGTT
GTAGAAATCTATCGTCGACTGCGTAGAGGTCACAGGGGTGGGCGTGACCCTCTCAGCAGT
AGCCGGGAAACCCGTAGTCGTGTCCGTGTGCGTCGACCATGTCAGCGTAATGCTGCCGTA
GACGAGCGGCGAAGAAGTCAGCGAGGCAGCAGCAGCAGAAGCGCTCGCCTCAGCTTCGCT
CGCAATGCTAGAAGCAACAGCGGCGGCACTATCCACAGCATCGCTAGCAA
>MATOU-v1_14451386
AGGCACCATTCAGGTCGCCAAGATTCCTGCCGAGACGAGTGATGCAGTTGCCGTCTACGA
CAGCGCTGCTGGTGCGTACCCAACGTCTGCCAGCATTTCCGGCTCCGTGGATGGTACTGC
GGGTAGGTATACCATTTCCTGGCAAAAGGGCGGTGTCCAGAGCCAGCAGCTGCTGATGTT
CGCTCTGCCGCACCACATGCAGTCGCTCTCGGATGAGACGAAGGGTGGTGTGACGGACGT
CAAGCTCATGACTACTGTCAAGGGCAACGGCGTTGCCATCTGCGGCGACAGTTGGACTAT
GGTCGAGAACGACTTGCCCATCGATATGGAATTTGCTCCCTACCAGCCCGGCTACGGCAG
TATCAGGGCTGTCTCCGCCGAGGCTGCGGCGTTGATCAATCAAGCCGGCACTGCCGAGCT
CCAGCAGGACATGGACAGGATGAGCAACCTTGACTCCATGTACTACTCTGGCAAAGAGCT
TGCCAAGTATGCCGGCGTGGTCTTCGCGGTACAGGACATGGCACAGAACGCTTCGCTTGC
TCAGGGCGGACTGGACAGGCTGAAGAACGCCATGGCCAGGTTCGTCGAGAACAGGCAGCA
GTTCCCTCTGGTGTACGAGAACGCATGGGGCGGCGCATCCAGCATCGCCTCCTACCAGAC
GGGCAACAGCGGCCAGGACTTCGGCAACACGTTCTACAACGACCACCACTTCCACTACGG
CTACCACGTCTACGCCGCCGCCGTCATCGCCTACCTGGACCCCAGCTGGCTCGAGGCCGG
CACCAACAAGGCCTGGGTCAACACTCTGGTCCGTGACTACGCCAACTCCATCTCAGACGA
CCCTTTCTTCCCCTTCTCGCGCAACTTCGACTGGTACCACGGCCACTCCTGGGCCAAAGG
CCTGTTCGCCAGCGCCGACGGCAAGGACCAGGAGTCCTCGTCCGAAGACGCCATGGCCTC
GTACGCGATCAAGATGTGGGGCTCCGTGACGGGCGATAAGGCGATGGAGGCCCGCGGCAA
CCTCATGCTGGCCATCCAAGCGCGCAGCCTGGACAACTACTACCTGTACCGCGATAGCAA
CGAGGTCCAGCCGCAAGAGTACATCCGCAACCGCGCGGCGGGCATCCTGTTCGAGAACAA
AATCGACCACACGACGTACTTCGGCGCCAACATCGAGTACATCCAGGGCATCAACATGAT
CCCGGCGCTGCCGTTCAGCACCATCACGCGGCGCCGCGACTTCGTGCGCACGGAGTGGGA
GCAGCTGTTCGCCTCGCGCGCCAGCAGCATCACGACCGGCTGGCGCGGCATCCTGATGGC
GAACCTGGCGCTCGTCGACTCGACGGCCAGCTACGACTTCTTCGCGGGCAAGACGGGCGA
GTACACGGACCAGATGCTCGACGGCGGCGCCAGCCGCACCTGGTACCTGGCGTACTCGGC
CGCGCTGAAGACGGCGGACGACGCGGGCTACGAGTCGCCGTACGGCCCTGCGGGCGTGGA
CACCAGCGCCAGCAGCAGGAAGACGAAGCGCTGGGTCGACGGGCAGCTGGTGGACTGCGA
CGAGGCGAGCCAGGCGGACATGGAAGCCGGGGTTCTGAAGATGTACGGCAAGCTCGACGA
CACCGAGGATGCTCGGGCGCAAGCGCCCAAGGGCAAGCGCTGGGTGGACGGCGAGCTGGT
GCCGTGCGACGAGTCGAGCCAGGCGGACATGGAAGCCGGGGTGCTGAAGATGTACGGCGA
GCTTGATGTGAAGGATCAATCTTCGGGGCAGGTGGCTCCGAGGGCGGTTGTTGGAAGGAG
GAATAGGATCATTGGTACTTCGGGATCGCCCAGGCTTCGGCAGCGGGCGAGAGGATTGAT
GGGGATGGTAAGGTGAAAGAGGAGGGAATTTTGACGGCGAGGTTTCTCGCTAGGAGTTGA
ATCGGATCACGGGGCACGGGAGGACTGGGAAATGGCGTTTTGGTTGGATCtttttttttt
GGGAACGGGATTGATTTTGATGATACCATGGGGAAAGCGACTGCATTTATCACCAACACG
GACGCGACGGATGGATATAACTTAACGACCTCGCGCGGCCGCTTACGACTTCTTCGGCTT
TCTCTTTTGTGAAGGGCGACTCTCTGGACTGGACACGTAGGTGTCTGCCTGGGAGAGCCT
GAACGACGACTTTTAGACATAATTATCTTCTCATATGTACGGAA
>MATOU-v1_14457632
CAAACAAGTAGGCACCCATTTACAGCTTACTTCAATTTCCCATCATTTGGTTAACAATAA
ATATTGCTACAAGAGCTATTACTGCTACAAGAGCTATTACTACTACAAGACTTACTTTTA
ACTCATATTTCAAAAGAATGGTACACCACAAAGTTACAATTATTGGATCAGGTCCAGCTG
CTCATACTGCTGCCATTTATTTAGCTAGAGCTGAAATTAAACCAACCTTATACGAAGGGT
TCTTAGCTAATGGAGTTGCTGCTGGTGGTCAATTAACCACCACTACTGATATCGAGAATT
TTCCTGGTTTCCCTGAAGGAATCAATGGTACTGAATTGATGGAAAGAATGAAGAAACAAT
CTGAAAGATTTGGTACTGAGATCATTACTGAAACTATTTCCAAATGTGACTTATCACAAA
GACCTTTTAAATTATGGACTGAATTTAATGAAGATGGTGAACCAATCACTACTGATGCTG
TAATCATTGCCACTGGTGCTAGTGCCAAGAGAATGCATTTACCTGGTGAAGAAACTTATT
GGCAACAAGGTATTTCTGCTTGTGCAGTTTGCGATGGTGCTGTGCCCATTTTCAGAAACA
AGCCATTGGCTGTTGTTGGTGGTGGTGATTCTGCTTGTGAAGAAGCATTGTTTTTGACAA
AATATGCTTCCAAAGTATACTTGTTGGTGAGAAGAGATGTACTTAGAGCATCATCTATTA
TGCAAAAGAGAGCCATGAATAATGACAAATTGGAAATTTTGTGGAATACTGAAGCTAAAG
AAGCAAAGGGAGACGGTAAAGTATTGACTTCTTTGGGAATCTACAACAACAAGACCAACA
CCACATCTGATTTACAAGTTAATGGATTGTTTTACGCCATTGGTCACATTCCAGCCACCA
AGATTTTCGAATCTCAATTGAAGATGGATGATAGTGGATATATCTTGACAAAGCCTGGTA
CTGCTGAAACTTCAATCGAAGGTGTTTTCGCTGCTGGTGATGTTCAAGATAAGATTTATA
GACAAGCAATCACCTCGGCTGGTACTGGATGTATGGCAGCTTTGGAATGTGAAAAATTTA
TTGTTGAACAAGAAGATTAGTTAGGAGAGATGCAAACATACGTTGTTTTCAAGTTGTTGA
CGTGTTTATGTTTTATAGACAAGATA
>MATOU-v1_14471587
CCCGCCTAACTATCACCCTCGCTTACCTCCTTCTTTGGTCACTGCTTCTTCCTCCATCTC
CAACTCCCTCGTTCAGGTTGGATTCTCTTTCTCCTTTCACTCTTCCTTCGTACTCTTGAT
TCTCTCACTCCTTTGAGGATCATCGAATCTATCGGCCCAACCGCCGACAACCTTCTCAGG
TCTTATTGCAACGCGTCTCTGACTGCAAGTCACAACAAACCACAATGAAGGCTGCTATGA
TCTCGGCCCTCGCGGCCTTGGGCGCTGTCACTGCTTCGCCCACCAAGCCCACCGACCTCA
ACCTCTCCAAGCGTGAGGGCGGCCTAACGCCTGTCACTACCAAGGGAAATGCCTTCTACA
CTGGCGACAAGCGCTGGTACATGCGTGGCATCGACTACCAGCCCGGCGGTGCTGCCGCCA
ACATCGATCCTCTTGCCGACCCTGACATCTGTCTCCGCGACATCAAGGAGTTCAAGGATC
TCGGCGTGAACACCATCCGTGTCTACGCTGTCGACAACAAGAAGGACCACGACGAGTGCA
TGAAGGCCCTCGACGACGCCGGCATCTATCTCGTCCTCGACGTCAACAACCCGCAGTACT
CCATCAACCGCGCTGACCCTCACATCTCGTACAACGCCAAGTACCTGCAGAGTGTCTTTG
CCACCGTCGAGATGTTCGCCCAGTACGATAACGTAGCCGCCTTTTTCTCCGGAAACGAGG
TCATCAACGACGAGGAGGACACCGACAAGGCTGCTCCCTACGTCAAGGCCGTCACTCGTG
ACATGAAGAACTACATGGCTCAACGCGGTCTCCGCCAGGTGCCTGTCGGCTACTCGGCTG
CCGATGTGTCCGAGAACCGCCAACAAACCGCCGACTACTTCAACTGCGGCTCTGATGACA
TGCGCTCCGATTTCTTCGCCTTCAACGATTACTCCTGGTGCAACTCCAACTTCCAGACCT
CGGGCTGGGACCAGAAGGTTAAGAACTTCACCGACTACGGTCTTCCCATCTTCTTGTCTG
AATGGGGTTGCATTAAGAACCGTCCTCGTGAGTTCGAGGAGCTCGGAGCCCTGATGAGCG
ATAAGATGACCGGTGTGTACTCCGGTGGTCTCATGTACGAGTACTCTTTGGAGGACAATG
ACTACGGCATCGTTAAGATCGAGGACGGCAAGGTCAACCGCCAGAAGGAGTTCAGCATCT
TCAAGGAAGCCCTCGAGAAGTACACTATGCCCACGGGTGATGGCGGTGCCTCCTCCAAGT
CTCACGCTGTCGACTGTCCGCCCAAGGACCCCTCGTGGCAGGTTGATCCTGAGATGATCC
CTGAGATGCCTGAGGAGGCTCAGAAGTACATGAAGAACGGTGCCGGTGAAGGCCCCGGTC
TGGATGGTTCTGGTTCGCAGCAAGCTGGTGACAGCGGCACGGCGACTGCTAGTGTCAGCG
AGGGTGTGGCTTCTCCGACGGCCGACTCCCAGCAGACCGACAGCTCTGATGATGAGGACG
CGGCTGGTTCCATGAAGGTGGGATTCGCCCCTCTGCTTGTCACGGGGGCCACCCTGTTCT
TCACCGCGTTTGGCGCTCTGCTTCTTTAATGGGGACGTTTGTGATTGTAACATTGTATAG
ACTCTTCCAGCATGTGTTGTCAGTACATCATTTATGAGGCGAATTGGTACGCCCCGGCAG
CTGATCGCCCGGAGGCAAGGTCTGGGTTTGGGTTCTGCCTGAAAAGCTGCGGCTCAGGCT
AGAGTATTATAATTGGCCATTGGCCTCGCTTGAGTTTAGTAAATCTGATCTGATCGAAA
>MATOU-v1_14472008
TCTAAATACCTATATAGCTATATATAACTTAGCAACGACGAATGAAAACTCACCAGTAAA
GTAAAACCAGTGGCCGACTTTTTCTTTCATGCCCCAGTTTAATCGAAATCACAGTTGATG
TTGTATTTCAATTTGTAGTTGGCATCCCAAACACCCCAATGCTTTTCAACATCTGAAATA
CCAGAAGTGTCTGGTTTCCAAGCTTCATCAATAGCTTCAAATACAGCAACATTGACACCC
CAGCCCCTCATGGCACAAATGGCATTTTGCCAAAAGTTTTTGGCATTTTCAACACCTGGT
TGAGAGCTTTCAAAGTTTGATCCATCAGTTGGCCATCCAGTTTCACCAACCCAGAATTCA
ATATCAGTTGATCCTTTAACGGTTTGGATGGTTTGTAAGGCTTGCATGATGTCATCAAAG
AAGGAGTATGAAGCATTTTGGTTGGGAGTATGAAGCATTTTGGTTGGTTTGTCCTTGCCA
GTATGAAAAAGCATTGGCGTAAACAACATCAGCAGTTTCAATTGCTGGTTTAGATCCACC
ATCAACCAAGACATTCCAAGAGTCAACAGTACCAACTGGGATACCCGAGTATGAGTTTCC
ATCCTTGTCTTTGATGTTCTTGACAAGATCCTTGATTTCATTGATTTTTTCAGACAATTG
ATCAGCAGTCAAGTCTTCCCTATAAAGAGCTTCTGAACCAACAAGGAAAATTTTGATGGT
GGAGGTTGAAATTTGAGTCAAGTATTGTTGCAATGCTTGTTTTTCTTCTTCGAAATGTGC
ATCATCATTTGGCCAGATACCCAACATGATTTGGAAACCTTCAGCTTCAGCTGCTGGACC
CAAGTTTTGTAAAGTGTTACAGTCGGATACAGCATAGGTTTTGATGATGGATGATGATCC
CTTGATTACTTCCAAGTCGGACTTGAATTCGTCAACAGTTTTACAGTTTCCGTTGTTGTC
CTTGACACCCAAGTTGAATGCAAGGTCTCCAATTGCGTTGGCAGTAGCAAGCCCTGCTAC
TAAAGCTGATAATAACTTGAATTGCATATTAAAGTAACGAGTGTGATGTAAATGTGAGAA
GGGGTGGTAGGT
>MATOU-v1_14472076
AAAGGACACCGATTTTGGCATTGCTCCGCCTCCTCCCTAACTCCTCCCTCCTCGAACGCA
CAGAACGGACAAGGCTCGAGAATCCCGCGCGACTTCACCCCGACCCGTCACTCTAGCAGC
ACCGACTGCGTCTTTACGCCGAGACGTACGAGGAGACGTGCTCCTGGACGACGCGCTTGA
GGTCGGCCTCGAGCTCCTTCGTCATGAGACCCTTGCCGACCTCCTCGAGGAGACCCTGCT
GCGACGAGGTAAGGAACTCCTTGAAGGACTTCTCCCAGGCACCGATCTGCTCAACAGGAA
CACGGTCGAGGAGACCGTTGACACCTGCGAACACGATGGGCACCTGAATCTCGATGGGGA
GGGGCTGAACACGATGGGCACCTGAATCTCGATGGGGAGGGGCTGGTACTGGCCCTGCTT
GAGGAGCTCGGTCAGGCGCGAGCCGCGGTTGAGCAGGAAGCGGGTCGACGCGTCGAGGTC
CGAGCCGAACTGGGCGAACGCGGCAACGTCACGGTACTGGGCGAGGTAGAGCTTGAGCGA
ACCAGCGACGGCCTTCATGACCTTGGTCTGGGCCGACGAGCCGACGCGCGAGACCGAGAG
ACCGACGTTGATGGCCGGGCGGACACCCTTGAAGAAGAGCTCAGCCTCGAGGAAGATCTG
GCCGTCAGTGATGGAGATGACGTTGGTCGGGATGTAGGCCGAGACGTCACCACCCTGGGT
CTCGATGACGGGGAGGGCCGTGAGCGAACCGCCGCCGTGCTTCTCGCCGAGCTTGGCCGA
GCGCTCGAGGAGGCGCGAGTGGAGGTAGAAGACGTCTCCCGGGTAGGCCTCGCGACCggg
ggggCGGCGGAGGAGGAGCGACATCTGGCGGTACGCGACAGCCTGCTTGGACAGGTCGTC
GTAGATGATCAAGGCGTGCTTGCCGTTGTCGCGGAACCACTCGCCGATGGCCGTGCCGGC
AAAGGGCGCGAGGTACTGGAGCGGGGCGGCCTCGGACGCCGTGGCGGCGACGATGACCGA
GTACTTGAGCGCGTCGTTCTCCTCGAGCGTCTGCACGAGCTGGGCGACGGTCGAACGCTT
CTGGCCGACGGCGACATAGATGCAATAGAGCTTCTTCTTCTCGTCGGCACCGTCGTTCCA
GCGCTTCTGGTTGAGGATGGTGTCGATGGCGACGGCCGTCTTGCCGGTCTGACGGTCACC
AATGATGAGCTCACGCTGGCCACGGCCAATGGGGACCATGGCGTCGACGGGCTTGAGACC
CGTGAGCATGGGCTCGCGGACCGAGGCACGCGGGAGGACACCCGGGGCCTTGACCTGGGC
GCGGCGGCGCTCGGCAGCCTTGATCGGGCCCTTGCCGTCGATGGGGTTGCCGAGGGCGTC
GACGACGCGGCCGAGCATGTCGGGGCCGACGGGGATGTCGACGATCGAGCCGGTGCGCTT
GACCGTGTCGCCCTCCTTGATGGCACGGTCGTTACCGAAGATGGTGACACCGACGTTGTC
GGCCTCGAGGTTCAAGCACATGCCGCGGACACCCGACGAGAACTCGACCATCTCCTCGGC
CTGGACGTTGCGGAGGCCATAGACACGGGCGATACCGTCACCGATGGTGAGGACGCGGCC
AGTCTCCTGGACGTCGGCACCGGCAGTCGAGCCCGAGATGCGGCTCTCGAGGATCGAAGC
GACCTCGGACGCGGCGGGCTTGGCGGTCGCGTACGAGCGCGCGAGGGCCGGGCGGGCAGC
AGCCTTGGTGAGCTGGGCGAGGCGGAGGGAGCGGTGCATGGCTGCGGCACTGGTgggggg
ggATGGTCGAG
>MATOU-v1_14479870
GGAAGCGCCGCCGCACCGAACCAGGTGCAGGTGGTACTCGGTGCCCAATGGGGCGATGAA
GGCAAGGGAAAGCTTGTTGATATCCTCGCGGGCGAGGTCGACGTCTGCGCGAGGTGCGCC
GGCGGCAACAACGCCGGCCACACCATCGTCGCGACCGTCGACGGCAAAAAGACCAAATTC
GACTTTCACCTCCTCCCGAGTGGTCTCGTCAACCCGAACTGCACGGCCTTCATCGGAAAC
GGTGTCGTCGTTCACATTCCGGCCTTCTTCGAGGAGCTCGACAATCTGACCAAGAAGGGC
TTGAACTGCGAGGGTCGCCTGTTCGTCTCGGACCGTGCGCACCTCGTGTTCGACTTCCAC
CAGATTGTCGACGGACTGAAAGAGGTCGAGCTCGGGGGTTCCAACATCGGAACCACCCGC
AAGGGCATCGGTCCCGCTTACTCGTCCAAGTCGAGTCGGTCCGGTTTGCGCGTGCACCAC
TTGTTTGACGAGGAGGCGTTTGCGCAAAAGTTCCGCAAGCTCGTCGAGGGCAGGTTCAAG
CGATACGGCCAGTTCGAGTATGACACCGAAGGCGAGATCCTCCGCTACAAGGAGCTTGCC
AAGCGTCTCAAGCCGTACGTCGTCGACGGCGTCTCGTTCATGCACGACGCCCTCGCGCAG
AACAAGCGCGTCCTCGTCGAGGGCGCCAACGCCCTGATGCTCGACCTCGACTTTGGCACG
TACCCGTTCGTCACCTCGAGCGCGACTGGTATTGGCGGTGTCTGCACCGGTCTCGGATTG
CCGCCCCGTTCGATCGGAGAGACGTATGGCGTGGTCAAGGCCTACACGACCCGCGTCGGT
GCCGGTCCGTTCCCGACCGAGCAGCTCAACAAGATCGGCGAGCACCTCCAGGAGGTCGGT
GCCGAGTTTGGTGTCACGACGGGCCGTCGTCGCCGCTGCGGCTGGCTCGACCTCGTCGTC
ATGAAGTACTCGAACATGATCAACGGCTACACCGCGTTGAACTTGACCAAGCTCGACGTC
CTCGACGACCTCGAAGAGATCCAGGTCGCGGTCGCGTACCACCTCGACGGCAAACCGCTC
CCGGCCCTTTTCCCCGCCGACTTGGACGTTCTCGCCCGCGTCGAGGTCCAGTACGTCACC
CTGCCCGGATGGAAGCAGTCGATCCAGGACATCACCAAGTACGAGGACTTGCCGCAGGCG
TGCCGCGAGTACGTCGAGTACATCGAAAAGTTCCTCGGCGTCCCCGTCAAGTTCATCGGC
ACCGGTCCCGCTCGCGAGAGCATGATCGTCAAGCAATGAGCCTGCTGCCCTCGCCCGAAG
CAAACCCTTCCTTGTCGCTTTCTGTCATAGATCACGGTCCGAGTTTGATTTCGCAAAACG
GTCTGTAGACCTGCCTCCTTTCTTTCTGAATAACCAATATGAATCGACTGCTTTCCC
>MATOU-v1_14483022
CCGCCCCGCTCGAGCCATGCACCGCTCTCTGCGCCTCGCTACCCTCGCCTCCAAGGCTGC
CGCTCGCCCGGCCCTCGCGCGCTCGTACGCCACCGCCAAGCCGGCCGCGTCCGAGGTCGC
CTCCATCCTCGAGAGTCGCATCTCGGGCTCGACCGCCGGTGCCGACGTCCAGGAGACTGG
CCGCGTCCTCACCATCGGTGACGGTATCGCTCGTGTCTACGGCCTCCGCAATGTCCAGGC
CGAGGAGATGGTTGAGTTCGCTTCGGGAATCCGCGGCATGTGCCTGAACTTGGAAGCCGA
CAACGTCGGTGTCACCATCTTCGGTAACGACCGTGGCATCAAGGAGGGTGACACGGTCAA
GCGTACCGGTAACATTGTCGACATCCCCGTCGGCCCCGACATGCTCGGCCGCGTCGTCGA
CGCTCTCGGCAACCCCATCGACGGCAAGGGCCCGATCAAGGCCGCCGAGCGCCGCCGTGC
CCAGGTCAAGGCCCCGGGTGTCTTGCCGCGTGCCTCCGTCTCGGAGCCCATGTTGACCGG
TCTCAAGTCGGTCGACGCCATGGTCCCGATCGGTCGTGGCCAGCGTGAGCTCATCATCGG
TGACCGTCAGACTGGCAAGACCGCTGTCGCGATCGACACGATCCTGAACCAGAAGCGGTG
GAACGACTCTTCGGACGAGAAGAAGAAGCTCTACTGCATCTACGTCGCCGTCGGACAGAA
GCGTTCGACCGTCGCGCAGCTCGTGCAGACGCTCGAGGAGAACGACGCGATGAAGTACTC
GGTCGTCGTTGCCGCCACCGCTTCGGAGGCCGCGCCGCTCCAGTACCTCGCTCCGTTCGC
CGGTACCGCCATCGGCGAGTGGTTCCGTGACAACGGCAAGCACGCCCTCATCATCTACGA
CGACTTGTCGAAGCAGGCCGTTGCCTACCGTCAGATGTCGCTCCTCCTCCGTCGCCCGCC
CGGTCGTGAGGCCTACCCCGGTGACGTCTTCTACCTCCACTCGCGTCTCCTCGAGCGTTC
GGCCAAGCTGTCGGACAAGCACGGCGGCGGATCGCTCACCGCCCTCCCGGTCATCGAGAC
CCAGGGTGGTGACGTCTCGGCCTACATCCCGACCAACGTCATCTCCATCACTGACGGCCA
GATCTTCCTCGAGGCCGAGCTCTTCTTCAAGGGTGTCCGCCCGGCTATCAACGTCGGTCT
TTCGGTCTCGCGTGTCGGATCCGCCGCCCAGACCAAGGTCATGAAGGCCGTCGCCGGTTC
GCTCAAGCTGTACCTGGCCCAGTACCGTGACGTTGCCGCGTTCGCCCAGTTCGGTTCGGA
CCTCGACGCTTCGACCCGCTTCCTCTTGAACCGCGGAAGTCGTCTCACTGAGCTCCTCAA
GCAGGGCCAGTACCAGCCCCTTGCGATTGAAGTCCAGGTTCCTATCCTCTACGCCGGTGT
CAACGGTCTCCTCGACCGTGTCCCCGTCGAGAAGATTGGCGCGTGGGAGAAGAACTTCAT
GGAGCACATCCGCTCGTCGCAGCAGGACCTCCTCGCCGAGGTCAACAAGGGCAAGATGAC
CCCGGAGCTCGACGCCCAGCTCAAGAAGGTTGTCCAGGAGCACGTCTCGTCGTTCGTCTC
GGCCTAAACGTACCGTACGGCTTTTTTCAGTTCACGTCGGAGGCGGGCCCCTGGTAGAGT
GTTCCGTCTCCCCTCAATAGGTCTCTGCAGCCCAAAAATGTCATCTGTTTCTATCCAAAA
A
>MATOU-v1_14498113
CAACACTAGTATATTGACAGAAACAATAGAATAATATAGAAGGTATAAAGAAACAACATG
GCAATCAGCAACAAGAGATCGTTACCACCTGACGCAAGAAATCAAACAAGAGGGTATAAA
GCATTTTAGTAAAACACAAAGTTGGCACTACCCGAAGTAACGGTCACGGTACAACCATCA
GATCCGTTACCATTGTAGGAGCCATCCTCGTACTTACAGTCACCAACGACATTGGCACCG
TCAGCACCAACAATCTTAATGTTGTAGTTTGGAGCGTCTTTGTTGTTAGGGTTAGGAATC
AAAGACAAGTAAGTCTTACCGTTAGTCATACCGGCTCCCAAAACGACAGGAGCCCAGTTA
CCGACACCAGATCCATCAGTACCCCAGATACATCCATCTTCGACAGAAACACCGGCGTTG
TTGACGTAGTATTGAGTGGAGGTCTTACCACCCTTCCAGGTGTAGTAACTGGCAGAATCG
ACAACGGAAACAGGAGCTTTACCACCACCTTCCAACAAGGTTGGAATGTTCATGTTCTCG
GAACCAGGGTAGTCAGTTCTACAGATAGCAACATCCTTGGAGATTTCTGACACAAAAGTG
GCGGTTTGTTCACCCCAAGAACACAAGTAGTCGGAGTCCGAGTTAGTCTTGTACAAGTAA
CCGTTCTTACAGTACAAACCACCAACGGAAATACCATTGGATGGTTGTTCGGAAGGCCAT
TGGGTCTTGGACATACCAGCCTGACAAGCGTAAGAACAGTAGTAACCGTCCTGACAGGTG
GAAGAAGTGTCACCGTTCTCGTTCATGATGGAAGTCCATCCACCGTTCAAGCCGGAAATC
CAGTCAACGGAAATAACACCTTGACCAGTTGGGAGCAGGGAACACTTGTGAACACCATCC
TCAAACTTGTTGTTTGGACCGGAAAAGGCACTCAAGTCACCAGAAATACCACCAGATCCA
CCAGAAGACGATCCAGTCGAGGAAGAGGTCTCGgagctgccagcttgagaagctggagag
ccagaagaagaagcagcagcagcagcagaagaCGAAACAATGGTGGCCACTGTCGACGAA
GCAGCCTCAGTAGGGGCAGCAGAAGCCGAAGGAGTAATGGTTTGGCCTTGTCCATTGACA
TACACAACCTTGGTGACCACATCTCTCTTGTGCAAGTCATGTTTGTGGTGACGGTGACCC
TCCAAAGGAGCAGCCATGGCCACGGTAGCAACAGCTATAAGGGAAAGAATGGACGATTTC
ATAGTTTAAAAGGAATGAATGGAATCACAGTTAGCCACAGATACAAAAAGGAAAGACTGT
AGTTAATAGGAGCTAATAACCGTGAA
>MATOU-v1_14508119
TCTTGGCTCGCTTCCGATGCTGCGCCGAACACCAAGAAGCGCAATGCTCTCCCCCAGGGC
TCCCCGCTCTCAAAGCGTCAAGAGGCTGAAGTGATCGGATACCCTGACAGGAACTACCTT
GAGCCACCGTACCAAATCGACAATACGAACACCATCACCCCCTACGGCGGGCTGTCTAAC
TTCACCGCCGACACTGACATTGTTCACTACGATGGTCATGTTGAGCTTGACGTCCACAAC
CTCTATGGATCTATGATGAGTGTGGCTTCCCGCAACGCTCTCCTCGCAAGGAGGCCCGCT
CGTCGCCCCATGGTCATCACCCGCTCTACATTCGCCGGCGCTGGCCGCAGCGTCGCGAAG
TGGCTCGGTGACAACCTGAGCACCTGGGAGCAGTACAGGATGTCCATCCAAGCCATGCTC
GACTTCACCACCTTCTTCCAAATGCCCATGGTCGGCCTCGGCGCCTTCTACCCCTTCTCC
CGCAACCACAACGGCGACACCTCCATCCCGCAGGAATTCTACCTCTGGGAGACCGTCGCC
GATGCCGCCCGCTCCGCTTACGACATCCGCTACCGCCTGCTCGACTACATCTACACCGCC
CTGCACCAGCAGACCGTCGACGGCACGCCCCTCCTCAACCCCCTCTTCTTCAACTACCCC
TACGACGCCGCCGTCTTCAGCAACCAACTGCAGTTCTTCTACGGCGCCGACATCCTCGTC
TCGCCCGTGACTGAGGAGAACTCCACCAGCGTCACCATCTACGTGCCGGACGACCGCTTC
TACGCCTTCGACACCTGGGAGGTCGTCGAGGGCTCCGGCTCCGAGATCACCCTCGACGAC
ATCGACTTCACGCAGATTCCCCTGCACGTCCGCGGCGGCGCCGTCATCCCCCTGCGCGCC
GAGAGCGGCCTGACGACCACCGAGGTCCGCGCCAAGCCCTTCCAGCTCATCGTCGCGCCC
GACCGCGACGGCAAGGCCAGCGGCAAGCTGTACCTCGACGACGGCGACAGCATCGAGCAG
GAGGCGACGTCGGAGATCGAGTTCAAGTATGAGAACGGCGTGCTGGAGGTCAGCGGCTCG
TTCGACTACACGGCTGAGGACGCGAGGGTGAGCGCCGTTAAGGTGCTGGGATCGAAGAAG
CCCGGCAAGGCGCCGAAGTATGGTAAGAAGGGCAAGGGGAAGAAGAAGTGTAAGGACGAC
GAGTGGGAGTACAAGAAGGGTGTTGTTACTATTGAGATGGATCAGAAGCTCGATGGGCCG
TTCACCGTTGAGGTGTAGATGGATGATGGCTACAAGTTGGACAGGACGAGATGATGGGTG
GAAGGTTTATAACGTAGTGATGAATGTTTCGTACGTAAGACAAATAAAAG
>MATOU-v1_14524716
CTTACAAAttttttttCCGAATATATATGACTATACACCCTCCCCAATCTAGTTAAAGTT
GGAAACAAAATCTTTGGTGATCTTGTGCAATTGGTCCAATTGTTCTTTACTCAATTCACC
CTTTTCTTGGATAGATTTCAACAAGTCAGAGTAGTCAGATTTAAGGTGAGCAACGAAAGC
TTCTTCGAATTCACCGACTTTGTTAACTGGCAAGTCATCCAAGTAACCGTTAACACCAGC
GAAAATGACTGGAACTTGTTCTTCAGCAGCCAATGGGTGGTATTGTTTTTGTTTCAAGAT
TTGAGTCAATCTTTCACCTCTAGCCAAGGTTTGCTTAGTAGAAGCATCCAAATCAGAACC
GAATTGAGCGAAGGCAGCAACTTCTCTGTATTGAGCCAAGAACAATTTCAATGAACCAGC
AACTTGCTTCATAGCCTTAACTTGAGCGGCGGAACCGACACGGGAGACAGACAAACCGAC
GTTAATAGCTGGTCTGATACCCTTGTAGAACAATTCAGCTTCCAAGAAAATTTGACCATC
AGTAATGGAAATAACATTGGTTGGGATATAAGCAGAGACATCACCACCTTGGGTTTCAAT
GATTGGCAAAGCAGTCAATGAACCACCACCGTTGGCTTCAGACATCTTGGCAGCTCTTTC
CAACAATCTAGAGTGCAAGTAGAAAACATCACCTGGGTAAGCTTCTCTTCCTGGTGGTCT
TCTCAACAACAATGACAATTGACGGTATGCAACAGCTTGTTTGGACAAGTCATCGAAACA
GATCAAAGCGTGTTTACCATTGTCTCTGAACCATTCACCAATGGCAGTAGCGGTGAAAGG
AGCAATATATTGCAATGGAGCAGCTTCTGAAGCAGTGGCAGCAACAATAACGGAATATTT
AAGAGCGTCATTTTGTTCCAAGGTTTGGACCAATTGAGCAACAGTTGATCTCTTCTGACC
AACGGCAACATAGACACAGTACAATTTCTTCTTTTCATCTGAACCATTGTTCCATCTCTT
TTGGTTCAACATAGCGTCCAAAGCAACAGCAGTTTTACCTGTTTGACGATCCAAAGCAAC
AGCAGTTTTACCTGTTTGACGATCACCAATGATCAATTCTCTTTGTCCTCTACCAATTGG
GACCAAAGCATCAACAGCCTTCAAACCAGTTTGCATTGGTTCGTGGACAGAGGTTCTTGG
CAAGATACCTGGGGCCTTGACTTGAGCTCTTGAGTGACCTGAAGCATTGATTGGTCCTTT
ACCATCAATTGGGTTACCCAAACCGTCAACAACTCTTCCCAACAATTCTGGACCAACTGG
AACGGAAACAATTTCACCGGATCTCTTGACGGTTTCACCTTCCTTGACTAATCTATCGGA
ATCGAACAAGACTACACCGACTTGGTCGGCTTCCAAGTTCAAAGCCATACCTTTGGCACC
GGAGGCGAACTCAACCAATTCTTCAGCTTGAATGTTGTTTAAACCGTAGATACGAGCAAT
ACCATCACCGACTGATAAAACTTTACCAGTTTCGTTCAAGTTAGCTTCGTCAGAAACACC
CTTAATTCTTTCTTCCAAGATAGCAGAGACTTCAGTTGGGGCAGCCTTGGCTGAAGCAAA
TCTTTGAGCAGTTAACAAAGTTGGACGAGCAACTCTGGCTGATGATCTAGCAGCAACAGC
AGCTGAACGGACTGCGTTACGTAAAACAGGGCGTGCTGACAACATTCTATGTGTAATATG
TGATATGTGTGT
>MATOU-v1_14537866
CCCGAAGAGGTTATTGTAACAGGAACAATTGACAATTGGTCCAAGTCTTACACCCTCTTC
AAACATGGCGATGGCACTTTTACATTGCAAGTGCCATTGCGAGTCCAAAACGAACCCATT
TTGTACAAGTATGTTGTTGATGGTGAATGGAGAGTTAATCCCGATGAAAAAATTACCAAG
GATTTCGAAGGAAATGAGAATAACGTGTTGGATCCTGAGGATTTAAAAGAATTGGTTAGT
ATTCCAGGATCATTGATTCCAGAATCTGGCTTGATTTACAATAATTCTACAACAAAAGAT
GTCGAGGCAAATGACTTGAATAGAGATGCTACTGTGAGCTCATCACAGGGTGATTACAAG
ACCACAGTTATGCCAAAGGAAGAGCCACATCAAACAAGCTTGACTGGAGAACCGGGTATT
CATATCCCTAAAGGTAAGGACCAATTGGCTGCTTTTGAACAATATGAGAATACTGACCCC
AAAGCATTGAATGAAGATGTTAAAGAAATTGGAACTGCAAACACTGAATCACAAAACTTC
AATCAAGGTATCCAAATCCCTCAAGACACATCAGCATTTGAAAAGTTTGAAGATACTGAT
CCAAAGGCACTTAATGAAGATGAAGCTGGATGAAGATGAAGCTGGAACCACTGGTGTATC
AAACTCCAAAGATTTAGGCACCTCAAAACAAGCTCAAGATTCGGAATCTGCATCTGCTGG
AGCAATtgcagcagctgccgcagctgccggtgccgttggtgctggtgctggtgctggtgc
tacagctgctgATTCTTCCTCCACTCAAGGCGATAACTTGAAAAAGGTGAAACGAGTCGA
GTACAAATCTAAACCAAAGCAGGATGCCACCGGAATTGATCAAAGGATTGACTCCAACAC
TGGTTCCAAGGATGCAGAATTTGTTCCTGTCCCTGCAGCAATTGAGACTGGAAATGAGGC
ATCAAGCCAGGATTACAAGAACGATCCAAAGGTTACCCCTGGGTTTTTAAACCGTGAAGC
TGATGCAAACGATGAAATTAACAAGGAAGTGCGCGATGAGTTTGAAA
>MATOU-v1_14552160
TTTAGAACCTGGCCTTTGTCTTCAAATCATCACACAAGCCAAGTGCAACGTGCCTAGCTA
TAGCCATTGTAGAAATCATTGGATTAGCACCGGAAGCAGTTGGCATACAACTAGCATCTG
CGATGTAAATGTTGGATGCCTCAAAGAGCTTACCTTTGGTGTCACAAGCACCATATTTAG
GACCTTTACCAGACATTCTGCAGCTCGACATTTGATGAGCAGAACCATACGGAGTTCCAT
AACTATCAAATGGGATCTTGGCAACCTTTTCTCTCCATTCAACATAATCTTTGTCAGTGA
TGGATCTCTTGTCCTTTGGAATCTTTGATTCAAAGATTGGAACCCAAGGTTGAGGACTTA
AAATTCTTTGAGCACCTTCAATATACAACATGTCCGAGGTAACAAGGAACGCTTGCAAAA
GGGCGTTTCTATCGTACTTGCTGACGTTGTAGTCAATGTATAATGCTTCAGGTCTCTTTA
ATGCTTCAGGTCTCTTTGGATCAGCCGAAACCGAACCAGTGGAAGTATCACGAGTAATTA
ACAACATTGCGCACATGTGGTTGTATCGCAACAAATCTTTCCTAGCTTCGTCACTTCCTC
TCCAAGGTAAAAGTGCAGCTTGAATAAATGGAGTGTTTAATATGGTTTCAATCTTGGCAC
CGTGAGCTTTTCCATCCAAATCGTCAACTTGAGTACAAACCGAAGTCATAATTGAGTTAT
CAAAGTGGTCAGCCTCAACGTCTTGACCAAAATCACCAAACACAGTGGTGACAGGGTGTA
ATGTCAAGTTTTTACCAATGTGTTTGTTTTTGAATCCAGAATTTTGTAAAACAACCGGAG
TGTTTAATGAACCACCAGCAACCACAAACTTCTTAGGACCGGTGATTTTGAATTTTCTTC
CAGTGACTTCATCTTGACACAAGAGACCTACAGCAACTCCTTTTTTGTGCAAAATCTGAA
GCACTCTTACCTGATCCATGAATTTGGAGCCATTTGCGGCTGCATCTCTGAACCAATTGA
CTGAAGAGCCTTG
>MATOU-v1_14630786
CACGCAGTAAAGGACACCGATTTTGGCATTGCTCCGCCTCCTCCCTAACTCCTCCCTCCT
CGAACGCACAGAACGGACAAGGCTCGAGAATCCCGCGCGACTTCACCCCGACCCGTCACT
CTAGCAGCACCGACTGCGTCTTTACGCCGAGACGTACGAGGAGACGTGCTCCTGGACGAC
GCGCTTGAGGTCGGCCTCGAGCTCCTTCGTCATGAGACCCTTGCCGACCTCCTCGAGGAG
ACCCTGCTGCGACGAGGTAAGGAACTCCTTGAAGGACTTCTCCCAGGCACCGATCTGCTC
AACAGGAACACGGTCGAGGAGACCGTTGACACCTGCGAACACGATGGGCACCTGAATCTC
GATGGGGAGGGGCTGGTACTGGCCCTGCTTGAGGAGCTCGGTCAGGCGCGAGCCGCGGTT
GAGCAGGAAGCGGGTCGACGCGTCGAGGTCCGAGCCGAACTGGGCGAACGCGGCAACGTC
ACGGTACTGGGCGAGGTAGAGCTTGAGCGAACCAGCGACGGCCTTCATGACCTTGGTCTG
GGCCGACGAGCCGACGCGCGAGACCGAGAGACCGACGTTGATGGCCGGGCGGACACCCTT
GAAGAAGAGCTCAGCCTCGAGGAAGATCTGGCCGTCAGTGATGGAGATGACGTTGGTCGG
GATGTAGGCCGAGACGTCACCACCCTGGGTCTCGATGATGGGGAGGGCCGTGAGCGAACC
GCCGCCGTGCTTCTCGCCGAGCTTGGCCGAGCGCTCGAGGAGGCGCGAGTGGAGGTAGAA
GACGTCTCCCGGGTAGGCCTCGCGACCgggggggCGGCGGAGGAGGAGCGACATCTGGCG
GTACGCGACAGCCTGCTTGGACAGGTCGTCGTAGATGATCAAGGCGTGCTTGCCGTTGTC
GCGGAACCACTCGCCGATGGCCGTGCCGGCAAAGGGCGCGAGGTACTGGAGCGGGGCGGC
CTCGGACGCCGTGGCGGCGACGATGACCGAGTACTTGAGCGCGTCGTTCTCCTCGAGCGT
CTGCACGAGCTGGGCGACGGTCGAACGCTTCTGGCCGACGGCGACATAGATGCAATAGAG
CTTCTTCTTCTCGTCGGCACCGTCGTTCCAGCGCTTCTGGTTGAGGATGGTGTCGATGGC
GACGGCCGTCTTGCCGGTCTGACGGTCACCAATGATGAGCTCACGCTGGCCACGGCCAAT
GGGGACCATGGCGTCGACGGGCTTGAGACCCGTGAGCATGGGCTCGCGGACCGAGGCACG
CGGGAGGACACCCGGGGCCTTGACCTGGGCGCGGCGGCGCTCGGCAGCCTTGATCGGGCC
CTTGCCGTCGATGGGGTTGCCGAGGGCGCGATGGGGTTGCCGAGGGCGTCGACGACGCGG
CCGAGCATGTCGGGGCCGACGGGGATGTCGACGATCGAGCCGGTGCGCTTGACCGTGTCG
CCCTCCTTGATGGCACGGTCGTTACCGAAGATGGTGACACCGACGTTGTCGGCCTCGAGG
TTCAAGCACATGCCGCGGACACCCGACGAGAACTCGACCATCTCCTCGGCCTGGACGTTG
CGGAGGCCATAGACACGGGCGATACCGTCACCGATGGTGAGGACGCGGCCAGTCTCCTGG
ACGTCGGCACCGGCAGTCGAGCCCGAGATGCGGCTCTCGAGGATCGAAGCGACC
>MATOU-v1_14643019
CTCTGCGCCCTCGTCTCGTCTACATCCCTCTTCGGCCAACCATCAGAAGCGCAAGATGCC
GTCTGCTTGGTCGATCGGTACGGCCGTCGCGCTCGCCGCGTCTCTAGCGGCCGCGAGTCC
GGCTGCACCTCCATCGTCCGACGTCGCAACGCAGCGATTCGCGCGGCAACCCATCGACTG
GAAACTCAAGCAGCGCTCGTCCATCACCAACGCCAACGCCATCGTCGGAGGGGGGACGGC
AGGTCTGGTCATGGCATCGAGGTTATCCGAAAACTCTTCCGTCACGGTGGCGGTCATCGA
AGCCGGCACTACCGGAGACGAAGTCGAGGACAAGATCCTGCCACCTGCCATCGCCTATTT
CGGCGGCATAGCCAACCAAGACTCAACCTATGACTGGCAGTATTCTACGACGGGCCAGGC
GCAACTCGACAACCGGAGCATCTTCTGGCCGCGAGGAAAAGTCCTCGGAGGATCCTCGGC
TGTGAACGGACTGTACATGATCCGTCAGTCGGAGATCGAGCAGGATTCGTGGGCCGAGAT
GGTCGACGACCACGCCAACTGGGGCTGGGCTCCGGTCTACGCCAGCACGAAGAAGAGCGA
AAAGTTCACTCCGCCGTCCCAGTATCACATCGACGAGGCGAGCATGGTCATCGACGAGAG
TCTGCACGGTACCGACGGACCGATCCACTACTCGTACCCCGGAATATTCTACAACTCTAC
GTACGAATGGATCCCGACTTTGGCCAACCTTGGTGTCGGTACACGCGACCCGTACGGCGG
CGACTCGTGGGACGCCTTCATCGCGACGTCGGCGATCAACCCGACCAACTGGACGCGCTC
GTACTCCAAGACGGGCTACCTCGACCCGATCGACTACCGCACCAACCTCATCGTCCTGAC
GGGCTTCCAGGCGACCCAGATCACCTTTGACGGCAACAAGGCGACTGGCGTGGAGTTTGC
TGCGGCAGCGGCCGGCCAGACGTATACGGTCACGGCGTCAAAGGAGGTGATCCTGTCGGC
GGGTGTCATCGGTACTCCGCAGCTCCTGCAGGTCTCGGGTGTCGGTCCCTCCGAGCTCCT
GACCCCGCTCGGGATCGACGTCGTTGCCGACCTCCCGGGAGTGGGCATGCACCTGACCGA
CCACTTGTCCGGCGCGATCACGCTCAACACGAGCTTCCCGTTCTCCGGAGATCCCATGGA
GACCAACACGACCTACGCGGCTGAGCAGCTCGCTCTCTGGAAGGAAGGCGACCCCAACTC
GCTCTACACCTCGCCGAACGACGCCGTCGTCTACGTCAACTTGACCACCCTCCTCGGCTC
CGAGTCGGCCGCGCAGCAGTTCATGGACGACCTCGCCGCCAACAAGTCGGAACAGGTCCA
GGCTTACTCGAGCAACGCGCAAATTCAGGCCGGGTACAACGCGACGTACACGGCCGAGCT
CCGTGACGTCTACCCGTCCGCGGTCGGTCAGGCCGAGATCCTCTTGTCCAACACGGGCAC
GTACGGCGGGTACCCCGGAGCGGTGACGGTCCAGATCCAGGCTGCGATCCAGCACCCGCT
CTCGCGCGGTTCGGTCAAGATCAACAGTACGAGCACGTTCGACAAGCCGCTGATCGACCC
CGGTTACCTCACCCACCCGGGCGACATTGTCATCCTCCGCGAGGCGTTCAAGTACGCCCG
CAAGGTGTCGCAGACGGCGCCGTTCGCCGACTATGTCTACAATGAGCTGGCGCCTGGTTC
GGCTGTCCAAACCGACGCCGAGTGGGAAGCGTGGCTCCGTGGCGTCGTTTCGACCGAGTA
CCACCCGGCCGGCACGGCTTCGATGCTGCCCGAGTCGCAGGGCGGCGTCATTGACAACGC
GATGCGCGTGTACGGCGTCTCGAACTTGCGTGTCGTCGACTCGTCCATGGTCCCGCTCAG
TCTCTCTGCTCACATGACTGCGCCGCTGTACGGATACGCCGAACGCGCCTACGAGATCAT
GCAATCGACTCCGGCGGCTGTCGGCGGCTCGGTCGCCACCTCGAACAATAACAACTCGAC
CCCGAGCAGCGCCTCGAGCAGCGCTTCGTCCCCGTCGAGCACCTCGGCCTCCAATGGTAG
CGCGACCGCCGCCAACAATGCCGCTCAGCAGACTGGCACGTCCGGTGCCCTCGCGGTTGC
GCCCAAGACGGCTCTCGCCTCGCTCGCGATGTCGGCCATCGCCGCCATGTTGATCCTGGC
TTAGGCGCACCCCATTCCCGATCATCTATGCATATATCGTTACTTCCCCTTCCCTCTTAT
TACGCTGCATCCACTTTCGCATCTCGAGCTTTTCATACCCCGCTCTACGACCCCTCGTTA
TTCCCTTTGCCGTCAGTCGTTCCCACTTCGCACACTCTTTTCACGACTCGTATTCGCATT
CATCGCAGCAGCATTCGCGCGGTCTTCTCTATTGACCGTCGAGTTTGCGCGCGGGGTCGG
TGGGATCCGACACTTGTAGCTTCCTCTTTTCTTTCCGAGCAAAGACACT
>MATOU-v1_14646482
CGGGACTCTACACCCTTGCTGGCCCGGCAAGAACGACCTGTCACCGGCTGCTCGCGCTTT
CGTCGACTCGCTCTCGCCTGATCGTCCTGGTCCGTTCTTCTCGGCGTCCGTTACGGAAAA
AAGGAAAACGACACGTCCAAACACTCGCTCTGCAAGGTTCGCACAACTTCTTTCGATACG
TCCCGCCATGCACCACATCGTCCTCCTCGCCGGACTGGCCGCCGCCGGTCTCGCCACCGC
CGCCAACGGCCAAGTCGCGTCGCCCCTTCATGTACGAGCCGCTGCCGAACCTGCCCGGCT
CGAACGGCGACAAGCGACCGCACAGTCTACGGGAGCTACGAATGCCGCGACCGCTACGGC
CACGGGTGGTCGGTCGTTGTCGGCGAGTGCATCAGCGGCATCAGCGACCATTACGGGCCA
GCCTGCAAGTGGCGGTCCGGTCCCCTCGAAGCCATTGGAGAGTCTGTCCAGCATCGGTAC
GGCGACCACGGCCGAGGCGACCCAGCCCCTTCCGACTATCCCGGCTGCAGGCGCTACTCC
CCCCGTCAAGGGTGCTCCTCCTCTGCCAAACATTGCGACCCTGAACCCGGCCAACTACCC
TCCCTTGGACCGGATGCCTCCGCTCGACTCGCCCGAAATGAAGGAATGGCTGAGCGAGAT
CGACTTTGACAACATTCCCGACGTCAGCCCGACCGGCCTCGGAGGGTGCGCCAACGCGAC
CAACGCCATGGCGGTGCAGAACGGCGGCGAGGATGGCGCGTGCTGGTGGACTTGCGGAGG
CTGCACGCGTGCCACCGACATCACGTACTGCCCGAGGAAGGAAGACTGGGGTGCTTCGTT
CGACGACGGCCCCTCGCCGTACACGCCGCGACTGCTCAACCTCCTGCAGTCGCAAAACAT
CCAGTCAACCTTCTTCATTGTCGGATCGCGGGCCATCTCTCGTCCTGAAATGGTTCAGGC
AGAGTACATGCTCGGTCACCAGCTCAGTGTGCACACTTGGGCGCATTCTGCTCTGACTAC
GCTCTCGAACGAGGAAATTGTCGCCGAGCTCGGCTGGACCATGAAGGTCATTCGCGACAT
CACCGGCGTGACGCCGAACACCTTCCGTCCTCCTTACGGCGACATCGACGACCGCGTCCG
GTACATTGCGCTGCAGATGGGTCTCCGCCCGATCATCTGGACCCAGTACGATGGCCAAGT
CTTCGACACCCGCGATTGGCAAATCGGCGGCGGCGTCGTCTCGGCGACTCAGGCGTACAA
CAACTTCAACTCGTTCCTCGACAATGCGATGCAGACCCTGCCGCACGGGTTCATCGTCCT
CGCGCACGATCTCTATCAACAGTCGGTCGACCTTGCGGTTGACTATGTCCTGCCAAAGGT
GATCAACGCCGGTCAGCTCAAGATGAAGACGATCGCGTCGTGCCTGGGCCAGTCGCTCGC
CGACTCTTACATCGAGACTGCTGAGGACTCGGGTTCTTCGGGcgacgacgacgacaacga
cgacgacgaTGAAGCCGAAGATTATCCTCTCGTCCAGACGACCTCGACTGTCGTCGGCGC
GACCGGCTCCGGCTTCGTCTCCAAGATCGGTCTCGTCACCGCCGCATCCACCGCATTGTC
TTCCAGCTCCGGTGCTGCCGCAGCCAGCGCCGCCGAGTCGGACCGGCCGAAGCAGAACTC
GCCGGCGTCGAGCGCCAACCGCGGTGCGGTGGTCGGGTCCGCAGTGACTCTGGTCGCCGG
AGCGGCAGCGGCTCTCTTTGCGCTTTATTAGCTTTGAAGCTCGCGCCGCGGGCTCTGAGC
TCTCTCTTCTCTCAGCTTGTCTTCAACAACGCGCGGTGTGGAGCTCTCATTACGAGTCAC
GAGACTCACGACAGATCGGTTTCTTTCCAGACACTCTCTTTCGCTCTTTCACATCGTATC
GTATCGTACCGTATGTAGACAATCATCGCCTTTTCCATTGCAACTGCCATCACTCGTTTT
AAGCTCGAAAAAA
>MATOU-v1_14646969
TGGGTCTCGATCCCTTTCAACGACACGGCTCGCCCGCAGCGCGACGTTCCGGCCTTGAAC
GAGGACTGGGACTATGTCAACAACCGCATTGCCGGCGTCAATATCGGAGGGTGGCTGGTC
CTCGAGCCTTTCATCGTTCCGGGCATGTTTGAGCGGTTCAACTCGCCGACCGACTATGCC
AACCCGAACGCGACCACCAACCCGGCGATCGACGAGTGGACTCTTTCGGAGCAGCTCGGT
TCGAACCTGACCAACGCCATGACCGAACACTACGAGACGTTCATCACCGAGAAGGATTTC
GCCGAGATTGCCGCCGCCGGTCTCAACTGGGTCCGGATCCCGTTCGGCTGGTGGGCGATC
GAGACCTGGGACGGCGAGCCGTTCTTGCAAGGTGTCGCGTGGACTTATCTCCTCAAGGCG
ATCGAGTGGGCGCGATCTCCTCAAGGCGATCGAGTGGGCGCGCAAGTACGGCCTCCGCGT
CAACCTCGACTTTCACGCGATCCCCGGTTCGCAGAACGGGTACAATCACTCGGGCAAGCA
GGGGAGTATCAACTTCCTCGCGGGCGTCATGGGCGTTGCGAACGCGCAGAGGACGCTCGA
CTACATCCGCACGATCACCGAGTTCATCTCGCAAGATCAGTACAAGAACGTCGCGTCCCC
ATGTTCTCTATCATGAACGAGCCGTACGCCGCCTCGATCGGCATGGACCCGCTCCGCTCC
TTCTACCTCGAGACGTACAACATGATGCGCGAGATCACCGGCATCGGTGAGGGCAAAGGT
CCCTTCATCGCCTTCCACGACGGCTTTTCGTCGCTCGCGGCGCCGGTCGCTGCCGGCGGC
TGGAACGGGTTCCTCAAACCAGGCTACGCTTCCGTGCAGCTACTGGGCTGGACCGCTCAA
TAGCTCGACGAACGCTTTCGGCGTCACGCTCGGCGCCGAGTGGTCCCTTGCGATCAACGA
CTGCGGCAAATGGCTCAACAATGTCGGTAACGGCAACCGCTACGACGGCACGTACTACAT
TCCGGGCCAGCCTGCCATCAAGCCCGAGTTTAACGCCGTCGGCAGCTGTGAACCTTGGAA
CGACTGGAAATCGTGGAACCAGACGACCAAGAACGGTTTGCGCATGGTCGCCGAGGCGCA
CATGGACGCTCTCAAGCACTTCTTCTTCTGGACCTGGAAGACGGGCTACTCGAGCACGAT
GGGCCAAATCGCCAACCCGATGTGGAACTACCAGCTCGGCCTCGCGGAGGGTTGGGTCCC
GTCGAACCCTCGGACCGCGGTCGGCGTCTGTCCATCGCTTGCCGCCGCGCAGGGCATCAC
TTACGAGAGTACCGCGGCTCCTTCGCTCAGCGCCTGGATGACAGGAGGATCCGGTGCCGG
CCGCATCGTCAACCAGACCATGTCGGCCCAGTACTCGCAATGGCCGCCCGCGTCGATCGG
TGCCGGAGCTTCAACCGGTCCGCTCTTGACGCCGGTCTCGAATTTGCCGACCTACACCCA
GACCGCGAGCGTCTACACGATGCCGCCGCCGCCTCAGCCGACCTCTTTCCCGGACGGGTA
CGCGTCCAGCAGCGTCGACGTCGGAAACGGCTGGGCTCAGCCTTCCGACTCGGCGAGCTT
CTACACGCCGGTCGCTGGCTGCTCGTACCCGAACGCGTGGTCCGGCGCCGGTGTCGCGAT
CCCGACGACGGCTTTCTGCGCCGGTAACGGAGCTCGCATGAAGCGCAACATCAAGTCGAC
TGCGACGATTGTCTTCCAGCCGACTCCTGCACCTACGCCGGCGGCAGTCTAACACCCTGC
TGCTGCCCGCCTTGTTACCACTTCTGTACATTCCCCGCGTCGAGAGACGTGCCCACCTCC
GATGTGTTGCACTCATCGTCGCGCCTGATTCTCTGCATACCGACCCCTTAACGACCCCTT
CGCATGGTTTCCCGGCCCTCAACCAGTGACATTCTCTTCATCCTTCGGCTTGTCAACGAT
CGTATCCAAACCCATGTTCTCTCTCTCCACATACCGTGTCTCATAGTCCCTCCTTTTGCT
CTCCTGGTCTCGCTTACCCACAGACACTCGAGTTCGAACTGCATTGCAC
>MATOU-v1_14648798
CTTTATAGtttttttCCTTTGTTCAAGACAACCCTACAAGCGGGGGTGATAGGCACTGTT
TGTGGACTGACTATGTATCAagagagaagagagaggagagaAGTTCGAGGGACAGGAGAT
CAGAGGACGGAACCGAATCTAGGTGTTTTTCGTGTGGCTCGAGGAGCCGGACCCATCCAC
GGCAGCGGAGGCGAGGCCTACGCCGTTTAGACGTTGTAGGTCGAAGCCGAGACGTTGCCA
CCACGGCCAGTCCAGTTGACGTGGATGTCCTTGCCCTCGGGGTACTTTTCGCTGGCAAAC
TGGGGGAGGACGCGGAAGGTGTGGGCGCCAAAGTAGTCGCGCTGGGCCTGGAGGAGCGAA
GCGGGAAGGCGCTCGGTGCGGTAGCCGTCAAAGAACGACAGGGCGGTCGAGAACGCCGGG
GTCGGGATTCCCCACAGGGCGCCCTGGGCGACGATGCGGCGCCAGCCGGGCTGGGCGGTG
TGGATCGCCTTGTTGAAAAAGTCGTCGAACAAGAGGTTCTCGAGGTCGGGCGTCTTTTGG
AACGCCTTGGTGATGTCGCCGAGGAAGACGGAGCGAATGATGCACCCTCCGCGCCACATG
AGGGCGATCCCGGCGTTGTTCAAGTGCCAGCCGTAGTCCTTGGCGGCCTCGCGCATGAGC
ATGAAGCCCTGGGCGTACGAGATGATCTTGGACGCGTAGAGGGCCTGCTCGAGGTCGTCG
ATGAACTGCTTCTTGTCGCCGGTGAAGGGCTCGATCTGCGGTCCGCCGATCTTCTTGCTC
GCGCGGACGCGCTCGTCCTTGATCGACGAGAGGCAGCGCGCAAACACGGCCTCGCCGATG
AGGGTGACGGGCATGCCGAGGTCGAGCGCGTTGGTCGCGGTCCACTTGCCGGTACCCTTC
TGCGACGCGGCGTCCTTGATCTTGGTGACGAGGGGGACGCCGTCGTCGTCGTTGTAGCGG
AGGATCTCGGTCGTGATCTCGATCAGGTACGAGTCGAGGACGCCCTTGTTCCACCGCTCA
AAGATGTCGGCAATCTCCTTCTCGTGCATGCCAAAGCCGCGCTTCAGGATGTCGTACGCC
TCGGTGATGAGCTGCATGTCGCCGTACTCGATACCGTTGTGGACCATCTTGACGTAGTGA
CCGGCACCCTGCTCGCCGACCCAGTCGCAGCACGGCTGGCCGTCCGTCTGGGCCGCCGTC
TTTTGGAAGATCTCCTTGATGTGGGGCCACGCGGCGTTGGACCCGCCGGGCATGAGCGAC
GGTCCGTAGCGGGCGCCCTCCTCGCCGCCCGAGACGCCCGATCCGACAAAGAGCAAGCCC
TTGGCCTCGAGCTCCTTGCAGCGGCGGTTCGTGTCGGGGAAGTGCGAGTTTCCGCCGTCG
ATGACAATGTCGCCCTTTTCGAGGTGGGGTTCGAGCTGGGCGATAAAGTCGTCTACGGCC
TGACCGGCCTTGACGAGGAGGATGATCTTGCGCGGGGTCTTGAGCTTGGCGCAGAGCTCC
TCGACCGAGTGGGCGCCGACGATCGACTTGCCCTTGGCCTCGTTCTCGAGGAAGTGGTCG
ACCTTGGAGACGGTGCGGTTGTACGCGCAGACGGTGAAGCCCTTGTCGGCCATGTTGAGG
ATCAGGTTCTGGCCCATGACGGCAAGGCCGATGAGACCGATGTCGGCGACAGCCTCGGTA
GACATTCTGGCAGGTGGTTCGAGTTGGTGGAGCGTCTGGGACAAGCGAACTGTAGCCGTG
GTGGAG
>MATOU-v1_14651524
CTTGAACGTCTTTGAAGCCCCCACGGGCGCCGGTTCGGCGTACCAGTGGTGGTCTTCGGT
CGACGGCAACTGGAACTGCGTCTGCAACAAGGGGATGACGATGGGCGCCCTCGCCATCAT
CAACGAGGACCCGACCAACCGCGCCAAGTCGTTGCTCGGGTACACGGTCCCGAACGCGAA
CGCGCACTGCGCGTACTCCCCGAGTCCGGACGGCACCTGGTCCGAGACGGCCAACTACTG
GTACTTTGGCACCTACTCGCACGTCGAGATGGCCGCGTCCCTCTTGTCGGCGACCGGATC
GACGCAGAACCTCCTCGATGCCAACCCGGGCATGAAGCTGTCGGCGACGTACCACATGTA
CGTGACGGGACTGCAGGGGTTGTTCAACTATGGAGACGCCGGCCCCAACAAGTACACGGC
CACCGCCAACGGGTTGATGTTCTACGGTCAGCAGTACGACATGCCTCAGTACACGCTGTT
CCAGCGCGACCGCGGCGACGCACCCGAACCGATGTCGCTCCTGTACTACAACCCGGCCGT
GTCGGGCCAGTTCTGGGACGGCCTCGCGCTCGACCGCCACTTTTCCAACACGACCGACGC
GTGGTTCTCGGGTCGCATGTCGTGGACGAACCAG
>MATOU-v1_14672670
GCGACAGTGTCTGTTTGCAGCTAGTCTACAGGGGGAGCGTACCACAAGAACAGCAAGGAG
CGGGATGAAGGCGTGAGGTGGTCGTGTAAAGGGGTGATGGTGCGGTATGAGGAGTTAGTG
GAGATGAGGATGAGTACGCTGGGACAGCGAGAATAACAGAAGAGATCCGAGCCCATGCAA
TGGAGAGATGTCGAGTCCAAAGTGGCGGGTAGAAAATCCTCGCACTTGCTGTTTAGGAGA
ACCTAGGAGCAACCGGTCGCCGAGAGACGGTTGCGCGGAGTCGTGTAGTTCGTTTGCGAG
AACATTGTCTTGTTCGGGTTGGTGTAGAGGTCCATGTGGCTGTTGATGTACTTGGATGTC
GGGTAGTCCTTCGGGTCGCAGCCGACATTCTTCTGTCCCTTCTTCTGGTACACTCGCACG
TAGTCGATGCGGAAGTGGGCGGGGAACTGAAGTTTGCCCCACTGCGGCGTCTGGAAGGCG
TAACTCGAGGCCAAGTTCATGATCATGTACATCGGCTCCACACTGATGAGACGCTGTCCA
ATCTGCGTTCCGGCGTTGGGCAGCATCGCCGCGGCATTGATCTGCCACGTCGGCTCGCCC
TTGTACGCCCACGTGATGCGACCGTCCGCACCGGGGTCGTACTCGTAGCTGTAGGTGGCG
TAGCCGGCACCCTCGTAGGACGTGTCGTCGGTCAAAGTGTTGAAGGACGCCGACTCTTGC
GAGATGGAACCAGTCCACATGTTCTGCGTCGAGATCGAGCTGTTCCACACCCTCAAGCCC
GGGTTCTCTGCGGTCGTGTCGTTGCGCCACAAGTAACCGCTGTCCATGGGTGCGAACTGG
ATCGACTGCGAGGCCCATCCTTGCTTGCCGTTCTGCGCGACCTGACCCTCGAGGACGTCG
ATCTCGGGAGCGCCGCGGCCGACGTTGACGGAGGGACCGGGGTGCTCGTCGGCGTCGGCG
GGACAAGTGCACGCAGACATACGTTGGCCAACAAGGTAAGACAGCTCGCCGCCATAGTCG
GTCGAGCCAGAGTGTTTGGCGTCGTGGGGGTCAGTCCCGTTCGGCCATGTCTGGTTAGGC
AAGGTGCCCACGTCGCACGAGTCGTAGGTATACGGCCAGACGCCGTCGACGGAGGAACCA
TAGCCAGCGCGGCCGAGGTTGCCCATCGTCCAAAGACCGGGCCACATTCCCTGCGCGACC
GGGCCACATTCCCTGCGCTGTCGGCTGACCGGGCAGAGAGACGTTGAACTCGATGTAGCC
TCCGGTGAAGCACATCTTGTTCCAGCTCTGCACCATTCCGGACCGGAAGTTGAGTCCGTT
CCACGGCTCCTGCGTCATCGTGATGACCATGTCGCCTCCCTCGGTGACGACCGCGTCCGG
GTCGTACCATTCGAGGTCCTTGGTACCCCAGTAATGCAGGTCGACCGCCTCCCAGAACGG
GTCGTCGCCGGGCCAAAAGGTCCTCCCGTCCGTGTTGAACTCGTCCGAAAAGACGAGCTC
GTAGTCTTGACCGTCGAAACCGGTACGGGTGTAGGCGTTGGACGGCGTGGTGCTGTCGAT
CAGGCTTGGCAGGTTCGGAATCTGGGGCACCTGACCCGTCGAGTTGGTGATGGTTTGCGC
TGCATAGGCTCCCCACGAACCATCGATAGCATATCGGTAGATCGGCCACCCCGCAAACAA
TCCGACGAGGACGATGACCACGATCATCAATGCCGCCGTGTTGATGAGCGCCATGATACT
AATCTTGTGCATCTGTTTGTCCATGGCCTTGTCGAGAGCGGGATCGGGGTCGTGCAGGAA
GTCGTCCGGCTCCTTCTCCCACAGCAAAGCAGCGCCCGCGCCACCTCCTGCGATTCCTTC
GAGGCGCGAGACGCTATACCGCGAGTTGCTCGGCTGCATCTGCGGACTCGTTGCGACGTA
TTCCTGCGACCCGTACTCGTCCTCCGTCATCCGCGGCGAATCTGCGCCAGCATTTGCACT
GGCGCCACCGTACGGGAGCGAGACGGGGTCGAGGCCGATCGAAGACGAGGCGAGGCTGTC
GCGATGAGAGAACGCGGGCGGCCGACTGGTCGAAAAGGTGGACGACCGCGGGAACGGCCC
AAAGTTGCCTCCGACTGCGCCGGTCAAGACGCCAACGGCCCAAAGTTGCCTCCGACTGCG
CCGGTCAAGACGCCGTAGGCAGCGGCGTCGAGTTGGTCCTTGGAGGCACTGTCGCGGCGT
CCGCTGGACGAGAGGGTCGATTCGGACGAGTCCTCGGATTGTTGGAAGAAGCCCATCGCA
CTCAGGCTGCGACTGACGCGCGAAGATCTCGACCCGCGCGGGATGGACGACGACTGTTCC
TCCTGCTCGAGCGAGCTTGGCGGTGAAGGCTGTGTCATACTGCGCTATGCGGTAACCGTC
GCTCCGACTTGCGCGTCCGCTGTTGCGAGAGTTGCGGGTGTTTGGGCGGAAGCGGAAGAT
CGACGATTCGGGGATTCCGTCGTCGGCGAACGAAGGTGCGCGGGCGCGTGGGCGGATGTG
TGACTGAGGTATATAGACCGCGTCGATGGTCCTTGGAGTCGAG
>MATOU-v1_14673575
TTCCTCAGCGCCAAGTCTGCTGCCACAGCGAGAGGAGCGGCAGCATCCGGCAGCAACGAG
CATGAGGAGCCGCCGCGACTTGTCGATCGGTCGCTCGCCGACGTCCACGACGTTGAAGCC
AACGAATTTGCCGATCTTGTTAACACCGTCATCATCGTCTATACGGCTCGCACTCCTCGC
CTTGATCTTCGCGGTCATACCGTCGACGTTCGCCGCCCCGTCTACACCAACCGAGCTCCA
ACCGGAACCGAAACAACTCGCCGTCTCGTCCGTCCGCGACGCGCCCGGTCTCCCCTCGAA
CGGACTCGTCTCGAACGGGATCCACCTCGGTTTCCTCCCCTTCTGGTCCGACGAAGGTCC
CCGCGCGATCTGTACCGCCCTCGGATCGTGCGCCGCCATCTGGGGCGACTACTGGAATGT
CGGCACGAGCCCGGGGACGTACACGTTTGCGCAGGCGGATTATCATATCGACGAGATTCA
GAGGGTCGTCGGAGGCGACGTCAAGGGCGTTTATGCTCCCGCTGTGTTGTTCAGCGGGAG
GATGGACCAGTGGACCGACGCGATGACGACGCAGTTGGTCTCGACGGTGCGGTCTATCAA
CCGGAGAGGCATCACCGTCTGGTTGCGGTTCTGTTACGAAATGAACGGAGGCTGGATGAG
CTACGGCTTGCAGCCGGAAGAGTACGTCGCGGTGTGGCGGCGCGTCACGACTGCCATCCG
CGCCGCGACGAACGAGACGTACATGTTCTGGGCGCCGAACCTCTGGAACGGTCCCGTCGA
CGATTCCGTGCAGGGCTACACGCCCTACTGGCCCGGCGAAGACTACGTCGATGTCGCCGG
TTTGAGCGTGTACTGGTTCGGCCCCGAGCGGAGCATCAACCAGGTTCCCGAGACGGGGTC
GTTCCGCGAATCGCTCCAACCGTTCTACAACCTCGTCGGTGGTGCGGGCTCGAACCCGCT
CAAGCTGAAACAAGGCTTCCCCGTCGTGGTCGCCGAATCGAGCGCGCCTTACTACTTCGA
CATCCCTTCCTCGTCGCGGTACTATACCCAGCAAGGCGATACCGATATCCAGCCCCCGTT
GCCCAATTTGAACAACTACCGGGCGTCATTGAATGAGCCGAACCCGTACCCGCGGAGCGA
TGACGAACTCGCCGTCAAGGCGACTTGGATCGCGCAAATGACGGGCAACTCGACTGCTCA
GCGGTTCCCGAACCTCAAAGCCATCACCTGGTTCAACTACCTCAAGAAAGGCAACGCAAC
TGCAGAGGTACTCGCCGATTTTCGCTTCGTCGGCGGCAACTCGACAGTCACGAGCTGGCT
CCGAGAGAACTTTGGCAACCAGACTGCCTACGAGCAAGGTTATACTGGAGCGGCCTCGTC
ACTCCGGCAGTCATCGAGTGCGATCATCGCCGCGCCCCTTCTCGCCGTCCTGATCCTCTT
CCTCTCCGCATGAGATCCCATCCAAGACTATACCCATCTAGACTCGGTCAGATAGACAAG
TTTTGCATCCTTTTTTC
>MATOU-v1_14677417
CGAAAGCGATTGCCAATGTCACGAGGAGATGCCTGCATCAGAGAGCTAGTCCTACAGCGC
GAGGGGCTCGGATTCTTCGCCGACGATACCATCGACGCTGACGCCTCTGACCGAGATCTG
CGCCCGGCTGCCGCAGAACTGCACTTCGCGTGCCAACTCGACCCCGAAGTAGCCCTCCTT
GGTATGGTCCTTGACCTCCTTGACCTGTTCGGCGCCACTGCCGTCGACGGTGCGGACCAC
AATCTGATAGCGGTGCGCCCACGCTGACCCGCAGAAGGAGATGGCCCGCCCACCCTGATG
CTGCGACGCAATCCATGGCCGTCCCGGTCGAGCTGGAACCGGATAAGATCCGGGGGCCTT
CATGCCACTGATCTTGAACGAGGCGTCCCGGATCGCGGCGACAATGGGCGCTTCACGGCC
GTCAAACTCGGGATGAGGCGAGTCTTTCCAGCCCGGGATGTGGTAAGAATAGATGCCGTT
GCCTTCTCCGTGTGTTTTGAATCCACCTTGAGAGGAGTGCGGCCGGAGACTCCAGACGAG
CGATCCGGCGCCTCCAGCCTTGTCGACGGCGTGCAGGAACGCGGCGTAGTCATCTGGGCG
ATCAAAGAAGCCAAATTCGCCGGCGATGAAGGCTTTGCCGTGCTTCTTGGCGACGCGGCA
GTCTTTCTCGACGCGGCGAATGTCCCCGCTGCCATAGTAGTGGTACGAAACGATATCGAC
ATCGTCGCTTGCAAGGACTTCTTTCGGGTAGCATGCATCCACATCATCGTTACGGGCGAA
CGAGCCATCCATGACGAGGGTCCGAGGCGCGCGCGACTTGAGGTGTTTCGCAACGATCAA
GGTCCAAGAAGCAGGCGCAGGTCGCATCCCTCGGTGGTTCATCTCGTTACCGGTCTCCCA
GGCGAGGATCGTCGGGTCGTCGCCGTAACGGCAACCGTTGATCGAGTTGACGCGGTTCAA
GAGGAAGTCGAGGATGAGTTTGAAGCTCTCGATCATCGTGTGGTCTGTCCACCAATCGAT
CTGTCGCGCCTCGGCATTGCTACCGAGTCCGTAGCGGAACCGGATCAGGTCCACTGTCGA
GCCGACCCAATTCGTGTCGTCGCCGGTGTCCTGATTGATGATGGGGATGATGAGCTTGAC
TCCGGCTTTGCGAGCCTCGTCGAGCACCAAGTCCATCTCCTTCATCCGGTCTTCGTCCCA
CATCCAGTCGTTCCATTCGCTATGCCAGCCGTTGATGTGACCGCGACCAATGTTCGGAGA
CTTAATCCTCAAGGTGTAGGTACGGGTGACGGCGGTTCCGAAGGCATTCTCGGCCGCGAG
GCTGGCAAAGGTGTCCCTGACTTCGAATGGACCGTTCACGTCCCCATCGAGCAGTTCCGG
AGCGTTCAAGCTGGCAAAGCGGAAGCGGTTCCCGGCGAGAATCAGTTCGCTGCCTCGCCG
CTCGACAAATTGATCGGCTCGAGACAAGTGCGCGGGAGCGAGGGCGAATGTTTGTTGATT
CCCCGATGACGCAGCCATCATGTTGCGCTTCGGAGGAGGAGCAGGAGCAGGAGCCGAGTC
GGTTTCAGCCGGATGCGCAGACTTGGAAGAGCACGCTCCCATCGAGCTCTT
>MATOU-v1_14677934
CTATAAGGTACAAGTTTACTTCAAGACTACTACTACTACTAGTATTTACTCAAAATGTCT
TCTGATTCAAAAGCTCCAGCTCAACCACAAGGTGATCTCGGTTTAATCGGTTTGGCCGTT
ATGGGTCAAAACTTGATCCTTAACGCTGCTGATCACGGATACACTGTTGTTGCTTACAAC
AGAACTGTTTCCAAAGTTGACCACTTTTTGGAAAACGAAGCCAAGGGTAACAAGCACATC
ATTGGTGCTCACTCTATTCAAGAATTGGTAGACAACTTGAAGAGACCAAGAAGAATTATG
TTGTTGGTTAAGGCTGGTCCAGCTGTTGATGCCTTCATCGAACAATTGTTGCCATACTTG
GAGATGCCTTCATCGAACAATTGTTGCCATACTTGGACAAAGGTGATATCATCATTGATG
GTGGTAACTCACATTTCCCAGACAGTAACAGAAGATTCGAAGAATTGAAACAAAAGGGAA
TTTTATTTGTTGGTTGTGGTGTTTCTGGTGGTGAAGAAGGTGCTAGACATGGTCCATCTT
TGATGCCAGGTGGTAACGAAGAAGCTTGGCCACACATTAAGCCAATTTTCCAAGCTATTG
CTGCCAAATCAGATGGTGAGCCATGTTGTGACTGGGTTGGTGATGCCGGTGCTGGTCATT
ACGTCAAGATGGTCCACAATGGTATTGAATATGGTGATATGCAATTGATTTGTGAAGCTT
ATGATGTTATGAAGAGAGTTGGTAAATTTGAAGACAAGGAAATTGCCGATGTTTTCGCTC
AATGGAACAATGGAGTTTTGGACTCATACTTGATTGAAATTACCAGAGACATTTTGAAAT
TTAATGATCCAACTGATGAAAAACCAGTTGTTGAAAAGATCTTGGACACGGCTGGTCAAA
AAGGTACTGGTAAATGGACCGCCATCAATGCTCTTGATTTGGGTGTTCCAGTCACTTTAA
TCGGTGAAGCTGTTTTCGCTAGATGTCTTTCTGCTTTGAAGAATGAAAGAGTTAAGGCTT
CAAAGATTTTGAAGGGACCAGAAGTTGGTGAAAAATCACCAATCACTGACAAGAAGAAGT
TTATCGATGATTTGGAACAAGCTTTATATGCTTCCAAGATCATCTCATATGCACAAGGTT
TCATGTTGATGAGACAGGCTTCAGTTGACTACAGCTGGAAGTTGAACTACAGTGTTATTG
CTTTGATGTGGAGAGGTGGATGTATCATTAGATCGGTTTTCTTGAAAGAAATCACTGCTG
CCTATAGAGAAAACCCAGACTTGGACAATTTGTTGTTTCATCCATTCTTTTTGGATGCTG
TCACTAAAGCCCAATCTGGTTGGAGATCAGCTCTTGGTCATGCCATTACTCAAGGTATCC
CAACACCAGCTTTCTCCACTGCTTTGGCTTTCTACGATGGTTTGAGATCAGAACAATTAC
CAGCTAACTTGTTGCAAGCTCAAAGAGATTACTTTGGTGCTCACACTTTCCAAGTTCAAA
AGGGTAAAGGAACCAGCTTTGTCCCAGAAGACAAGTGGGTACATGTTAACTGGACCGGAA
GAGGTGGTGATGTTTCTGCTTCAAACTATGATGTCTAAGAAGGAAAACAACATACAAAAC
TTTATATAGGTTTGTAAACTTTTGGATAAAATGATAAAGCGTTGT
>MATOU-v1_14682205
GAAGGAAGAAAATTAGCTACAACAATAAGACGAAGCTAAATCTTTACACTATTGCAAGTA
TCAGAAAAATTTCCTTCATTCAATTTGTTTCCCCCACTGTATTACAATTCTTCTTACTAG
CTACTACAACGCAATATAAGGCAATCTCACAGCTTTATAAACAACCACAACTACAACAAC
AATAGTCATCTTCATCATTTTTGCATTTTAAAAACCTACTAGTCATATTGCTACTATAAG
CTTACATCCAACTCTTTTCTCATACACACACTTTTACACATCTACAATCATGAGAAAGGA
ATTGAAATACATCATTTACGCACACATTGTTCTAGTAATATACCTCCTATATCTATCATT
TGACTTGCTTACACTATTGCACGATGATACATTTGCTGATGCATTGATTGATTATGAATT
GAATTCACAAAAATTGGATAAACCGGCATTAATACCGAAAATTATCCATCAAACTTATAA
AAATGAAAATATACCTGAGATTTGGAAACCAGGTCAACAAGCATGTATCGATTTACATGA
AGATTATCAATATATCTTGTGGACAGATGAAATGGCACGAGAGTTTATCAGTGAGGAATT
TCCTTGGTTTTTAGAAACTTGGGATAATTACCCATACAATATTCAAAGAGCTGATGCTAT
AAGATATTTTGCATTGTATCACTATGGTGGTATTTACATTGATTTAGATGATGGCTGTGA
ACGTCGTTTGGATCCGTTATTGACAGTACCTGCATTTGTTCGAAAAACGATACCTACTGG
TATTTCCAACGATGTCATGGGAAGTGTACCAAACCATCCTTTTTTCCTCAAGGCAATGGA
ATCATTGCATAAATATCAACGCAATTGGTTGGTACCTTATATCACCATTATGATTTCAAC
AGGACCATTATTTTTGTCAGTTGTTTGGAAACAGTATAAACGTTGGGGTATTCCAGAAGC
AGGAAAAGTACGTGTTTTGATGCCAGAAAATTACAAGGGGTATCAATATTCATTTTTCGC
CATTGCTCCTGGCTCATCATGGCACATGAGTGATGCTAACTTTATCAAGAGTTTGGCCAA
CCACTTGGTATTGGCAGTTATTGGTGGGTTTTGTATTGCTCTTGCCATTTTGGCAGTGGA
ATACCTTTTCTACTCATTTATCATTTCCAGTTTCTTTAAGAAATGTACTGCCAAGGTGGG
CAATCTCATTTTGGGAGTAGTCACTGGAGTTTTACGCTTTTTCAATTTGGATAAAGTTGT
TGATTCTCATTTTAAAGGGTACAATTTCGTATCTAGTTCGCCCATTGGTAATGATGATGA
AGAATCTCAATTGGGTGAAGTTAAACCTAAAAAGGGAATCAGTTTGAAGAATTTTATTAA
AAACTCCAACATCAAACGTCGGTCAAGAAAAGATTCCAATATTCCTATTGAAATTGATAT
ACTAGAGAAATTGGCTGATGATCCAACGACAATTGTAATCACAAATGATCCAGCACAATC
ATCAACCATACCGAAAGGTGTGAATAATAGCAGATCCAACAACAGAACAACAACTTCCTC
CTCCTTAAGCAGATCCACTTCAAGCAAGGATAAATTGGAAGTTGTTGAAACTTTGAAAAA
GATCAATTCCTCCGATGAGAGTGAATTTGATAATGACGAAGATTCGAGTAATGATTCAAC
ATTTGTTAACGAGTTGGAGACTGATGCTGAGTATCTACAAGCATATTCCGATTTAAACAC
AGATGCTGAAGCTGATGTTGATACTGATGATTCTACTACTAATGATTACAAAACTGATGC
AAGAAAATCCCCCTCGCAAAGAGGCAAGAGTGACTCAATTAATGGTAATGACAAAGGTAG
TGACATGAAATATAATGATGATATTGTATAAAGTATGTAAA
>MATOU-v1_14683778
CTTCGGTATCATTACCGCTGTCGTTGTCATCGATTTATGGAAAAAACCGTCCAGACCTCC
GTGCAGCATGTTGAGTCCGGCTCTCAGACTCGACAAGATGGACTGCAGCCGGCCGCTGAC
GATGGCGGCACCGACAAACCGCCTATACCGAGCGCGGGCTCAACCGGCAAGAGCATCGTG
CTCTTGAAAGAAGACGATCCGGTTGGAGCTCGCTCCCAAAACAAACAGAAACATGAAGGC
AGTGCTTTCTCCGTTGGGGATGGCCACAATGTAGACAACGCTCCAGACTGGGCTCACACC
GTGCCATCTGAGCAAGTTGCACACCTGCTTGGTACGAACGTGCAAACAGGCCTGGCCACG
AGCGAGGCCGCAGTCCGTCGGGAGAAGCATGGTCGCAACAAGCTTGAATCATCTGGAGGC
GTTACCTGGTGGAACATCCTCGTCCGTCAGGTCTCCAACAGCCTTACCCTCGTCCTGGTA
ATTGCTATGGTTCTGAGTTACGCCACTCTCGACTTCATCGAAGGAGGTGTCATCAATGCT
GTCATCATCCTGAACATTGTTGTCGGGTTCTTCCAAGATTACCGTGCCGAGCAGACGATT
CAGTCGCTTCAAGCGATGGCTGCGCCTGTCTCCAAGGTCGTGCGCGATGGTACACTCTCC
ACAATCAAGGCAGATGATTTGGTTCCCGGTGATGTCGTCCACTTATCCGTTGGTGACATC
GTGTCGGCCGATCTCCGCCTCGCCACCAGTACCAACCTCGCCACGGATGAAGCACTTCTC
ACGGGAGAGTCGAAGCCTTGCAGTAAGAGTGCCGACTCCATCGTAAACGAATCTTCGGCA
CCACTTGGCGACCGACACAACATCGCTTACTCTTCTACCACCGTCACAAGAGGCAGAGGA
ACTGGAGTAGTGGTTGCCACAGGAATGGGCACAGAAATTGGCAAGATTGCCTTCTTGCTC
CGTGACAAGAAGCAGACTACGCAAGGCAACTGGCTTGTCCGAGCCTACAAAGGAATCTTG
TATGCCGTCAAAAACGCCCTGGGTCTGGTCGGAACGCCACTACAAGTCAAGCTCTCCTAT
TTTGGTCTACTGCTATTCGCACTTGCCATCTTGCTCGCCATCATCGTCTTCTCAACAGCT
GTGTGGGATATTGACGGCGAGACCCTCATCTATGGAATCTGTGTGGCCGTCGCTGTCATC
CCCGAATCTCTCATTGCCGTCCTTACTATCACAATGGCTGTTGGTTCTAAAGCCATGGCG
AAGGGCAACGTTATCGTCCGCAAGATGGGCGCTCTAGAAGCCATCGGTGGCGTCACAAAC
ATCTGTTCGGACAAGACTGGCACGCAGGGCAAGATGCTGGCCCGCATGGCCTATCTGGCC
GATGGAAGGACCTTGGCCGTTCAAAACGAAACCAGTCCTTTCGATCCTACCTCTGGCTAC
GTCAGTATGAATGGAAACAGACTGGCTGAGAGCAACATCCATGAAGACGCAGCACTACAA
GACTTCTTCCAGACAATATCAGTCTGCAATCTTGCTTCGGTGATTCCGCCAAAGGATGAA
GATGGAACATCAGGCCTGTGGTCTGCTACTGGTGAGCCAACCGAGATTGCTCTCCAAGTC
ATGGCCATGCGTGTTGGTCACAGTAAGGAAGATGTCCTGTCCAAGCAGGGCCTTCGCCTC
GCTGCTGAGCATTCATTCGACTCTTCTGTAAAGCGTATGACTGTCGTCTACGAAGGATCG
GACCCTACGCAAGTCCTTTCGTGCTTCACCAAAGGCGCCACAGAAGTCATTTTGCCTCTC
GTCGAAGGGATGAACAATCCCACCAAAAAGGCCATCAACGCCCAGGCAGATGCGATGGCC
ACGCAAGGATTGCGTGTGCTCTGTCTCGCACGCCGGTCTCTCGCAGCATCCGACCGTGAC
TCTCTGCAAAGCCGCAGTTTCGTCGAACACAAGCTCACATTCGTTGGGCTTGTTGGTCTC
TACGATCCGCCGCGCCTCGAGTCTGCAAGCGCTATCAGGCAATGCCAGGCGGCCGGAATT
ACTGTCCACATGTTGACAGGCGATCACCTCAAAACAGCAACCACGATCGCTCAAGAAATT
GGAATTCTTGGTCCACAGGTTCCCGGCTCACACTTGCCATCGGCCGTAATGACCGCGCCT
GATTTTGATGCAATGACCGACGAAGAGCTTGATCGGCTTGAGACACTGCCATTCGTCGTC
GCTCGCTGCAGCCCTACCACCAAGCTTCGCATGTTGGACACTCTCCATCGCAGAGGCAAA
TACTGTGTAATGACAGGCGACGGTGTCAACGACTCGCCAGCACTGAAAGGTGCAGACGTC
GGCGTCGCCATGGGTCTCAACGGAAGCGATGTCAGCAAGGAAGCAGCAGATATGGTCCTC
ACAGACGACAACTTCGCATCGATCGTCTCGGCCATTCGCGAAGGCCGCAGACTCTTCGAC
AACATCCAAAAGTTCCTCCTCCACCTCCTAATCTCCAACATCGCCCAAGTAGTCCTCCTC
CTCATCGGCCTCGCCTTCCAAGACCGCAACGGCGTATCGGCCTTCCCGCTCTCCCCTCTA
GAAATCCTCTTCGCAAACCTCATAACCTCCTCCTTCCTCGCCATCGGCCTGGGCCTGGAA
TCCGCCTCCTCGGACGTCATGACGCGCCCGCCCCACAGCCTGCGAGCCGGCGTCTTCACA
AAGGAGCTAATAATCGACAAGTTCATCTACGGCACGTGTATGGGCTCGCTGTGCCTGGCC
AGCTTCGTCATCGTCGTCTACGCCCACGGCGACGGCGACCTCGGCACCGACTGCAACCAC
AGCTACAACGAGACTTGCGGCCTGCCATTCCGCGCCCGCGCCACGGCTTACAGCATTTTG
ACCGCTCTGCTGAGCATCATGGCATGGGAGGCGAAGCACCTGACCCGCAGCTTGTTCAAC
ATGTACCCGGAGGAAGACGACAGCACTTTCTCGGTTTTTAATACTCTGCTGAAGAACCGT
TTCCTCTTCTGGGCTGTCTGCGCGGGTCTGTGCACTCCTTTTCCTATCGTCTACATTCCT
GTCATCAACCGTGTTGTTTTCAGGCACGCCCCGCTCAGTTGGGAGTGGGGTCTTGTTCTA
GGCAGCATCGTCTGCTTTGTCGGCCTCGTCGAGAGCTGGAAAGCTGTCAAACGCCGCTCG
CTTAGGAAACGTGCGGCGTCGGCGGCGGAGGGAGCGGCGAGTCCGCGAGGCGACGACAAG
AGCTCGCTGGCTTAGTTCCCATGTGTCTCTTTCTTGCAGCTGATCGCGTTCAGATCATCC
TAGGGATGAATCCGAGTGCGATGCTTCATGTATGGGGACGGAAGGGTCACTCAACTTGAC
CGAATACGAAGCGAAAGAACTTCAACAGCAACGACTTCGACGATGACGATTGAAACGACT
GCAAGCAGGGAGGGACCATTCAACACGCCCCTAAGCCTATCTTCCTGACGCTCCTCTTCA
ACAAGAGCGTCGttctctcttttatctctcttctctttctttctcaatctcAGAAGAGCT
GGCATGTATCTAAGGAACATAGTCAGACAAATCGttcattcattcattcattcattTACT
CGTTTGACTCATTCATCAAATCAGTCGACCATTATCCATCA
>MATOU-v1_14697345
GTATGCGCAATAATATCAGTTTATTCACGAAACTAATCTATTTTTGGAACTACTCTTGCA
CCTTGAAAAAACACTCTAGCGGCGGACCCGTAACCCATAAGACACTTTTGTGGGTTTCCT
TGGCCATCTTTATCTTCACCTTTCAAACCCCATCCTTTTCCATTTCCAAACCAGTCGTGG
TATTTTGCATCATAAACTTCCTTGTATGTGTTGTGAGGCTCAAAACTTTGCAAGTACATT
CCATCTTTTGGATCTTTGATAAACTCGTAAAACATAATTAAGTGTCTCTTGACCTCATCG
TGGATTTGTTGAGCCAAACCTTCGGGAACATCATCTGGATCAACGTACAACAAGTAGTCA
GCGAGACCTTCAATCAACAATTGCACAAAGTATGACGAGTCACGCCAGTATCTCTTATCA
TCTGGGAAATCACGATCGTAAAAGAACGAGTTGTGATGGATTCCTGCTTTGGCCAAATCG
GTGGCGATTTGTAACCACTTCTTATCCTTTGTGATGTGGTACAATTCGGCTGCTGCTGAT
AAAGTAGTTCCAGTGTTGTAACTCCACTTTACATTGTCAACCTTGTCACTATCCTCACCG
ACACCATCTCTAATGAGTTTATCCAGAGGATCTTGCAACACTTTGATTTGCCAGTCTATA
CACTTCGCTGCAAAATCAACATAAACTTGACTTTCTTTTGGCAAAAATTTCGAGATTTGC
AAGCATGCTTTAGCAACTTCGGCAGTAGTACAGGCATTCAATAGCTTTTTGGAGATATGC
CAGTGCACACCACCTTTTGTGACTGCATTAGGATTATCGTTCCATCCTCCCATCAAGAAC
CGAACCAATTCTCTCCCTTGGTCCAAGTATCGTTTATCACCAGTCACCTCGTACGCAGTG
ATGATTGCACTTGCCACTTGGGCATCGTCGTCGTAGTAGATGTCTTTGTCACCACCTTCG
GCAGCAGAGTATCCCTTAAGACTGTTGTTTTTGTATTTTTGAAACATGGCAACTGCTGGA
CCTACTAATGGTTTGAATTCGTCTGGGTAAATTCGTGCAGCATCAACCACTGCTTGTACA
CCAACGGAAATGGCCCAAACAACAAATTTGGAGTCATTGTAACAGCCACTGCATTTCTTT
TTGGCAACAAATGTCTTTTCATGTGAATTGTAGTATTCCAACCACATAGCTCTGGTGATA
TAATACCCTTCCAAATTTGGGTTTTCAAGTTTTGGGAATGCAGACATAGTGGGAAGAAAT
CTAGCAAAACAATTGGTGTACGGGTTCTAAGAAAATGGACTTTT
>MATOU-v1_14702206
TCCTGCTATTCTTCGATATTTCAGTACAAGTTGGGGAGCTATGGGAGGCGGGAGCAGGCT
AAGTAACACTAAAAATGGAAGGAGGGGGTGAGTGGAGTGTAAGAAGGAGAGGGTGGGAAG
AATCGCGCGCGAGAGCGAAGAAGTCTAGCAAAGCAGAGGGGAGGGGGAGCTGCGGGGACG
AGGTGGAGCGCTTTTGAAAAGGAAGAGAAGAAGGACGACATGCTGATGCGAGCGGAGAGA
GTgggggggTGATAACGAATGCGATCAAGAGAGACACAAGAAAGGAGAAGAGAGCGACGA
CGAAAAGTGGGTATCAATCAACGCGAAAAACGCGAAAGACTGGTTTACTTCGACTCCTCC
TCCTTGGGCGGCTCCGACGAGGACGACGAGTCCTTGTTGCGCTGCTCGTAGACCTTCTGG
AAGAGCTTGAGCGAAGCCTGCTGGGTCTCGGAGACCTTGGCCTTGATGTCGTCCGGCTTG
ACGTCCGAACCCTCAGCCTGGGCCTTGACGTTGAGCTCGCGGAGCTCAGTGATGAGGCCC
TGGACCTTCTTGGCCTCCTCGGCGTCGACCTGCTCCTTGAACTCGTTGAGGGCCTTCTCC
GTCTCGGCGGCGACCGAGTCGGCCGAGTTGGCAGCCTCGATGAGGTCGCGGCGGGCCTTG
TCGGCCTCGGCGTGAGCCTCGGCCTGGGCAATCATCGACTCGATCTCCTTGTCCGAGAGA
CCCGACGAGGCAGCAATGGTGATCGACTGGTCCTTGTTGGTGGCCTTGTCCTTGGCCGAG
ACGTTGACGATACCGTCGGCGTCAATGTCGAACGTGACCTCGATCTGGGGGATACCCTTG
GGCGCGGGCGGGATTCCGACGAGCTGGAAGTTGCCGAGCATCTTGTTGTCGCGGACAAGC
TCACGCTCGCCCTGGAACACCTTGATCTCGACGGCGGTCTGGCCGTCAGCGGCAGTCGAG
AAGGTCTGCGACTTCTTGGTCGGGATGGTCGTGTTGCGGTTGATCAGGCGAGTGAAGACA
CCGCCGAGGGTCTCGATACCGAGCGAGAGCGGGGTAACGTCGAGGAGGAGAACGTCGGTA
ACCGAACCGGCGAGGACACCACCCTGGATCGCGGCACCGACGGCGACGGCCTCGTCCGGG
TTGACACCCTTGGACGGCTCGCGGCCGAAGACCGACTTGACGGTCTCGATGACCTTGGGC
ATACGCGACATGCCACCGACGAGGATGACCTCCTCGACCTCGGAGGCCTTCATGCCGGCG
TCGGCGAGCGCCTTCTTGCACGGCTCGACCGTCTTCTCGATCAAGGGGCCGACGAGCTGC
TCGAGCTGCGAACGGGTGAACTTGAGGTTGATGTGCTTCGGGCCCGAGGCGTCGGCAGTG
ATGTACGGCAGGTTGATGTCGGTCTGGGCGGTGGACGACAGCTCAATCTTGGCCTTCTCG
GCAGCCTCACGGATACGCTGGATCGCCATGCGGTCCTTGGAAAGGTCGATCGACGACTCC
TTCTTGAACTCGCCGACAATGTAGTTGACGAGCGCAATGTCAAAGTCCTCACCACCGAGG
TGGGTGTTGCCGTTGGTCGACTTGACCTCGAAGACACCCTTCTGCATCTCGAGGATCGAG
ACATCGAACGTGCCACCACCCAAGTCGTAGACGGCGACCTGGCGCGAGTCGTTGCGGTCG
AGGCCGTAAGCGAGAGCGGCGGCAGTCGGCTCGTTGATGACACGGAGAACGTCAAGGCCG
GCGATCGTACCGGCGTCCTTGGTCGCCTGACGCTGCGAGTCGTTGAAGTAAGCGGGAACG
GTGATGACGGCGTGCTTGATCGGCTTGCCGAGGAAGCCCTCGGCGGTCTCCTTCAGCTTG
CCGACGACGAAAGCACCGATCTGGGCGGGCGAGTACTTCTGGCCGCGAGCCTCGAGCCAT
GCGTCGCCGTTCGAGTGCTTGACAATCTTGAACGGAACGTTGTGCAGGTCCTTCTGGACC
TCGGCGTCGGTGAACTTGCGACCGATCAGACGCTTGGTCGCGAAGAAGGTGTTCTCAAAG
TTGACGACGGCCTGACGCTTGGCGGGGAGACCGACGAGGCGCTCACCGTCCTTGGTGAAG
GCGACGACCGAGGGCGTTGTCCGTCCACCCTCCGAGTTCTCGAGGACACGGGCCGAGTTC
TCGAGGACACGGGGCACCTTTCCCTCCATGAGCGCGACACACGAGTTGGTGGTTCCCAAG
TCCATTCCGACGACGGGACCCGAGACCTTGCCCGAGTTGAACCGCTGCTGCATGAGCGAG
CCGGCGCGCGGCTGGCGGACGGCGCGGAGGCCAGAGAGACGAGCTGCAGACAGCATGGCT
ATGAGGTGCTGGAGACTGGGCACGGGATGTAC
>MATOU-v1_14702602
CACGGCCGAGCCGGTCCCCGAGGAGGAGAAGCCCGTTGGCGCGCGCTGCTCGCACTGCGC
TCGCGCTCGCCGTCGCCGGCACCGCCATCTCGGCCGTCAACGGCGCCATGTACGAGCCGC
CAGAGGGACAGGTCATGCTCGGGTTCTGGTTTGACCCGGCAAACCCCTACAACGACCGAC
CGTCAATTATCAACGAGAAGCTCGGTAACAACGTTCCCGTGTTCCAGATCGCCCAGCCTA
TCCCTCTTCCGCCCTACAACTGGACAACCGGTGTTGGCGGTCCCGCACCGGAGAACACCA
TCGAGCAATCCGGCACAGACGCCGCCGTCTTCCTCACCATCTACCCGACAGAAGGCTTTG
CCGCAGTCACAGATGAGGACTTTATCGCGCTCGGCAAGCAGATCCTGGATTACCAGACTA
CCCTCAACCGAACGACCTTCCTCCGATACGCCCCTGAAATGCAAGGAACGTGGATGAGAT
ACGGACAGCAGCCGACGGCGTTCCTGCAATCGTGGCAGAACATGTATACCCTCGTCAAGT
CGGTCGCACCCGAGACGGTCATCGTCTGGGCACCCAACACGCCGCAAGGCTACCCGTACG
GCCAGACCGGCACGGCGTTCACCTCGCTTAGCTCGGTCGACCAGGCCTTGCTCGACACGA
ACCAGAACGGAGTCCTCGACGCCGGAGACGACTCGCTCGCGCCGTACTACCCCGGCGACG
ACCTTGTCGACTGGATCGGTCTCTCGATCTATTACAAGGGTATCCCGTCCGATACTATGA
ACTCCATCCAGCCGAACAACTACTGCTCGGACGTTATCACGGGTACCGACCCTGGGACTG
GCAACGCGATCACCGAGTGGTACCAGACGTACTGCGCCAACAAGCCTTCGAAAGCGTGCA
TGTTCGCCGAGTGCGGTGCCGCGTTCCACGTCAACGACGCCGGAGTCTCGGCTGCTGCTC
TTCAGCAGGCTTGGCTCACGGACTGCATCACGAGCCAGAACATGCTCACGCGGTTCCCGC
GTATCAAGCTGTACAACCAGTTCGAGTACGAGAAGACCGAGACGGCCAACGACGGCTCGG
ACGACCTCCGTGACTACCGAGTCCTGAACAACACGGCCGTCCTCGACGAGCTCAAGGCCG
ACTTGAACTCGCTCAGCGGCTCGTTCTACTGGGCCGCCTCGCGCGCCCCGCCGACGTCGA
TCTCCTCGGCCGGCGCTCCCGCCGCCACCAACTCGGCAGGTTCGACCGTCAAGCAGGCCA
TCACGGCGACGACTCGTCCCCGCCCGACGACCTTCCCGAGCCTGTTCGGCACCACCAGCG
ACGGTACTCAGCGCGCCGAGTGGGCCGAACTCGGCATCATGGTCGCCGCCGGCGTCGTCG
GAGCGTACTCGGTCATGCGGACTCTCTAAAGCGCAGCGCATCCACCGGTTCGACCCTAGC
GGTTCTGCTGCGACTTTCATCCTCTTCTTGTACAGTTTGACGTCTAGACTGGGAGGCGAG
GCGACGGCGACGCGAGTCATCTCTTCAAGCGCCTCGACGGATCGACCGATCTCTCGC
>MATOU-v1_14704645
GCGAGGAGAGCGCTCTCTTCTCTCTCACTCTAGACACAAACGTCAAAAGGACACGCTGGC
CCACCGAGCGTACTACACTCGAATCGCAGCTACCACTCGCACCTTCTTCTTGTCCCGCCC
GACGACCAGACCAGCCGCAGCCACAGCCGCCGCGTTTGCTGCCACCGCCGCCGCTACTCT
CACTGCCACTCGCACCCTCTACGCATCCCCGTTCGCCATGGCCCCAATCGAAGTCAACGG
AGGCGCCGCCGCTGAAAAGCCCTCCAAGCACAACAAGGTCGTCATCATCGGGTCCGGTCC
CGCAGGCCACACGGCCGCGATCTACGCCGCCCGCGCCAACTTGAACCCCGTCATGTTTGA
GGGCATGCTCGCCAACGGGTTCGCCGCCGGTGGTCAACTCACCACCACCACCGACGTCGA
GAACTTCCCCGGTTTCCCGGAAGGGATCCGCGGCCCGGAGATGATGGACCTCTTCCGCGC
TCAGTCGGTCCGGTTCGGCACGACCATCCACACCGAGACCATCTCCAAGGTCGACTTGTC
CGAACGGCCGTTCAAGTACTGGCGCGAGGGGGAGGAGCAGAACGAACCCGAGACGGCCGA
GACGTTGATCATTGCGACGGGCGCGAGTGCCAAGAGGATGCACATCCCGGGAGAGGAGAC
GTACTGGCAGAGTGGAATCTCGGCCTGCGCGGTCTGCGACGGCGCCGTCCCCATTTTCAG
GAAGAAGCCCCTCGCCGTCGTCGGCGGTGGCGACTCGGCCTGCGAAGAGGCCATGTACCT
CACCAAGTACGCCTCGCACGTGTACATGCTCGTCCGCCGCGACGTCCTCCGCGCCTCGAA
AGTCATGGCCAAGCGCGCCCTCTCTCACCCGAAAATCACCGTCCTCTGGAACACCACCCC
GATCGAAGCCAAGGGCGACGGCGAGTTGTTGACCGCCCTCCGCTTGAAGGACACCAAGAC
GGGCGAGGAACGCGACCTCGAAGTGAACGGCTTGTTCTACGCGATCGGTCACGTCCCCGC
GACGGAATTGGTCAAGGGTCAACTCGAGTTGGATGAGGATGGTTACATCAAGACCAAGCC
GGGTACTCCCGAGACGAGTGTCGACGGTGTCTTTGCGGCTGGAGACGTTCAGGATAAGAT
TTGGAGGCAAGCAATCACGTCAGCGGGTACAGGATGCCAGGCCGCACTAGCCGCAGAGCG
TTTCCTCGCCGAGCACGAATGCGTTAGCTCGGAGGACGTGTCTCCCCCGGTCGGCAACGG
GCAGTAATCGCAATAAACGAGTTTTTCC
>MATOU-v1_14756913
TTGCATTGTAAAACTCCTTCAAACCTTCATCGTAACCTTGTTCCCATTCCCAGATGTTCT
TTTGAGAACCTTTCTTATTAGCAAGAGCTTCAAGTAATCTTGATCTCTTAAGAGCTTCCT
TTCTTCCGATTCTGGAGGCATTAAACTTTGCAAAAGAGTCGGCATCTTTCCAAGCAGTGC
TGAAACCATCCTTAAATAAGTCTGGTTCGTACTTTCCTTTTGGATCTTGGTCTTTCCAGT
AGTTGGCATGGTTATTGGTAGCATTGTCTACTGCTTGCTTGAATTGATCATCAGAAGGTG
GGTTTGATGGTTTTGGGAACGGTTTGAGTGCTCCTTTGTCAGTCATAGTTTTGAAATCCC
ACTCGCCACCATTTCCCGATTGAAACTTGAATGTCCAAAAATAAGACCCACTAGCTCTTT
TCTCAATGGCTTGAAGTTCATGCTGTCCGTATTTCACAACCAAGTCATCTCTATTGCCCT
TTGTGTGATCCCACGTTTGTTGGTCCAACACACAGGACCATTCTCCAACAATGAAGTCAA
CACCTTTCCCATTGTCATTCAAATTGGTTAACACGTCCCCATTCAAGTCATCAATAATTT
GTTCAGCAGACttttttttATCGGAGTCTGAAAAGCAACGATACACGTGTTCATCAACGA
CGACACCAATATATCCATCGTCTCCTTGTTCTTGTTGGACCCATTTGACCCATTGGTCAG
GCCACCAACCATCTGAAATAACAACTGGAACCAGCTTATCACTCTTTCTTATTTCGGTAA
TTGCAGCTGCGTAATATGTAGTTTGCTTCTTTGGCGGGTCAGCAAAATTTGCCTCATTCA
CTACTTGAATACCGGCAATGTTTTCATAATTCTTCAAGTCATTGGCAACCCATCCCAGTA
ATTTAGCCATCTCCAACTGAGCTTTATCATCTTTCCAAAATCCACCATTGCAGCCACTTT
CGCCAGAGTGACCTGAGTCGTTTGCTCCTCCAGGTAAACCATGAATGTCAACCAAGACTG
AAATTTGGTGTTTCAAAGCAGGCTCAATATACTTTTTCTTGATAATTGACCAGGCGTTGG
CATAAACAGCCTTGTATTTTTCAAACTTGAACCCAGAGGTAAAGTTTCCACCATCAACAT
CCCAATATCCAATTGGTAATCTAATTGAGTTGACTTGATGATCCGCCAACCACTTCCAAT
CATCATCAGTGACATAACTGTTCCAGTGATTTTCGAATTTGGCCCTGGTATCATCAACAC
CATGCTTGTCAACCAATGATGAGACAGCATCCAATTCGGAGTCGCCTTTAGTTTCACCAA
ATAAATCACCAAAAATCCATTTTTCTAAAACAAAACTGGATCCAAAGTTGACACCATAGT
TTAACCTAGATTGAT
>MATOU-v1_14757004
CAACCGCGCGCGCTGCGACGTCCGCCACGGCGTGAGCTTCTCCCACAGGGGGCCCGAAGT
CTGACCTCGCCACTGCAGCGAAGTGAACGGACGCTCCTCCCAAGTCGGGTCGTGCTTGGC
CTCGAGCTCCAGCTGTTCGACGATGAGGGCGTGGATGTCGCCAAACGTCGACTGCACGCC
GGGCGAGAAGAACGGCAAGACGGGAGTCGGGTGGTGCGAGAAGACCCAGGACGTCGTGCA
GTGCGTGTGGCGGTAGTGTGGTGCATAGCAGACATCCATGTAGCCCTTGAAGTCACCGAT
CAAGGAACCGATCGCGCCTTCCGGATGCGGCGGCATCTCGAATCCGGTCGCTTTCAAGTC
GGCGTGGTACCCGTACCCTTCGAAGCCGAGTTGTCGAGCAGGGCTGTCGGGCGGACAGAA
GATCGGGTATCCCCAATGAGGGAAAGGACCGCGCTCTTTGGGATCGAACGGCGGCTCCTC
GTCGTCGTCGTATTCTCCTCGCTTCGCCAATCCCTCGAGTCGACTGCGTTCTTCAGCTGC
GACGGCGATACGAGCGTTGTCGTGACCGTTGTAGACGATCTTCATGTCGGGCAAAAAGTG
CG
>MATOU-v1_14850055
ATTGTAGATGCTTGTGATTCGTGTTGATCGTATCTCATCAAAATGCTCTATGATGGCCTT
GCGATTTTGTGCAAAAGAAGAAGGGGGGAAACATTATGCGCGCTCGAAAAACAATGAACC
CTCGGCCAGATCCTCAACGGAGAAACCGGTCCAGACTTATCGCTAAACTGCTGGAGAGGA
TCATGGCCGGGATTATCGCCAGCGATAATAGAAGGCTGAGGGAGTGAGGTTGGGTTACAC
TTACACCACCTGTGGAGGTAGCCTGCGCAGCGCCTGCTGTGCTGGTCGCCGAGGTGATCG
ACGCTGGGGCGTCAGCCCATGGCATGGTGGTCGCTGAGTGGAAGACACTCGGTGAGCCAC
TGACCATGGAAGTCCAGGTTGTGGAAATGATGGCTTGGGATTCAAGCACAACCTTGCTGT
CGCCCGGAACACCACAAAGCGTGGAGCCTTCGAGGGCGCTCTTCTTAGCCATGACAACGG
GCTCGCCGTCGGTGACCCAAACGGTAAGGCAGCCGTTGTCTCCGACAGAAACGGACTTGC
AGGCGACTACATCAAGGAGCTCATCTCCTGCAGAGTAGCCGTGACCGTCACAGAGTTCGA
TGGAGTAATCGCTTGCATCCTGGCCCTTGTTGCTCAGGACTGTGATGACTTTGGGGTCCG
AATCGGCACCCTTCGCCCATGCAATTGTGTTGGCATCAATTCCAATGTCCTTGCTGAGTG
TCGTGAGGTAGTCGGGGTATTGGCGGCCCATGAAACGACGGAAGAGATTGAGATCGGCAA
GGAGCTTGTAGATGGATGCATCCGTCGAGAATCCATTCTCCCAAAGGGCCTGGCGGTTGA
AGTAGGGCTCGACGTTTCCGCCAAGGTGCTGCTCGATTCCGTAGTACACGACGGGAATGC
CATCTGCGGTGAGAAGGTAGGTCGCAACGTTGCGGGCGCGCGCGAGGTCGGCGGTGTGGT
TTCTGAAACGCGCAACATCGTGGTTCTCGCTAAAGGTGCCGAGAACTGTGGGATCCTTGC
ATGATTTCGCAATAGATGCGACCATATCAGCCAGGTTTTGCATGCTGCCCTCCTCGGCTT
GGAAGGCCTCGGTCAAAGGCCAGTAGAGAGGGTAGTTGAGAATGCTGCCGATGGTCTCCG
ACCACTCGCATGCAAGCGTCTCCTGCCTAGTGTAGACTTCTGAGGTTGCGAAAACACCGG
CGTCCTCCATGAAGCCCGTAAAAAAGTCGGCAGGCACGTTGATAGCAGCGTCGATACGGA
GTCCGTCAACGCTGTATTTCCACACCTGGTTCTTGATCCATAAACCGAGCATATCACGAA
CTTCCTGACTTTCCGTCTTCAAATCGGCCAGTGGTGCTTGCTCACTGCCTAGCCAGCAGT
TTTGCAAGTTGTCAATGTCGACATCGCTGTAGCCTGATGGGCAGTACGGGTGAAAGTATT
TCTCCTCGTTGAATGGGCGCATAAGAGAGTAATCGAAGGTGCCGTCGACATAGGCGGGGC
CGACCATGTGGTTTACGACAATGTCGAGCATGAAAAGCATGCCGCGCTTGTGAATTTCGT
CGATTAGGGTTGTCAGGTCTTCTTCGGAACCATATGATGGGTTGAGCTCGTAGAGATTTT
GTTGCCAGTATCCAGGGTATGCCTCGCCGTCGCCAGTCCAGTTGGGCATCTGTGCGACAA
TCGGGGAGATCCAGATCGCGTCGAAGTTCATGCCTTGAATGTAATCCAGCTTTTCGTAGA
TGCCGCGCCATGATCCGCCGCAGTGAATACCCATCGATGGATCGCATGGTTTGGGGTCTG
CTCCTTCTGCGACTGCGAAGCGGTCGGTCAAGACCTGGTAGATGGAGCGCGAGCGCCATC
CGTCTGCGTCGACGGCATGTACGGCAGAGGCCAACAATGAAACGAA
>MATOU-v1_14850923
ACCACAACACGACAAGACTATACGCTACGCAGTCTTTCATCCTTTGATCATTCACTTGAC
TTTACCTACATCGATGGGAGAAACTTATATCAATCCTCATGAAGTCCGCAACCAGGGCGA
CTCTGGCAACACTCTTGCCGATGGCAGCACCATTGCTACTCTTGACGGCTCCGTCGATGA
ACCGCCTATACGAAGCGCGGGCTCGTCCCATTATCTGACTGAAAAGTCAGGGGGCGAGAC
TCGCTGCATAGAAAAACTACCCACGATCGAAGTCAGAAATGACCCAGATCGAGATGATAT
CGCCGTTTGTGCTCACACTTTGACTGGTATCGAGGTTGCACAACGTCTTCAGACCGATGC
TGACAAAGGTCTCCTCGAAAACGATTGCGTTCTGCGTCGTGAGAAGCATGGTCGTAACAA
GCTCGAGAGCTCAGGAAGCGTGACCTGGTACAAGATCCTCCTTCGTCAGGTCTCCAACAG
CCTAACCCTCGTCCTGGCCATCGCAATGGCACTTTCGTACGGTACTGGAGACTTCATCGA
AGGCGGTGTCATCACTGCTGTCATCGTTCTGAACATCGTTGTCGGCTTCTTTCAGGACTA
TCGCGCAGAGCAAACCATCCAATCTCTTCGTGCCATGGCAGCACCTGCTTGTCGCGTGGT
CCGCGAGAATGGCACCATGTTGAGCATCAAAGCTGAAGACCTTGTCCCTGGAGATATCGT
GCAGCTTGCCACCGGAGATATTGTACCTGCCGACCTGAGACTTCATTCAAGCATCAATCT
GGCCACAGATGAGGCTCTGCTTACTGGCGAATCCAAACCTTGCACCAAGGACGCTCTCAA
ATGTCTATCTCATATCGAGTGTGCTCTGGGTGATCGTATCAACATGGCTTACTCTTCCAC
CACCGTTACACGAGGTAGAGCTCAGGGTATTGTCACCGCAACCGGTATGAACACCGAGAT
CGGCAAGATTGCCCAGCTTCTACGCGATAAGAAAGGTCACGAAGACAGTTCGACCTTCAT
CTCTCGTGCTGCACGACGTGTCCTCCATGGCATCAAGAGCGCGCTTGGGCTCATCGGAAC
TCCCCTCCAGGTCAAGCTTTCCTACTTTGCTCTACTCTTGTTCGCACTCGCCATTCTCTT
GGCAATCATCGTGTTCTCCACCAGTCTCTGGGATATTGACGGTGAAACTCTGATCTACGG
AATCTGTGTCGCTGTAGCCGTCATTCCAGAATCCCTCATTGCTGTCCTGACCATCACGAT
GGCTATCGGCTCCAAAGCCATGGCTGCTGGAAATGTCATTGTCCGCAAACAAGCTGCTCT
TGAGGCTGTCGGTGGTGTCACCAATGTCTGCAGTGACAAAACTGGTACTCTAACACAAGG
CAAGATGCTCGCCAGGAAAGCTCTCCTTCCAAGCGGAAAACATCTGACTGTCATCAACGA
GCTCAGTCCCTTCGACCCGACTCGTGGTGACGTCTTGGTCGACGATGTCCGTCTGGAAAC
AGCCTCGGTGCATGAAGTGGATGAGCTGCGTTACTTCTTCTCGACCATCGCATTATGCAA
TATGTCAAACGTCATCCCGCCCCAGAATGATCAAAGTCTCTGGTCTGCTACGGGTGAGCC
TACAGAGATCGCTCTGCACGTTCTGGCGCGCCGTGTCGACCAGGGTAAAGATGAAGTTCT
TTCTCGAACCGGCATGTCCTTGCTCACAGAGCACTCTTTCGACTCATCCGTCAAGCGCAT
GTCGGTCGTCTACAGCTACGCTGAACCAAGTCGCACGGTTGTCTCTTTCACTAAGGGTGC
TACTGAGGCACTCCTGCCACTTCTCAACATGGAAGACAATCAACGTCGTGAAATCCTACA
CCAGGTCGACACCATGGCCAGTGAAGGTTTGCGTGTTCTCTGTCTTGGTTACCGTCATCT
CAACGGAGGCGATCTAGGCTCAATCACTGACCGTGCCTTTATCGAGGCCGAGGGTTCTCT
TACTTTCGCTGGTCTCGTTGGTCTTTACGATCCCCCTCGCCTGGAATCTGCTGGCGCAAT
CAAGCAATGTCAAGCAGCTGGTATCGTTGTCCACATGCTTACCGGAGATCATCTCAAGAC
TGCGACCACGATCGCCAAGGAGATCGGTATTCTTGGGCCTGATGTCTATGGCTCAAACGC
TCAAACCGCTGTCATGACTGCGATGGACTTTGACAAGCTGACGGATGACGCCCTCGATGT
CATGGATCCATTGCCGTTTGTCCTTGCACGTTGCAGTCCCACAACCAAGCTTCGCATGTT
GGAAGCACTTCATCGTCGTGGACGCTACTGTGTCATGACGGGCGACGGTGTGAACGACTC
GCCTGCTCTCAAGGGAGCCGACGTTGGTGTTGCCATGGGCATGAACGGCAGCGACGTAAG
CAAAGAAGCTGCAGACATGGTTCTGACAGATGATAACTTCGCGTCGATTGTCTCTGCCAT
TCGGGAGGGTCGTCGTCTGTTCGACAACATTCAGAAATTCTTGCTTCATCTGTTGATCTC
GAACATCTCACAGGTAATTCTGCTACTCATCGGTCTCGCTTTCAAAGATCGTCACGATAT
ATCCGTCTTCCCGCTGTCGCCCATTGAAATTCTCTGGGCTAATCTTGTCACATCCTCCTT
CTTGGCCATCGGTCTGGGTATGGAGGAGGCATCCGCCGATGTTATGACCCGCGCTCCACA
CAGCCTGAAGGCCGGTGTGTTTACCAAGGAGCTCATCGTCGATAAATTCATCTATGGCAC
TTTCATGGGTGTACTATGTCTTGCTTCGTATGTTATCGTTGCATTCGGTGTTGGCAATGG
TGATCTGGGATATGACTGCAACGAATCCTACAACTCATCCTGCGACTTGCCCTACCGCGC
CCGCGGCACAGCATACAGTGTGCTTACAGTGCTGCTTTCCGTCATGGCCTGGGAAGCGAA
GCACCTCACTCTGGGTCTCTTCAACATGGATAAGTCGACCAGCTTCATCGGAAATCTGAT
GAAGAACCGCTTCTTGTTCTACTCCGTTTGTGTTGGCTTGTTGACGCCTATTCCCATCAT
ATACATCCCCGTGGTCAACAAACAGGTATTCAGACACACTGCTTTGACCTGGGAGTGGGG
TCTGGTGTATGGCAGTGTTGTCTTGTTTGTGTCACTTGTTGAGACATGGAAGGCCATCAA
GCGCCGCAAGGGATATGGAAAGAGGAGTTGGAACGAAAAGTACATCGAGAGAAGCGATGA
CAGCAGTGTTTTGACTGCTGTATAGGTGTGACAGTGTCTCGTCCGGGTTGGTGAGCGACC
TGGGATGGCCCGACTCTGTCGCTATTGGGCTTGAAGTTTTGTTTGTTTGTCTGTCTCTAC
CTGACTGTCTCACCAGATTGGAGTTTTCTTGTTTTGGTTTCTGTCGTCCTATTCCCAGCA
TATAAGATTCAACATCGCTGTGCCACCAACTCGCTAGTATTGTGTTTATTTGACCATATT
GATCAAATTCCGTGATGCGGTGCCGATCGTTGCTTCCTGTATTGATTGCGACCTAGCTAA
TAGGTAGGGGTACCTTTCGCAGTACCCAATCCAGGAGACCTTTCGTGAAAAGGTCTTTTG
GATTGGGTATTTAGGGTTTTAGGGGTTAGGGTTAGCAAAACTT
>MATOU-v1_14860220
ACATGGGGACTTGATTCGCGGTGGTTATAAGCTCTGGGTACAGGATAATAGCGCCGATAT
AAAAAGCAAACCATTTACCGGGGTTTTCGCATTCACTTGTTTTTCTGCTGCAGTCTATCG
CTTAAGTTGGTTTTTGGCCCGCACATCtttttttATAAACACCACTACAATCCACTCGTT
GTTTAATTTGAACCAAAAATGAAACTTTCAAACCTCGTCGGTCTTGCCTTGTCTGCTGTG
TCCTGTTTGGCCTTGGATCCAGTGGAAGTTAAAGGTAATGCTTTCTTTGTCAAAGATTCG
AGATTTTATATTAGGGGTCTTGATTACCAGCCCGGTGGATCTTCCACCTTGATCGATCCT
TTGGCCAACCCAGATACTTGTGAGCGTGATATCAAGTATTTCAAGGAATTGGGAATCAAT
ACCATCAGAATTTACTCCATCGACAACACTGCCGATCACGATGAATGTATGGAAAAGTTG
GCGGATGCTGGTATTTACGTTATTTTCGATGTCAACATTCCTAACGCTTCCATTGCCAGA
GACGACGCCAAGTGCTCGTACAACACCATGTACTTGAACGAAGTTCTTGCTACCGTGCTC
AAAATGGCCAAATACGACAACACTTTGGGTTACTTCGCTGCCAACGAAGTCATCAATGAC
GAGGACAGCACCAAGGCTGCCAGCTATGTCAAGGCGGTGGTCAGAGACATGAAGACATTT
ATCAAGAACAGAAAGATTAGAGCTATTCCAGTGGGTTACTCTGCTGCCGATGTTGCCGAG
AACAGATTGGAAACCGCCATGTACTTCAACTGTGGTGACGACGAAATGGCTCGTGTGGAT
ATGTTCGGTTTCAACGACTACTCGTGGTGTGGAAAATCCTCGTTCAAAACCTCCGGTTAT
GACGAAAAAGTGAAGGATTACTCCAATTATTCTGTGCCACTCTTCTTCTCTGAATACGGC
TGTAACAAGGTTACTCCAAGACCATTTACCGAAGTTGAATCTCTTTACTCCACTGATATG
ACCGGAGTCTTTTCTGGAGGATTGGTTTACGAGTACTCCGAAGAAGCTAACAAGTATGGT
TTAGTCAAGATCTCAAGTGACAACAAAACCGTTACTCCAAATGACGATTTCGACAACTTG
AAGTCCGAGTTTTCGAAGACTCTGAACCCAAGTGGTGATGGTTCGTTCCAAGAAGACTTA
CCCCACAACAACTGTCCACCCCAATCTGATAAGTGGGAGGCTTCCAACAAGATTCCAGAC
ACTCCAAAAGGTGCTTTGAAGTACATCAAGGGTGTTGAAGACCCTAAGGGTAACGGTTTT
GATGCTAGCACTCAATGGGCTTGTGTTGCAAAGGGTAATGACGATGATGACAGTGGAGAT
AAGAGCACTAGAACTGGAGCAGGTTCTTCTGCAACCAAAGCCTCCGGTTCTCAAAGCTCT
GGTGGATCTTCCAGCAGCTCGTCATCATCCAAAAAGGGTGATGCCGTTGTCGCTTCTGCT
TCTGGTGCTTTGATCTCCCTCGCCTTGGCTGTGGGTGCCTTCATCATTTAGTAGCAAAAC
TTAGAGAAATAATACGTGTACTTTCTAAA
>MATOU-v1_14860792
CCGCTATTCTTTCTCTCGTTGGCGGCGCCTCAGCTGTCCTGGCTGCTACCCGCGGTTTCA
ACTATGGATCTCAAGGCAACACTCTGGACACCTTTGAGGCTTCATTCCGCACCCAGCAAG
GTCTTGACACCACCAGTGGATGGAACTCTGCCCGTCTCTACACCATGATCCAGGACGGCA
CAGCCAACACTGTTATTAGTGCCATCCCCGCTGCCATTGCTACCAACACCACTCTTCTTC
TTGGTCTTTGGGCATCCGAGACTCAGGACGTTTTCGACAATGAGCTCACTGCTCTCAAGA
ATGCCATCAGCCAATATGGCTCTGAATTCGCCGATCTCGTTGTTGGTATCTCAGTTGGTA
GCGAAGACCTTTACCGCGAGACTCCCGCTGGTATTGCCTCCAACGCCGGTACTGGCCAGT
CCCCCTCAGTCCTTGTCGATTACATTGGTCAAGTCAGATCTGCCATCTCCGGCACTGTAC
TTAGCTCTAAGCCTGTAGGCCACGTCGACACCTGGACCGGATACACCAACTCCTCCAACT
CTGCCGTTCTTGCTGCCGTCGATTTCATTGGTCTCGATGAATACCCTTACTACGAGAACA
CCGCGTCGAACTCAGTCTCCAACGCCAACTCTTTGTTCTTTGACAAGTACAACGCCGTCG
AGGCTGTTGCTAACGGCAAGCCTATCTGGATCACCGAGACTGGCTGGCCCACTTCTGGTG
CTACTGAGAACTTGGCCGTTCCTAGCGTTGACAACGCCGAGACCTACTGGAAGTCTATTG
CTTGCGAGCTGCTCAGCCGCAACATCCCTACTTGGTGGTACATTCTCCAGGACTCTGCTT
CTCCCGACTTTGGTGTCCTCCAATCTGGCGAGACTCCCAAGTACGATCTCTCATGCCCCA
ACGTCGCCACCAGCAGCTCGGCCGCTCCCACCAGCTCGGTCGCTAGTGCCACTATGCCCA
CCTCTGCTGCTTCCAGCACCACTCTCTCGATCACCAACGCTGTTCCCACCGGTGGTGTAC
CCTCGTCGGTCGTCTCGAGCAAGCTCTCATCTGTTGCTTCCTCAGTCGCCTCGGTTGCCC
CTTCGGTCTCTTCCGCCGTCTCATCTGCATCCTCCGCTGCTAGCTCAGTGATTGCATCTC
TCCCCGTTGGCTCTGCTGGTAGCTCTGTTGCTAGCTCTGCCGGAAGCTCCGTTGCTAGCT
CTGCTGTTAGCTCTGCCCCCGGAACCACCCTCGTGCCCGTCACCACCAAGGCAGCTACCT
CCGTTGCTGACGACGGTGAGACTGTCACTATCTTCTCTACTACTTTGATCACTGTTACCC
ACTGTAGTTCTGCCTGCACTAGCACCGGCATGACCTCTGTCGTCTCTGCCAAGCCCAGCG
TTACCTCTGCCGCTGGCTCGACTGTTGTTCCCAGTGGTACTCCTGCTGCTTCCGGATGCC
CTGCCGACCTCAACGGTGCTTACCAGTACCCTCACTTGATCGTCCCTGTCGATGCCGCCA
ACCCTAACAAGGCCTACGGTACTCAGTACAACGGCACTATCAACTCCAAGGTTTCTACCA
TCTTCAACTTTGACATCCCTGCCTCCTATGCTGGCAAGACTTGTTCGACTGTCTTCCTCT
TCCCTCAGCTTGACCAGCTTGAGACTTCCAGCTACTCCTTCAACGACCAGGGTGGTTTCA
CCATTGCTGTCTTGAACGGTGTTGCTAACGAGTCGACCACCTACGCCAACGCTCCCGCTG
TCGCCAAGCAGATCGGCTCTGTCGATGCTCTAAAGCGTGGTTCTTCCCACACTCTCAGCC
AGGATGCCTGCCCTGCTGGCACTAGAGTCTCCTTCGAGGTCACCTCTACTGGCGGCCTTG
ATCTCGAGTTCTTCCAGGACTACAATCCTAGCCCGCTCGGCCTCTACGTTCGTGCCTGCT
AAGCGTATCGTCTCTGATACATACTAGATGGTTACTATTGTTGTTGGACACTTTTTCTAC
ACTTCAAGTCCAGCATAACGAAAGACAAAAAGCACGCACTTATAATGTAATCACTTCATT
GCCTAGCCTGTTTTAACGAAACATTTACCTTAGATGGATCAACTGTACAAATTATATTAC
CTCGAGAAGAGGCTTCACTTCCAAAAA
>MATOU-v1_14861829
TTTTTTAGCTGTGTATGCTTTATTCTCTCAATTGAGGTTAAGCTTTACATTAAAGTAGCG
TACGAACATGCAGAGTATCGTGAAAATATGTCAAAATCGGCTGAAGATTTTGGAAAATTT
TCAATATGTTACTATACCCTCAAGTGAATGGGCTTATCAACAATACTTGAGCACCCGAAT
GCCTTAAGCAAAGACTTCCAAGGATTTTTGTAGATACACCGGCATATGAAAAGGTCAAGG
TTGAAGCATTTGTGCTTCATTGTGAATCTTGTATTCATAGGCTCTTTCACTGCCTCGGGA
ATTTGTTGTTTTCTTCGTGCTCAGATGCAATATATCTCTTCGTGGTATTCCATTGCGATT
GTGCTTTCTCATAATCTTTCAACAGAAACGAGTTCAATGGGTGCAAATTAATCAAAATCA
TCGTCAACCTCGTGCAAATTTTTTGGTGGTTCCATATTCCAATGCTGCTTTTTTGCAGTC
AGTTCACAGTACTCTGCCACCTTGGATGTCGAGCATCTTCCCAAAAGAGCATTTTCCTTT
TTTCTTTCGTCAGTTTCAACATTACGGCCATTATTCAAGACGTTGAGAACATGCTTCATC
ATCCCATTGACATGAATTATTTTGTTCGTTCTGTCGGCTTCAGAGAACACTATCCCCATC
CGTTCTTCGTCTCCCACATCCCAGTACGATATACTGTTCGGTATCAATACACTCTTTCCA
TCATCGCAAATCGACTTCGAAGGATTCCATGGTTCTGTTCGTATGTTGAAGTCGACGAGA
GAACTGATATAGTCCATGGCATAGTCGTTTTCTCCCTTGGATATAATAAATAAGTGTGGT
CGGTATATCTCGCCAAGACACCCACACTGGGAAGAATGTGAACGTGCTATACCAAACCAG
TACATTCGATTTTGGAGAGATTCAGGTAAAACTTCTGAGGGAATAGGTACCAAGTTAGTT
CCACCTCTCAAAGAACCCACATGTTCTTTTGAATCTTCTCCGAACTCAGGGCCTGCTAGT
TTGTCGCATATCCCCTTATCAAGGCTGCATCCGATGATTCTCAATGGGTTAAAGTTGTAC
ACGAAAAACACCTTTTTGGGATCATTTTTGTCGAAAAAAGGTGCCCAGTTTTTCTCTCTG
AATTCTGGTGCTCTGTCTCGAAGCGAAAGTCGAACAGTTTTCCCATCACTTAATGGCCGA
CACATGTGCATTGCACGGAACCATTTAATCTTTGTGCTTCTCATGTTGAAAATAACTACC
GGTTCCTGTTGGAGTTCTCCATCTTTGTAAAACTCACGTACCGATACTCGAGGATCCTCG
GGACCCATAAGTGCAAGTCTATGCTTGGCGGTGTTGGGAGACTGGTCAATGTCAACCTTG
AGAATCGATGGGAACGCAGTATCTGAATCTCCAAGCTTGACATCAAACTGTTCAACCCAG
TTCTTGTCGAACACTTGCATGTATATCATGTTGATGGTGGGCTTGTTTCTGGTTCCTCGA
TGGGTATACAATACCCTACTGACCATGAAATGTACCTGGTACTTTTCAAGCCATACGCTG
CTTCCGCAAAAATGAAACCATTTATGAGCCAAGATGGATTTTTCGTCTTCTCCTTCCTTG
TCGAGAAAACAGTTTTCTGCGATGGGATAATCATCCTGAGCAATTCGAGAAAGTTCGTCT
CTGATTCTTTTCAACGAACTACTGAACGGTGTTGGTTCGGTCACAAACAACGTATCTGTG
AATTTGACCGAATCACACTGGAAATCTTTGATTTGTTTGGGAGAGTTGGCTTCTGCAAAC
GAGTATCCAGTAACATTGAAAGATGTCAATTTGGCATGAAGAACACTATAGTTTGCTATG
GTATCACTGGAATGAAAAGACTCGGAAAACCGGTACCAAAGTTGCAAATTAAGACAAACG
ATCAACGCTGCTATAACCACCGTCAACAATTGACTCTTGCTCTTCACAACCTGTTTTTCT
CGTGTGACCAAATGCCACACTCGAAAGTAGAAAAAGAAGAAAGCACTGCAGAGAGATAGC
AACACGAT
>MATOU-v1_14867147
GCTTATGATCGATATCCAAAGCAATATGCCACTTCAACACAATTATCGAGCTCGAGCTTA
CTTTATGATGATGACATGAACAATTCAATCTCGTCGCCATCGTATGATAATGATTTCTCC
CCTTTTGGTGGGTACCCAGCTAGTCAGTTCCCACTAAGTATTGATGAAAAAGAACCAGAT
GATTATTTGCACAATCCTGATCCAGTATTGGATGCTGATTATAATCGTAATCGATTCATT
TACGATTTGAAACATATGGATAGACGATCATTCAATGGGGCTCTTGCTTTAATAGTAATG
GTGTTGGCGGCAATCGGTGTGTTTATCATATTGCCAGTATTGACATTTACAAACTCCAAT
CCAAAAGTTCGTCCTCAAGTTTTTGAAGTATTGACGCATTATGAGTATCCAATGTTGAGT
GCTATACGTCAAGATCTCGTTGACCCAGACACCCCAGCAGAAGCTTTAACTAATGTGGGC
CAAGATGGTCGAACTTGGAAATTGGTATTTTCAGACGAATTCAATGCCGAAGGAAGAACT
TTTTACGATGGTGATGATCAATTCTTTACAGCACCTGATTTCCACTATGCTGCGACTCAA
GATCTCGAATGGTATGACCCAGACGCGGCAACCACCGCCAATGGAACTTTAGAATTAACT
ATGGATGCATTCAAGAATCATGAATTATTTTATCGTTCGGGAATGGTTCAATCTTGGAAC
AAAATGTGCTACACCCAGGGTAAATTGGAGTTTTCAGCCCTGTTACCTGGTTATGGAAAC
ATTTCTGGGCTATGGCCTGGGTTGTGGTCGATGGGGAATCTAGGACGGCCAGGTTATTTG
GCGACAACAGAAGGTGTGTGGCCATATACATACGATACTTGTGATGCAGGAATCACACCA
AACCAGTCTTCTCCTGATGGTATCTCATACCTTCCTGGACAACGATTGAACAAATGCACA
TGTCCTGGCGAGTCACACCCCAATCCCGGTGTTGGAAGGGGAGCACCTGAAATTGATGCG
TTGGAAGGTGAAATCCATGGTATAATTGGTCGTGTTTCTCAATCATTACAAATTGCTCCC
TATGATATCTGGTACATGCCTGACTACGATTTCATTGAGATTTATAATTCATCAGTAACA
TTGATGAATACGTATGCTGGTGGTCCTTTTCAACAGGCGGTGTCTGGAGTTACCATGTTG
AATACAACTTGGTATCAATTTGGTCAAGATTCGGGTAGATTTCAAAAGTTTGGTTATGAG
TATCTAAATGATGATGCAACTGGATACATCACTTGGTTTGTTGGTGATGATGCTACATTT
ACAATGAAGTCAACGTCACTACATCCTAATGGAAATGTTGGGTGGAGACAGATTCCAAAA
GAACCCATTAGCATCATTATGAATTTAGGTCTATCCAACTCGTGGGCATATATCGATTGG
CCAAGCTTGGTTTTTCCTAGTAAAATGAGAGTCGATTATGTACGAGTGTATCAGCCAGAA
GACGAGGTGAATATGGGATGTGATCCACCAGATTTCCCCACTTATGACTACATCCAACAA
CATTTGAACATTTATCAAGATATGAATCTCACAACGTTTGAAGATGGTGGCTATAAATTC
CCCAAGAATAAGTTGACAGGATGCTAAAAAATAAGTGTATATATATTATTAACCCTGGTA
TATAATT
>MATOU-v1_14868286
CGAGCCGCATTCAGCTATCTATCATCAGACTGCGGCTCAAAAGTGTCTTCACTGATAATT
CTCCCATTCAGCAGGCTTTGTCATCTTGTTAACTTCGTAGTATCTCTTGCCGCAAGAGTA
TCCTCTAAAAGTGAAATCCAGTTCAGGATCACAATTGCACTTGTGATCGTACCGATACTG
TGGGTTTAATGGGCATTGAGTGTACACACCATGATTATAGCCCATATCTTCAAAGTAGTG
TATTTTGTCTCTTGGAAGGAATAATGCCGCTGCAATTGAATGTATAGGTGCATCTCCCCA
TCTTTCGTAGAAAAATCCGCCTGTTTTATCGAGATAGTCAAAGTATGCACGATAAGCATC
GGATCTCCAAAAGTTTAAATCACCAATCTCAAAATTCGACCAGAAATGACACAAATTGTA
AGTTTCACCGCCATCGTTGGAGATAAAGTCCATCATGTTATTCTTTGCCAAATACTCTGG
ATGTTCCTTGATGAAATCTTTGGTATGTTGCCATAACGAAGGAATGGTTTTTTCAAACTC
GTGAAGAGAAATGGCAAATCCATACTTCTTGTCATTGTCGGCCATGAATTTGAACAAATC
GTAATCGAGATCACAATGAATCTGGATACCAGGCTCTACTCTCACTCTCCAGTACCAATC
GTACTCGTCGAGGAGCTCGTTTCGCCAAAAGAATCCAGATTCGAACCGGCACATGTGTCT
ATAAGATTCCATATCTCCATAAATGATATTAGCAGCCTTCATTTCCGCCCTACTTTTTGC
CGCCTTTTCGAGATCCACCCAATCGGGATAACTCCAGTGTTCTTTGGGGATCTTTCCGTA
CTTCGTTTTTCCCGAAACTATCGAGG
>MATOU-v1_14868924
CAACCACACCACCATCAGCAGTATCGATCTTAATCCCATAAAGAGCACGAGACAAGCCAT
CGACAACAAGGAGCGCGTACTCCTGCTCACTCCTCTCCGCGACGCCGCCCCCTACATCAA
CGACTACTTTGATCTGATCTCGCAGTTAACCTACCCCCACGAACTGATCGATCTCGCTTT
CCTGGTCGGCGACAGCACTGATGACACACTTGCCGTCCTTTCCAAGGAACTCGAGCGCAT
CCAGAATCGCCCCGACTCAATTCCCTTCCACAGCGCTACCGTCGTTCAGAAAGATTTCGG
TGTTCATCTAAGTCAAAATGTCGAGGAAAGACACGGTTTCGCTGCTCAGGGTCCTCGCAG
AAAGGCAATGGGCAAGGCTAGAAACTACCTTCTCAGTGCTGCCATGAAGCCTGAGCACAG
TTGGGTCTACTGGCGCGACGTCGACATCAACGATAGCCCTTCCAAAATCATCGAGGACTT
TATCGCTCACGACCGCGATGTTCTTGTTCCTAACGTCTGGTTCCACCGCTACGAGAACGG
TCGCGACATTGAAGGAAGATTCGACTACAACTCATGGCAAGAATCCGAAAAGGGTCTCAA
GCTGGCCGCCACACTCGACAAAGATACCGTCCTGGCAGAAGGCTACAAAGAGTATGACAC
CGGCCGCACATACATGGCTAAGATGGGCGACTGGCGCGAGGACAAGGATGTCGAAATCCC
ACTGGACGGCATCGGCGGCGTTAACATTCTGGTCAAGGCCGATGTCCACCGCTCCGGTAT
CAACTTCCCTTCCTACGCGTTCGAGAACCAAGCCGAGACAGAAGGCTTTGCGAAGATGGC
CAAGCGTGCGGGATACGGTGTTGGATTGCCGAATTACATTGTGTGGCATATTGATACGGA
TGAGAAGCCTGGAAACGCGTAGATGCTTGGTTGATTTTGATAGAGATGTATTCttttttt
tGCCTCTTGTTGCTTGTATTTGTTTCTTTCCCTTCTTGCGCCATGAGCGTGTAGCTCACA
TTGTCTTGCGTTTTCGGTGTTCGTTTTTCTTTCTCCTTCGGTTGCTGCTGGAGAGCATTT
GGATGAGGTATGAGCTGTCAGAAGAACAGCAAGGAAGAACAAGGCAGACAAACCCACAGC
ATTTGCATCGAA
>MATOU-v1_14873296
TTTTGAGGTGTGAATACGAGTATCTGCTATGGTAAATTTAAATAACTTTACATATACATA
AACTAGCACCCATGAAGTAACTTATTCTTTGGAAACGAGTATCCGGCATCTTCCCAAGAT
GTCAAATTGACGTTTTCGTATGCATTGAGATGATCCTGAATGTACTGGTAGGTTGGATGG
TCTTCAGGGTCGCATGTTACACTGATTTGATCTTCCGGCTGGTAAACTCGCACATGGTCG
ATTCTCATCGTCACTGGGAAGTTGAGCGAGGGCCAATCGATGTATGCCCAATTATTGGAA
ATACCCAAATTCATGATGACAGACATAGGCTCCTTTGAGATACGGCGGAAATCAATATTA
CCATTGGGTCCCAATGCATATGCTTTGACCGTTAACGTTGGCTCACCAACATACCAAGTA
CAATAACCATCGTCATCGTCATTGAGATACTCGTATCCATACATTTGAAATTTGGGATCT
TCGTATTTTTCGTACCACGCATTGTTGAGTGTAGTAACACCAGAAACAGCTTGTTGGAAG
GGACCTCCGGCATACGAGTTGATTGAAGTGACCGTATCGTCGTTAATGGAAGCAAAATTG
TAATCAGGAATGTACCAAATGTCAAAAGGAGCAATTTGCATAGATTGGGAAGCCAAACCG
AGTTTCAAGTTTGAAGCATACTCAGCTTCAAGAGCATCGATTTCGGGAGCTCCACGACCA
GTTCCAACGTTGGGATGGTCCAGTCCACTACAAGCACACAGAGGCAACCGTTGACCAGGA
AGGTACGAAATTCCATCAGGAGAGGATTGGTTAGCAGTAATACCAGCATCACAGGCTTCA
TAGGTGTAAGGCCACACACCGTCTGTAGTTGCCATATATCCTGGTCTACCCAAGTTACCC
ATTGTCCACAAACCAGGCCACAAACCTGAAACATTTCCGTAATTGGGAAGTTGAGCAGAA
AATTCAATCATACCTTGGGTGAAACACATTTTGTTCCAACTTTGAACCATTCCTGATCTA
TAGAATAAATCATGATTCTTGAAAGCGTCCATACGAAGGTTCAAAGTACCATTTTCAGTC
CAGACAGCATCTGGATCGTACCATTCCAAATCATGAGTAGCAGCATAATGGAAGTTTGGA
GCGGTGAAAAATTGATCATCACCATCGTAAAATGTACGACCATCTTTATTAAATTCATCC
GAGAACACTAATTTCCAAGTACCCGTAGTGACTTTTCTGGTGAGGTACTCATCAGGAGTA
TCAGGATCCACCAAACTCGTTCTTATAGCACTCAATATGGGATATTTATAGTGTGTTAAT
ATCTCATATGATTCTGGAGTATAATGGTCGGCGACACCGGAGTATGTGAGAACTGGGAAA
AGAATAAACACACAAATCACAGCGATGACGAGAAAAATGATACCGAAAAGGCCACCCATA
GAACGACGGTCCATGTTCTTCAAATCATACATGAATCTGTTTTTGTCATACAGAGCATCG
GCAATGGGGTCTGGGTTATGAAGGTAATCATCTGGTTCCTTTTCGTCGATATGAAGCGGG
AATGACGATGCAGGGTATCCACCAAAGGGACTAAAGTCTGTGGCCGCAATGAACGGATTT
GTGCTCTTGTTCGAGCTCAGCGAAGTATCATCACTCTTTGGTGTCTGTTTGTTTTGATAC
AAGTGTGACGAAAGAGACGTGGAAGAGACTACCCTGGAACCTGCCATCAGAGGATACCTA
TCATATTCCGATGGTACTTGTATGTTATTGTCACTGTTCTGGGCATTGTTTCCCTCCAAC
GATGTCTCATGAGAAAGAAGATTCGATGAGGTGCCATTCTTCAGGTAATAACCATTGTAT
GAACTGAACGGTTTTCCATAATGAAAGTTGGTATCGTCCAGCTGAGATGACGAGATATGG
TTGGAGCCGAACGACGACGACAGATCCTCATCTTGAGGAGAGGCAAACGGGTTCTGTTCG
CCGTCCTGCGGCACGTTGGGACTGTTATATGTGAGATCACGTTGAGCCATGATCAAAGAG
GGGTACGACAGGCAAATGGAAACGACTGCTTTTTAGTAGTGGTTCGAGGATTAAGCTATG
TCTGGATCAAAAACGAGCGATATTCCAGACTTGTTGAttttttttGTCACCAATATATCA
GGATGGGTGAACGTAAAAACGGATAGTATTGATTTCAAGG
>MATOU-v1_14875092
ACATGGGGAATCAAGTTAATACATATTCCCCCTTATTAGTAAACCATGGCTACTGATTCT
AATTTCCTCATTGACTTCTTGATGGGTGGTGTTTCCGCCGCCGTCGCCAAGACTGCTGCT
GCTCCAATTGAAAGAGTCAAGTTGTTGATTCAAAACCAAGATGAAATGTTGAAACAAGGT
AGATTGTCTCACAAATATACTGGTATCATTGACTGTTTCAGAAGAACTGCTGCTGATGAA
GGTATCGTGTCATTCTGGAGAGGTAACACTGCCAATGTTATCAGATACTTCCCAACCCAA
GCTTTGAACTTTGCTTTCAAGGATCAAATTAAAGCTTTGTTTGGTTTCAAGAAGGATGAA
GGATACTGGAAATGGTTTGCTGGTAACTTGGCTTCTGGTGGTATTGCCGGTGCTTTGTCT
TTGGCATTTGTCTACTCTTTGGATTACGCCAGAACTAGATTGGCCAACGATGCTAAGTCT
GCTAAAGGTGATGGTAAAGGTAGAGAATTCAACGGTTTGATTGATGTTTACAAGAAGACT
TTGGCTTCTGATGGTATTGCTGGTTTGTACAGAGGTTTCGGTCCATCTGTTATCGGTATT
GTTGTTTACAGAGGTTTGTATTTCGGTTTGTATGATTCCTTGAAACCAGTTGTTTTGGTT
GGTCCATTGGAAGGTTCTTTCTTGGCTTCATTCTTGTTGGGTTGGGTTGTTACTACCGGT
GCTTCTACTGCTTCTTACCCATTGGATACTATTAGAAGAAGAATGATGATGACTTCTGGT
CAAGCTGTTAAATACGATGGTGCTTTGGACTGTGCTAGAAAGGTTGTTGCTGCCGAAGGT
GTCAAGTCATTGTTCAAGGGTTGTGGTGCTAACATCTTGAGAGGTGTTGCCGGTGCCGGT
GTTATCTCATTGTACGATCAATTGCAAGTTCTCCTTTTCGGTAAGAAATTCAAGTAAATG
TGATTAACATTTGTACTTGGAACTTCTTTGCCTAGGGAGGTGAGAGCAAGAGAGAGAGGT
GTTCTATAAATTTTTGTTTCCTTTTGtatatatattatatataAAGTTAATATTGTAAAA
CAAAATTACACTTTT
>MATOU-v1_14876004
ACATGGGGACGTCACAATGTCTAAGCAACAGAAGAACGAGTTCTCCGAGAAGCTGATGGT
CAGCGCCGATGGCCAGCTGAGCGCTTCGCAGAAGATCCCCCAGATCGCTAGACCCTTTGT
CAGCGAGAAGGCACTCAAGTACATCGACCTTGTCGAGAAGTTTGTCGAAGAAGAATGTAT
CCCCGCCGATCGTGTCGTCTTGCAACAGATTGGCGACACGACAGTTGAGCGCTTCAGCTC
CCACGCACCCATCATCGAGGACCTCAAGAAGCGTGCAAGAGAGCTAGGACTATGGAACAT
GTTCCTGCCAAGGAACCACTTCAAGGAGGGAGCCGGCTTCAGCAACCTCGAGTATGGTCT
CATGGCCGAGTACCTGGGCAAGAGTCGCACCGCCTCCGAGGCAACCAACTGCGCTGCCCC
CGACACTGGAAACATGGAGGTGCTCGCCAAGTACGGCACACAGGCTCAGAAGGACAAATG
GCTCAAGCCTCTGCTCGAGGGCCAGATCCGTTCTGCCTTCCTCATGACCGAGCCTGATGT
TGCCTCGAGTGATGCTACCAACATCACTCTTGACATTCGCCGCGAGGGCAACGAATACGT
CCTCAACGGTTCTAAATGGTGGTCCTCGGGTGCTGGTGACCCTCGCTGCAAGATCTACAT
CACCATGGGCAAGACGGACAAGAACAACCCCAGCCCCTACAAGCAGCAGAGCGTCGTCCT
CGTTCCAGCTGATACCCCCGGCATCACCGTCCACCGCATGCTCGGTGTCTTTGGCTACGA
TGATGCCCCTCACGGCCACGGTCACATCTTCTTCAAGAACGTCCGCGTGCCTCTGGAGAA
CATCGTCCTGGGCGAGGGTCGTGGTTTCGAGATCATTCAGGGACGTCTGGGCCCTGGTCG
CATTCACCACGCCATGAGAAGTATTGGCGCTGCCGAGAAAGCCCTCGAGCTCTTCATCGC
TCGTGTCAACGATCCCCGCAAGATGGCCTTCGGCAAACTTTTGAACGAACACGGTGTTAT
GATCGAACGCATCGCCAAATCGCGTGTTGAGATCGATTCCGCCCGTCTCTCAGTCCTGAA
CGCTGCAATCACAATTGACACCAAGGATGCCAAGTTTGCACTCAAGGAGATTGCTGAGGC
CAAGGTCTTGGTTCCTACCATGGCCTTGAAAGTAATTGATCGTGCTATCCAGGCTTACGG
TGGTGCTGGTGTATCACAGGATACTCCTCTAGCAAACATGTATGCTCAAGGCAGAACCAT
GAGGATCGTAGATGGTCCTGATGAGGTGCATTTGGTGCAGCTGGGCAGGAACGAGAACAA
GAGAGGCAAATTCTTGCTGGACAGATTAGAGCGACAGAGGCAGACCAGTGAGCAGATGGC
AGCAAAGCATGGCCTGAAGCTCAAGGATGTGCTGCTCTTGGACCGTGTCATGTCCGAGAA
GTCCAAGCTTTAAGGGTTCTCTCATGTTTGTATAATGATTATCTAGAAAACGGTTCATAT
[truncated: 9,297,722 more chars]
